# Supplementary material for: The contribution of cyclic imide stereoisomers on cereblon-dependent activity
Source: Chem Sci. 2025 May 28;16(25):11519–29. doi: 10.1039/d5sc01371b (PMC12117711; doi:10.1039/d5sc01371b)
Supplement: SC-016-D5SC01371B-s002 [file SC-016-D5SC01371B-s002.xlsx]

## Sheet: Table S7 PSMs
Confidence	PSM Ambiguity	Annotated Sequence	Modifications	# Proteins	Master Protein Accessions	Protein Accessions	# Missed Cleavages	Charge	DeltaScore	DeltaCn	Rank	Search Engine Rank	m/z [Da]	MH+ [Da]	Theo. MH+ [Da]	DeltaM [ppm]	Deltam/z [Da]	Activation Type	MS Order	Isolation Interference [%]	Average Reporter S/N	Ion Inject Time [ms]	RT [min]	First Scan	Spectrum File	File ID	Abundance: 126 (DMSO1)	Abundance: 127N (DMSO2)	Abundance: 127C (DMSO3)	Abundance: 128N (DMSO4)	Abundance: 128C (rac1)	Abundance: 129N (rac2)	Abundance: 129C (rac3)	Abundance: 130N (rac4)	Abundance: 130C (S1)	Abundance: 131N (S2)	Abundance: 131C (S3)	Abundance: 132N (S4)	Abundance: 132C (R1)	Abundance: 133N (R2)	Abundance: 133C (R3)	Abundance: 134N (R4)	Quan Info	XCorr	# Protein Groups	Contaminant	Percolator q-Value	Percolator PEP
High	Unambiguous	[R].gNFGGSFAGSFGGAGGHAPGVAR.[K]	N-Term(TMTpro)	1	P52272	P52272	0	3	0.708	0	1	1	780.392	2339.16	2339.16	0.64	0.0005	CID (Collision Induced Dissociation)	MS2	0	5.6	97.716	67.1238	8312	201015L_YASAM07425_YAII63-50.raw	F4.19	1515.15	1279.03	988.892	1382	703.202	2023.6	2297.52	1437.88	1006.41	1689.34	2023.84	1245.86	1176.83	1527.99	949.443	698.359		7.02	1	FALSE	0.000104199	1.24628e-16
High	Unambiguous	[R].lLTSFLPAQLLR.[L]	N-Term(TMTpro)	1	P08195	P08195	0	2	0.5449	0	1	1	838.526	1676.04	1676.04	1.18	0.00099	CID (Collision Induced Dissociation)	MS2	1.88896	10.2	119.5	89.9344	12216	201015L_YASAM07425_YAII63-50.raw	F4.19	2253.67	2390.2	3075.56	3133.96	2370.09	2597.41	2585.9	2624.36	1419.89	2804.66	3177.77	2527.88	2348.28	2398.67	2490.05	1899.63		3.34	1	FALSE	0.0001042	1.168e-05
High	Unambiguous	[K].eVDEQMLNVQNk.[N]	N-Term(TMTpro); K12(TMTpro)	4	P07437; P68371	Q13885; P07437; P68371; Q9BVA1	0	2	0.4722	0	1	1	1028.05	2055.1	2055.1	-0.62	-0.00063	CID (Collision Induced Dissociation)	MS2	21.781	16.8	119.5	65.3407	13618	201015L_YASAM07425_YAII63-13.raw	F4.9	3329.23	3753.76	4832.37	5268.32	2921.6	5202.91	5871.45	3544.57	633.315	3432.6	5082.96	6122.82	4234.54	6187.6	3906.52	2468.83		4.68	2	FALSE	0.0001042	3.726e-06
High	Unambiguous	[K].yDYNSGEELESYk.[G]	N-Term(TMTpro); K13(TMTpro)	1	Q9Y3F4	Q9Y3F4	0	2	0.6092	0	1	1	1103.05	2205.09	2205.08	0.65	0.00071	CID (Collision Induced Dissociation)	MS2	0	14.7	119.5	65.2948	13606	201015L_YASAM07425_YAII63-13.raw	F4.9	3216.41	3158.7	3739.79	2732.02	3994.07	4936.42	5245.26	3975.76	1085.1	3106.43	3535.61	4409.94	4041.02	5700.54	4532.68	1767.91		5.45	1	FALSE	0.0001042	9.814e-07
High	Unambiguous	[R].gDFDENLNYPEQk.[V]	N-Term(TMTpro); K13(TMTpro)	1	Q9UBQ0	Q9UBQ0	0	2	0.5689	0	1	1	1089.05	2177.1	2177.1	-1.57	-0.00171	CID (Collision Induced Dissociation)	MS2	29.2299	17	119.5	65.282	13603	201015L_YASAM07425_YAII63-13.raw	F4.9	4242.98	3993.87	4384.07	4967.53	3495.84	5818.87	5695.88	5343.48	1700.94	3329.64	4200.04	5599.7	4368.29	4160.44	4772.74	2942.94		3.41	1	FALSE	0.0001042	0.0001881
High	Unambiguous	[R].yHTSQSGDEMTSLSEYVSR.[M]	N-Term(TMTpro)	1	P08238	P08238	0	2	0.7369	0	1	1	1241.08	2481.15	2481.15	0.53	0.00066	CID (Collision Induced Dissociation)	MS2	0	5.6	119.5	65.2339	13592	201015L_YASAM07425_YAII63-13.raw	F4.9	1191.25	1524.24	2140.79	1318.14	1374.58	1331.11	979.076	1329.61	786.079	1396.35	1120.3	2650.44	1003.29	2265.97	1351.07	1175.94		6.5	1	FALSE	0.0001042	3.97e-08
High	Unambiguous	[K].dQVTAQEIFQDNHEDGPTAk.[K]	N-Term(TMTpro); K20(TMTpro)	1	P13010	P13010	0	3	0.6052	0	1	1	951.15	2851.44	2851.44	0.05	5e-05	CID (Collision Induced Dissociation)	MS2	7.53684	24.3	105.979	65.1897	13580	201015L_YASAM07425_YAII63-13.raw	F4.9	5984.36	3598.13	6137.27	5618.61	5223.18	8244.32	9586.41	6279.71	1440.5	4594.55	5837.27	8493.12	6556.2	7947.14	5380.61	3608.8		5.04	1	FALSE	0.0001042	1.07e-06
High	Unambiguous	[R].yHTSQSGDEMTSLSEYVSR.[M]	N-Term(TMTpro)	1	P08238	P08238	0	3	0.7575	0	1	1	827.723	2481.15	2481.15	0.75	0.00062	CID (Collision Induced Dissociation)	MS2	22.9209	14.9	17.895	65.1452	13566	201015L_YASAM07425_YAII63-13.raw	F4.9	3421	3701.59	4522.58	3643.9	3423.27	4285.87	3996.14	3880.44	1975.35	3205.95	4857.65	4173.95	3823.54	4498.72	4431.77	2528.64		5.69	1	FALSE	0.0001042	3.494e-08
High	Unambiguous	[K].aENNSEVGASGYGVPGPTWDR.[G]	N-Term(TMTpro)	1	Q08211	Q08211	0	3	0.7776	0	1	1	823.065	2467.18	2467.18	-0.48	-0.00039	CID (Collision Induced Dissociation)	MS2	8.49504	9.3	28.45	65.0761	13547	201015L_YASAM07425_YAII63-13.raw	F4.9	3555.1	2998.78	3503.64	3212.87	3501.92	3974.84	2700.79	2639.09	1676.02	3380.21	4089.7	3140.47	3721.83	3989.86	4006.92	4020.86		5.26	1	FALSE	0.0001042	1.347e-06
High	Unambiguous	[R].aLEESNYELEGk.[I]	N-Term(TMTpro); K12(TMTpro)	7	P13645	119581085; P13645; P13645; 88041; 547749; 88042; 71528	0	2	0.6129	0	1	1	995.535	1990.06	1990.06	0.17	0.00017	CID (Collision Induced Dissociation)	MS2	15.2711	18.7	119.5	65.0513	13540	201015L_YASAM07425_YAII63-13.raw	F4.9	3676.43	2908.28	7014.68	6721.21	3701.72	3982.24	5858.75	3480.31	1712.81	3286.5	5756.96	8458.86	4176.37	7142.18	2947.91	3296.61		4.03	1	TRUE	0.0001042	1.005e-05
High	Unambiguous	[K].fSNQETcVEIGESVR.[G]	N-Term(TMTpro); C7(Carbamidomethyl)	1	P60891	P60891	0	2	0.5835	0	1	1	1030.01	2059.01	2059.01	-1.04	-0.00107	CID (Collision Induced Dissociation)	MS2	0	11.8	119.5	65.0267	13534	201015L_YASAM07425_YAII63-13.raw	F4.9	3221.34	2172.95	2422.41	3544.33	3648.03	4918.18	3520.85	2632.85	2211.13	3007.79	2913.4	3618.28	3451.07	3302.74	2159.77	1574.5		5.09	1	FALSE	0.0001042	4.903e-07
High	Unambiguous	[K].dLEEDHAcIPIk.[K]	N-Term(TMTpro); C8(Carbamidomethyl); K12(TMTpro)	1	P13639	P13639	0	2	0.4657	0	1	1	1024.55	2048.1	2048.1	-0.52	-0.00053	CID (Collision Induced Dissociation)	MS2	0	15.9	119.5	65.002	13528	201015L_YASAM07425_YAII63-13.raw	F4.9	4084.89	3455.3	5214.17	3739.39	2786.09	4907.17	5998.56	4532.9	620.148	2716.87	3508.86	5859.59	3635.95	4817.44	3176.22	2640.62		4.23	1	FALSE	0.0001042	4.15e-06
High	Unambiguous	[R].mAEIGEHVAPSEAANSLEQAQAAAER.[L]	N-Term(TMTpro); M1(Oxidation)	1	P27708	P27708	0	3	0.6478	0	1	1	1000.83	3000.47	3000.47	0.02	2e-05	CID (Collision Induced Dissociation)	MS2	16.7754	7.2	73.88	64.9758	13520	201015L_YASAM07425_YAII63-13.raw	F4.9	2323.53	1911.26	2019.92	1850.78	1544.57	1639.86	2332.87	1386.64	1270.81	1311.69	1916.25	1795.69	2118.19	2103.61	1803.39	1376.17		6.02	1	FALSE	0.0001042	2.226e-07
High	Unambiguous	[R].eTLPAEQDLTTk.[N]	N-Term(TMTpro); K12(TMTpro)	1	P25786	P25786	0	2	0.5117	0	1	1	977.553	1954.1	1954.1	-0.39	-0.00039	CID (Collision Induced Dissociation)	MS2	13.3676	24.8	98.673	64.9265	13504	201015L_YASAM07425_YAII63-13.raw	F4.9	6167.36	4966.49	6271.3	6631.89	5494.08	7628.76	8723.71	7439.45	1492.1	4019.55	7435.37	9899.6	7167.09	9623.6	5283.67	4277.97		3.85	1	FALSE	0.0001042	8.029e-06
High	Unambiguous	[K].dLEEDHAcIPIk.[K]	N-Term(TMTpro); C8(Carbamidomethyl); K12(TMTpro)	1	P13639	P13639	0	3	0.3753	0	1	1	683.37	2048.1	2048.1	-0.89	-0.0006	CID (Collision Induced Dissociation)	MS2	12.7189	17.6	15.995	64.9137	13500	201015L_YASAM07425_YAII63-13.raw	F4.9	4957.83	3819.07	4430.98	3687.11	2801.73	6783.12	6762.03	3458.84	961.297	3009.56	5046.38	6872.37	4199.08	5462.78	4383.6	3146.68		3.97	1	FALSE	0.0001042	1.64e-05
High	Unambiguous	[K].sLYVAEYHSEPVEDEkP.[-]	N-Term(TMTpro); K16(TMTpro)	1	P26196	P26196	0	3	0.4966	0	1	1	867.45	2600.34	2600.34	-0.59	-0.00051	CID (Collision Induced Dissociation)	MS2	12.1873	27.7	73.625	65.3903	13636	201015L_YASAM07425_YAII63-13.raw	F4.9	5915.02	7187.88	6602.33	7940.86	5029.31	8032.66	10041.7	8323.58	1654.05	4283.71	6393.84	9511.58	7062.55	7982.33	7980.63	4765.58		4.41	1	FALSE	0.0001042	2.56e-07
High	Unambiguous	[R].wQPDTEEEYEDSSGNVVNk.[K]	N-Term(TMTpro); K19(TMTpro)	1	Q12874	Q12874	0	3	0.5548	0	1	1	945.459	2834.36	2834.36	0.42	0.00039	CID (Collision Induced Dissociation)	MS2	10.0093	21.1	74.33	65.4048	13641	201015L_YASAM07425_YAII63-13.raw	F4.9	4484.42	4092.09	6114.79	4971.12	4909.94	6005.24	6976.03	4759.57	1340.68	4903.11	5765.39	7884.44	4477.6	7175.85	4920.07	2810.76		4.56	1	FALSE	0.0001042	3.669e-06
High	Unambiguous	[K].lEAEGVPEVSEk.[Y]	N-Term(TMTpro); K12(TMTpro)	1	O76003	O76003	0	2	0.3137	0	1	1	948.035	1895.06	1895.06	0.43	0.00041	CID (Collision Induced Dissociation)	MS2	21.0634	23.8	92.187	65.4399	13650	201015L_YASAM07425_YAII63-13.raw	F4.9	4713.64	5863.15	7092.16	6369.75	4962.62	7237.72	7060.84	5305.01	2290.03	5738.06	5858.89	7233.06	7173.75	7261.83	6178.26	3098.63		3.57	1	FALSE	0.0001042	0.0001329
High	Unambiguous	[R].aGVLAHLEEER.[D]	N-Term(TMTpro)	2	P35579	P35580; P35579	0	2	0.4362	0	1	1	764.426	1527.85	1527.85	0.4	0.0003	CID (Collision Induced Dissociation)	MS2	21.5287	12.1	19.364	65.602	13701	201015L_YASAM07425_YAII63-13.raw	F4.9	3157.21	2816.64	3275.54	3709.25	2804.11	3124.69	3392.85	2304.74	1256.74	2188.51	3243.49	4673.61	2896.1	3340.56	2845.69	3245.91		3.37	1	FALSE	0.0001042	1.326e-05
High	Unambiguous	[K].gEGPEVDVNLPk.[A]	N-Term(TMTpro); K12(TMTpro)	1	Q09666	Q09666	0	2	0.3746	0	1	1	931.53	1862.05	1862.05	0.95	0.00089	CID (Collision Induced Dissociation)	MS2	13.4791	27.9	81.302	66.5924	13963	201015L_YASAM07425_YAII63-13.raw	F4.9	6440.35	6245.56	7036.57	7708.61	4493.62	9701.88	9479.01	5018.79	1618.43	4430.48	10143.3	10135.3	7109.74	9703.8	7109.95	4732.33		3.23	1	FALSE	0.0001042	6.956e-05
High	Unambiguous	[K].vYENYPTYDLTER.[K]	N-Term(TMTpro)	1	P35659	P35659	0	2	0.4828	0	1	1	983.988	1966.97	1966.97	-1.43	-0.00141	CID (Collision Induced Dissociation)	MS2	8.87059	15.4	119.5	66.5873	13961	201015L_YASAM07425_YAII63-13.raw	F4.9	4201.84	2565.1	3861.19	3324.37	4197	4028.52	4630.63	3089.17	2041.7	4464.86	4329.13	3981.53	4188.34	4072.01	3498.36	3782.01		3.79	1	FALSE	0.0001042	6.795e-05
High	Unambiguous	[R].sLETENSALQLQVTER.[E]	N-Term(TMTpro)	1	P20700	P20700	0	2	0.4241	0	1	1	1061.57	2122.13	2122.13	-1.47	-0.00156	CID (Collision Induced Dissociation)	MS2	33.3246	16	73.37	66.575	13957	201015L_YASAM07425_YAII63-13.raw	F4.9	4504.05	2782.72	5381.52	3559.36	3798.75	4320.76	5014.79	3642.93	1878.7	4449.47	3450.78	5750.08	4699.81	4629.61	2884.19	2735.86		5.47	1	FALSE	0.0001042	3.771e-06
High	Unambiguous	[K].dHQYQFLEDAVR.[N]	N-Term(TMTpro)	1	Q13263	Q13263	0	2	0.1965	0	1	1	912.964	1824.92	1824.92	0.26	0.00024	CID (Collision Induced Dissociation)	MS2	42.4605	19.7	57.505	66.522	13942	201015L_YASAM07425_YAII63-13.raw	F4.9	4546.54	3840.86	6261.25	5386.85	4373	7276.06	6010.74	3798.39	1155.49	4382.1	5050.69	5791.09	5013.17	5125.53	5570.33	3032.41		2.29	1	FALSE	0.0001042	0.0001577
High	Unambiguous	[K].dHQYQFLEDAVR.[N]	N-Term(TMTpro)	1	Q13263	Q13263	0	3	0.6168	0	1	1	608.979	1824.92	1824.92	0.76	0.00046	CID (Collision Induced Dissociation)	MS2	11.3589	4.7	26.72	66.4786	13930	201015L_YASAM07425_YAII63-13.raw	F4.9	1185.06	992.12	2489.56	1123.58	1240.08	2702.02	1980.85	1221.94		1696.01	1474.12	1960.11	1472.74	2780.41	1928.49	1643.97		4.41	1	FALSE	0.0001042	1.58e-05
High	Unambiguous	[R].eTENDDLTNVIQk.[M]	N-Term(TMTpro); K13(TMTpro)	1	O95373	O95373	0	2	0.4494	0	1	1	1064.08	2127.14	2127.14	0.63	0.00067	CID (Collision Induced Dissociation)	MS2	9.49015	13.2	119.5	66.4315	13919	201015L_YASAM07425_YAII63-13.raw	F4.9	2598.09	2550.43	4064.58	3560.81	2089.97	4851.49	4179.48	2585.97	1005.39	2811.01	3619.58	6214.64	4011.02	5150.18	3031.64	2085.95		4.94	1	FALSE	0.0001042	1.767e-06
High	Unambiguous	[R].mVSSYVGENAEFER.[Q]	N-Term(TMTpro)	1	P55809	P55809	0	2	0.4488	0	1	1	961.469	1921.93	1921.93	1.09	0.00105	CID (Collision Induced Dissociation)	MS2	38.2198	20.2	74.21	66.3462	13899	201015L_YASAM07425_YAII63-13.raw	F4.9	4413.54	4922.33	4773.91	5844.8	5201.86	5088.08	6009.45	6096.16	2610.39	4406.73	6634.11	6620.83	6455.92	5371.73	4213.16	5160.11		3.81	1	FALSE	0.0001042	2.548e-05
High	Unambiguous	[R].eGIVTATEQEVk.[E]	N-Term(TMTpro); K12(TMTpro)	1	Q12931	Q12931	0	2	0.3565	0	1	1	956.546	1912.09	1912.09	-1.65	-0.00157	CID (Collision Induced Dissociation)	MS2	16.8779	24.4	64.843	66.3437	13898	201015L_YASAM07425_YAII63-13.raw	F4.9	4713.75	4968.36	7657.11	6379.93	5273.11	9273.49	8407.89	5612.13	2712	4332.1	4965.69	8502.53	8101.33	8926.78	7290.42	4485.58		3.59	1	FALSE	0.0001042	0.0001181
High	Unambiguous	[K].aMEVDERPTEQYSDIGGLDk.[Q]	N-Term(TMTpro); K20(TMTpro)	1	P17980	P17980	0	3	0.5508	0	1	1	954.486	2861.44	2861.45	-1.85	-0.00176	CID (Collision Induced Dissociation)	MS2	0	27	63.921	66.2528	13876	201015L_YASAM07425_YAII63-13.raw	F4.9	6278.03	5505.18	6720.78	7689.35	6769.77	8184.3	10054.7	6513.59	3053.89	6034.06	7646.37	10087.8	6874.61	7313.09	8605.19	4717.57		4.43	1	FALSE	0.0001042	4.927e-05
High	Unambiguous	[K].eEYQLVQVEQk.[A]	N-Term(TMTpro); K11(TMTpro)	1	Q9NR30	Q9NR30	0	2	0.4074	0	1	1	1001.06	2001.12	2001.11	0.29	0.00029	CID (Collision Induced Dissociation)	MS2	0	15.3	73.88	66.2034	13865	201015L_YASAM07425_YAII63-13.raw	F4.9	3630.13	2694.16	4421.48	3440.02	3272.17	4721.24	5783.02	3746.31	995.946	2669.36	4235.57	5900.96	4828.59	4488.3	4492.43	2242.63		4.05	1	FALSE	0.0001042	6.017e-05
High	Unambiguous	[K].gEGPDVDVNLPk.[A]	N-Term(TMTpro); K12(TMTpro)	1	Q09666	Q09666	0	2	0.4906	0	1	1	924.522	1848.04	1848.04	0.58	0.00053	CID (Collision Induced Dissociation)	MS2	57.2115	31.2	119.5	66.1377	13842	201015L_YASAM07425_YAII63-13.raw	F4.9	5900.21	5505.06	8848.42	8028.6	7847.12	9969.8	9521.42	7282.36	1967.8	6286.9	9884.58	12146.6	8112.16	9717.55	7350.57	6114.84		3.2	1	FALSE	0.0001042	0.0001197
High	Unambiguous	[R].yHTSQSGDEMTSLSEYVSR.[M]	N-Term(TMTpro)	1	P08238	P08238	0	3	0.7644	0	1	1	827.723	2481.15	2481.15	0.52	0.00043	CID (Collision Induced Dissociation)	MS2	0	13.9	15.435	66.1063	13833	201015L_YASAM07425_YAII63-13.raw	F4.9	2991.84	3058.92	3598.71	3548.32	3355.98	3948.89	4057.29	4272.11	1102.48	2943.33	4010	3795.44	4471	3367.39	3371.99	2758.76		6.24	1	FALSE	0.0001042	9.541e-06
High	Unambiguous	[K].nAIANASTLAEVER.[L]	N-Term(TMTpro)	1	P09661	P09661	0	2	0.4986	0	1	1	881.985	1762.96	1762.96	0	0	CID (Collision Induced Dissociation)	MS2	22.0326	30.9	72.656	65.7133	13738	201015L_YASAM07425_YAII63-13.raw	F4.9	7760	7802.98	6727.49	7719.39	6921.55	9027.93	8748.5	7167.13	3755.34	7257.75	9594.34	10358.2	7643.96	9364.33	8974.17	7607.44		3.69	1	FALSE	0.0001042	5.263e-06
High	Unambiguous	[K].dQVTAQEIFQDNHEDGPTAk.[K]	N-Term(TMTpro); K20(TMTpro)	1	P13010	P13010	0	4	0.4771	0	1	1	713.615	2851.44	2851.44	0.45	0.00032	CID (Collision Induced Dissociation)	MS2	16.687	9.2	19.364	65.6766	13725	201015L_YASAM07425_YAII63-13.raw	F4.9	2969.73	1216.24	3651.67	3334.53	1635.31	4703.9	6403.57	3780.42	658.206	2627.7	2598.2	4555.59	2935.36	3283.67	3786.45	2245.64		3.27	1	FALSE	0.0001042	4.405e-05
High	Unambiguous	[K].nETGGGEGIEVLk.[N]	N-Term(TMTpro); K13(TMTpro)	1	P48739	P48739	0	2	0.3282	0	1	1	956.037	1911.07	1911.07	-0.87	-0.00083	CID (Collision Induced Dissociation)	MS2	17.0005	25.3	57.316	65.665	13721	201015L_YASAM07425_YAII63-13.raw	F4.9	4248.62	4601.48	6735.3	6407.38	5350.35	7878.1	9264.72	6616.47	2022.07	5219.41	6691.08	8984.71	6491.64	8545.06	7772.65	5102.96		3.9	1	FALSE	0.0001042	0.0002192
High	Unambiguous	[K].hNDDEQYAWESSAGGSFTVR.[TA]	N-Term(TMTpro)	3	P07900; P08238	P07900; P08238; Q14568	0	3	0.7911	0	1	1	854.06	2560.17	2560.17	-0.07	-6e-05	CID (Collision Induced Dissociation)	MS2	6.17026	18.7	3.303	64.85	13479	201015L_YASAM07425_YAII63-13.raw	F4.9	17022.2	14356.4	22437.8	18357.8	10737.7	22199.1	19154	14874.5	5383.94	16247.3	20225.6	21369.5	20221.4	19709	19822.6	10826.6		7.18	2	FALSE	0.0001042	6.87e-08
High	Unambiguous	[K].sYEPLEDPGVk.[S]	N-Term(TMTpro); K11(TMTpro)	1	P37837	P37837	0	2	0.4098	0	1	1	921.509	1842.01	1842.01	-1.5	-0.00139	CID (Collision Induced Dissociation)	MS2	29.9463	48.8	42.01	64.7692	13453	201015L_YASAM07425_YAII63-13.raw	F4.9	10984.8	9487.75	12740.6	12922.9	9457.75	16064	17234.8	11888.1	2724.63	8529.99	13091.8	14953.8	13452	16353.4	12312.9	7642.87		3.27	1	FALSE	0.0001042	0.0002572
High	Unambiguous	[K].aENNSEVGASGYGVPGPTWDR.[G]	N-Term(TMTpro)	1	Q08211	Q08211	0	2	0.7717	0	1	1	1234.09	2467.18	2467.18	-1.26	-0.00156	CID (Collision Induced Dissociation)	MS2	0	4.9	119.5	64.7373	13442	201015L_YASAM07425_YAII63-13.raw	F4.9	1740.84	869.632	1988.7	2152.58	1099.99	1159.22	1710.95	1021.38		1187.96	1091.54	2259.57	695.142	1191.44	1472.53	851.304		6.92	1	FALSE	0.0001042	5.558e-09
High	Unambiguous	[K].fSNQETSVEIGESVR.[G]	N-Term(TMTpro)	1	P11908	P11908	0	2	0.4357	0	1	1	993.508	1986.01	1986.01	-0.67	-0.00066	CID (Collision Induced Dissociation)	MS2	10.9684	15.4	73.94	64.6881	13426	201015L_YASAM07425_YAII63-13.raw	F4.9	4324.55	3887.09	3814.44	4201.69	2991.95	5013.89	4122.28	4137.76	2025.53	4585.2	5085.52	4944.72	3907.84	3655.26	4368.63	2405.58		4.2	1	FALSE	0.0001042	2.003e-05
High	Unambiguous	[K].aTLELTHNWGTEDDETQSYHNGNSDPR.[G]	N-Term(TMTpro)	1	Q04760	Q04760	0	3	0.6915	0	1	1	1131.18	3391.54	3391.54	-0.16	-0.00018	CID (Collision Induced Dissociation)	MS2	56.5224	4.1	72.8	64.1168	13226	201015L_YASAM07425_YAII63-13.raw	F4.9	1287.69	987.222	1053.02	1053.56	749.634	1201.9	1503.05	1338.66		710.158	1423.62	928.07	683.378	1403.08	1054.67	1184.12		6.03	1	FALSE	0.0001042	1.221e-05
High	Unambiguous	[R].vLGTSPEAIDSAENR.[F]	N-Term(TMTpro)	1	P27708	P27708	0	2	0.6146	0	1	1	931.991	1862.98	1862.98	-1.21	-0.00113	CID (Collision Induced Dissociation)	MS2	12.4511	14.8	119.5	64.0421	13202	201015L_YASAM07425_YAII63-13.raw	F4.9	4436.28	3979.85	3753.5	3926.87	3543.42	5564.31	3849.44	3501.09	2073.26	2279.35	4189.17	3915.82	3097.53	5065.77	3741.39	3698.7		4.1	1	FALSE	0.0001042	2.105e-05
High	Unambiguous	[R].eDAPIGPHLQSMPSEQIR.[N]	N-Term(TMTpro)	1	Q14152	Q14152	0	3	0.5439	0	1	1	770.402	2309.19	2309.19	2.14	0.00165	CID (Collision Induced Dissociation)	MS2	43.2111	12.3	16.534	64.0383	13200	201015L_YASAM07425_YAII63-13.raw	F4.9	8059.04	4194.15	9328.39	9617.59	4077.62	11741.2	8692.33	7528.76	2639.93	6430.46	5880.35	10493.8	6550.94	10007.9	5363.72	5284.07		5.13	1	FALSE	0.0001042	2.544e-05
High	Unambiguous	[K].mDATANDVPSPYEVR.[G]	N-Term(TMTpro)	1	P30101	P30101	0	2	0.6184	0	1	1	984.987	1968.97	1968.97	0.57	0.00056	CID (Collision Induced Dissociation)	MS2	27.3628	17.1	119.5	64.0328	13198	201015L_YASAM07425_YAII63-13.raw	F4.9	4336.21	3441.5	4218.06	4205.05	3719.45	5229.27	5361.4	3463.95	1684.03	3648.42	4143.32	5346.72	3836	5876	4251.16	3198.03		3.59	1	FALSE	0.0001042	1.73e-05
High	Unambiguous	[K].mNVSPDVNYEELAR.[C]	N-Term(TMTpro); M1(Oxidation)	1	P17980	P17980	0	2	0.3082	0	1	1	978.987	1956.97	1956.97	0.07	7e-05	CID (Collision Induced Dissociation)	MS2	25.9987	16.7	119.5	63.9936	13182	201015L_YASAM07425_YAII63-13.raw	F4.9	4464.94	2401.76	5224.66	4740.89	3432.64	5481.81	4264.35	3495.83	1407.2	4319.86	4626.87	5228.52	4638.67	5119.01	4122.8	3367.15		3.05	1	FALSE	0.0001042	0.0002347
High	Unambiguous	[R].aAAEVNQDYGLDPk.[I]	N-Term(TMTpro); K14(TMTpro)	1	P07954	P07954	0	2	0.5804	0	1	1	1050.07	2099.12	2099.13	-0.9	-0.00095	CID (Collision Induced Dissociation)	MS2	39.4316	40.5	64.918	63.97	13173	201015L_YASAM07425_YAII63-13.raw	F4.9	9559.55	7931.99	11255	10901.2	8313.24	13409.1	13848	10336.6	3878.1	8167.29	11216.8	12983.9	9318.46	13714.7	10459.6	9232.85		3.98	1	FALSE	0.0001042	1.431e-06
High	Unambiguous	[K].iIEDQQESLNk.[W]	N-Term(TMTpro); K11(TMTpro)	1	P05455	P05455	0	3	0.1906	0	1	1	642.365	1925.08	1925.08	-0.85	-0.00055	CID (Collision Induced Dissociation)	MS2	9.52483	13.1	12.706	63.9446	13164	201015L_YASAM07425_YAII63-13.raw	F4.9	3442.63	2995.13	3399.68	2487.98	2943.87	4883.87	3839.05	3409.32	1250.15	2681.82	4370.82	3935.02	2180.76	3803.73	2893.96	2008.7		3.2	1	FALSE	0.0001042	0.0001961
High	Unambiguous	[R].nPSTVEAFDLAQSNSEHSR.[H]	N-Term(TMTpro)	1	O15067	O15067	0	3	0.5184	0	1	1	798.394	2393.17	2393.17	0.44	0.00035	CID (Collision Induced Dissociation)	MS2	13.7035	13	16.121	63.8956	13148	201015L_YASAM07425_YAII63-13.raw	F4.9	4322.13	4456.5	6256.93	5089.6	4595.25	4277.58	4427.1	4594.81	2075.52	4278.41	6132.7	4935.22	6314.31	5167.54	5063.07	3174.18		4.34	1	FALSE	0.0001042	1.075e-07
High	Unambiguous	[R].sVEGLQEGSVLR.[V]	N-Term(TMTpro)	1	O75153	O75153	0	2	0.4412	0	1	1	789.444	1577.88	1577.88	-0.18	-0.00014	CID (Collision Induced Dissociation)	MS2	14.0075	16.1	22.78	63.8466	13131	201015L_YASAM07425_YAII63-13.raw	F4.9	5215.92	4490.03	5275.96	4800.3	3507.77	4322.38	4495.65	4494.62	2182.63	2195.59	4275.03	4660.12	4734.64	5198.46	3641.22	3126.7		3.06	1	FALSE	0.0001042	0.0002457
High	Unambiguous	[R].nDLSPTTVMSEGAR.[N]	N-Term(TMTpro)	1	P30043	P30043	0	2	0.4296	0	1	1	891.455	1781.9	1781.9	0.68	0.00061	CID (Collision Induced Dissociation)	MS2	39.8133	25	117.674	63.8314	13127	201015L_YASAM07425_YAII63-13.raw	F4.9	5598.64	5531.72	6839.51	6396.81	4898.42	7942.77	8448.34	6352.73	3009.83	6810.42	7174.9	9059.27	6876.4	7546.77	6579.02	4706.02		2.77	1	FALSE	0.0001042	0.0002493
High	Unambiguous	[K].aTLELTHNWGTEDDETQSYHNGNSDPR.[G]	N-Term(TMTpro)	1	Q04760	Q04760	0	4	0.7725	0	1	1	848.639	3391.54	3391.54	-0.87	-0.00073	CID (Collision Induced Dissociation)	MS2	0	12.6	77.496	63.8183	13120	201015L_YASAM07425_YAII63-13.raw	F4.9	3167.15	3411.89	3293.48	3372.77	2834.67	3015.36	4757.55	3394.17	972.783	2932.41	4213.83	3413.67	4030.18	3906.64	2822.58	2727.86		4.44	1	FALSE	0.0001042	0.0003788
High	Unambiguous	[R].eSTGAQVQVAGDMLPNSTER.[A]	N-Term(TMTpro)	3	Q15366; Q15365	P57721; Q15366; Q15365	0	2	0.6764	0	1	1	1197.6	2394.19	2394.19	-0.82	-0.00098	CID (Collision Induced Dissociation)	MS2	10.9025	6	119.5	63.7919	13111	201015L_YASAM07425_YAII63-13.raw	F4.9	1214.43	1816.5	1318.66	1799.04	1521.22	1889.73	1138.39	1746.77	806.019	817.401	1768.14	1485.56	1782.68	2006.16	1026.96	1746.83		6.18	2	FALSE	0.0001042	2.466e-08
High	Unambiguous	[K].aEAGAGSATEFQFR.[G]	N-Term(TMTpro)	2	P46783	P46783; Q9NQ39	0	2	0.6329	0	1	1	873.443	1745.88	1745.88	0.32	0.00028	CID (Collision Induced Dissociation)	MS2	13.0262	37.1	25.158	63.7868	13108	201015L_YASAM07425_YAII63-13.raw	F4.9	8810.34	8878.99	11229.8	10503.9	6831.4	10808.9	11190.8	8033.79	3582.45	7532.46	11316.3	11104.5	10041.8	11474.1	9373.54	6516.35		4.93	1	FALSE	0.0001042	1.548e-07
High	Unambiguous	[R].sELHIENLNmEADPGQYR.[C]	N-Term(TMTpro); M10(Oxidation)	1	P35613	P35613	0	3	0.5547	0	1	1	812.73	2436.18	2436.18	-1.26	-0.00102	CID (Collision Induced Dissociation)	MS2	35.1956	20.1	15.757	63.7732	13103	201015L_YASAM07425_YAII63-13.raw	F4.9	5083.6	4582.27	6719.53	4882.52	5904.5	7550.78	7891.66	6057.64	1857.59	4460.77	5140.55	9901.35	6167.38	8187.55	5252.66	3601.75		3.84	1	FALSE	0.0001042	1.081e-05
High	Unambiguous	[R].sQTEAVTFLANHDDSR.[A]	N-Term(TMTpro)	1	Q9Y2S7	Q9Y2S7	0	3	0.6228	0	1	1	699.018	2095.04	2095.04	0.23	0.00016	CID (Collision Induced Dissociation)	MS2	44.597	10.9	17.273	63.7704	13102	201015L_YASAM07425_YAII63-13.raw	F4.9	3531.62	2106.97	2296.76	3120.93	2649.82	3072.71	2641.34	2952.02	1038.52	2756.15	3068.83	4793.38	3153.29	3456.36	1909.45	2681.88		4.56	1	FALSE	0.0001042	8.806e-05
High	Unambiguous	[K].eLTAPDENIPAk.[I]	N-Term(TMTpro); K12(TMTpro)	1	P11387	P11387	0	2	0.4548	0	1	1	953.541	1906.08	1906.08	-1.36	-0.0013	CID (Collision Induced Dissociation)	MS2	52.8113	28.6	74.27	64.1317	13231	201015L_YASAM07425_YAII63-13.raw	F4.9	5928.08	5829.17	8220.41	7301.18	6541.15	9299.46	9018.54	7268.59	2419.43	7212.05	8619.98	8754.57	6030.53	8206.3	6846.1	5049.6		3.54	1	FALSE	0.0001042	8.889e-05
High	Unambiguous	[K].iLDQGEDFPASEmTR.[I]	N-Term(TMTpro); M13(Oxidation)	1	P30040	P30040	0	2	0.5461	0	1	1	1015	2028.99	2028.99	0.48	0.00049	CID (Collision Induced Dissociation)	MS2	9.48739	17.1	73.76	66.5956	13964	201015L_YASAM07425_YAII63-13.raw	F4.9	3153.62	4287.09	4958.07	4610.47	2779.07	6011.77	4416.34	4328.03	2363.47	5449.8	4664.69	4685.81	4903.25	5246.05	3695.24	3168.09		4.01	1	FALSE	0.0001042	0.0001746
High	Unambiguous	[K].yGQHPPDAVDEPQMLTNEk.[L]	N-Term(TMTpro); K19(TMTpro)	1	P26358	P26358	0	3	0.6452	0	1	1	926.473	2777.41	2777.41	-0.07	-7e-05	CID (Collision Induced Dissociation)	MS2	8.64104	19.6	74.283	64.145	13236	201015L_YASAM07425_YAII63-13.raw	F4.9	3948.38	3891.28	4635.6	5237.96	3763.81	7725.8	5997.47	4966.61	2103.23	2849.32	5443.76	6991.62	5880.5	6860.99	5361.91	3308.65		6.2	1	FALSE	0.0001042	1.689e-06
High	Unambiguous	[K].lENLEPEHEYk.[C]	N-Term(TMTpro); K11(TMTpro)	1	P08575	P08575	0	3	0.4274	0	1	1	670.367	2009.09	2009.08	1.64	0.0011	CID (Collision Induced Dissociation)	MS2	73.686	15.6	11.529	64.1981	13256	201015L_YASAM07425_YAII63-13.raw	F4.9	4587.4	5019.15	7528.7	6016.53	5206.92	7898.07	8122.22	5505.08	1668.29	6117.77	8008.23	7404.58	7591.17	7763.36	6826.56	2844.66		3.51	1	FALSE	0.0001042	3.741e-05
High	Unambiguous	[R].tTPSYVAFTDTER.[L]	N-Term(TMTpro)	6	P11142; P0DMV9	P48741; P17066; P54652; P11142; P0DMV9; P34931	0	3	0.5379	0	1	1	597.975	1791.91	1791.91	0.89	0.00053	CID (Collision Induced Dissociation)	MS2	19.0866	10.7	13.776	64.6214	13405	201015L_YASAM07425_YAII63-13.raw	F4.9	2771.19	2454.61	3747.82	4249.36	2903.49	3968.1	2997.87	3375.86	1507.61	3336.36	3348.32	2925.1	2992.81	3548.19	2823.62	2059.1		3.96	2	FALSE	0.0001042	0.0003044
High	Unambiguous	[K].hNDDEQYAWESSAGGSFTVR.[TA]	N-Term(TMTpro)	3	P07900; P08238	P07900; P08238; Q14568	0	2	0.892	0	1	1	1280.59	2560.16	2560.17	-1.01	-0.0013	CID (Collision Induced Dissociation)	MS2	0	6.2	119.5	64.584	13391	201015L_YASAM07425_YAII63-13.raw	F4.9	1763.54	1152.53	2121.91	1509.79	1806.5	1971.66	1403.18	1407.36	664.074	1131.53	1365.78	1290.7	2190.55	1715.34	2709.82	869.676		6.02	2	FALSE	0.0001042	2.776e-05
High	Unambiguous	[K].fEGEPATHTQPGVQLQSNTYDLQESNVR.[L]	N-Term(TMTpro)	1	Q14141	Q14141	0	3	0.6071	0	1	1	1150.57	3449.69	3449.69	0.9	0.00103	CID (Collision Induced Dissociation)	MS2	0	4.3	119.5	64.5653	13384	201015L_YASAM07425_YAII63-13.raw	F4.9	629.981	821.55	1189.9	1105.1	840.463	1671.12	1092.11	1010.08	474.583	918.998	1685.78	1464.56	729.292	1395.47	1269.34	1266.14		7.61	1	FALSE	0.0001042	3.872e-08
High	Unambiguous	[K].gDVENIEVVQk.[M]	N-Term(TMTpro); K11(TMTpro)	1	P42704	P42704	0	2	0.4855	0	1	1	919.529	1838.05	1838.05	-0.5	-0.00046	CID (Collision Induced Dissociation)	MS2	14.8428	58.4	58.012	64.5532	13380	201015L_YASAM07425_YAII63-13.raw	F4.9	14910.8	12001.6	17611	17710.8	12268.2	21244	20530.8	16879.6	4475.28	11903.7	16005.4	19647.9	17578.9	20027	15182.9	12758.1		4.47	1	FALSE	0.0001042	0.000141
High	Unambiguous	[K].nDQDTWDYTNPNLSGQGDPGSNPNk.[R]	N-Term(TMTpro); K25(TMTpro)	1	P14866	P14866	0	4	0.6907	0	1	1	836.4	3342.58	3342.58	0.26	0.00021	CID (Collision Induced Dissociation)	MS2	18.6152	13.9	73.346	64.5165	13371	201015L_YASAM07425_YAII63-13.raw	F4.9	4373.98	2017.77	4251.13	2958.02	3459.05	3925.63	5138.31	2723.57	1510.33	2622.26	4686.46	4596.5	3790.9	4256.26	4129.99	2624.79		5.14	1	FALSE	0.0001042	4.738e-06
High	Unambiguous	[R].nQYDNDVTVWSPQGR.[I]	N-Term(TMTpro)	1	P25786	P25786	0	2	0.6634	0	1	1	1042.01	2083.02	2083.02	0	0	CID (Collision Induced Dissociation)	MS2	0	9.4	73.55	64.4877	13360	201015L_YASAM07425_YAII63-13.raw	F4.9	2301.92	2361.35	2432.05	2484.07	2613.97	3434.99	2762.7	1719.65		2645.86	2514.79	2833.35	2945.6	2551.62	1991.08	2368.54		5.14	1	FALSE	0.0001042	3.337e-06
High	Unambiguous	[K].hNDDEQYAWESSAGGSFTVR.[TA]	N-Term(TMTpro)	3	P07900; P08238	P07900; P08238; Q14568	0	3	0.7563	0	1	1	854.059	2560.16	2560.17	-1.07	-0.00091	CID (Collision Induced Dissociation)	MS2	12.2942	15.7	21.241	64.4853	13359	201015L_YASAM07425_YAII63-13.raw	F4.9	3466.74	3890.86	4534.06	3755.31	3357.99	5642.52	5019.78	3718.58	1793.32	3954.76	4210.76	4932.07	3594.22	5355.46	3926.47	3170.11		6.36	2	FALSE	0.0001042	1.335e-07
High	Unambiguous	[K].vESLDVDSEAk.[K]	N-Term(TMTpro); K11(TMTpro)	1	P49321	P49321	0	2	0.3881	0	1	1	900.497	1799.99	1799.99	-0.28	-0.00025	CID (Collision Induced Dissociation)	MS2	13.3657	25	108.773	64.4566	13348	201015L_YASAM07425_YAII63-13.raw	F4.9	5178.35	5207.62	7631.99	5851.96	5009.94	8530.99	8496.98	6802.48	1421.61	5521.41	6510.94	8992.06	6581.25	8371.88	7258.77	3148.15		3.53	1	FALSE	0.0001042	0.0002608
High	Unambiguous	[R].gISHVIVDEIHER.[D]	N-Term(TMTpro)	1	Q08211	Q08211	0	3	0.4569	0	1	1	603.339	1808	1808	1.52	0.00092	CID (Collision Induced Dissociation)	MS2	10.1438	4.4	14.854	64.4456	13344	201015L_YASAM07425_YAII63-13.raw	F4.9	3174.92	3350.66	2709.39	3051.21	2096.1	4157.71	2930.11		1425.9	2813.72	5106.18	2207.29	3855.24	4092.12	2918.15	1291.7		3.94	1	FALSE	0.0001042	7.178e-07
High	Unambiguous	[K].gEENLMDAQVk.[A]	N-Term(TMTpro); K11(TMTpro)	1	P50990	P50990	0	2	0.4887	0	1	1	921.499	1841.99	1841.99	-0.42	-0.00038	CID (Collision Induced Dissociation)	MS2	5.24843	53.9	33.203	64.4133	13328	201015L_YASAM07425_YAII63-13.raw	F4.9	11296.3	10562.3	13163.4	15164.8	8862.99	18460.5	21271.3	13996	3372.63	10036.4	14580.7	17324.2	14075.6	18437.2	15126.9	10088.3		3.99	1	FALSE	0.0001042	0.0001041
High	Unambiguous	[K].vVGDVAYDEAk.[E]	N-Term(TMTpro); K11(TMTpro)	1	P11586	P11586	0	2	0.5	0	1	1	887.497	1773.99	1773.99	-0.96	-0.00085	CID (Collision Induced Dissociation)	MS2	68.3698	43.4	71.531	64.3976	13323	201015L_YASAM07425_YAII63-13.raw	F4.9	9779.99	7528.67	12782.7	9788.8	7877.05	18991.4	19818.2	10169.7	2458.32	5889.16	11067.3	21110.4	11409.6	17290.8	8375.53	8053.4		3.26	1	FALSE	0.0001042	6.09e-05
High	Unambiguous	[R].nVSSFPDDATSPLQENR.[N]	N-Term(TMTpro)	1	P52292	P52292	0	2	0.6475	0	1	1	1091.04	2181.07	2181.07	-1.36	-0.00148	CID (Collision Induced Dissociation)	MS2	0	10.4	119.5	64.3926	13321	201015L_YASAM07425_YAII63-13.raw	F4.9	2570.53	1658.37	3148.05	2683.75	2146.95	2822.67	3066.69	1914.83	1386.6	2767.85	3789.38	3777.12	2704.98	2601.24	2553.11	1808.9		4.34	1	FALSE	0.0001042	7.595e-07
High	Unambiguous	[K].gAEEmETVIPVDVmR.[R]	N-Term(TMTpro); M5(Oxidation); M14(Oxidation)	1	Q99497	Q99497	0	2	0.5776	0	1	1	1006.5	2012	2012	-0.68	-0.00068	CID (Collision Induced Dissociation)	MS2	0	18.4	73.82	64.3594	13310	201015L_YASAM07425_YAII63-13.raw	F4.9	4615.85	3873.66	4686.7	4633.26	3772.04	4911.19	5177.48	3998.85	2694.74	4317.29	5051.78	6496.07	4907.18	4974.95	4279.52	4514.72		3.22	1	FALSE	0.0001042	0.0001046
High	Unambiguous	[R].tTPSYVAFTDTER.[L]	N-Term(TMTpro)	6	P11142; P0DMV9	P48741; P17066; P54652; P11142; P0DMV9; P34931	0	2	0.6451	0	1	1	896.458	1791.91	1791.91	0.18	0.00017	CID (Collision Induced Dissociation)	MS2	26.8889	28.5	35.323	64.3246	13298	201015L_YASAM07425_YAII63-13.raw	F4.9	7057.26	5777.83	6964.74	7014.77	7419.5	9841.52	6631.45	5550.58	3401.22	6520.94	6959.89	10919.4	8293.03	8666.12	7768.1	5644.37		3.86	2	FALSE	0.0001042	2.173e-06
High	Unambiguous	[K].vHVGDEDFVHLR.[V]	N-Term(TMTpro)	1	P04080	P04080	0	4	0.5604	0	1	1	432.486	1726.92	1726.92	1.76	0.00076	CID (Collision Induced Dissociation)	MS2	33.6702		25.064	64.2185	13265	201015L_YASAM07425_YAII63-13.raw	F4.9																		3.23	1	FALSE	0.0001042	0.0001036
High	Unambiguous	[K].nDQDTWDYTNPNLSGQGDPGSNPNk.[R]	N-Term(TMTpro); K25(TMTpro)	1	P14866	P14866	0	3	0.7759	0	1	1	1114.86	3342.58	3342.58	0.72	0.0008	CID (Collision Induced Dissociation)	MS2	0	7.4	119.5	64.1755	13247	201015L_YASAM07425_YAII63-13.raw	F4.9	1937.66	1107.41	2463.74	1835.03	1719.63	2547.28	2369.38	1271.41	749.599	1517.35	2166.03	2755.68	1706.25	2485.43	1665.21	789.3		6.38	1	FALSE	0.0001042	3.574e-08
High	Unambiguous	[R].eALLSSAVDHGSDEVk.[F]	N-Term(TMTpro); K16(TMTpro)	1	P78371	P78371	0	3	0.5594	0	1	1	755.746	2265.22	2265.22	0.93	0.0007	CID (Collision Induced Dissociation)	MS2	15.7194	17.1	23.756	66.6071	13967	201015L_YASAM07425_YAII63-13.raw	F4.9	3311.11	3879.1	4325.84	4781.83	3162.72	6719.25	6001.26	4951.51	1732.1	3699.08	4823.29	5753.14	4836.43	4791.5	4475.06	2500.29		5.81	1	FALSE	0.0001042	5.836e-09
High	Unambiguous	[K].tYGADLASVDFQHASEDAR.[K]	N-Term(TMTpro)	1	P30740	P30740	0	3	0.5329	0	1	1	786.381	2357.13	2357.13	-1.52	-0.00119	CID (Collision Induced Dissociation)	MS2	40.2642	20.2	29.179	66.6771	13984	201015L_YASAM07425_YAII63-13.raw	F4.9	4732.99	3644.52	5466.17	4742.63	2766.8	6903.08	6544.27	5586.97	1482.15	3768.36	5141.12	7280.56	6319.71	7073.44	5110.11	3211.6		5.01	1	FALSE	0.0001042	1.816e-06
High	Unambiguous	[R].sLETENSALQLQVTER.[E]	N-Term(TMTpro)	1	P20700	P20700	0	3	0.4558	0	1	1	708.049	2122.13	2122.13	0.91	0.00065	CID (Collision Induced Dissociation)	MS2	23.7278	6.1	9.716	66.7036	13990	201015L_YASAM07425_YAII63-13.raw	F4.9	2652.32	3062.48	2798.16	1616.85	2863.94	3514.31	2812.09	1506.93	998.177	2758.07	2209.14	2157.17	1430.57	3100.16	1012.6	1487.32		5.2	1	FALSE	0.0001042	1.162e-06
High	Unambiguous	[R].aWDQEAEGAGPELGLR.[V]	N-Term(TMTpro)	1	Q8IZ83	Q8IZ83	0	2	0.5294	0	1	1	1002.01	2003.01	2003.02	-0.87	-0.00087	CID (Collision Induced Dissociation)	MS2	39.6198	11.7	119.5	69.0291	14589	201015L_YASAM07425_YAII63-13.raw	F4.9	2092.51	2143.36	3026.17	3227.42	3327.34	4189.36	3706.44	3302.05	1079.82	2784.45	2934.31	3540.48	2360.56	3410.45	3047.91	2666.86		4.25	1	FALSE	0.0001042	2.108e-05
High	Unambiguous	[R].sIQEAPVSEDLVIR.[L]	N-Term(TMTpro)	1	Q5JTV8	Q5JTV8	0	2	0.4904	0	1	1	930.523	1860.04	1860.04	-0.28	-0.00026	CID (Collision Induced Dissociation)	MS2	6.60805	21.3	32.642	68.8849	14557	201015L_YASAM07425_YAII63-13.raw	F4.9	6143.38	4979.34	5880.65	5930.28	4733.93	6722.25	7267.4	5271.39	3104.91	4979.25	5497.59	6738.3	5591.33	5962.81	4379.48	4340.97		4.71	1	FALSE	0.0001042	4.372e-05
High	Unambiguous	[R].dVVIcPDASLEDAk.[K]	N-Term(TMTpro); C5(Carbamidomethyl); K14(TMTpro)	1	Q99497	Q99497	0	2	0.6157	0	1	1	1070.58	2140.14	2140.15	-0.95	-0.00101	CID (Collision Induced Dissociation)	MS2	9.18582	16.6	73.31	68.834	14544	201015L_YASAM07425_YAII63-13.raw	F4.9	3990.61	2965.39	5017.06	3323.18	2671.26	6060.59	6615.35	4734.76	1266.77	2570.18	4509.15	5199.89	5006.24	7127.98	5056.12	2551.13		5.36	1	FALSE	0.0001042	1.046e-05
High	Unambiguous	[K].sLEDQVEMLR.[T]	N-Term(TMTpro)	1	P14314	P14314	0	2	0.3655	0	1	1	762.407	1523.81	1523.81	0.3	0.00023	CID (Collision Induced Dissociation)	MS2	46.4064	12.6	17.121	68.8315	14543	201015L_YASAM07425_YAII63-13.raw	F4.9	3452.18	2828.33	3191.85	2913.42	2189.37	3740.11	4230.87	2446.63	1807.29	2724.8	3451.83	4269.61	3829.86	3992.58	3943.93	2498.77		3.42	1	FALSE	0.0001042	0.000228
High	Unambiguous	[K].lEVEANNAFDQYR.[D]	N-Term(TMTpro)	1	P47756	P47756	0	2	0.4974	0	1	1	936.975	1872.94	1872.94	0.97	0.00091	CID (Collision Induced Dissociation)	MS2	16.8743	22.9	98.182	68.805	14534	201015L_YASAM07425_YAII63-13.raw	F4.9	4656.91	4249.07	8104.64	6277.74	5265.67	5649.15	6496.65	5083.79	2061.7	6484.56	8224.19	7411.25	6847.35	5635.33	4236.7	3645.11		3.92	1	FALSE	0.0001042	5.655e-05
High	Unambiguous	[K].vIEEQLEPAVEk.[I]	N-Term(TMTpro); K12(TMTpro)	1	P42704	P42704	0	2	0.4158	0	1	1	996.579	1992.15	1992.15	0.33	0.00033	CID (Collision Induced Dissociation)	MS2	17.6888	30	75.394	68.7915	14530	201015L_YASAM07425_YAII63-13.raw	F4.9	7004.82	6368.8	9010.74	8349.82	7349.02	9784.06	10401.8	7498.9	1914.11	5961.14	8163.26	10759.7	7930.52	9558.66	8671.81	4464.88		4.81	1	FALSE	0.0001042	1.352e-05
High	Unambiguous	[K].vQALEEANNDLENk.[I]	N-Term(TMTpro); K14(TMTpro)	4	P35527	547748; 1890020; 1082558; P35527	0	3	0.4422	0	1	1	732.399	2195.18	2195.18	1.29	0.00094	CID (Collision Induced Dissociation)	MS2	15.5924	3.6	46.96	69.0963	14610	201015L_YASAM07425_YAII63-13.raw	F4.9	1534.11	736.473	1191	798.28	1446.99	1562.25	934.853	1071.36			1662.67	2172.99		955.087	1386.38	953.21		3.89	1	TRUE	0.0001042	5.578e-05
High	Unambiguous	[K].nLSSNEAISLEEIR.[I]	N-Term(TMTpro)	1	P78527	P78527	0	2	0.4767	0	1	1	940.009	1879.01	1879.01	0.85	0.0008	CID (Collision Induced Dissociation)	MS2	38.1765	45.9	34.144	68.744	14519	201015L_YASAM07425_YAII63-13.raw	F4.9	11196.3	10679.3	12155.6	12314.4	9609.99	13533.8	12383	10880	6218.96	13797.2	14861.5	14479.8	12786.7	13360.4	11159.8	10912.7		4.51	1	FALSE	0.0001042	3.984e-06
High	Unambiguous	[K].aLEEGLTPQEIcDk.[Y]	N-Term(TMTpro); C12(Carbamidomethyl); K14(TMTpro)	1	P56192	P56192	0	2	0.4712	0	1	1	1106.09	2211.18	2211.18	-0.37	-0.0004	CID (Collision Induced Dissociation)	MS2	33.7192	13.4	119.5	68.6963	14506	201015L_YASAM07425_YAII63-13.raw	F4.9	3223.16	3191.02	3836.26	3228.12	3378.39	4859.41	3403.77	3363.96	1097.15	2386.73	2793.02	3996.23	3698.4	4271.17	3847.8	2160.87		4.86	1	FALSE	0.0001042	2.027e-05
High	Unambiguous	[R].mAEIGEHVAPSEAANSLEQAQAAAER.[L]	N-Term(TMTpro)	1	P27708	P27708	0	3	0.6626	0	1	1	995.494	2984.47	2984.47	-1.18	-0.00117	CID (Collision Induced Dissociation)	MS2	16.0964	11.7	97.473	68.6301	14484	201015L_YASAM07425_YAII63-13.raw	F4.9	2559.6	2359.4	3205.91	3081.23	3251.08	3544.48	3652.98	3506.64	1240.36	3455.66	2571.01	3307.48	3070.06	3741.68	2202.18	2066.74		6.55	1	FALSE	0.0001042	8.671e-10
High	Unambiguous	[R].gLGLDDALEPR.[Q]	N-Term(TMTpro)	1	Q9Y230	Q9Y230	0	2	0.5234	0	1	1	730.409	1459.81	1459.81	1.65	0.00121	CID (Collision Induced Dissociation)	MS2	43.4848	8.1	37.35	68.5657	14466	201015L_YASAM07425_YAII63-13.raw	F4.9	2096.2	1821.55	1950.78	2515.77	1263.96	2607.05	2104.33	2369.21	1126.82	2113.67	1880.85	2195.05	2306.5	2017.29	1900.12	2180.64		3.42	1	FALSE	0.0001042	0.0003045
High	Unambiguous	[R].nPDDITQEEYGEFYk.[S]	N-Term(TMTpro); K15(TMTpro)	1	P08238	P08238	0	2	0.6641	0	1	1	1228.61	2456.21	2456.21	0.76	0.00094	CID (Collision Induced Dissociation)	MS2	0	10.2	119.5	68.5623	14465	201015L_YASAM07425_YAII63-13.raw	F4.9	1865.47	2190.79	3178.4	3239.57	1612.99	3603.5	3745.23	1893.65		1952.06	2908.9	3286.25	2952.12	4272.6	3536.4	1942.05		5.21	1	FALSE	0.0001042	2.376e-07
High	Unambiguous	[K].lESEMEDAYHEHQANLLR.[Q]	N-Term(TMTpro)	1	P23246	P23246	0	4	0.6667	0	1	1	623.058	2489.21	2489.2	2.64	0.00164	CID (Collision Induced Dissociation)	MS2	0		45.415	68.5184	14452	201015L_YASAM07425_YAII63-13.raw	F4.9																		4.41	1	FALSE	0.0001042	1.131e-07
High	Unambiguous	[K].fEDYLNAESR.[V]	N-Term(TMTpro)	1	Q16181	Q16181	0	2	0.5967	0	1	1	774.386	1547.77	1547.77	-0.51	-0.0004	CID (Collision Induced Dissociation)	MS2	36.0333	10.2	24.763	68.4768	14440	201015L_YASAM07425_YAII63-13.raw	F4.9	2756.83	2020.7	3464.04	2179.27	2325.65	2373.13	2481.04	2754.83	754.575	2602.18	2525.92	3745.55	3251.3	3979.43	2605.83	1990.38		3.62	1	FALSE	0.0001042	0.0002235
High	Unambiguous	[K].vLAVNQENEHLMEDYEk.[L]	N-Term(TMTpro); K17(TMTpro)	1	O43707	O43707	0	3	0.4529	0	1	1	890.466	2669.38	2669.37	3.27	0.00291	CID (Collision Induced Dissociation)	MS2	23.9396	28.4	31.072	68.6997	14507	201015L_YASAM07425_YAII63-13.raw	F4.9	6665.52	5805.09	7030.14	6951.74	6011.97	10047.5	9540.55	6457.12	2361.64	5172.33	7016.37	10794.3	7352.4	9575.63	7063.29	5300.14		4.35	1	FALSE	0.0001042	2.456e-05
High	Unambiguous	[K].vQALEEANNDLENk.[I]	N-Term(TMTpro); K14(TMTpro)	4	P35527	547748; 1890020; 1082558; P35527	0	2	0.606	0	1	1	1098.09	2195.18	2195.18	0.57	0.00063	CID (Collision Induced Dissociation)	MS2	15.558	10.6	119.5	69.1005	14612	201015L_YASAM07425_YAII63-13.raw	F4.9	1808.72	2053.58	3760.94	3205.83	1834.91	2227.87	2175.29	2145.27	868.886	2477.31	5350.47	4016.82	2296.32	4074.23	2792.97	537.272		5.66	1	TRUE	0.0001042	5.329e-08
High	Unambiguous	[R].iLGADTSVDLEETGR.[V]	N-Term(TMTpro)	1	P25705	P25705	0	2	0.4442	0	1	1	940.503	1880	1879.99	2.8	0.00263	CID (Collision Induced Dissociation)	MS2	14.5054	21.7	64.619	69.1407	14621	201015L_YASAM07425_YAII63-13.raw	F4.9	4422.81	4601.5	5767.03	6931.53	5849.11	6650.73	6426.69	5532.2	2836.28	5177.33	7094.57	7258.29	5143.17	8308.66	4772.77	4735.14		4.21	1	FALSE	0.0001042	8.76e-06
High	Unambiguous	[R].aPWIEQERPEYWDQETR.[N]	N-Term(TMTpro)	2	P16188	P16188; P16189	0	3	0.4455	0	1	1	846.418	2537.24	2537.24	0.09	8e-05	CID (Collision Induced Dissociation)	MS2	28.5411	13.6	36.465	69.1453	14623	201015L_YASAM07425_YAII63-13.raw	F4.9	3660.19	3205.11	4175.67	3123.8	2444.12	4673.8	3179.07	2485.21	1985.94	3119.31	4533.56	3988.95	3944.38	4344.68	3594.05	2215.53		4.04	1	FALSE	0.0001042	0.0001277
High	Unambiguous	[K].aGQAVDDFIEk.[L]	N-Term(TMTpro); K11(TMTpro)	1	P52209	P52209	0	2	0.4454	0	1	1	901.002	1801	1801	-0.69	-0.00062	CID (Collision Induced Dissociation)	MS2	17.0324	20.9	74.69	69.8265	14795	201015L_YASAM07425_YAII63-13.raw	F4.9	4131.79	3955.48	5388.24	5182.22	4318.51	7956.22	6560.79	5108.88	2195.62	4139.15	5357.77	6442.78	5179.01	7500.8	7463.9	3038.28		3.66	1	FALSE	0.0001042	4.001e-05
High	Unambiguous	[K].aVSDWIDEQEk.[G]	N-Term(TMTpro); K11(TMTpro)	1	Q12906	Q12906	0	2	0.4242	0	1	1	964.518	1928.03	1928.03	1.33	0.00128	CID (Collision Induced Dissociation)	MS2	11.3062	33.3	74.18	69.8118	14790	201015L_YASAM07425_YAII63-13.raw	F4.9	6906.51	7378.37	8548.78	6988.98	6217.33	10341	10979.9	5128.6	3921.68	7266.35	7870.47	12051.5	9035.89	10800.8	10656.2	6104.29		4.22	1	FALSE	0.0001042	2.608e-05
High	Unambiguous	[K].gAEEmETVIPVDVMR.[R]	N-Term(TMTpro); M5(Oxidation)	1	Q99497	Q99497	0	2	0.2747	0	1	1	998.507	1996.01	1996.01	1.17	0.00117	CID (Collision Induced Dissociation)	MS2	0	27.1	53.003	69.7975	14785	201015L_YASAM07425_YAII63-13.raw	F4.9	4607.22	2780.29	7666.43	6993.73	6034.8	6838.84	20309.1	6691.32	3675.92	5246.64	8124.18	6919.55	4751.72	7314.85	6658.18	4264.22		3.75	1	FALSE	0.0001042	0.0001463
High	Unambiguous	[K].gDEEGVPAVVIDmSGLR.[E]	N-Term(TMTpro); M13(Oxidation)	1	P13796	P13796	0	2	0.4935	0	1	1	1032.54	2064.06	2064.06	1.24	0.00128	CID (Collision Induced Dissociation)	MS2	13.4834	16.9	73.61	69.6873	14759	201015L_YASAM07425_YAII63-13.raw	F4.9	4663.26	3600.72	3853.54	4334.34	3890.02	5200.34	5142	4553.02	1337.11	3117.18	5368.01	5187.51	4584.31	4865.42	5089.78	2886.46		3.85	1	FALSE	0.0001042	4.509e-07
High	Unambiguous	[R].gVVDSEDIPLNLSR.[E]	N-Term(TMTpro)	1	Q12931	Q12931	0	2	0	0	1	1	909.501	1817.99	1817.99	0.89	0.00081	CID (Collision Induced Dissociation)	MS2	20.6846	20	45.222	69.5657	14732	201015L_YASAM07425_YAII63-13.raw	F4.9	4561.16	3134.84	4777.76	4769.55	4706.55	4274.7	5063.72	5645.51	2919.01	5185.87	5697.44	6262.27	5265.3	6085.05	5739.98	4528.29		3.22	1	FALSE	0.0001042	5.962e-05
High	Unambiguous	[K].tAVVVGTITDDVR.[V]	N-Term(TMTpro)	1	Q07020	Q07020	0	2	0.4952	0	1	1	825.473	1649.94	1649.94	0.19	0.00015	CID (Collision Induced Dissociation)	MS2	37.1231	14.4	65.604	69.5222	14723	201015L_YASAM07425_YAII63-13.raw	F4.9	2713.89	3955.71	4794.17	4907.05	3227.69	3693.99	3256.74	3458.08	1761.34	3166.93	3562.67	4341.38	4256.77	3451.4	3694.82	2622.77		4.2	1	FALSE	0.0001042	0.0002329
High	Unambiguous	[K].gVVPLAGTDGETTTQGLDGLSER.[C]	N-Term(TMTpro)	1	P09972	P09972	0	3	0.4628	0	1	1	859.784	2577.34	2577.33	1.91	0.00164	CID (Collision Induced Dissociation)	MS2	37.6415	14.6	32.253	69.4579	14708	201015L_YASAM07425_YAII63-13.raw	F4.9	3670.99	3062.26	4604.26	4986.13	2527.01	3965.46	3981.85	2261.82	1667.68	2984.92	4859.87	5305.03	2914.5	4391.5	4355.68	2040.18		4.43	1	FALSE	0.0001042	2.027e-05
High	Unambiguous	[K].lLSSEDIEGMR.[L]	N-Term(TMTpro)	1	P53582	P53582	0	2	0.4426	0	1	1	777.413	1553.82	1553.82	1.43	0.00111	CID (Collision Induced Dissociation)	MS2	19.8346	9.9	63.249	69.4435	14704	201015L_YASAM07425_YAII63-13.raw	F4.9	2814.28	2026.59	3137.35	2361.54	1954.67	3089.82	2807.48	2537.15	628.759	2524.87	2519.54	3105.92	3064.5	2864.34	1822.51	1688.79		3.05	1	FALSE	0.0001042	0.0002962
High	Unambiguous	[K].vEDVSAVEIVGGATR.[I]	N-Term(TMTpro)	1	Q92598	Q92598	0	2	0.4582	0	1	1	903.5	1805.99	1805.99	-0.11	-0.0001	CID (Collision Induced Dissociation)	MS2	8.41721	19.3	108.544	69.4198	14697	201015L_YASAM07425_YAII63-13.raw	F4.9	4757.93	5667.47	5633.53	5362.7	4201.78	5958.68	6292.32	4991.81	1205.99	3950.02	6007.2	5000.96	5141.77	5543.04	4680.74	3020.66		2.99	1	FALSE	0.0001042	4.011e-06
High	Unambiguous	[K].gVVPLAGTDGETTTQGLDGLSER.[C]	N-Term(TMTpro)	1	P09972	P09972	0	2	0.7545	0	1	1	1289.17	2577.34	2577.33	1.46	0.00188	CID (Collision Induced Dissociation)	MS2	0	5.4	119.5	69.4078	14694	201015L_YASAM07425_YAII63-13.raw	F4.9	1499.2	849.204	1863.87	1309.22	1470.7	1090.24	1598.81	978.07	710.509	1205.07	1956.85	1462.25	1005.88	2035.56	1025.87	1477.28		5.5	1	FALSE	0.0001042	3.429e-08
High	Unambiguous	[K].tASGDYIDSSWELR.[V]	N-Term(TMTpro)	1	Q86UX7	Q86UX7	0	2	0.4944	0	1	1	952.471	1903.93	1903.94	-0.88	-0.00084	CID (Collision Induced Dissociation)	MS2	11.8514	19.3	90.278	69.3592	14682	201015L_YASAM07425_YAII63-13.raw	F4.9	5340.12	5009.63	4221.81	6491.39	4252.88	5976.82	4842.62	4023.45	2472.08	4768.24	5622.76	5739.45	5717.51	4454.94	4531.45	4569.59		3.6	1	FALSE	0.0001042	1.499e-05
High	Unambiguous	[K].eSEDFIVEQYk.[H]	N-Term(TMTpro); K11(TMTpro)	1	Q14566	Q14566	0	2	0.4111	0	1	1	998.033	1995.06	1995.06	0.7	0.00069	CID (Collision Induced Dissociation)	MS2	47.5855	40.4	93.335	69.3425	14676	201015L_YASAM07425_YAII63-13.raw	F4.9	5680.97	5773.72	8712.15	8950.63	6093.18	10932.5	35516.9	9553.91	4602.66	6252.94	8194.73	12514	9525.28	10365.5	8881.47	6831.46		3.6	1	FALSE	0.0001042	0.0002042
High	Unambiguous	[K].dDANNDPQWSEEQLIAAk.[F]	N-Term(TMTpro); K18(TMTpro)	1	P22234	P22234	0	2	0.7115	0	1	1	1326.68	2652.34	2652.34	1.27	0.00169	CID (Collision Induced Dissociation)	MS2	0	7.7	119.5	69.3009	14664	201015L_YASAM07425_YAII63-13.raw	F4.9	1312.61	1508.3	1998.44	1681.03	581.338	4672.91	2653.88	1869.48		1477.71	1821.89	4145.21	1682.99	2841.7	2171.61	1073.83		5.2	1	FALSE	0.0001042	1.336e-05
High	Unambiguous	[KR].sYELPDGQVITIGNER.[F]	N-Term(TMTpro)	10	P60709; P68133; Q562R1	A5A3E0; P63267; Q9BYX7; P60709; Q6S8J3; P62736; P68133; Q562R1; P68032; P63261	0	2	0.5749	0	1	1	1048.05	2095.1	2095.1	-0.07	-7e-05	CID (Collision Induced Dissociation)	MS2	57.0299	20.9	119.5	69.2906	14660	201015L_YASAM07425_YAII63-13.raw	F4.9	5086.93	3741.6	5369.04	5233.64	4457.52	5515.54	5650.69	5161.95	3276.02	4477.63	4984.53	6426	6547.5	7332.32	5521.93	3761.84		4.94	3	FALSE	0.0001042	1.144e-05
High	Unambiguous	[R].yGVIILDEAHER.[T]	N-Term(TMTpro)	1	O43143	O43143	0	3	0.5877	0	1	1	573.652	1718.94	1718.94	0.9	0.00052	CID (Collision Induced Dissociation)	MS2	0		30.197	69.2213	14642	201015L_YASAM07425_YAII63-13.raw	F4.9																		4.22	1	FALSE	0.0001042	7.327e-06
High	Unambiguous	[R].gTVTDFPGFDER.[A]	N-Term(TMTpro)	1	P08758	P08758	0	2	0.4948	0	1	1	822.913	1644.82	1644.82	0.17	0.00014	CID (Collision Induced Dissociation)	MS2	0	11.8	55.552	68.4272	14427	201015L_YASAM07425_YAII63-13.raw	F4.9	3141.25	2404.04	2824.26	3545.01	2801.94	2455.1	3193.79	3865.48	861.269	3063.52	3064.8	3700.11	2733.27	3552.9	2382.1	2952.86		3.84	1	FALSE	0.0001042	5.918e-06
High	Unambiguous	[K].sIQEIQELDkDDESLR.[K]	N-Term(TMTpro); K10(TMTpro)	1	P52565	P52565	1	3	0.5253	0	1	1	842.79	2526.36	2526.35	0.65	0.00055	CID (Collision Induced Dissociation)	MS2	9.52969	25.8	32.216	68.3868	14417	201015L_YASAM07425_YAII63-13.raw	F4.9	6567.6	4320.2	8974.6	6516.85	3900.93	10407.5	7924.79	6633.56	1866.69	5792.64	7244.69	8645.57	6524.7	10894.8	3903.06	4556.07		4.34	1	FALSE	0.0001042	1.537e-05
High	Unambiguous	[K].vHSPSGALEEcYVTEIDQDk.[Y]	N-Term(TMTpro); C11(Carbamidomethyl); K20(TMTpro)	1	P21333	P21333	0	3	0.4487	0	1	1	962.487	2885.45	2885.45	-0.75	-0.00073	CID (Collision Induced Dissociation)	MS2	7.00516	14.1	67.758	68.375	14414	201015L_YASAM07425_YAII63-13.raw	F4.9	3435.39	3723.67	2863.67	3805.57	3359.54	5271.18	4666.76	3119.93	2434.01	2231.26	4161.87	4451.89	3642.34	4409.91	4023.84	3013.59		5.17	1	FALSE	0.0001042	4.06e-06
High	Unambiguous	[R].yEEVSVSGFEEFHR.[A]	N-Term(TMTpro)	1	Q9BRA2	Q9BRA2	0	3	0.6472	0	1	1	673.664	2018.98	2018.98	-0.49	-0.00033	CID (Collision Induced Dissociation)	MS2	3.07265	0.1	24.032	68.3575	14408	201015L_YASAM07425_YAII63-13.raw	F4.9											557.37							5.64	1	FALSE	0.0001042	7.124e-08
High	Unambiguous	[K].lVQDVANNTNEEAGDGTTTATVLAR.[S]	N-Term(TMTpro)	1	P10809	P10809	0	3	0.5391	0	1	1	955.489	2864.45	2864.46	-0.86	-0.00082	CID (Collision Induced Dissociation)	MS2	12.1416	11.6	59.362	67.485	14194	201015L_YASAM07425_YAII63-13.raw	F4.9	2939.81	3383.3	2615.43	3978.39	2765.53	2578.09	3320.81	2879.77	1461.25	2310.87	3361.32	3326.11	3365.69	3625.89	2830.16	2295.27		5.88	1	FALSE	0.0001042	5.393e-08
High	Unambiguous	[R].dQYSVIFESGDR.[T]	N-Term(TMTpro)	1	P55884	P55884	0	2	0.4482	0	1	1	860.429	1719.85	1719.85	-0.08	-7e-05	CID (Collision Induced Dissociation)	MS2	7.82208	19.4	47.637	67.4645	14188	201015L_YASAM07425_YAII63-13.raw	F4.9	4635.42	4235.39	7038.68	4987.25	4165	5702.21	5904.89	6419.29	2166.03	4092.13	6310.54	5109.46	4474.47	5733.61	3408.9	3973.24		4.44	1	FALSE	0.0001042	0.0001057
High	Unambiguous	[R].eTIELVHTEPTDVAQLPSR.[V]	N-Term(TMTpro)	1	Q6IBS0	Q6IBS0	0	3	0.6255	0	1	1	813.774	2439.31	2439.31	1.12	0.00091	CID (Collision Induced Dissociation)	MS2	30.2505	10.7	30.828	67.4114	14176	201015L_YASAM07425_YAII63-13.raw	F4.9	3167.91	1910.94	2629.23	3445.92	2435.43	2815.17	2826.12	2269.82	1637.16	2214.95	2680.29	2966.13	3868.81	3237.6	2075.08	1905.48		4.86	1	FALSE	0.0001042	7.096e-07
High	Unambiguous	[R].iVHSLDYYNTcEYPNEDEMPNR.[C]	N-Term(TMTpro); C11(Carbamidomethyl)	1	Q9BXP5	Q9BXP5	0	3	0.8482	0	1	1	1021.8	3063.38	3063.38	0.33	0.00034	CID (Collision Induced Dissociation)	MS2	0	7.6	119.5	67.188	14113	201015L_YASAM07425_YAII63-13.raw	F4.9	2612.31	1658.11	3063.74	2089.26	1912.98	1735.2	1272.08	1160.68	1168.59	2426.08	2166.33	3001.37	1907.15	1808.56	999.876	948.05		6.85	1	FALSE	0.0001042	1.294e-07
High	Unambiguous	[K].iREDLPNLESSEETEQINk.[H]	N-Term(TMTpro); K19(TMTpro)	1	Q96QK1	Q96QK1	1	3	0.563	0	1	1	951.511	2852.52	2852.51	1.4	0.00134	CID (Collision Induced Dissociation)	MS2	9.556	21.4	119.5	67.1642	14106	201015L_YASAM07425_YAII63-13.raw	F4.9	3912.15	3664.59	4799.61	7025.43	5053.29	7425.42	7719.49	5152.42	1249.28	3942.34	5037.55	7730.91	5019.9	8112.74	5923.65	3768.15		5.08	1	FALSE	0.0001042	3.909e-06
High	Unambiguous	[K].dYAFVHFEDR.[G]	N-Term(TMTpro)	1	O43390	O43390	0	3	0.5649	0	1	1	534.934	1602.79	1602.79	0.67	0.00036	CID (Collision Induced Dissociation)	MS2	0	3.1	29.018	67.1149	14093	201015L_YASAM07425_YAII63-13.raw	F4.9	1207.39	1239.67	1220.07		791.746	539.614	1519.14	661.689			1921.92	729.797	1400.87	1036.85	1136.88	656.187		4.85	1	FALSE	0.0001042	5.568e-05
High	Unambiguous	[R].yQETFNVIER.[C]	N-Term(TMTpro)	1	Q13011	Q13011	0	2	0.3046	0	1	1	801.927	1602.85	1602.84	0.97	0.00078	CID (Collision Induced Dissociation)	MS2	45.12	17.2	28.068	67.0908	14088	201015L_YASAM07425_YAII63-13.raw	F4.9	5044.34	4258.52	4795.26	5065.4	4329.67	4711.33	5525.94	3977.82	2255.28	2990.21	5563.1	3981.02	4408.31	5689.27	3626.06	3021.41		3.48	1	FALSE	0.0001042	0.0003694
High	Unambiguous	[K].aEGPEVDVNLPk.[A]	N-Term(TMTpro); K12(TMTpro)	1	Q09666	Q09666	0	2	0.5015	0	1	1	938.537	1876.07	1876.07	-0.76	-0.00071	CID (Collision Induced Dissociation)	MS2	25.809	25.1	119.5	67.0656	14083	201015L_YASAM07425_YAII63-13.raw	F4.9	6150.09	5291.98	5969.72	6156.84	4913.11	9190.12	7636.57	6496.11	1966.88	4228.57	6875.33	7640.59	6458.34	9364.15	7391.69	3742.83		3.35	1	FALSE	0.0001042	0.0001071
High	Unambiguous	[R].sYGPAPGAGHVQEESNLSLQALESR.[Q]	N-Term(TMTpro)	1	Q13155	Q13155	0	3	0.6706	0	1	1	967.826	2901.46	2901.47	-1.08	-0.00104	CID (Collision Induced Dissociation)	MS2	31.4231	22.8	77.324	67.054	14080	201015L_YASAM07425_YAII63-13.raw	F4.9	4645.59	5463.08	6125.91	6121.5	5131.41	6061.7	8622.23	6428.28	3356.5	5108.83	6316.46	5949.22	4733.77	5361.21	5055.44	4819.47		5.07	1	FALSE	0.0001042	1.379e-06
High	Unambiguous	[K].nIEIDSPYEISR.[A]	N-Term(TMTpro)	1	P04843	P04843	0	2	0.4507	0	1	1	870.459	1739.91	1739.91	-1.05	-0.00091	CID (Collision Induced Dissociation)	MS2	23.8351	21.5	81.866	67.0176	14072	201015L_YASAM07425_YAII63-13.raw	F4.9	6198.36	3311.29	7263.39	5217.05	4670.04	6958.8	7116.93	4008.28	2120.49	4946.21	6568.57	6900.06	6857.11	7350.14	4699.84	4337.29		3.75	1	FALSE	0.0001042	0.000329
High	Unambiguous	[K].hNDDEQYAWESSAGGSFTVR.[TA]	N-Term(TMTpro)	3	P07900; P08238	P07900; P08238; Q14568	0	3	0.7667	0	1	1	854.06	2560.17	2560.17	0.01	1e-05	CID (Collision Induced Dissociation)	MS2	32.5216	27.6	28.943	67.0067	14069	201015L_YASAM07425_YAII63-13.raw	F4.9	6840.07	6004.26	7483.34	8753.21	5172.23	7437.22	7498.6	6972.06	2668.35	5699.57	7749.9	9048.65	8796.82	7987.5	7638.47	4393		5.7	2	FALSE	0.0001042	1.176e-07
High	Unambiguous	[R].iDQYQGADAVGLEEk.[I]	N-Term(TMTpro); K15(TMTpro)	1	O43396	O43396	0	2	0.4048	0	1	1	1122.6	2244.19	2244.2	-4.51	-0.00506	CID (Collision Induced Dissociation)	MS2	53.8647	13.3	72.86	66.9816	14064	201015L_YASAM07425_YAII63-13.raw	F4.9	4302.62	2493.01	4372.59	2488.25	2905.98	3594.88	5987.78	3568.37	857.011	2325.6	3456.66	4965.15	3590.99	3651.48	3261.5	2126.54		3.73	1	FALSE	0.0001042	0.000215
High	Unambiguous	[R].ecPSDEcGAGVFMASHFDR.[H]	N-Term(TMTpro); C2(Carbamidomethyl); C7(Carbamidomethyl)	1	P62979	P62979	0	3	0.9588	0	1	1	826.027	2476.07	2476.07	0.67	0.00056	CID (Collision Induced Dissociation)	MS2	6.5419	12.8	19.061	66.8861	14040	201015L_YASAM07425_YAII63-13.raw	F4.9	3039.48	3190.9	3475.9	3280.09	3380.37	4480.16	4152.47	3981.8	1075.5	3255.61	3755.95	3132.68	3212.15	4658.78	2897.87	2447.48		8	1	FALSE	0.0001042	3.592e-14
High	Unambiguous	[R].sELHIENLNMEADPGQYR.[C]	N-Term(TMTpro)	1	P35613	P35613	0	3	0.5728	0	1	1	807.4	2420.19	2420.18	0.89	0.00072	CID (Collision Induced Dissociation)	MS2	58.6262	13.4	25.943	66.8153	14022	201015L_YASAM07425_YAII63-13.raw	F4.9	2775.25	3821.41	3755.22	2951.75	3194.28	4620.96	4616.32	2884.38	1270.63	3074.72	2691.57	2740.4	3410.28	4406.43	4129.87	3068.4		4.12	1	FALSE	0.0001042	1.281e-05
High	Unambiguous	[K].lLEAHEEQNVDSYTESVk.[E]	N-Term(TMTpro); K18(TMTpro)	1	P54920	P54920	0	3	0.5365	0	1	1	900.472	2699.4	2699.4	-0.48	-0.00043	CID (Collision Induced Dissociation)	MS2	7.30043	18.5	38.413	66.7762	14011	201015L_YASAM07425_YAII63-13.raw	F4.9	3691.72	3598.54	5345.64	5358.25	4606.57	5785.54	6488.54	5387.93	1926.03	3544.75	5389.19	6162.38	4122.03	7052.4	4580.45	3668.15		4.66	1	FALSE	0.0001042	2.725e-06
High	Unambiguous	[K].hGYIGEFEIIDDHR.[A]	N-Term(TMTpro)	1	P62244	P62244	0	4	0.5794	0	1	1	502.008	2005.01	2005.01	-0.16	-8e-05	CID (Collision Induced Dissociation)	MS2	0		27.102	67.5372	14207	201015L_YASAM07425_YAII63-13.raw	F4.9																		3.59	1	FALSE	0.0001042	4.451e-06
High	Unambiguous	[K].iIEDQQESLNk.[W]	N-Term(TMTpro); K11(TMTpro)	1	P05455	P05455	0	2	0.3721	0	1	1	963.045	1925.08	1925.08	-0.88	-0.00085	CID (Collision Induced Dissociation)	MS2	0	28	50.239	63.7563	13097	201015L_YASAM07425_YAII63-13.raw	F4.9	6555	5689.73	7801.73	6204.79	5927.2	10539.5	10955.5	6860.5	2451.22	4893.49	6034.92	9879.27	6064.12	8327.4	8524.04	5433.62		4.3	1	FALSE	0.0001042	0.0001107
High	Unambiguous	[K].iNQQEEPGFEVITR.[I]	N-Term(TMTpro)	1	Q8TC07	Q8TC07	0	2	0.3776	0	1	1	982.523	1964.04	1964.04	-0.99	-0.00098	CID (Collision Induced Dissociation)	MS2	20.3013	14.3	74.03	67.5401	14208	201015L_YASAM07425_YAII63-13.raw	F4.9	4077.69	3869.12	3581.61	3661.96	3616.3	5247.52	4429.01	3148.31	1120.79	3483.31	3198.6	4452.03	3350.96	4456.42	3927.26	1906.05		3.92	1	FALSE	0.0001042	8.92e-06
High	Unambiguous	[K].gVVDSDDLPLNVSR.[E]	N-Term(TMTpro)	1	P14625	P14625	0	2	0.5148	0	1	1	895.486	1789.96	1789.96	1.28	0.00114	CID (Collision Induced Dissociation)	MS2	20.9942	24.9	43.064	67.5661	14216	201015L_YASAM07425_YAII63-13.raw	F4.9	7444.98	4645.46	7360.1	6497.24	5608.99	6426.46	6531.5	6509.29	3874.1	5786.83	5984.08	6985.83	7194.76	6969.69	5832.06	4928.92		3.71	1	FALSE	0.0001042	7.55e-06
High	Unambiguous	[R].tVLDPVTGDLSDTR.[T]	N-Term(TMTpro)	1	Q15393	Q15393	0	2	0.5594	0	1	1	896.984	1792.96	1792.96	-0.17	-0.00015	CID (Collision Induced Dissociation)	MS2	19.1086	34.7	41.039	68.3534	14406	201015L_YASAM07425_YAII63-13.raw	F4.9	8596.29	8321.98	9702.87	9029.62	8250.24	10639.6	10230.7	9718.56	3171.93	6895.26	9808.77	10785.3	8672.72	10527.9	8269.01	7908.88		4.38	1	FALSE	0.0001042	6.838e-05
High	Unambiguous	[R].tTYLVLDEADR.[M]	N-Term(TMTpro)	1	P17844	P17844	0	2	0.3188	0	1	1	800.431	1599.86	1599.85	0.45	0.00036	CID (Collision Induced Dissociation)	MS2	24.8566	11.1	37.216	68.3087	14394	201015L_YASAM07425_YAII63-13.raw	F4.9	3084.19	2540.65	2333.73	3125.43	2314.28	2540.4	3305.66	2665.72	1227.52	2982.47	3970.83	2814.1	3155.47	2739.9	2436.34	2273.2		2.98	1	FALSE	0.0001042	0.0001523
High	Unambiguous	[R].nPDDITNEEYGEFYk.[S]	N-Term(TMTpro); K15(TMTpro)	1	P07900	P07900	0	2	0.6316	0	1	1	1221.6	2442.19	2442.2	-0.42	-0.00051	CID (Collision Induced Dissociation)	MS2	0	10.2	119.5	68.1991	14365	201015L_YASAM07425_YAII63-13.raw	F4.9	2173.52	1740.99	3121.38	2485.29	2593.3	2915.82	4348.68	2266.28		1278.54	2166.93	3429.66	3138.05	3757.96	2321.82	1433.43		5.89	1	FALSE	0.0001042	3.245e-08
High	Unambiguous	[K].iVLEDGTLHVTEGSGR.[Y]	N-Term(TMTpro)	1	Q16555	Q16555	0	3	0.4588	0	1	1	663.032	1987.08	1987.08	1.93	0.00128	CID (Collision Induced Dissociation)	MS2	0	5.9	15.134	68.113	14345	201015L_YASAM07425_YAII63-13.raw	F4.9	1664.15	1163.33	2115.37	1852.22	2104.12	2012.78	779.006	1670.95	906.492	1269.34	637.851	1740.33	2164.41	1443.32	1406.8			4.73	1	FALSE	0.0001042	1.987e-05
High	Unambiguous	[K].aLELDPDNETYk.[S]	N-Term(TMTpro); K12(TMTpro)	1	O43765	O43765	0	2	0.4586	0	1	1	1008.54	2016.08	2016.08	-0.03	-3e-05	CID (Collision Induced Dissociation)	MS2	23.487	27.9	119.5	68.0979	14340	201015L_YASAM07425_YAII63-13.raw	F4.9	5531.33	4645.4	9027.13	7526.02	5408.6	9339.88	9164.72	6377.64	1900.42	5168.82	9198.8	9705.56	6325.59	8599.16	8088.39	4140.58		4.23	1	FALSE	0.0001042	5.305e-05
High	Unambiguous	[K].eTIPLQETSLYTQDR.[L]	N-Term(TMTpro)	1	P50897	P50897	0	2	0.4404	0	1	1	1049.55	2098.1	2098.1	-1.07	-0.00112	CID (Collision Induced Dissociation)	MS2	0	10.3	119.5	68.0553	14331	201015L_YASAM07425_YAII63-13.raw	F4.9	2263.86	2127.43	2347.4	2548.24	1891.67	3689.68	3841.17	2491.16	1121.64	2194.92	2678.74	2864.75	3822.74	3254.82	2467.7	2754.29		3.86	1	FALSE	0.0001042	4.796e-05
High	Unambiguous	[K].aDRDESSPYAAMLAAQDVAQR.[C]	N-Term(TMTpro)	1	P62263	P62263	1	3	0.6294	0	1	1	857.093	2569.26	2569.26	0.29	0.00025	CID (Collision Induced Dissociation)	MS2	43.0561	26.9	9.964	68.0451	14328	201015L_YASAM07425_YAII63-13.raw	F4.9	11458.9	10521.1	11634	10941.2	9824.75	12065.6	14960	11292.4	4887.7	10914.6	11169.7	12850.9	13092.3	9248.82	12778.1	10667.6		4.29	1	FALSE	0.0001042	8.141e-06
High	Unambiguous	[R].yHTSQSGDEMTSLSEYVSR.[M]	N-Term(TMTpro)	1	P08238	P08238	0	3	0.7028	0	1	1	827.723	2481.16	2481.15	1.19	0.00098	CID (Collision Induced Dissociation)	MS2	0	9.9	25.711	68.0087	14320	201015L_YASAM07425_YAII63-13.raw	F4.9	1958.29	3073.72	2866.76	3533.91	2975.52	2819.53	3620.58	2571.83	2098.95	1257.75	3364.21	3283.15	3483.77	3489.23	2840.81	1725.4		5.35	1	FALSE	0.0001042	4.706e-06
High	Unambiguous	[R].yLMEEDEDAYk.[K]	N-Term(TMTpro); K11(TMTpro)	1	P46777	P46777	0	2	0.4727	0	1	1	1007.5	2014	2014	-0.71	-0.00071	CID (Collision Induced Dissociation)	MS2	19.9596	23.8	73.82	67.9766	14313	201015L_YASAM07425_YAII63-13.raw	F4.9	5629.48	4261.14	6723.38	5859.69	4160.23	6647.36	9529.53	5691.57	2341.17	4639.52	6479.54	7150.67	5153.2	7880.2	4206.44	3777.24		3.3	1	FALSE	0.0001042	3.595e-05
High	Unambiguous	[K].aQQEQELAADAFk.[E]	N-Term(TMTpro); K13(TMTpro)	1	P14314	P14314	0	2	0.4313	0	1	1	1029.06	2057.11	2057.12	-1.13	-0.00116	CID (Collision Induced Dissociation)	MS2	35.1191	25.6	119.5	67.9539	14306	201015L_YASAM07425_YAII63-13.raw	F4.9	5992.1	4824.81	8443.15	7101.27	4874.39	8836.24	8623.12	6375.93	1752.96	4968.5	6048.07	9291.86	6820.48	9881.97	3684.39	5171.67		4.66	1	FALSE	0.0001042	9.433e-07
High	Unambiguous	[K].tGTAEMSSILEER.[I]	N-Term(TMTpro)	1	P25705	P25705	0	2	0.3615	0	1	1	864.444	1727.88	1727.88	0.39	0.00034	CID (Collision Induced Dissociation)	MS2	42.1151	19.5	56.704	67.9078	14296	201015L_YASAM07425_YAII63-13.raw	F4.9	3770.25	4018.25	5422.31	5546.13	4661.57	7013.56	5232.51	3969.04	2171.7	4604.21	5504.83	6136.14	5198.79	5728.3	5152.49	4308.51		3.79	1	FALSE	0.0001042	3e-05
High	Unambiguous	[R].vGYYVNNEYTETELR.[E]	N-Term(TMTpro)	1	Q9Y294	Q9Y294	0	2	0.5845	0	1	1	1077.54	2154.07	2154.07	-0.45	-0.00049	CID (Collision Induced Dissociation)	MS2	29.6627	24.7	119.5	67.71	14252	201015L_YASAM07425_YAII63-13.raw	F4.9	5580.91	6599.18	6696.61	6458.76	6183.22	6488.42	7554.62	6215.84	2301.12	5272.29	6547.83	9715.51	6282.03	6493.13	3574.39	5311.13		3.61	1	FALSE	0.0001042	4.382e-07
High	Unambiguous	[K].lVQDVANNTNEEAGDGTTTATVLAR.[S]	N-Term(TMTpro)	1	P10809	P10809	0	2	0.6176	0	1	1	1432.73	2864.46	2864.46	0.66	0.00095	CID (Collision Induced Dissociation)	MS2	0	4.7	70.31	67.6612	14238	201015L_YASAM07425_YAII63-13.raw	F4.9	748.959	959.088	1373.93	1456.97	984.877	1879.94	1816.37	1473.3	1077.03	1445.4	1668.43	714.609	1178.46	1051.2	1060.55	930.127		6.38	1	FALSE	0.0001042	1.97e-07
High	Unambiguous	[K].gTGVVTSVPSDSPDDIAALR.[D]	N-Term(TMTpro)	1	Q9P2J5	Q9P2J5	0	2	0.6244	0	1	1	1131.1	2261.19	2261.19	-1.1	-0.00124	CID (Collision Induced Dissociation)	MS2	14.5304	10.8	119.5	67.6321	14231	201015L_YASAM07425_YAII63-13.raw	F4.9	3008.56	3170.56	2637.29	2674.63	1800.58	2569.91	2970.24	2330.11	1284.5	3143.69	3719.22	2275.57	2846.36	2514.24	2854.76	3063		5.83	1	FALSE	0.0001042	5.644e-08
High	Unambiguous	[R].sEDPDQQYLILNTAR.[K]	N-Term(TMTpro)	1	Q96QK1	Q96QK1	0	2	0.5204	0	1	1	1034.04	2067.07	2067.07	-0.16	-0.00017	CID (Collision Induced Dissociation)	MS2	19.0799	20	119.5	67.6199	14228	201015L_YASAM07425_YAII63-13.raw	F4.9	5530.64	3705.6	5275.06	5462.57	5177.96	6208.05	6642.73	5870.75	2490.55	4724.61	5959.27	6315.71	5422.65	5216.68	4380.41	2935.16		3.67	1	FALSE	0.0001042	5.866e-06
High	Unambiguous	[K].lEEEGEQFVk.[K]	N-Term(TMTpro); K10(TMTpro)	1	P22307	P22307	0	2	0.4962	0	1	1	908.503	1816	1816	-0.1	-9e-05	CID (Collision Induced Dissociation)	MS2	10.9369	23.4	50.271	67.5548	14213	201015L_YASAM07425_YAII63-13.raw	F4.9	5105.22	3504.69	6751.78	5546.61	4351.04	7833.95	8178.66	5681.13	2499.64	4939.95	6189.04	7493.35	5781.83	8552.68	4810.74	3712.04		3.95	1	FALSE	0.0001042	0.0002616
High	Unambiguous	[R].sLEAQVAHADQQLR.[D]	N-Term(TMTpro)	1	Q14980	Q14980	0	3	0.5506	0	1	1	624.008	1870.01	1870.01	-0.8	-0.0005	CID (Collision Induced Dissociation)	MS2	0	9	13.416	63.7354	13088	201015L_YASAM07425_YAII63-13.raw	F4.9	2331.69	2343.28	4070.08	3488	2506.09	2926.86	3578	2946.76	1745.68	3397.17	2624.71	3668.83	3274.52	3483.73	3074.16	1960.65		4.25	1	FALSE	0.0001042	5.14e-06
High	Unambiguous	[K].hTGccGDNDPIDVcEIGSk.[V]	N-Term(TMTpro); C4(Carbamidomethyl); C5(Carbamidomethyl); C14(Carbamidomethyl); K19(TMTpro)	1	Q15181	Q15181	0	3	0.7818	0	1	1	914.764	2742.28	2742.28	-0.25	-0.00023	CID (Collision Induced Dissociation)	MS2	5.502	45.2	22.888	63.7055	13074	201015L_YASAM07425_YAII63-13.raw	F4.9	10456.7	10214.3	10148.1	9754.37	7525.72	12956.7	14903.5	10480.8	3597.56	8792.5	12874.2	18468.6	10957	14884.1	14689.4	6888.94		6.83	1	FALSE	0.0001042	8.954e-10
High	Unambiguous	[K].tVAVWDSETGER.[V]	N-Term(TMTpro)	1	Q96DI7	Q96DI7	0	2	0.4913	0	1	1	827.423	1653.84	1653.84	-1	-0.00083	CID (Collision Induced Dissociation)	MS2	0	18.8	26.924	63.6891	13068	201015L_YASAM07425_YAII63-13.raw	F4.9	4349.17	4308.09	4372.73	4456.34	4263.85	4804.31	5675.12	5077.83	2267.87	4236.86	4724.21	5741.46	4993.95	6355.71	5323.9	4172.13		3.44	1	FALSE	0.0001042	7.476e-05
High	Unambiguous	[K].eGIcAIGGTSEQSSVGTQHSYSEEEk.[Y]	N-Term(TMTpro); C4(Carbamidomethyl); K26(TMTpro)	1	P13796	P13796	0	4	0.6416	0	1	1	845.412	3378.62	3378.63	-0.06	-5e-05	CID (Collision Induced Dissociation)	MS2	0	21.3	8.66	61.5479	12134	201015L_YASAM07425_YAII63-13.raw	F4.9	9653.36	9086.79	12949.7	12032.3	11744.5	19173.9	17927.4	8569.07	2530.28	5583.67	11929.2	15294.3	13616.8	18475.4	13587.8	4715.96		7.84	1	FALSE	0.0001042	6.983e-10
High	Unambiguous	[K].eNQIPEEAGSSGLGk.[A]	N-Term(TMTpro); K15(TMTpro)	1	Q15004	Q15004	0	2	0.4979	0	1	1	1062.57	2124.14	2124.14	-1.36	-0.00145	CID (Collision Induced Dissociation)	MS2	0	7	97.023	61.4963	12113	201015L_YASAM07425_YAII63-13.raw	F4.9	1080.58	2174.53	2011.53	2084.13	1567.74	2822.69	1780.04	1445.62	657.591	1389.7	1692.81	2338.32	2134.45	2840.77	687.428	1562.54		4.74	1	FALSE	0.0001042	1.803e-06
High	Unambiguous	[RK].vEIIANDQGNR.[TI]	N-Term(TMTpro)	5	P11142; P11021; P0DMV9	P54652; P11142; P11021; P0DMV9; P34931	0	3	0	0	1	1	511.617	1532.84	1532.84	0.77	0.00039	CID (Collision Induced Dissociation)	MS2	5.43118	17.3	5.993	61.4524	12092	201015L_YASAM07425_YAII63-13.raw	F4.9	6651.08	9567.45	9238.8	7960.97	6235.98	9152.1	8976.43	10147.7	3103.79	7127.04	9887.15	8506.65	7498.2	10291.6	8279.35	7713.63		4.29	3	FALSE	0.0001042	0.000365
High	Unambiguous	[K].fRPDMEEEEAk.[N]	N-Term(TMTpro); K11(TMTpro)	1	Q99436	Q99436	0	3	0.1761	0	1	1	663.679	1989.02	1989.02	-1.18	-0.00078	CID (Collision Induced Dissociation)	MS2	5.9038	25.4	5.419	61.45	12090	201015L_YASAM07425_YAII63-13.raw	F4.9	13109.3	13163.3	17134.5	14572.3	16876.5	22162.1	23456	13728	3329.71	14378.5	16950.7	24184.7	16226.6	19476	18558.9	10526.5		3.01	1	FALSE	0.0001042	0.000305
High	Unambiguous	[K].sAVGHEYVAEVEk.[H]	N-Term(TMTpro); K13(TMTpro)	1	P14317	P14317	0	2	0.4879	0	1	1	1013.56	2026.11	2026.11	-0.68	-0.00069	CID (Collision Induced Dissociation)	MS2	0	12.5	93.661	61.4056	12071	201015L_YASAM07425_YAII63-13.raw	F4.9	2189.67	2988.03	3068.37	3317.47	2162.42	2903.71	4859.29	3243.99	1503.13	1918.94	3088.24	4835.9	4097.76	4091.69	3401.57	2659.11		4.12	1	FALSE	0.0001042	1.177e-05
High	Unambiguous	[R].sDAGLESDTAMk.[K]	N-Term(TMTpro); K12(TMTpro)	1	Q9NR30	Q9NR30	0	2	0.3343	0	1	1	916.981	1832.95	1832.96	-0.96	-0.00088	CID (Collision Induced Dissociation)	MS2	48.8597	16.5	74.57	61.3932	12067	201015L_YASAM07425_YAII63-13.raw	F4.9	4017.48	3555.91	6161.47	4960.76	2702.53	5205.38	5338.25	4184.11	1802.51	2426.74	3472.09	5199.29	5083.94	5897.05	3166.35	3643.86		3.35	1	FALSE	0.0001042	0.000126
High	Unambiguous	[K].eQQEPSSGGSVVPTVQEPk.[D]	N-Term(TMTpro); K19(TMTpro)	1	Q96JJ7	Q96JJ7	0	3	0.4745	0	1	1	864.466	2591.38	2591.38	1.08	0.00094	CID (Collision Induced Dissociation)	MS2	0	26.1	24.54	61.5775	12149	201015L_YASAM07425_YAII63-13.raw	F4.9	6063.67	5157.23	6018.35	6844.53	5333.66	8489.77	7937.24	6712.36	2174.48	4773.26	7231.72	8700.45	6517.68	9076.04	7935.62	3375.79		4.51	1	FALSE	0.0001042	1.168e-05
High	Unambiguous	[K].eDSNLTLQEk.[K]	N-Term(TMTpro); K10(TMTpro)	1	P46940	P46940	0	2	0.3983	0	1	1	892.998	1784.99	1784.99	0.42	0.00037	CID (Collision Induced Dissociation)	MS2	18.1515	30.5	90.487	61.3903	12066	201015L_YASAM07425_YAII63-13.raw	F4.9	6755.49	5464.71	9465.85	7117.31	5673.26	9900.93	12278.7	7837.68	2362.43	5332.82	8180.64	12470.4	8019.59	9555.06	6978.6	4729.16		3.54	1	FALSE	0.0001042	0.0002032
High	Unambiguous	[R].vHIPNDDAQFDASHcDSDk.[G]	N-Term(TMTpro); C15(Carbamidomethyl); K19(TMTpro)	1	Q16576	Q16576	0	3	0.6447	0	1	1	927.11	2779.31	2779.32	-3.52	-0.00326	CID (Collision Induced Dissociation)	MS2	43.519	18.8	50.045	61.3526	12051	201015L_YASAM07425_YAII63-13.raw	F4.9	5117.45	4257.07	6659.68	4388.27	4176.32	5419.72	5934.66	4072.49	1641.19	3695.24	4049.22	6371.26	4635.68	5597.61	4908.92	3226.81		4.56	1	FALSE	0.0001042	2.159e-06
High	Unambiguous	[K].yGQHPPDAVDEPQmLTNEk.[L]	N-Term(TMTpro); M14(Oxidation); K19(TMTpro)	1	P26358	P26358	0	3	0.6195	0	1	1	931.804	2793.4	2793.4	-0.9	-0.00083	CID (Collision Induced Dissociation)	MS2	0	17	70.955	61.2185	11987	201015L_YASAM07425_YAII63-13.raw	F4.9	4058.89	3303.06	4986.79	4132.51	3853.66	4500.7	6240.55	3416.62	1074.35	3016.11	5045.55	5661.93	4463.54	5057.18	5328.86	2931.7		4.81	1	FALSE	0.0001042	1.28e-05
High	Unambiguous	[K].aDEASELAcPTPk.[E]	N-Term(TMTpro); C9(Carbamidomethyl); K13(TMTpro)	1	P49327	P49327	0	2	0.4606	0	1	1	999.028	1997.05	1997.05	-0.76	-0.00076	CID (Collision Induced Dissociation)	MS2	0	14.8	43.546	61.2149	11986	201015L_YASAM07425_YAII63-13.raw	F4.9	4135.8	2804.25	2882.86	3947.31	2884.22	6026.28	4581.9	3721.99	669.827	3029.55	3736.85	5638.65	3568.82	4510.18	4831.27	2524.37		4.19	1	FALSE	0.0001042	3.637e-07
High	Unambiguous	[R].eAGDVcYADVQk.[D]	N-Term(TMTpro); C6(Carbamidomethyl); K12(TMTpro)	1	Q13242	Q13242	0	2	0.4945	0	1	1	982.006	1963.01	1963.01	-1.71	-0.00167	CID (Collision Induced Dissociation)	MS2	0	25.6	60.266	61.2083	11984	201015L_YASAM07425_YAII63-13.raw	F4.9	6704.56	5081.25	7272.01	7518.97	4715.36	7477.34	9655.16	4179.76	1931.1	4918.56	6732.9	9052.38	6502.33	7680.65	7705.27	4936.57		4.53	1	FALSE	0.0001042	5.108e-06
High	Unambiguous	[RK].vEIIANDQGNR.[TI]	N-Term(TMTpro)	5	P11142; P11021; P0DMV9	P54652; P11142; P11021; P0DMV9; P34931	0	2	0	0	1	1	766.92	1532.83	1532.84	-1.23	-0.00094	CID (Collision Induced Dissociation)	MS2	2.46421	22.1	2.738	61.2049	11982	201015L_YASAM07425_YAII63-13.raw	F4.9	24227.2	26120.2	28276.2	31191.2	25924.7	32482.4	36341.5	31229.3	9401.29	25438	30438.5	30627.2	28296.4	37061.5	27801.3	21342.7		3.16	3	FALSE	0.0001042	0.0001854
High	Unambiguous	[K].eGIcAIGGTSEQSSVGTQHSYSEEEk.[Y]	N-Term(TMTpro); C4(Carbamidomethyl); K26(TMTpro)	1	P13796	P13796	0	3	0.7242	0	1	1	1126.88	3378.63	3378.63	0.75	0.00085	CID (Collision Induced Dissociation)	MS2	0	7.8	119.5	61.1332	11951	201015L_YASAM07425_YAII63-13.raw	F4.9	1810.34	1738.21	2668.03	2597.07	1242.13	3045.73	2304.06	3099.54		1826.56	2022	2371.69	2012.18	3083.66	2557.67			8.05	1	FALSE	0.0001042	5.074e-10
High	Unambiguous	[R].sADEPmTTFVVcNEcGNR.[W]	N-Term(TMTpro); M6(Oxidation); C12(Carbamidomethyl); C15(Carbamidomethyl)	1	P23193	P23193	0	2	0.2861	0	1	1	1204.04	2407.06	2407.06	-0.41	-0.00049	CID (Collision Induced Dissociation)	MS2	19.0748	0.8	119.5	61.3674	12057	201015L_YASAM07425_YAII63-13.raw	F4.9		787.322				601.903	555.452	584.676					849.502					4.09	1	FALSE	0.0001042	9.83e-05
High	Unambiguous	[R].sSFYPDGGDQETAk.[T]	N-Term(TMTpro); K14(TMTpro)	1	Q9NYF8	Q9NYF8	0	2	0.3273	0	1	1	1055.53	2110.06	2110.06	1.02	0.00108	CID (Collision Induced Dissociation)	MS2	44.6189	16.3	60.562	61.5819	12152	201015L_YASAM07425_YAII63-13.raw	F4.9	4507.84	2372.19	2086.75	4851.34	3280.72	5815.67	6895.64	3911.99	1334.07	3386.59	4809.41	4391.8	5117.21	4701.97	4676.23	2504.02		4.4	1	FALSE	0.0001042	9.674e-05
High	Unambiguous	[K].tDHPEIGEGkPTPALSEEASSSSIR.[E]	N-Term(TMTpro); K10(TMTpro)	1	Q16891	Q16891	0	4	0.6553	0	1	1	801.674	3203.67	3203.67	2.15	0.00172	CID (Collision Induced Dissociation)	MS2	15.2241	11.9	13.192	61.5991	12160	201015L_YASAM07425_YAII63-13.raw	F4.9	7683.31	7508.95	10244.9	8189.7	7280.92	12036.6	8830.43	7587.85	2144.74	6100.9	8586.6	8575.77	8769.91	12119.6	8188.63	6012.87		5.89	1	FALSE	0.0001042	1.289e-06
High	Unambiguous	[K].tEDEVLTSk.[G]	N-Term(TMTpro); K9(TMTpro)	1	Q9BQ61	Q9BQ61	0	2	0.3141	0	1	1	815.463	1629.92	1629.92	0.17	0.00014	CID (Collision Induced Dissociation)	MS2	46.0869	28.3	13.688	61.6293	12174	201015L_YASAM07425_YAII63-13.raw	F4.9	5344.9	5497.04	9496.26	7108.2	5979.33	9547.18	10051.8	6581.02	2909.67	3952.79	7747.1	10338	6678.45	7728.06	7211.94	4821.62		3.12	1	FALSE	0.0001042	0.000278
High	Unambiguous	[R].dQDLEPGAPSMGAk.[S]	N-Term(TMTpro); K14(TMTpro)	1	P07814	P07814	0	2	0.4625	0	1	1	1012.53	2024.06	2024.06	-1.37	-0.00138	CID (Collision Induced Dissociation)	MS2	7.99768	20.1	47.206	61.9247	12304	201015L_YASAM07425_YAII63-13.raw	F4.9	4643.23	4077.65	6060.96	4836.95	3977.19	6511.52	7096.22	4377.89	1835.42	4064.55	5216.75	8721.37	6825.47	7704.6	3463.87	3329.3		4.13	1	FALSE	0.0001042	2.002e-05
High	Unambiguous	[R].gLGAGAGAGEESPATSLPR.[M]	N-Term(TMTpro)	1	O15173	O15173	0	2	0.6679	0	1	1	1001.53	2002.05	2002.05	0.05	5e-05	CID (Collision Induced Dissociation)	MS2	0	9.3	95.403	61.9073	12297	201015L_YASAM07425_YAII63-13.raw	F4.9	2385.87	2424.54	2974.22	2100.63	2014.9	3225.26	2186.25	2264.39	1535.36	2011.96	2232.54	2557.56	2911.26	2103.85	2273.19	1992.56		5.6	1	FALSE	0.0001042	6.95e-07
High	Unambiguous	[K].vEPGLGADNSVVR.[F]	N-Term(TMTpro)	1	P21333	P21333	0	2	0.3042	0	1	1	808.95	1616.89	1616.89	0.26	0.00021	CID (Collision Induced Dissociation)	MS2	7.27277	25.6	9.449	61.8985	12292	201015L_YASAM07425_YAII63-13.raw	F4.9	13030.6	11585.6	13314.7	15093.5	11213.3	16241.9	13755.5	14097.8	4503.49	11742.2	13950.5	15739.6	12548.6	17383.5	11452.5	9670.2		3.32	1	FALSE	0.0001042	9.916e-05
High	Unambiguous	[R].eLAEAVAGGR.[V]	N-Term(TMTpro)	1	Q9UBT2	Q9UBT2	0	2	0.3108	0	1	1	638.862	1276.72	1276.72	-0.45	-0.00029	CID (Collision Induced Dissociation)	MS2	0	22.8	7.149	61.8823	12284	201015L_YASAM07425_YAII63-13.raw	F4.9	11557.1	14440.3	16393.9	16559.7	9910.13	17408.5	12819.6	12718	7014.69	12499.2	13883.1	18214.7	15352.1	14230.2	14687.4	7622.49		2.51	1	FALSE	0.0001042	0.0002759
High	Unambiguous	[R].gSSGVGLTAAVTTDQETGER.[R]	N-Term(TMTpro)	1	P25205	P25205	0	2	0.4993	0	1	1	1120.57	2240.13	2240.13	0.36	0.0004	CID (Collision Induced Dissociation)	MS2	0	3.3	72.89	61.8631	12276	201015L_YASAM07425_YAII63-13.raw	F4.9	1004.67	561.245	1115.38	1095.47		1187.43	1244.08		598.13		942.541	1692.37	867.119	1268.16	1190.78	945.487		7.43	1	FALSE	0.0001042	2.686e-08
High	Unambiguous	[K].eHNGQVTGIDWAPESNR.[I]	N-Term(TMTpro)	1	O15143	O15143	0	3	0.6837	0	1	1	738.701	2214.09	2214.09	1.06	0.00079	CID (Collision Induced Dissociation)	MS2	19.9682	10.7	6.493	61.8525	12270	201015L_YASAM07425_YAII63-13.raw	F4.9	6378.15	8189.3	7068.07	7424.22	4138.94	8722.71	9621.58	6607.82	2386.33	7937.93	8593.82	9427.52	6594.94	9516.18	7749.73	7802.13		5.47	1	FALSE	0.0001042	7.635e-05
High	Unambiguous	[K].mHDLNTDQENLVGTHDAPIR.[C]	N-Term(TMTpro)	1	O43684	O43684	0	4	0.6066	0	1	1	645.826	2580.28	2580.28	0.71	0.00046	CID (Collision Induced Dissociation)	MS2	34.0187	13.7	6.932	61.8261	12260	201015L_YASAM07425_YAII63-13.raw	F4.9	12135.6	10174.8	9591.79	10010	9354.29	11050.2	10482.3	11027.4	5309.21	9200.28	8396.6	9075.43	10491.3	10014.7	6300.21	8577.45		4.83	1	FALSE	0.0001042	1.324e-05
High	Unambiguous	[K].iSGGSVVEMQGDEmTR.[I]	N-Term(TMTpro); M14(Oxidation)	1	O75874	O75874	0	2	0.3005	0	1	1	1008.49	2015.97	2015.97	-1.78	-0.0018	CID (Collision Induced Dissociation)	MS2	13.9256	11.5	119.5	61.7575	12233	201015L_YASAM07425_YAII63-13.raw	F4.9	2867.71	2166.5	2403.12	3019.56	2774.76	3678.4	3447.14	2632.76	1815.61	3038	3514.6	3615.83	4239.48	2543.98	3576.69	2239.56		3.96	1	FALSE	0.0001042	1.28e-05
High	Unambiguous	[R].dTSVEGSEMVPGk.[V]	N-Term(TMTpro); K13(TMTpro)	1	P18754	P18754	0	2	0.5028	0	1	1	972.515	1944.02	1944.02	-0.31	-0.0003	CID (Collision Induced Dissociation)	MS2	0	19	119.5	61.7489	12229	201015L_YASAM07425_YAII63-13.raw	F4.9	4613.23	3413.6	5702.53	5771.5	3992.91	6552.05	8231.42	4096.77	1405.01	2637.97	5715.68	6856.21	4614.69	6806.19	4429.29	3507.6		3.58	1	FALSE	0.0001042	2.609e-05
High	Unambiguous	[K].aQmVQEDLEk.[T]	N-Term(TMTpro); M3(Oxidation); K10(TMTpro)	1	P26038	P26038	0	2	0.3895	0	1	1	907.993	1814.98	1814.98	-0.94	-0.00085	CID (Collision Induced Dissociation)	MS2	16.9431	50.1	23.663	61.746	12227	201015L_YASAM07425_YAII63-13.raw	F4.9	12374.3	12152.3	12642.5	13315.2	9857.39	16665.6	18473.7	10812.6	4350.21	9537.71	14759.5	16597.3	12274	15609.1	13919.5	9548.37		3.62	1	FALSE	0.0001042	0.0001301
High	Unambiguous	[R].vHIEIGPDGR.[V]	N-Term(TMTpro)	3	P31943; P52597; P55795	P31943; P52597; P55795	0	3	0.7007	0	1	1	466.268	1396.79	1396.79	1	0.00047	CID (Collision Induced Dissociation)	MS2	27.2359	11.4	8.65	61.7193	12215	201015L_YASAM07425_YAII63-13.raw	F4.9	5524.64	3436.65	5282.96	4418.17	3563.7	6432.98	4308.8	4917.62	2245.81	5466.39	4717.92	4902.31	5187.26	4815.39	4244.37	4775.74		4.41	3	FALSE	0.0001042	1.347e-05
High	Unambiguous	[K].eNQIPEEAGSSGLGk.[A]	N-Term(TMTpro); K15(TMTpro)	1	Q15004	Q15004	0	3	0.429	0	1	1	708.72	2124.15	2124.14	1.28	0.0009	CID (Collision Induced Dissociation)	MS2	58.2571	13.2	21.759	61.7003	12207	201015L_YASAM07425_YAII63-13.raw	F4.9	3420.86	3644.8	4383.94	5154.45	4166.35	4997.69	5327.87	3036.41	1750.61	3207.23	6015.66	5865.69	4948.17	6187.81	4371.99	3817.54		3.24	1	FALSE	0.0001042	8.408e-05
High	Unambiguous	[K].eQGPYETYEGSPVSk.[G]	N-Term(TMTpro); K15(TMTpro)	1	P23921	P23921	0	2	0.4746	0	1	1	1140.09	2279.17	2279.17	0.44	0.00051	CID (Collision Induced Dissociation)	MS2	67.9213	11.3	72.74	61.6575	12188	201015L_YASAM07425_YAII63-13.raw	F4.9	2663.91	2820.08	2746.19	2887.92	2765.53	3632.6	2109.87	2040.05	1184.78	2550.64	3071.02	3358.4	2965.06	4003.58	2908.23	2309.81		4.72	1	FALSE	0.0001042	1.982e-06
High	Unambiguous	[K].eGMNIVEAmER.[F]	N-Term(TMTpro); M9(Oxidation)	1	P62937	P62937	0	2	0.472	0	1	1	799.895	1598.78	1598.78	-0.38	-0.00031	CID (Collision Induced Dissociation)	MS2	39.0934	31.3	5.12	61.6465	12181	201015L_YASAM07425_YAII63-13.raw	F4.9	46526.6	33978.9	43428.9	50138.4	37534	60383	57792.1	42442.6	9329.33	37429.1	46590.5	59768.8	38937.8	51901.9	42879.5	34236.9		3.22	1	FALSE	0.0001042	3.524e-05
High	Unambiguous	[K].eQQEPSSGGSVVPTVQEPk.[D]	N-Term(TMTpro); K19(TMTpro)	1	Q96JJ7	Q96JJ7	0	2	0.5012	0	1	1	1296.19	2591.38	2591.38	-1.01	-0.0013	CID (Collision Induced Dissociation)	MS2	0	1	119.5	61.6317	12176	201015L_YASAM07425_YAII63-13.raw	F4.9	484.304		870.492			680.631	540.014					741.364		812.746				4.11	1	FALSE	0.0001042	5.028e-05
High	Unambiguous	[K].gPGLYYVDEHGTR.[L]	N-Term(TMTpro)	1	P28062	P28062	0	3	0.6378	0	1	1	589.971	1767.9	1767.9	0.18	0.00011	CID (Collision Induced Dissociation)	MS2	14.6715	8.7	7.864	61.1059	11939	201015L_YASAM07425_YAII63-13.raw	F4.9	11556.7	9715.78	14886.5	12847.5	15461.3	11922.4	15376.9	9506.48	9063.63	12299.4	13259.9	16843	9464.39	9409.47	11361.1	7952.49		5.55	1	FALSE	0.0001042	1.091e-07
High	Unambiguous	[R].lQETSSQSYVEEQk.[Q]	N-Term(TMTpro); K14(TMTpro)	2	Q8N9T8	Q8N9T8; Q8N9T8	0	2	0.5745	0	1	1	1132.6	2264.19	2264.19	-0.08	-9e-05	CID (Collision Induced Dissociation)	MS2	16.7079	5.9	72.8	61.089	11932	201015L_YASAM07425_YAII63-13.raw	F4.9	1186.74	889.983	2075	1785.41	461.674	2104.69	2876.07	1354.57		829.763	2118.88	1854.01	850.16	2045.8	1543.33	730.751		6.11	1	TRUE	0.0001042	5.915e-07
High	Unambiguous	[K].nSNPALNDNLEk.[G]	N-Term(TMTpro); K12(TMTpro)	1	O00299	O00299	0	2	0.4465	0	1	1	969.031	1937.05	1937.06	-2.26	-0.00219	CID (Collision Induced Dissociation)	MS2	0	20.7	77.166	61.0812	11929	201015L_YASAM07425_YAII63-13.raw	F4.9	5112.65	4305.44	6324.96	5381.51	4820.33	6557.58	7381.48	6927.54	2664.37	4353.44	5273.09	6618.56	5232.97	6220.72	4846.64	3670.94		3.83	1	FALSE	0.0001042	0.0001183
High	Unambiguous	[K].gSGTAEVELk.[K]	N-Term(TMTpro); K10(TMTpro)	1	P14618	P14618	0	2	0.181	0	1	1	799.966	1598.92	1598.92	0.29	0.00023	CID (Collision Induced Dissociation)	MS2	14.7951	50.1	15.701	61.0521	11915	201015L_YASAM07425_YAII63-13.raw	F4.9	12527.8	9508.57	15364.7	12596.1	10916.3	17695.3	19557.1	14473.8	3196.69	10800	15275.3	16536	15131.8	19366.3	14734	9414.72		3.37	1	FALSE	0.0001042	0.0001617
High	Unambiguous	[K].lESEmEDAYHEHQANLLR.[Q]	N-Term(TMTpro); M5(Oxidation)	1	P23246	P23246	0	2	0.6886	0	1	1	1253.1	2505.2	2505.2	0.91	0.00114	CID (Collision Induced Dissociation)	MS2	0	0.4	119.5	60.4699	11655	201015L_YASAM07425_YAII63-13.raw	F4.9							436.754			511.216			506.733					4.56	1	FALSE	0.0001042	5.381e-05
High	Unambiguous	[K].vGGTSDVEVNEk.[K]	N-Term(TMTpro); K12(TMTpro)	1	P10809	P10809	0	2	0.4712	0	1	1	921.508	1842.01	1842.01	-0.51	-0.00047	CID (Collision Induced Dissociation)	MS2	0	37.5	24.366	60.4464	11645	201015L_YASAM07425_YAII63-13.raw	F4.9	8448.76	6299.3	8970.1	10716.4	7579.79	12890.5	13290	9760.34	2482.7	6978.33	9204.82	14190.7	10318.3	14119.8	9388.9	6509.98		3.99	1	FALSE	0.0001042	0.0002375
High	Unambiguous	[R].qQTQHAVEGDcDIHVLk.[Q]	N-Term(TMTpro); C11(Carbamidomethyl); K17(TMTpro)	1	P12763	P12763	0	3	0.548	0	1	1	862.79	2586.36	2586.36	-1.18	-0.00102	CID (Collision Induced Dissociation)	MS2	0	28.9	13.65	60.4439	11644	201015L_YASAM07425_YAII63-13.raw	F4.9	12556.4	10911.3	11354	11891.4	11076.7	14628.9	14136.9	11926.5	6155.06	10534.6	14455	13596	16303.9	11843.3	15619.6	9117.79		5.31	1	TRUE	0.0001042	7.207e-07
High	Unambiguous	[K].gDEcELLGHSk.[N]	N-Term(TMTpro); C4(Carbamidomethyl); K11(TMTpro)	1	P49411	P49411	0	3	0.5509	0	1	1	618.329	1852.97	1852.97	0.67	0.00042	CID (Collision Induced Dissociation)	MS2	0	17.1	4.467	60.4159	11628	201015L_YASAM07425_YAII63-13.raw	F4.9	28395.5	17120.2	29636.8	23319.9	22600.1	38350.5	31511.2	20732	6898.23	22360.4	28538.2	35645.8	20059.2	28080.5	27973.7	20427.5		4.03	1	FALSE	0.0001042	3.932e-06
High	Unambiguous	[R].sQSSIVPEEEQAANk.[G]	N-Term(TMTpro); K15(TMTpro)	1	Q969G3	Q969G3	0	2	0.5314	0	1	1	1113.1	2225.19	2225.19	-0.78	-0.00087	CID (Collision Induced Dissociation)	MS2	30.8913	5.2	67.904	60.3907	11616	201015L_YASAM07425_YAII63-13.raw	F4.9	1404.23	1604.98	1527.11	2874.88	975.584	2008.14	2082.49	1451.33		938.775	1042.83	664.441	1007.46	1186.39	1184.29	1068.17		5.42	1	FALSE	0.0001042	3.489e-06
High	Unambiguous	[R].nSEPAGLETPEAk.[V]	N-Term(TMTpro); K13(TMTpro)	1	P07814	P07814	0	2	0.2705	0	1	1	976.035	1951.06	1951.06	0.25	0.00024	CID (Collision Induced Dissociation)	MS2	68.6526	37.2	23.076	60.3387	11592	201015L_YASAM07425_YAII63-13.raw	F4.9	9029.15	6269.54	8559.15	10364	8163.29	14670.5	13952.1	8673.83	2713.89	6110.42	8930.09	12571.3	9617.37	14725.6	10458.2	5698.29		3.29	1	FALSE	0.0001042	9.503e-05
High	Unambiguous	[K].dINAYNcEEPTEk.[L]	N-Term(TMTpro); C7(Carbamidomethyl); K13(TMTpro)	1	P30041	P30041	0	2	0.5873	0	1	1	1096.04	2191.08	2191.08	-1.21	-0.00133	CID (Collision Induced Dissociation)	MS2	0	4.2	119.5	60.3204	11585	201015L_YASAM07425_YAII63-13.raw	F4.9	896.761	826.83	1505.01	1038.68		1492.42	1236.43	1028.3		731.788	1944.2	1638.53	1283.65	1771.08	748.012	937.146		4.58	1	FALSE	0.0001042	1.705e-06
High	Unambiguous	[R].yHTSQSGDEmTSLSEYVSR.[M]	N-Term(TMTpro); M10(Oxidation)	1	P08238	P08238	0	2	0.663	0	1	1	1249.08	2497.15	2497.15	-0.37	-0.00046	CID (Collision Induced Dissociation)	MS2	0	1.3	119.5	60.2833	11570	201015L_YASAM07425_YAII63-13.raw	F4.9	552.402	582.155	1019.4	492.398		805.458					664.296	887.447						5.49	1	FALSE	0.0001042	2.709e-05
High	Unambiguous	[K].sEPIPESNDGPVk.[V]	N-Term(TMTpro); K13(TMTpro)	1	P30101	P30101	0	2	0.5558	0	1	1	989.042	1977.08	1977.08	-1.18	-0.00117	CID (Collision Induced Dissociation)	MS2	0	19.2	78.63	60.2587	11561	201015L_YASAM07425_YAII63-13.raw	F4.9	4658.96	4089.6	6020.71	4575.16	3079.66	5972.92	6127.71	4200.75	2113.61	3229.8	5614.46	6188.44	4697.65	6630.9	4944.55	3267.9		3.94	1	FALSE	0.0001042	2.093e-05
High	Unambiguous	[K].iSTETEETEGSLHcck.[D]	N-Term(TMTpro); C14(Carbamidomethyl); C15(Carbamidomethyl); K16(TMTpro)	1	Q9Y4E8	Q9Y4E8	0	3	0.3508	0	1	1	830.409	2489.21	2489.21	-0.7	-0.00058	CID (Collision Induced Dissociation)	MS2	14.164	19.6	14.792	60.131	11512	201015L_YASAM07425_YAII63-13.raw	F4.9	9145.22	6432.64	10126.1	11175.9	8424.99	10022.3	11556.3	8271.26	3709.08	7233.2	9268.18	10401.3	9530.65	10118.1	11205.1	7158.75		3.82	1	FALSE	0.0001042	1.96e-05
High	Unambiguous	[K].qLQQAQAAGAEQEVEk.[F]	N-Term(TMTpro); K16(TMTpro)	1	P39748	P39748	0	2	0.6574	0	1	1	1168.64	2336.27	2336.27	-1.29	-0.00151	CID (Collision Induced Dissociation)	MS2	0	1.4	115.897	60.0498	11477	201015L_YASAM07425_YAII63-13.raw	F4.9	667.619	711.007	743.704		594.546		697.844				863.188	874.316	844.03					7.21	1	FALSE	0.0001042	3.711e-08
High	Unambiguous	[K].nEEPSEEEIDAPkPk.[K]	N-Term(TMTpro); K13(TMTpro); K15(TMTpro)	1	Q9NR30	Q9NR30	0	3	0.3545	0	1	1	875.48	2624.42	2624.42	0.5	0.00043	CID (Collision Induced Dissociation)	MS2	43.6242	46.4	27.556	60.0275	11468	201015L_YASAM07425_YAII63-13.raw	F4.9	7308.09	9275.46	13760.1	10312.8	8926.79	17994.4	18190.6	10347.5	1829.52	8109.18	12006.7	15617.5	12451.7	17511.5	13833.3	6603.88		3.3	1	FALSE	0.0001042	9.023e-05
High	Unambiguous	[K].vDVTEQPGLSGR.[F]	N-Term(TMTpro)	1	Q9H3N1	Q9H3N1	0	2	0.6158	0	1	1	781.43	1561.85	1561.85	0.95	0.00074	CID (Collision Induced Dissociation)	MS2	0	15	15.167	60.0232	11465	201015L_YASAM07425_YAII63-13.raw	F4.9	12428.2	12146.2	17021.5	18139.9	12594.5	19493.5	16342.9	16293.4	5502.77	9458.87	12378	17908.2	16591	21609	15327.8	12545.4		3.41	1	FALSE	0.0001042	4.055e-05
High	Unambiguous	[K].nEVAAEVAk.[L]	N-Term(TMTpro); K9(TMTpro)	1	P56192	P56192	0	2	0.3641	0	1	1	769.954	1538.9	1538.9	-1.2	-0.00092	CID (Collision Induced Dissociation)	MS2	36.7532	15	4.841	60.0018	11454	201015L_YASAM07425_YAII63-13.raw	F4.9	22977.9	13655.4	23263.9	21347.2	17626.9	26231.8	29310.9	16242.1	8780	12844	23516.1	24422.8	20693.3	27038.3	28597.1	13062.2		4.01	1	FALSE	0.0001042	0.0002657
High	Unambiguous	[K].eAHEPLAVADAk.[L]	N-Term(TMTpro); K12(TMTpro)	1	Q9Y2X3	Q9Y2X3	0	3	0.4761	0	1	1	620.356	1859.05	1859.05	0.21	0.00013	CID (Collision Induced Dissociation)	MS2	40.3654	13.7	3.108	59.9811	11444	201015L_YASAM07425_YAII63-13.raw	F4.9	22345	20251.7	27290.1	24692.4	18444.5	28546.9	29810.2	19813.9	12797.1	21084	26657.1	27616.4	14266.9	29135.2	18201.8	14727.7		3.55	1	FALSE	0.0001042	5.561e-05
High	Unambiguous	[R].lHEEGIIYR.[S]	N-Term(TMTpro)	1	P26640	P26640	0	3	0.5355	0	1	1	478.607	1433.81	1433.81	0.44	0.00021	CID (Collision Induced Dissociation)	MS2	40.0863	44.5	12.938	60.4931	11664	201015L_YASAM07425_YAII63-13.raw	F4.9	10973.6	11317.5	12891.2	13284.4	11432.8	14280	12564.4	10867.4	5127.8	9168.38	12143.3	14292.2	11228.6	11927.4	9306.02	9444.1		4.22	1	FALSE	0.0001042	0.0003271
High	Unambiguous	[K].gPSGcVESLEVTcR.[R]	N-Term(TMTpro); C5(Carbamidomethyl); C13(Carbamidomethyl)	1	P47897	P47897	0	2	0.5182	0	1	1	927.953	1854.9	1854.9	-0.84	-0.00078	CID (Collision Induced Dissociation)	MS2	21.9674	23.8	40.968	61.9281	12306	201015L_YASAM07425_YAII63-13.raw	F4.9	5840.35	6440.77	7524.42	6176.83	5656.51	6098.27	5684.23	6096.31	3548.65	5322.48	5929.42	6860.96	7121.94	7024.57	6329.4	4655.99		3.57	1	FALSE	0.0001042	0.0003155
High	Unambiguous	[K].mEEESGAPGVPSGNGAPGPk.[G]	N-Term(TMTpro); K20(TMTpro)	1	P52272	P52272	0	2	0.6353	0	1	1	1238.64	2476.26	2476.26	-0.05	-6e-05	CID (Collision Induced Dissociation)	MS2	0	1.5	119.5	60.5018	11668	201015L_YASAM07425_YAII63-13.raw	F4.9	953.315			747.466	493.119	856.878					674.437			979.035	1299.85			5.32	1	FALSE	0.0001042	2.215e-08
High	Unambiguous	[R].sDAGLESDTAMk.[K]	N-Term(TMTpro); K12(TMTpro)	1	Q9NR30	Q9NR30	0	2	0.5673	0	1	1	916.981	1832.95	1832.96	-0.56	-0.00052	CID (Collision Induced Dissociation)	MS2	15.7011	29.1	119.5	60.5374	11682	201015L_YASAM07425_YAII63-13.raw	F4.9	7419.45	4988.55	11288.9	7350.22	4493.95	9931.81	10633.6	6918.81	1884.57	5226.3	6670.86	10349.4	7381.91	10225	5321.12	5222.01		3.79	1	FALSE	0.0001042	7.007e-05
High	Unambiguous	[R].vHIPNDDAQFDASHcDSDk.[G]	N-Term(TMTpro); C15(Carbamidomethyl); K19(TMTpro)	1	Q16576	Q16576	0	4	0.5925	0	1	1	695.587	2779.33	2779.32	1.02	0.00071	CID (Collision Induced Dissociation)	MS2	61.8316	7	9.562	60.9855	11886	201015L_YASAM07425_YAII63-13.raw	F4.9	7313.09	3937.08	8803.33	5669.51	3305.3	7429.1	8804.05	5177.17		4579.3	9642.34	10327.2	7232.32	7739.38	8996.17	3101.23		3.73	1	FALSE	0.0001042	2.187e-08
High	Unambiguous	[R].gEGGILINSQGER.[F]	N-Term(TMTpro)	1	P31040	P31040	0	2	0.565	0	1	1	817.445	1633.88	1633.88	-0.08	-6e-05	CID (Collision Induced Dissociation)	MS2	0	28.3	5.646	60.9695	11877	201015L_YASAM07425_YAII63-13.raw	F4.9	15368	11621.8	12613.1	14354.6	9945	15361.8	16098.9	11617	5003.76	12428	15075.2	15861.1	8752	15438	7463.86	9710.03		4.46	1	FALSE	0.0001042	2.432e-06
High	Unambiguous	[K].mTTETASEDDNFGTAQSNk.[A]	N-Term(TMTpro); K19(TMTpro)	1	Q92616	Q92616	0	3	0.5966	0	1	1	885.76	2655.26	2655.27	-1.96	-0.00174	CID (Collision Induced Dissociation)	MS2	0	21.9	37.604	60.9358	11865	201015L_YASAM07425_YAII63-13.raw	F4.9	4789.21	3450.19	6030.59	5019.31	5771.44	7139.59	7705.35	4526.11	2250.66	3841.27	6110.37	8088.98	5798.1	6228.31	5766.34	3609.42		5.9	1	FALSE	0.0001042	1.842e-07
High	Unambiguous	[K].eEAEALYHSk.[Y]	N-Term(TMTpro); K10(TMTpro)	3	254622	P35908; 254622; 547754	0	2	0.2527	0	1	1	892.987	1784.97	1784.97	-0.67	-0.0006	CID (Collision Induced Dissociation)	MS2	38.8494	22.5	74.78	60.7585	11781	201015L_YASAM07425_YAII63-13.raw	F4.9	4677.27	3530.14	7512.82	7822.34	3976.94	5462.32	7639.18	5637.62	2260.82	3861.82	7899.22	8276.58	5660.44	7817.72	4220.46	3485.03		2.81	1	TRUE	0.0001042	0.0003794
High	Unambiguous	[K].dALSSVQESQVAQQAR.[G]	N-Term(TMTpro)	1	P02656	P02656	0	2	0.5578	0	1	1	1011.03	2021.06	2021.06	-1.5	-0.00152	CID (Collision Induced Dissociation)	MS2	0	19.2	116.877	60.7006	11758	201015L_YASAM07425_YAII63-13.raw	F4.9	3905.61	4428.29	4043.84	3710.52	4525.86	5536.62	6153.99	5471.12	1877.86	4502.4	5034.09	6383.35	5963.78	5106.72	4745.08	4519.81		3.98	1	FALSE	0.0001042	4.353e-05
High	Unambiguous	[K].eEAEALYHSk.[Y]	N-Term(TMTpro); K10(TMTpro)	3	254622	P35908; 254622; 547754	0	3	0.3059	0	1	1	595.661	1784.97	1784.97	0.59	0.00035	CID (Collision Induced Dissociation)	MS2	0	27.8	2.955	60.677	11747	201015L_YASAM07425_YAII63-13.raw	F4.9	21963.3	14770.6	36542	34056.8	25292.4	17678.2	21112.4	19574	8190.24	14276.5	28594.1	35378	20608.8	41722.8	16998.5	15713.1		3.53	1	TRUE	0.0001042	0.0003943
High	Unambiguous	[K].nTGVILANDANAER.[L]	N-Term(TMTpro)	1	P46087	P46087	0	2	0.5829	0	1	1	881.474	1761.94	1761.94	-0.75	-0.00066	CID (Collision Induced Dissociation)	MS2	0	40.1	14.611	60.6714	11744	201015L_YASAM07425_YAII63-13.raw	F4.9	9741.24	9946.12	12237.6	12741.1	9191.32	11895	11076	9680.29	4600.77	9230.88	9273.05	12239.9	10881.5	10890.9	10212.2	9802.48		4.34	1	FALSE	0.0001042	1.724e-06
High	Unambiguous	[K].eAQELSQNSAIk.[Q]	N-Term(TMTpro); K12(TMTpro)	1	Q9NR30	Q9NR30	0	2	0.2652	0	1	1	963.542	1926.08	1926.08	-0.57	-0.00055	CID (Collision Induced Dissociation)	MS2	24.1728	25.5	30.461	60.6594	11739	201015L_YASAM07425_YAII63-13.raw	F4.9	6844.07	5717.65	6968.04	5296.84	6004.26	7715.9	8745.87	6470.41	2186.34	5081.79	8425.45	7250.51	7645.91	6812.54	6788.43	5323.78		3.96	1	FALSE	0.0001042	7.688e-05
High	Unambiguous	[K].eVDEQmLNVQNk.[N]	N-Term(TMTpro); M6(Oxidation); K12(TMTpro)	4	P07437; P68371	Q13885; P07437; P68371; Q9BVA1	0	2	0.4276	0	1	1	1036.05	2071.1	2071.1	-0.99	-0.00102	CID (Collision Induced Dissociation)	MS2	0	14.4	109.614	60.6562	11738	201015L_YASAM07425_YAII63-13.raw	F4.9	2578.45	3547.24	3169.66	3530.32	3360.09	4288.24	4405.93	3355.18	1247.47	2758.57	4425.62	4413.71	4756.82	4343.41	3187.73	3096.46		4.42	2	FALSE	0.0001042	7.914e-05
High	Unambiguous	[K].lESEmEDAYHEHQANLLR.[Q]	N-Term(TMTpro); M5(Oxidation)	1	P23246	P23246	0	3	0.3651	0	1	1	835.737	2505.2	2505.2	-0.95	-0.00079	CID (Collision Induced Dissociation)	MS2	0	23.1	23.854	60.6324	11727	201015L_YASAM07425_YAII63-13.raw	F4.9	5292.59	4885.37	6251.73	5169.87	5167.89	7765	7076.1	4979.89	2883.69	5033.95	7116.66	5435.42	5425.34	8022.26	6276.04	4514.85		3.67	1	FALSE	0.0001042	5.584e-05
High	Unambiguous	[R].sTAYEDYYYHPPPR.[M]	N-Term(TMTpro)	1	O43390	O43390	0	3	0.8285	0	1	1	688.332	2062.98	2062.98	-0.34	-0.00023	CID (Collision Induced Dissociation)	MS2	10.0986	7.4	3.702	60.6249	11723	201015L_YASAM07425_YAII63-13.raw	F4.9	8774.3	11466.7	17158.8	15064.9	13313.3	17530.4	21204.6	10576.9	5906.66	12185.7	19747.8	17954.9	13772.5	14740.6	30457.7	13592.6		4.78	1	FALSE	0.0001042	1.076e-05
High	Unambiguous	[K].aASGFNAmEDAQTLR.[K]	N-Term(TMTpro); M8(Oxidation)	1	P09525	P09525	0	2	0.4795	0	1	1	951.47	1901.93	1901.93	-1.36	-0.00129	CID (Collision Induced Dissociation)	MS2	0	17.1	61.933	60.5944	11710	201015L_YASAM07425_YAII63-13.raw	F4.9	5586.69	4904.02	3968.31	6254.76	3300.74	4938.9	4935.19	2988.36	1476.93	4542.06	4078.54	4263.22	3631.59	5029.64	4311.26	3749.83		3.65	1	FALSE	0.0001042	4.975e-05
High	Unambiguous	[R].lQAVTDDHIR.[M]	N-Term(TMTpro)	1	P30043	P30043	0	3	0.5873	0	1	1	491.278	1471.82	1471.82	-0.34	-0.00017	CID (Collision Induced Dissociation)	MS2	30.857	23.8	17.468	60.5696	11696	201015L_YASAM07425_YAII63-13.raw	F4.9	10032.9	7601.03	11793.2	11454.4	7764.14	10437.2	10171	8343.5	5328.11	10068	11461	10686.5	8092.39	11190.4	8419.8	9427.68		3.95	1	FALSE	0.0001042	6.66e-06
High	Unambiguous	[R].sTAYEDYYYHPPPR.[M]	N-Term(TMTpro)	1	O43390	O43390	0	2	0.6929	0	1	1	1031.99	2062.98	2062.98	-0.48	-0.00049	CID (Collision Induced Dissociation)	MS2	40.9434	9.1	119.5	60.554	11690	201015L_YASAM07425_YAII63-13.raw	F4.9	1721.53	1763.09	2802.4	1902.14	2972.7	2831.02	3616.93	2568.35		1368.71	1980.07	3008.41	2896.72	3850.94	1851.46	1875.56		3.81	1	FALSE	0.0001042	9.156e-05
High	Unambiguous	[K].dALSSVQESQVAQQAR.[G]	N-Term(TMTpro)	1	P02656	P02656	0	2	0.5663	0	1	1	1011.03	2021.06	2021.06	0.01	1e-05	CID (Collision Induced Dissociation)	MS2	63.7364	19.9	76.704	60.5425	11684	201015L_YASAM07425_YAII63-13.raw	F4.9	4440.86	2993.36	5880.03	4255.37	3471.88	4456.38	6070.9	4347.07	1318.1	5235.86	5311.81	7318.39	6603.57	6548.82	4546.98	4909.92		3.92	1	FALSE	0.0001042	1.241e-05
High	Unambiguous	[K].gDEcELLGHSk.[N]	N-Term(TMTpro); C4(Carbamidomethyl); K11(TMTpro)	1	P49411	P49411	0	2	0.5217	0	1	1	926.988	1852.97	1852.97	-1.52	-0.00141	CID (Collision Induced Dissociation)	MS2	45.2361	22.3	55.886	60.5201	11675	201015L_YASAM07425_YAII63-13.raw	F4.9	6383.5	5127.39	5944.66	5979.11	3808.54	6997.56	7125.76	5568.18	1942.65	5295.61	5998.89	6879.41	6148.12	6527.92	5817.94	4557.72		3.68	1	FALSE	0.0001042	0.0001608
High	Unambiguous	[K].hFIDVGAGVIDEDYR.[G]	N-Term(TMTpro)	1	P33316	P33316	0	3	0.6477	0	1	1	670.681	2010.03	2010.03	1.77	0.00118	CID (Collision Induced Dissociation)	MS2	6.23529	1.5	47.467	69.8545	14804	201015L_YASAM07425_YAII63-13.raw	F4.9		557.521	719.677	1345.87	543.536	722.002	905.28				610.462	679.474						5.45	1	FALSE	0.0001042	3.157e-07
High	Unambiguous	[K].dLLHPSPEEEk.[R]	N-Term(TMTpro); K11(TMTpro)	1	P42677	P42677	0	3	0.4194	0	1	1	634.687	1902.05	1902.05	0.04	2e-05	CID (Collision Induced Dissociation)	MS2	12.0615	18.1	5.539	61.9492	12315	201015L_YASAM07425_YAII63-13.raw	F4.9	20111.1	20123.2	30368.5	26592.9	27240.2	35948	35412	20618.3	6885.4	11016.8	25547.6	30312.6	18290.4	34603.8	27350.1	15983.3		3.72	1	FALSE	0.0001042	6.596e-05
High	Unambiguous	[R].aEcMLQQAER.[L]	N-Term(TMTpro); C3(Carbamidomethyl)	1	P13796	P13796	0	2	0.4343	0	1	1	770.383	1539.76	1539.76	-0.08	-6e-05	CID (Collision Induced Dissociation)	MS2	42.7348	25.6	4.957	61.9971	12336	201015L_YASAM07425_YAII63-13.raw	F4.9	35548.7	31523.1	36577.5	42486.1	22906.9	42743.3	39907.5	32842.1	13343.7	21502	35703.7	45939.8	28582.7	42080.1	41387.7	23200.5		2.97	1	FALSE	0.0001042	0.0003214
High	Unambiguous	[K].gGAAVDPDSGLEHSAHVLEk.[G]	N-Term(TMTpro); K20(TMTpro)	1	P09874	P09874	0	3	0.5367	0	1	1	866.464	2597.38	2597.38	-1.22	-0.00106	CID (Collision Induced Dissociation)	MS2	63.8889	31.6	28.492	63.206	12862	201015L_YASAM07425_YAII63-13.raw	F4.9	7727.44	5399.47	9780.61	7175.35	8080.2	10032.3	9589.18	7501.78	2847.5	6938.33	9226.15	10617.5	8371.25	9794.39	8585.5	6667.65		5.31	1	FALSE	0.0001042	6.625e-06
High	Unambiguous	[K].iAFGGETDEATR.[Y]	N-Term(TMTpro)	1	P51648	P51648	0	2	0.4481	0	1	1	785.904	1570.8	1570.8	-1.83	-0.00144	CID (Collision Induced Dissociation)	MS2	9.61243	23.1	20.229	63.2027	12860	201015L_YASAM07425_YAII63-13.raw	F4.9	5223.73	4589.21	7124.65	5806.67	5652.32	6462.18	6473.3	7065.19	1622.47	5269.75	6624.97	6811.5	5994.91	7309.41	5668.01	6063.11		3.08	1	FALSE	0.0001042	0.000333
High	Unambiguous	[K].eDGQEYAQVIk.[M]	N-Term(TMTpro); K11(TMTpro)	2	P47813	P47813; O14602	0	2	0.4393	0	1	1	944.52	1888.03	1888.03	0.67	0.00063	CID (Collision Induced Dissociation)	MS2	45.2511	22.6	119.5	63.1531	12840	201015L_YASAM07425_YAII63-13.raw	F4.9	6142.6	3896.71	5769.73	5169.18	5247.75	7426.51	7202.54	4645.12	2159.75	4133.22	7084.14	7320.19	5187.02	7155.57	5844.08	4081.5		3.46	1	FALSE	0.0001042	0.0002569
High	Unambiguous	[K].gGAAVDPDSGLEHSAHVLEk.[G]	N-Term(TMTpro); K20(TMTpro)	1	P09874	P09874	0	4	0.592	0	1	1	650.099	2597.38	2597.38	-2.26	-0.00147	CID (Collision Induced Dissociation)	MS2	12.8434	17.1	8.148	63.1176	12825	201015L_YASAM07425_YAII63-13.raw	F4.9	5990.41	4129.07	5475.9	5108.41	5143.8	6134.61	7228.88	4190.72	2726.63	5401.32	5892.39	5906.28	6079.22	6533.1	5495.81	4259.09		4.02	1	FALSE	0.0001042	1.762e-05
High	Unambiguous	[R].eDQSILcTGESGAGk.[T]	N-Term(TMTpro); C7(Carbamidomethyl); K15(TMTpro)	4	P35579	P35580; P35749; P35579; Q7Z406	0	2	0.5878	0	1	1	1080.56	2160.11	2160.11	-2.1	-0.00227	CID (Collision Induced Dissociation)	MS2	17.8941	13	119.5	63.1142	12824	201015L_YASAM07425_YAII63-13.raw	F4.9	3201.8	2525.02	3653.31	3733.93	2328.89	4502.24	4829.21	3311.8	770.084	2505.33	3543.88	4989.47	2992.2	4053.11	2018.86	2162.04		5.75	1	FALSE	0.0001042	1.804e-08
High	Unambiguous	[K].mDSTANEVEAVk.[V]	N-Term(TMTpro); K12(TMTpro)	1	P07237	P07237	0	2	0.5037	0	1	1	951.509	1902.01	1902.01	-1.56	-0.00149	CID (Collision Induced Dissociation)	MS2	0	33.9	74.27	63.0651	12804	201015L_YASAM07425_YAII63-13.raw	F4.9	7564.08	6384.33	8224.47	7324.65	7052	9878.05	12756.9	7875.67	1525.82	6855.3	9221.34	10933	9325.39	11335.6	10664.9	5175.41		4.07	1	FALSE	0.0001042	0.0003215
High	Unambiguous	[K].sEFEQNLSEk.[L]	N-Term(TMTpro); K10(TMTpro)	1	Q16891	Q16891	0	2	0.3664	0	1	1	909.99	1818.97	1818.97	0.29	0.00026	CID (Collision Induced Dissociation)	MS2	43.4451	33.5	50.907	63.2136	12866	201015L_YASAM07425_YAII63-13.raw	F4.9	7505.84	7072.81	9628.1	8689.09	6198.79	10376.9	11041.1	8598.8	2719.28	7323.54	10003.8	10244.5	8919.94	11588.5	8913.01	6163.65		2.62	1	FALSE	0.0001042	0.000277
High	Unambiguous	[R].lQETLSAADR.[C]	N-Term(TMTpro)	1	P78527	P78527	0	2	0.0993	0	1	1	704.392	1407.78	1407.78	0.79	0.00056	CID (Collision Induced Dissociation)	MS2	18.4212	24.4	8.157	63.0382	12792	201015L_YASAM07425_YAII63-13.raw	F4.9	10262.4	8768.48	9040.66	9712.38	8297.39	10836.3	10666.7	8113.48	3376.58	7971.17	12411.2	9836.37	8153.08	9289.11	9842.75	7854.76		2.92	1	FALSE	0.0001042	0.0001414
High	Unambiguous	[R].yHTSQSGDEmTSLSEYVSR.[M]	N-Term(TMTpro); M10(Oxidation)	1	P08238	P08238	0	3	0.747	0	1	1	833.054	2497.15	2497.15	-0.18	-0.00015	CID (Collision Induced Dissociation)	MS2	9.19671	18.6	15.596	62.9661	12759	201015L_YASAM07425_YAII63-13.raw	F4.9	5477.84	4361.69	4069.05	5375.46	3677.12	4971.05	5812.84	4098.04	2285.29	4621.28	5857.58	5582	4179.93	5756.14	6026.73	3796.92		6.6	1	FALSE	0.0001042	3.004e-06
High	Unambiguous	[K].wQPGEEPAGSVVQDSR.[L]	N-Term(TMTpro)	1	Q9Y5K5	Q9Y5K5	0	2	0.5035	0	1	1	1023.51	2046.02	2046.02	-1.72	-0.00176	CID (Collision Induced Dissociation)	MS2	0	21.3	46.401	62.9613	12757	201015L_YASAM07425_YAII63-13.raw	F4.9	6208.6	3888.94	6384.24	6455.17	4694.58	5205.26	6773.93	4848.54	2096.3	5975.94	6361.67	6472.93	5420.11	7192.03	5105.63	3965.68		4.23	1	FALSE	0.0001042	8.239e-06
High	Unambiguous	[K].gDQENVHPDVMLVQPR.[V]	N-Term(TMTpro)	1	Q14974	Q14974	0	3	0.6879	0	1	1	713.372	2138.1	2138.1	0.86	0.00061	CID (Collision Induced Dissociation)	MS2	7.24457	8.2	6.054	62.9575	12755	201015L_YASAM07425_YAII63-13.raw	F4.9	9352.98	8429.76	8051.19	8234.79	8250.04	9972.19	9339.73	8352.63	3095.59	7719.5	12206	11125.6	8625.52	7737.89	9382.03	8100.83		4.71	1	FALSE	0.0001042	2.943e-05
High	Unambiguous	[K].gLSDTPYDSSASYEk.[E]	N-Term(TMTpro); K15(TMTpro)	1	Q13422	Q13422	0	2	0.573	0	1	1	1114.56	2228.12	2228.12	-0.02	-2e-05	CID (Collision Induced Dissociation)	MS2	0	6.5	72.95	62.9457	12751	201015L_YASAM07425_YAII63-13.raw	F4.9	884.224	1839.96	1151.94	1216.07	1312.94	1501.89	2546.97	1058.73	878.294	1007.41	2212.11	2834.68	1895.84	2510.33	1145	892.564		5.34	1	FALSE	0.0001042	5.625e-07
High	Unambiguous	[K].gDQENVHPDVMLVQPR.[V]	N-Term(TMTpro)	1	Q14974	Q14974	0	2	0.595	0	1	1	1069.55	2138.1	2138.1	-0.76	-0.00081	CID (Collision Induced Dissociation)	MS2	0	10	114.766	62.9424	12750	201015L_YASAM07425_YAII63-13.raw	F4.9	3364.08	1688.72	1959.3	3050.27	1848.29	3283.63	2964.3	2556.07	1006.44	2049.23	2836.6	4038.51	2519.61	2566.73	2608.54	1779.79		4.37	1	FALSE	0.0001042	6.616e-06
High	Unambiguous	[K].lEPQIASASEYAHR.[G]	N-Term(TMTpro)	1	O60664	O60664	0	3	0.4724	0	1	1	626.003	1876	1875.99	3.9	0.00244	CID (Collision Induced Dissociation)	MS2	43.2921	5.1	10.877	62.9162	12739	201015L_YASAM07425_YAII63-13.raw	F4.9	2181.41	3334.93	2614.02	3021.57	2746.18	4347.89	5683.61	4072.07	1504.97	2498.62	3720.91	2716.79	2513.42	4578	3010.06	3252.68		3.98	1	FALSE	0.0001042	2.361e-06
High	Unambiguous	[R].tSTMQDETLNSSVQSIR.[T]	N-Term(TMTpro)	1	P32519	P32519	0	2	0.4543	0	1	1	1101.06	2201.1	2201.1	-0.04	-4e-05	CID (Collision Induced Dissociation)	MS2	0	7.7	119.5	62.9868	12768	201015L_YASAM07425_YAII63-13.raw	F4.9	1341.45	2406.26	1180.5	2254.94	1321.66	2333.46	2146.45	1379.82	1213.48	1731.62	1948.89	2487.68	2158.06	2239.67	2451.67	809.345		3.83	1	FALSE	0.0001042	0.0003558
High	Unambiguous	[K].yELISETGGSHDk.[R]	N-Term(TMTpro); K13(TMTpro)	2	Q12906	Q12906; Q96SI9	0	3	0.3362	0	1	1	682.034	2044.09	2044.08	2.27	0.00155	CID (Collision Induced Dissociation)	MS2	40.6423	12.1	13.271	63.2673	12885	201015L_YASAM07425_YAII63-13.raw	F4.9	4472.91	4048.69	3621.65	5200.04	4757.94	4764.54	6100.27	4213	957.016	3237.2	4605.41	7199.68	3479.46	5179.37	4921.79	3081.81		3.54	1	FALSE	0.0001042	5.362e-05
High	Unambiguous	[K].mDSTANEVEAVk.[V]	N-Term(TMTpro); K12(TMTpro)	1	P07237	P07237	0	3	0.1602	0	1	1	634.677	1902.02	1902.01	1.8	0.00114	CID (Collision Induced Dissociation)	MS2	0	13.3	10.857	63.3442	12918	201015L_YASAM07425_YAII63-13.raw	F4.9	9674.45	6158	10574.4	9530.92	6515.49	10393.2	11673.7	7808.61	2435.26	6164.68	9438.42	9925.77	7925.88	11891.9	10012.8	5626.89		2.31	1	FALSE	0.0001042	0.0001778
High	Unambiguous	[K].gEATVSFDDPPSAk.[A]	N-Term(TMTpro); K14(TMTpro)	2	P35637; Q92804	P35637; Q92804	0	2	0.5722	0	1	1	1015.04	2029.07	2029.07	-1.18	-0.00119	CID (Collision Induced Dissociation)	MS2	19.5502	27.6	86.04	63.3671	12928	201015L_YASAM07425_YAII63-13.raw	F4.9	6338.76	5981.57	6753.55	7100.16	6164.21	10492.3	10279.1	6586.5	949.244	5424.6	7990.45	9281.2	6277.83	9343.11	7186.18	5077.44		3.95	2	FALSE	0.0001042	2.351e-06
High	Unambiguous	[K].gPPDFSSDEEREPTPVLGSGAAAAGR.[S]	N-Term(TMTpro)	2	P42167; P42166	P42167; P42166	1	3	0.6973	0	1	1	958.811	2874.42	2874.42	0.14	0.00013	CID (Collision Induced Dissociation)	MS2	0	35.6	16.718	63.6622	13056	201015L_YASAM07425_YAII63-13.raw	F4.9	7341.97	7740.44	8771.97	9417.1	7413.66	11184.5	11231.2	8543.74	3612.26	8718.51	9285.45	9970.7	9261.6	10464.5	10851.6	7986.4		5.55	2	FALSE	0.0001042	2.049e-05
High	Unambiguous	[K].tLNEADcATVPPAIR.[S]	N-Term(TMTpro); C7(Carbamidomethyl)	1	P31040	P31040	0	2	0.5979	0	1	1	966.513	1932.02	1932.02	0.01	1e-05	CID (Collision Induced Dissociation)	MS2	21.1983	14.5	86.39	63.6466	13050	201015L_YASAM07425_YAII63-13.raw	F4.9	3942.01	3237.38	3336.19	3570.48	3786.45	3834.73	3912.16	3343.35	2393.5	4261.85	4697.31	4419.83	4938.23	3282.46	3251.81	2839.97		3.73	1	FALSE	0.0001042	5.543e-06
High	Unambiguous	[K].vATLNSEEESDPPTYk.[D]	N-Term(TMTpro); K16(TMTpro)	1	Q00341	Q00341	0	2	0.5447	0	1	1	1194.62	2388.24	2388.24	-1.07	-0.00128	CID (Collision Induced Dissociation)	MS2	57.334	6.4	119.5	63.6413	13048	201015L_YASAM07425_YAII63-13.raw	F4.9	683.31	1952.21	1133.24	1091.73	1209.63	2634.6	1809.42	1717.34		1480.77	1771.75	2716.42	2184.33	2114.69	1752.59	1483.65		3.8	1	FALSE	0.0001042	5.62e-08
High	Unambiguous	[K].eALEPSGENVIQNk.[E]	N-Term(TMTpro); K14(TMTpro)	1	O75477	O75477	0	2	0.4295	0	1	1	1068.59	2136.18	2136.18	-0.44	-0.00047	CID (Collision Induced Dissociation)	MS2	12.5209	12	73.31	63.6081	13035	201015L_YASAM07425_YAII63-13.raw	F4.9	2659.48	2717.58	3119.78	3348.04	2480.94	3437.65	4218.32	2994.29	662.678	2303.96	3312.63	4051.12	3494.84	3396.4	2694	1704.84		4.75	1	FALSE	0.0001042	3.819e-06
High	Unambiguous	[R].vDSAATSGYEIGNPPDYR.[G]	N-Term(TMTpro)	1	P24666	P24666	0	2	0.5947	0	1	1	1108.54	2216.08	2216.08	0.26	0.00029	CID (Collision Induced Dissociation)	MS2	0	7	72.98	63.5936	13030	201015L_YASAM07425_YAII63-13.raw	F4.9	1390.52	1877.34	2096.37	2456.12	1937.07	1399.07	1638.32	2137.04		2189.61	2135.23	2057.99	1787.35	1666.73	1519.38	1138.19		5.7	1	FALSE	0.0001042	5.743e-07
High	Unambiguous	[R].yAPSEAGLHEMDIR.[Y]	N-Term(TMTpro)	1	P21333	P21333	0	3	0.4521	0	1	1	631.655	1892.95	1892.95	0.8	0.00051	CID (Collision Induced Dissociation)	MS2	7.21436	9.1	5.396	63.566	13017	201015L_YASAM07425_YAII63-13.raw	F4.9	6561.98	6167.15	8811.11	4283.39	5898.73	9778.65	10896.8	4761.52	3325.83	4235.06	7320.52	7863.53	6608.84	9758.25	5880.62	6570.44		2.92	1	FALSE	0.0001042	0.0002417
High	Unambiguous	[R].aTAPVPTVGEGYGYGHESELSQASAAAR.[N]	N-Term(TMTpro)	1	Q9BWF3	Q9BWF3	0	3	0.6826	0	1	1	1027.51	3080.52	3080.52	-1.36	-0.00139	CID (Collision Induced Dissociation)	MS2	18.1994	8.6	119.5	63.517	12994	201015L_YASAM07425_YAII63-13.raw	F4.9	1792.74	1691.98	2015.64	2497.9	2226.55	2795.28	2800.66	1710.97	1205.7	2389.12	2897.9	1711.71	1974.68	2511.92	2861.66	1881.76		6.9	1	FALSE	0.0001042	7.508e-07
High	Unambiguous	[K].eRPTPSLNNNcTTSEDSLVLYNR.[V]	N-Term(TMTpro); C11(Carbamidomethyl)	1	P07814	P07814	0	3	0.6124	0	1	1	995.496	2984.47	2984.47	0.85	0.00085	CID (Collision Induced Dissociation)	MS2	32.7591	9.7	73.91	63.4945	12984	201015L_YASAM07425_YAII63-13.raw	F4.9	2104.89	2603.77	2641.8	3478.1	2453.42	3071.62	3295.2	1966.31	1509.04	2035.87	2806.73	2162.73	3429.49	2618.14	2078.77	2176.05		4.85	1	FALSE	0.0001042	3.77e-05
High	Unambiguous	[K].eDGQEYAQVIk.[M]	N-Term(TMTpro); K11(TMTpro)	2	P47813	P47813; O14602	0	2	0.5085	0	1	1	944.519	1888.03	1888.03	0.28	0.00027	CID (Collision Induced Dissociation)	MS2	43.6323	52.1	32.44	63.482	12978	201015L_YASAM07425_YAII63-13.raw	F4.9	13457.6	8777.33	13101.7	14636.2	8824.29	20660	20704.4	12556.8	3360.84	9920.26	12804.2	20423.3	11602.8	21455.7	13132.4	8348.79		4.68	1	FALSE	0.0001042	3.76e-05
High	Unambiguous	[R].mDSTNADALYVR.[G]	N-Term(TMTpro)	1	Q99615	Q99615	0	2	0.2337	0	1	1	830.42	1659.83	1659.83	-0.12	-0.0001	CID (Collision Induced Dissociation)	MS2	0	26.4	19.285	63.4591	12968	201015L_YASAM07425_YAII63-13.raw	F4.9	6522.39	5677.46	8344.06	7481.26	5947.44	7164.53	6384.87	7213.25	3144.58	6532.88	8546.88	8360.41	6949.12	7310.68	6822.74	5865.89		2.91	1	FALSE	0.0001042	0.0002157
High	Unambiguous	[K].yIDQEELNk.[T]	N-Term(TMTpro); K9(TMTpro)	4	P07900; P08238	P07900; P08238; Q58FF8; Q14568	0	3	0.2525	0	1	1	587.329	1759.97	1759.97	0.43	0.00025	CID (Collision Induced Dissociation)	MS2	0	25.9	5.981	63.4568	12966	201015L_YASAM07425_YAII63-13.raw	F4.9	11405.7	8154.94	13256.9	12993.1	11292.5	18243.3	18621.6	11586.4	2731.71	11220.6	9088.32	13845.3	11540.9	17169.1	14217	8592.93		3.96	2	FALSE	0.0001042	1.585e-05
High	Unambiguous	[K].tEDLEATSEHFk.[T]	N-Term(TMTpro); K12(TMTpro)	1	Q9BV40	Q9BV40	0	2	0.4325	0	1	1	1008.03	2015.05	2015.06	-1.47	-0.00148	CID (Collision Induced Dissociation)	MS2	52.2216	22	73.534	63.4447	12962	201015L_YASAM07425_YAII63-13.raw	F4.9	5003.25	4301.28	5626.37	4249.59	4685.55	7086.52	8091.93	6138.84	2045.52	4103.8	5601.13	8510.72	7237.24	7385.17	6511.29	2955.35		4.67	1	FALSE	0.0001042	1.683e-05
High	Unambiguous	[K].wHEEVEIYR.[Q]	N-Term(TMTpro)	1	P15497	P15497	0	3	0.6925	0	1	1	522.275	1564.81	1564.81	1.79	0.00093	CID (Collision Induced Dissociation)	MS2	13.9784	12.5	22.934	63.4194	12951	201015L_YASAM07425_YAII63-13.raw	F4.9	3464.05	2773.61	3556.78	3339.52	2524.3	3170.36	3329.99	3885.28	1169.64	3142.26	2931.3	3490.98	3896.31	3491.51	3674.37	1807.57		3.74	1	TRUE	0.0001042	0.0003419
High	Unambiguous	[K].eELQSGVDAANSAAQQYQR.[R]	N-Term(TMTpro)	1	P46940	P46940	0	3	0.5994	0	1	1	790.393	2369.17	2369.17	-0.1	-8e-05	CID (Collision Induced Dissociation)	MS2	74.3992	15.8	17.408	63.4127	12948	201015L_YASAM07425_YAII63-13.raw	F4.9	4081.93	4845.39	4425.65	3791	3738.09	6276.88	4835.12	4533.69	2398.24	3769.28	5855.77	5445.29	5112.32	5758.8	5692.53	4126.23		6.84	1	FALSE	0.0001042	4.128e-09
High	Unambiguous	[K].tEDLEATSEHFk.[T]	N-Term(TMTpro); K12(TMTpro)	1	Q9BV40	Q9BV40	0	3	0.5165	0	1	1	672.358	2015.06	2015.06	0.28	0.00019	CID (Collision Induced Dissociation)	MS2	0	20.9	6.184	63.4038	12943	201015L_YASAM07425_YAII63-13.raw	F4.9	11448.5	11194.5	17978.2	15257.4	11910.7	17766.8	22659.5	13344.2	3544.15	10745.2	16265.9	21235.6	18189.1	19622.3	20047.3	9012.27		4.86	1	FALSE	0.0001042	1.16e-06
High	Unambiguous	[K].gTILISSEEGETEANNHk.[K]	N-Term(TMTpro); K18(TMTpro)	1	Q9UBT2	Q9UBT2	0	3	0.6312	0	1	1	846.449	2537.33	2537.33	-0.52	-0.00044	CID (Collision Induced Dissociation)	MS2	0	25.6	15.552	62.9121	12736	201015L_YASAM07425_YAII63-13.raw	F4.9	9410.75	7162.79	9332.09	11253.8	8443.86	13468	12445.4	11171.7	2550.66	8544.1	10821.5	13315.3	9550.76	11510.2	10623	8442.28		5.83	1	FALSE	0.0001042	1.602e-11
High	Unambiguous	[R].iDSANmNDDITTSLR.[G]	N-Term(TMTpro); M6(Oxidation)	1	Q9Y2L1	Q9Y2L1	0	2	0.497	0	1	1	993.49	1985.97	1985.98	-1.68	-0.00167	CID (Collision Induced Dissociation)	MS2	37.7336	15.2	73.94	62.8993	12731	201015L_YASAM07425_YAII63-13.raw	F4.9	3367.84	4228.19	4516.59	3927.29	2827.07	5249.79	5005.73	2404.46	1336.99	3481.94	3942.98	4199.81	2958.52	5227.91	3348.3	3134.53		3.28	1	FALSE	0.0001042	3.382e-05
High	Unambiguous	[K].aAVEDSGTTVETIk.[L]	N-Term(TMTpro); K14(TMTpro)	1	Q5VTR2	Q5VTR2	0	2	0.4323	0	1	1	1015.07	2029.13	2029.13	0.32	0.00032	CID (Collision Induced Dissociation)	MS2	73.2392	13.1	36.918	62.8924	12728	201015L_YASAM07425_YAII63-13.raw	F4.9	2808.12	3698.21	3192.35	3168.03	2258.14	4710.5	3741.34	3031.22	1348.16	2355.06	3009.82	2963.52	4219.88	4056.68	3601.43	2555.48		4.58	1	FALSE	0.0001042	1.706e-05
High	Unambiguous	[K].eYIPGQPPLSQSSDSSPTR.[N]	N-Term(TMTpro)	1	P07814	P07814	0	2	0.6047	0	1	1	1175.59	2350.18	2350.18	-1.02	-0.0012	CID (Collision Induced Dissociation)	MS2	0	3.3	72.44	62.8708	12720	201015L_YASAM07425_YAII63-13.raw	F4.9	1061.61	773.578	633.297	918.317	773.056	726.104	1037.86	578.616	565.016	763.668	603.184	1283.45	484.894	1689.21	534.551	855.192		4.25	1	FALSE	0.0001042	1.778e-05
High	Unambiguous	[K].eDGLAQQQTQLNLR.[S]	N-Term(TMTpro)	1	P49327	P49327	0	3	0.3947	0	1	1	640.016	1918.03	1918.03	1	0.00064	CID (Collision Induced Dissociation)	MS2	64.7512	9.4	13.832	62.3883	12507	201015L_YASAM07425_YAII63-13.raw	F4.9	2649.94	2981.98	4097.9	3598.67	3084.14	4605.83	4184.34	3499.67	1299.53	4282.12	3817.26	2867.1	3098.93	4148.64	5763.07	2929.61		3.8	1	FALSE	0.0001042	3.616e-06
High	Unambiguous	[K].eHNGQVTGIDWAPESNR.[I]	N-Term(TMTpro)	1	O15143	O15143	0	3	0.6558	0	1	1	738.7	2214.09	2214.09	0.24	0.00018	CID (Collision Induced Dissociation)	MS2	58.3522	18.4	8.956	62.3692	12498	201015L_YASAM07425_YAII63-13.raw	F4.9	4516.32	3444.28	4665.53	6308.17	4199.49	5333.54	6412.38	5492.13	1723.04	3490.83	4086	5122.56	5171.27	5263.41	5231.11	2927.84		4.59	1	FALSE	0.0001042	4.227e-05
High	Unambiguous	[K].vLTDEQYQAVR.[A]	N-Term(TMTpro)	1	Q9ULZ3	Q9ULZ3	0	2	0.2756	0	1	1	813.445	1625.88	1625.88	0.95	0.00077	CID (Collision Induced Dissociation)	MS2	20.7505	36.9	14.504	62.346	12489	201015L_YASAM07425_YAII63-13.raw	F4.9	8670.28	9225.92	9322.48	9549.23	8262.43	8477.66	8488.87	9284.56	4855.98	9854.5	11924.3	9998.77	9875.7	10745.6	8510.44	7442.94		3.12	1	FALSE	0.0001042	0.0002851
High	Unambiguous	[K].dVQDSLTVSNEAQTAk.[E]	N-Term(TMTpro); K16(TMTpro)	1	P52907	P52907	0	2	0.5483	0	1	1	1157.62	2314.24	2314.24	-0.57	-0.00066	CID (Collision Induced Dissociation)	MS2	0	6.3	119.5	62.3409	12487	201015L_YASAM07425_YAII63-13.raw	F4.9	2134.97	873.053	1971.71	1878.28		3460.22	1813.27	1287.49		592.259	1766.39	2702.49	1882.84	2151.99	2139.29	592.367		6.73	1	FALSE	0.0001042	2.058e-08
High	Unambiguous	[K].lYGSAGPPPTGEEDTAEk.[D]	N-Term(TMTpro); K18(TMTpro)	1	P11021	P11021	0	2	0.6761	0	1	1	1214.13	2427.25	2427.25	-0.12	-0.00014	CID (Collision Induced Dissociation)	MS2	0	2.6	119.5	62.2802	12462	201015L_YASAM07425_YAII63-13.raw	F4.9		610.892	825.715	1007.13		776.846	533.126	654.855		571.088	846.799	811.228	764.266	1141.83	1287.92	684.773		5.99	1	FALSE	0.0001042	1.24e-08
High	Unambiguous	[K].sENGLEFTSSGSANTETTk.[V]	N-Term(TMTpro); K19(TMTpro)	1	P21796	P21796	0	2	0.7557	0	1	1	1284.65	2568.29	2568.29	0.37	0.00047	CID (Collision Induced Dissociation)	MS2	0	3.2	119.5	62.2536	12451	201015L_YASAM07425_YAII63-13.raw	F4.9	856.329	1031.59	1263.17	912.497	1064.03	1472.42		1389.99		618.903		1141.98	717.268	1477.45	1227.9			6.14	1	FALSE	0.0001042	4.228e-09
High	Unambiguous	[K].gQLcELScSTDYR.[M]	N-Term(TMTpro); C4(Carbamidomethyl); C8(Carbamidomethyl)	1	Q99873	Q99873	0	2	0.6948	0	1	1	946.943	1892.88	1892.88	-0.45	-0.00042	CID (Collision Induced Dissociation)	MS2	0	15.7	38.635	62.2278	12440	201015L_YASAM07425_YAII63-13.raw	F4.9	6257.94	4162.7	3857.3	4724.97	2833.15	4358.71	5317.95	3448.5	2108.6	4088.67	3569.54	5078.63	3844.52	3092.15	3760.14	2478.27		4.03	1	FALSE	0.0001042	1.834e-05
High	Unambiguous	[R].aLEQQVEEmk.[T]	N-Term(TMTpro); M9(Oxidation); K10(TMTpro)	1	P35579	P35579	0	3	0.3474	0	1	1	610.338	1829	1829	1.75	0.00107	CID (Collision Induced Dissociation)	MS2	29.4716	11.4	10.758	62.2059	12430	201015L_YASAM07425_YAII63-13.raw	F4.9	5690.52	4246.58	7386.99	8107.51	5366.73	7959.78	10012.4	6650.81	4281.25	5928.64	7880.65	10045.8	7432.14	6405.18	3908.25	5988.12		3.31	1	FALSE	0.0001042	0.0002024
High	Unambiguous	[R].aLEQQVEEmk.[T]	N-Term(TMTpro); M9(Oxidation); K10(TMTpro)	1	P35579	P35579	0	2	0.3392	0	1	1	915.003	1829	1829	0.39	0.00035	CID (Collision Induced Dissociation)	MS2	11.2474	33.5	34.599	62.1434	12400	201015L_YASAM07425_YAII63-13.raw	F4.9	8128.49	5931.2	10527.8	7644.64	6770.4	10872.9	12028	10166.3	2983.81	6452.64	7071.52	10106.8	9127.78	14663.2	4803.28	5129.54		3.98	1	FALSE	0.0001042	0.0003066
High	Unambiguous	[K].nIDDGTSDRPYSHALVAGIDR.[Y]	N-Term(TMTpro)	1	P61353	P61353	0	4	0.4729	0	1	1	644.831	2576.3	2576.3	-0.86	-0.00055	CID (Collision Induced Dissociation)	MS2	13.5049	5.4	3.78	62.1007	12383	201015L_YASAM07425_YAII63-13.raw	F4.9	10866	5801.55	10156.9	8719.15	8445.43	15899	7042.12	7098.52		5762.35	9760.25	8473.74	7510.81	11278.4	4056.54	5410.9		4.25	1	FALSE	0.0001042	0.0001373
High	Unambiguous	[K].nIDDGTSDRPYSHALVAGIDR.[Y]	N-Term(TMTpro)	1	P61353	P61353	0	3	0.4182	0	1	1	859.438	2576.3	2576.3	-1.66	-0.00143	CID (Collision Induced Dissociation)	MS2	31.6916	28.6	23.58	62.0731	12369	201015L_YASAM07425_YAII63-13.raw	F4.9	7563.03	5777.06	7541.89	8059.02	6229.94	8128.33	7793.63	6389.66	2208.12	7173.16	9396.05	10209.7	7116.2	9401.42	5348.1	5200.03		3.85	1	FALSE	0.0001042	0.0001622
High	Unambiguous	[K].eSEAVEWQQk.[A]	N-Term(TMTpro); K10(TMTpro)	1	P26038	P26038	0	3	0.3303	0	1	1	614.667	1841.99	1841.99	-0.85	-0.00052	CID (Collision Induced Dissociation)	MS2	7.49787	11.9	6.318	62.0506	12360	201015L_YASAM07425_YAII63-13.raw	F4.9	15076.4	12442.4	14974.2	16735	15063	22549.7	21691.8	17818.6	4465.66	11547.2	16772.3	20900.5	11278.1	13090.9	11673.4	8518.36		3.33	1	FALSE	0.0001042	4.121e-06
High	Unambiguous	[K].sNLNSLDEQEGVk.[S]	N-Term(TMTpro); K13(TMTpro)	1	O75223	O75223	0	2	0.4336	0	1	1	1021.06	2041.1	2041.11	-0.88	-0.00089	CID (Collision Induced Dissociation)	MS2	0	12.3	119.5	62.0343	12354	201015L_YASAM07425_YAII63-13.raw	F4.9	3133.24	2453.13	3336.5	3524.58	2800.77	3850.02	4911.75	2877.77	891.684	2668.28	3511.5	4798.09	2898.03	3978.95	2672.49	1151.51		4.59	1	FALSE	0.0001042	1.165e-05
High	Unambiguous	[K].mHDLNTDQENLVGTHDAPIR.[C]	N-Term(TMTpro)	1	O43684	O43684	0	3	0.5362	0	1	1	860.763	2580.28	2580.28	-1.77	-0.00152	CID (Collision Induced Dissociation)	MS2	38.3326	25.1	32.755	62.0277	12350	201015L_YASAM07425_YAII63-13.raw	F4.9	6602.98	6227.61	7268.38	5573.74	6083.09	7494.39	9029.69	6628.82	2701.81	5347.07	6987.15	7437.17	6978.21	8266.44	6151.64	5195.88		4.42	1	FALSE	0.0001042	0.0001054
High	Unambiguous	[K].eHNGQVTGIDWAPESNR.[I]	N-Term(TMTpro)	1	O15143	O15143	0	2	0.6918	0	1	1	1107.55	2214.09	2214.09	0.6	0.00067	CID (Collision Induced Dissociation)	MS2	21.2748	9.1	114.167	62.0018	12339	201015L_YASAM07425_YAII63-13.raw	F4.9	1941.36	2310.13	3115.27	2475.24	1742.88	2127.05	3289.66	2123.61	980.177	2393.27	2334.42	2711.77	2558.78	3239.02	1740.4	1277.47		4.77	1	FALSE	0.0001042	2.541e-06
High	Unambiguous	[R].ecPSDEcGAGVFmASHFDR.[H]	N-Term(TMTpro); C2(Carbamidomethyl); C7(Carbamidomethyl); M13(Oxidation)	1	P62979	P62979	0	3	0.8421	0	1	1	831.358	2492.06	2492.06	-0.11	-9e-05	CID (Collision Induced Dissociation)	MS2	17.3514	16.9	6.458	62.4341	12525	201015L_YASAM07425_YAII63-13.raw	F4.9	8732.55	7790.17	8081.7	8251.36	6743.2	9873.6	8503.33	8424.1	3441.51	7003.43	8071.2	9969.5	7213.47	8038.41	9427.92	7329.03		4.75	1	FALSE	0.0001042	5.642e-09
High	Unambiguous	[R].aLEQQVEEmk.[T]	N-Term(TMTpro); M9(Oxidation); K10(TMTpro)	1	P35579	P35579	0	2	0.3701	0	1	1	915.003	1829	1829	0.45	0.00042	CID (Collision Induced Dissociation)	MS2	41.2605	33.6	29.617	61.9579	12320	201015L_YASAM07425_YAII63-13.raw	F4.9	8067.36	5547.47	10414.6	9022.54	6512.07	12732.6	10413.7	8554.86	2901.72	6301.37	9859.99	13116.1	9397.01	11071.4	6223.17	5361.87		4.08	1	FALSE	0.0001042	7.913e-05
High	Unambiguous	[K].gTVEGFEPADNk.[C]	N-Term(TMTpro); K12(TMTpro)	1	P37108	P37108	0	2	0.5113	0	1	1	936.503	1872	1872	-0.93	-0.00087	CID (Collision Induced Dissociation)	MS2	4.52916	60.3	24.648	62.4618	12538	201015L_YASAM07425_YAII63-13.raw	F4.9	14048	11484.3	16827.9	16950.3	12325.4	18251.7	21886.6	16022.1	3451.8	11465.9	15592.4	22989.1	15335.1	17961.3	15956.1	9871.6		4.42	1	FALSE	0.0001042	2.487e-05
High	Unambiguous	[K].dVQDSLTVSNEAQTAk.[E]	N-Term(TMTpro); K16(TMTpro)	1	P52907	P52907	0	3	0.5539	0	1	1	772.084	2314.24	2314.24	-0.34	-0.00026	CID (Collision Induced Dissociation)	MS2	9.02545	11.3	10.889	62.4674	12541	201015L_YASAM07425_YAII63-13.raw	F4.9	12363.3	10979.5	14035.5	11265.1	13819.2	16636.6	19980.8	16351.1	4011.13	10994.3	14526.8	12006.5	14666.6	17854.5	10768.3	9164.74		4.73	1	FALSE	0.0001042	0.0001821
High	Unambiguous	[K].lTVAENEAETk.[L]	N-Term(TMTpro); K11(TMTpro)	1	P07814	P07814	0	2	0.4894	0	1	1	907.013	1813.02	1813.02	-0.76	-0.00069	CID (Collision Induced Dissociation)	MS2	33.801	41.8	29.777	62.8586	12715	201015L_YASAM07425_YAII63-13.raw	F4.9	10363.8	10055.9	13295.4	9037.63	9434.52	12929.6	14536.8	11248	3333.9	8775.48	10976.7	12298.5	11786.6	14024.2	8616.08	6806.96		3.78	1	FALSE	0.0001042	0.0001039
High	Unambiguous	[R].sFAGAVSPQEEEEFRR.[L]	N-Term(TMTpro)	1	P33992	P33992	1	3	0.6616	0	1	1	715.029	2143.07	2143.07	-1.04	-0.00074	CID (Collision Induced Dissociation)	MS2	47.8379	13.5	5.726	62.7918	12687	201015L_YASAM07425_YAII63-13.raw	F4.9	16070.7	8686.74	19659.1	14455.7	13349.6	19913.8	20228.6	13455.8	6410.72	12571.1	16060.1	20998.8	16027.3	19718	10757.6	10352.7		4.64	1	FALSE	0.0001042	8.832e-06
High	Unambiguous	[K].lGAPAAGGEEEWGQQQR.[Q]	N-Term(TMTpro)	1	O94992	O94992	0	2	0.5233	0	1	1	1044.53	2088.05	2088.04	1.09	0.00113	CID (Collision Induced Dissociation)	MS2	0	8.7	47.374	62.7475	12668	201015L_YASAM07425_YAII63-13.raw	F4.9	1849.64	1257.83	2799.25	2124.88	1845.93	2876.43	2835.09	2012.39	938.312	974.453	3012.42	2022.17	2711.87	2528.42	1693.53	1650.14		4.3	1	FALSE	0.0001042	1.926e-06
High	Unambiguous	[R].nTVSQSISGDPEIDk.[K]	N-Term(TMTpro); K15(TMTpro)	1	Q9BY44	Q9BY44	0	2	0.1861	0	1	1	1099.59	2198.18	2198.18	-1.05	-0.00116	CID (Collision Induced Dissociation)	MS2	19.0757	6.1	44.865	62.6891	12644	201015L_YASAM07425_YAII63-13.raw	F4.9	1509.47	965.972	1895.14	2161.38	1157.96	2178.65	1707.52	1421.94	651.339	914.582	1483.52	2198.02	1215.84	1898.03	1466.04	1294.58		4.03	1	FALSE	0.0001042	4.979e-06
High	Unambiguous	[K].tGDVEDSTVLk.[S]	N-Term(TMTpro); K11(TMTpro)	1	Q9UNN5	Q9UNN5	0	2	0.3248	0	1	1	886.499	1771.99	1771.99	-1.71	-0.00152	CID (Collision Induced Dissociation)	MS2	0	25.2	63.098	62.6794	12640	201015L_YASAM07425_YAII63-13.raw	F4.9	5397.66	4440.76	8232.57	5456.3	4932.34	8622.4	8993.5	6476.49	1954.64	4381.69	6865.87	9464.98	8598.19	8129.09	6652.74	3270.36		3.11	1	FALSE	0.0001042	8.091e-05
High	Unambiguous	[K].gISQEQMQEFR.[A]	N-Term(TMTpro)	1	O43707	O43707	0	2	0.4083	0	1	1	828.92	1656.83	1656.83	-0.32	-0.00027	CID (Collision Induced Dissociation)	MS2	15.0006	34.4	8.544	62.6552	12628	201015L_YASAM07425_YAII63-13.raw	F4.9	14545.2	11936	16510.4	13692.5	11423.9	16265.5	16444.7	12419.5	7822	12813.2	18014.9	16278.4	13742.6	15750.5	13102.9	12195.1		3.38	1	FALSE	0.0001042	4.248e-05
High	Unambiguous	[K].gFSEEHNTWEPEk.[N]	N-Term(TMTpro); K13(TMTpro)	1	P45973	P45973	0	3	0.1711	0	1	1	733.373	2198.1	2198.1	1.15	0.00084	CID (Collision Induced Dissociation)	MS2	54.2733	16	23.472	62.6432	12623	201015L_YASAM07425_YAII63-13.raw	F4.9	5107.27	4930.92	5613.36	4746.95	5230.12	5958.77	6884.01	5768.18	2711.85	5039.96	5308.17	5944.14	5358.93	5691.85	5431.74	4749.62		3.39	1	FALSE	0.0001042	0.000242
High	Unambiguous	[K].yTVQDESHSEWVScVR.[F]	N-Term(TMTpro); C14(Carbamidomethyl)	1	P63244	P63244	0	2	0.5659	0	1	1	1143.54	2286.08	2286.08	-0.46	-0.00053	CID (Collision Induced Dissociation)	MS2	0	5.2	119.5	62.6399	12622	201015L_YASAM07425_YAII63-13.raw	F4.9	1393.5	2398.81	835.571	1296.41	1296.12	1107.99	1228.01	1540.47	604.844	1251.55	1766.16	1423.88	980.817	1771.11	1100.82	1209.35		5.46	1	FALSE	0.0001042	7.544e-06
High	Unambiguous	[K].tGIEQGSDAGYLcESQk.[F]	N-Term(TMTpro); C13(Carbamidomethyl); K17(TMTpro)	1	P40939	P40939	0	3	0.3088	0	1	1	817.748	2451.23	2451.23	-1.1	-0.00089	CID (Collision Induced Dissociation)	MS2	71.5129	39.9	19.401	62.6181	12612	201015L_YASAM07425_YAII63-13.raw	F4.9	10635.9	6169.14	15446.7	14213.2	11141.3	17985.5	19175.8	13869.4	3903.6	7189.36	13381.5	20875.1	12762.8	18203.3	9367.91	10174.9		5.02	1	FALSE	0.0001042	1.675e-06
High	Unambiguous	[K].yTVQDESHSEWVScVR.[F]	N-Term(TMTpro); C14(Carbamidomethyl)	1	P63244	P63244	0	3	0.6466	0	1	1	762.697	2286.08	2286.08	-0.42	-0.00032	CID (Collision Induced Dissociation)	MS2	33.8561	15.9	5.019	62.6046	12604	201015L_YASAM07425_YAII63-13.raw	F4.9	12737.8	10498	16829.2	12324.6	10479.3	20649.9	21372.4	11375.8	3248.09	11877.1	17485.7	22973.6	13584.8	19548.7	17299.4	11252.2		5.97	1	FALSE	0.0001042	5.154e-07
High	Unambiguous	[K].dHGGALGPEEFk.[A]	N-Term(TMTpro); K12(TMTpro)	1	O43707	O43707	0	2	0.5577	0	1	1	933.007	1865.01	1865	1.27	0.00118	CID (Collision Induced Dissociation)	MS2	0	19.6	98.87	62.5889	12598	201015L_YASAM07425_YAII63-13.raw	F4.9	5278.55	3157.2	4961.18	4032.25	3546.82	7403.79	6590.02	4472.32	553.416	3757.78	5899.76	8116.15	5450.72	5690.5	4152	2339.1		3.64	1	FALSE	0.0001042	3.591e-05
High	Unambiguous	[K].dHGGALGPEEFk.[A]	N-Term(TMTpro); K12(TMTpro)	1	O43707	O43707	0	3	0.4036	0	1	1	622.339	1865	1865	-1.22	-0.00076	CID (Collision Induced Dissociation)	MS2	6.26899	14.2	11.134	62.5358	12572	201015L_YASAM07425_YAII63-13.raw	F4.9	8431.97	6171.58	8980.76	9491.83	8235.57	12825.3	13246.4	9509.71	1904.3	7880.48	9982.94	10326.8	7063.08	13533.5	9106.04	7330.98		5.5	1	FALSE	0.0001042	5.556e-08
High	Unambiguous	[K].tEAASDPQHPAASEGAAAAAASPPLLR.[C]	N-Term(TMTpro)	1	Q99536	Q99536	0	3	0.6178	0	1	1	954.493	2861.46	2861.47	-2.34	-0.00223	CID (Collision Induced Dissociation)	MS2	0	13.8	52.46	62.5036	12559	201015L_YASAM07425_YAII63-13.raw	F4.9	3117.08	3248.92	3341.15	3153.12	3213.97	3528.3	4841.53	3642.08	1770.33	3932.8	4120.18	4243.4	3572.75	4623.15	3083.5	2105.29		6.62	1	FALSE	0.0001042	9.888e-07
High	Unambiguous	[K].iVQAEGEAEAAk.[M]	N-Term(TMTpro); K12(TMTpro)	1	Q99623	Q99623	0	2	0.3699	0	1	1	912.522	1824.04	1824.04	0.05	4e-05	CID (Collision Induced Dissociation)	MS2	13.6921	39.6	38.811	62.4965	12556	201015L_YASAM07425_YAII63-13.raw	F4.9	8990.78	7232.42	10680.2	9210.11	7911.98	14423.1	14059.6	9142.62	2955.68	8458.66	9985.91	12871.1	9672.16	15633.7	10664.2	5544.87		4.19	1	FALSE	0.0001042	2.491e-05
High	Unambiguous	[R].lTWHScPEDEAQ.[-]	N-Term(TMTpro); C6(Carbamidomethyl)	1	Q13185	Q13185	0	2	0.4953	0	1	1	888.913	1776.82	1776.82	-0.1	-9e-05	CID (Collision Induced Dissociation)	MS2	18.2049	54.6	10.354	62.4879	12551	201015L_YASAM07425_YAII63-13.raw	F4.9	13555.6	13331.2	17418.3	15856.1	14230	18818	20790.1	14742.8	4908.65	13436	15349.4	21935.3	16748	21472.8	17211.5	10257.4		3.21	1	FALSE	0.0001042	0.0002136
High	Unambiguous	[K].tESNQEVANPEHYIk.[H]	N-Term(TMTpro); K15(TMTpro)	1	P06730	P06730	0	3	0.4288	0	1	1	789.754	2367.25	2367.24	1.35	0.00106	CID (Collision Induced Dissociation)	MS2	0	23.8	10.758	62.4658	12540	201015L_YASAM07425_YAII63-13.raw	F4.9	10091.3	12219.8	13904	10948.5	10591	15167.6	20333	13883.8	3257.14	8198.87	12999.6	18290.7	14175.7	16889.5	10134.2	6864.01		5.83	1	FALSE	0.0001042	4.143e-11
High	Unambiguous	[R].dSLLQDGEFSmDLR.[T]	N-Term(TMTpro); M11(Oxidation)	1	P07737	P07737	0	2	0.4926	0	1	1	973.478	1945.95	1945.95	-0.37	-0.00036	CID (Collision Induced Dissociation)	MS2	0	18.9	119.5	69.8898	14814	201015L_YASAM07425_YAII63-13.raw	F4.9	4814.91	4600.15	4657.33	4531.37	4097.02	5271.29	5230.39	5459.75	2451.87	5254.36	4723.5	5626.18	4679.54	4353.19	3975.5	2993.47		4.04	1	FALSE	0.0001042	0.0001692
High	Unambiguous	[R].gVVDSEDLPLNISR.[E]	N-Term(TMTpro)	2	P07900; P08238	P07900; P08238	0	3	0	0	1	1	606.67	1817.99	1817.99	1.12	0.00068	CID (Collision Induced Dissociation)	MS2	0	0.6	40.003	69.9138	14821	201015L_YASAM07425_YAII63-13.raw	F4.9			775.746	857.872	814.861					777.022								3.89	2	FALSE	0.0001042	1.736e-05
High	Unambiguous	[K].wEESGPQFITNSEEVR.[L]	N-Term(TMTpro)	1	Q13257	Q13257	0	2	0.4661	0	1	1	1106.55	2212.09	2212.08	0.39	0.00043	CID (Collision Induced Dissociation)	MS2	0	8.3	119.5	69.9267	14825	201015L_YASAM07425_YAII63-13.raw	F4.9	2646.42	1969.44	2204.92	2315.57	2306.06	2302.68	2980.15	1738.6		1413.94	2231.76	2749.72	2585.99	2258.42	2077.64	1940.27		4.72	1	FALSE	0.0001042	1.301e-06
High	Unambiguous	[K].aAFDDAIAELDTLSEESYk.[D]	N-Term(TMTpro); K19(TMTpro)	1	P62258	P62258	0	3	0.6504	0	1	1	899.465	2696.38	2696.38	-0.08	-7e-05	CID (Collision Induced Dissociation)	MS2	0	10.7	90.862	87.678	18545	201015L_YASAM07425_YAII63-13.raw	F4.9	2558.11	2254.05	3505.55	2363.79	2068.79	3629.82	4511.98	2276.14	894.83	1354.3	3033.51	3440.43	2959.83	3413.51	3114.78	2072.59		4.92	1	FALSE	0.0001042	3.391e-06
High	Unambiguous	[K].dkPSGDTAAVFEEGGDVDDLLDMI.[-]	N-Term(TMTpro); K2(TMTpro)	1	P13010	P13010	0	3	0.6299	0	1	1	1039.85	3117.55	3117.54	0.86	0.00089	CID (Collision Induced Dissociation)	MS2	0	11.2	56.629	87.6448	18539	201015L_YASAM07425_YAII63-13.raw	F4.9	3193.41	3041.32	2801.4	3423.83	1973.46	3925.48	3594.64	2834.82	925.322	2386.57	1866.1	5105.94	3156.36	3132.33	3171.31	1782.04		4.35	1	FALSE	0.0001042	1.879e-05
High	Unambiguous	[K].sLADELALVDVLEDk.[L]	N-Term(TMTpro); K15(TMTpro)	1	P07195	P07195	0	2	0.4992	0	1	1	1119.64	2238.27	2238.27	-0.3	-0.00034	CID (Collision Induced Dissociation)	MS2	0	2.2	119.5	87.3805	18500	201015L_YASAM07425_YAII63-13.raw	F4.9		481.969	757.254	868.237		1291.76	788.217	715.261		654.784	930.489	1250.01		1240.31				6.17	1	FALSE	0.0001042	3.213e-07
High	Unambiguous	[K].sLADELALVDVLEDk.[L]	N-Term(TMTpro); K15(TMTpro)	1	P07195	P07195	0	3	0.3575	0	1	1	746.763	2238.27	2238.27	0.81	0.00061	CID (Collision Induced Dissociation)	MS2	0	8.3	40.252	87.2863	18484	201015L_YASAM07425_YAII63-13.raw	F4.9	1743.55	1133.73	3605.95	1703.45	1096.47	3538.62	3487.85	2435.08	759.335	1296.07	2735.43	3879.9	2488.1	3247.88	1039.61			4.56	1	FALSE	0.0001042	2.126e-05
High	Unambiguous	[K].fYPEDVSEELIQDITQR.[L]	N-Term(TMTpro)	1	P26038	P26038	0	2	0.5686	0	1	1	1193.61	2386.21	2386.21	0.52	0.00062	CID (Collision Induced Dissociation)	MS2	4.59779	0.9	119.5	87.2259	18471	201015L_YASAM07425_YAII63-13.raw	F4.9	493.826				466.155	715.869	479.152							777.453		687.654		5.54	1	FALSE	0.0001042	1.654e-06
High	Unambiguous	[K].fYPEDVSEELIQDITQR.[L]	N-Term(TMTpro)	1	P26038	P26038	0	3	0.5786	0	1	1	796.077	2386.22	2386.21	2.69	0.00214	CID (Collision Induced Dissociation)	MS2	4.52881	6.1	35.425	87.2221	18469	201015L_YASAM07425_YAII63-13.raw	F4.9	1357.29	1334.08	1813.14	1091.82	1848.07	1773.5	1745.98	1033.68	631.353	1266.49	1429.1	2243.18	1710.19	2074.67	1279.46	1825.04		6.55	1	FALSE	0.0001042	6.166e-08
High	Unambiguous	[R].iVGELEQMVSEDVPLDHR.[V]	N-Term(TMTpro)	1	Q00341	Q00341	0	3	0.6672	0	1	1	790.749	2370.23	2370.23	1.15	0.00091	CID (Collision Induced Dissociation)	MS2	0	4.2	75.62	87.8497	18574	201015L_YASAM07425_YAII63-13.raw	F4.9	991.669	1017.05	1251.4	1386.78	1457.77	816.959	1417.53	684.541		996.426	1143.98	1102.66	1135.97	1185.22	1254.22	850.172		5.92	1	FALSE	0.0001042	5.173e-09
High	Unambiguous	[K].ePELLEPIPYEFMA.[-]	N-Term(TMTpro)	1	P46778	P46778	0	2	0.3982	0	1	1	991.511	1982.01	1982.02	-0.18	-0.00018	CID (Collision Induced Dissociation)	MS2	4.49425	2.8	119.5	87.0982	18447	201015L_YASAM07425_YAII63-13.raw	F4.9	1004.5		1407.95	1090.63	730.66	967.488	718.115	1293.81				1435.26		1009	678.299	590.419		3.39	1	FALSE	0.0001042	0.0001978
High	Unambiguous	[K].tAFDEAIAELDTLNEESYk.[D]	N-Term(TMTpro); K19(TMTpro)	1	P31946	P31946	0	3	0.597	0	1	1	923.145	2767.42	2767.42	1.02	0.00094	CID (Collision Induced Dissociation)	MS2	0	29.4	31.569	86.5992	18355	201015L_YASAM07425_YAII63-13.raw	F4.9	5590.46	5142.01	8211.16	7338.81	4439.35	10544.4	12584.4	6888	1484.14	4690.65	6558.84	11873.9	8408.87	11201.3	7016.92	4459.95		4.64	1	FALSE	0.0001042	1.337e-08
High	Unambiguous	[K].dLADELALVDVIEDk.[L]	N-Term(TMTpro); K15(TMTpro)	1	P00338	P00338	0	3	0.6274	0	1	1	756.095	2266.27	2266.27	1.08	0.00082	CID (Collision Induced Dissociation)	MS2	2.25469	7.5	46.895	86.5873	18352	201015L_YASAM07425_YAII63-13.raw	F4.9	1183.07	1578.61	2556.65	1882.38	1652.93	3644.8	3533.68	1162.41		711.578	2386.15	3037.72	1523.31	4229.75	1400.89	564.588		4.16	1	FALSE	0.0001042	1.181e-05
High	Unambiguous	[K].tAFDEAIAELDTLNEESYk.[D]	N-Term(TMTpro); K19(TMTpro)	1	P31946	P31946	0	2	0.7022	0	1	1	1384.21	2767.42	2767.42	1.01	0.00139	CID (Collision Induced Dissociation)	MS2	15.6429	1.5	119.5	86.5483	18345	201015L_YASAM07425_YAII63-13.raw	F4.9	550.579			812.442		1449.66	1125.87					668.566		660.284	561.693			6.75	1	FALSE	0.0001042	1.91e-06
High	Unambiguous	[K].tAFDEAIAELDTLNEDSYk.[D]	N-Term(TMTpro); K19(TMTpro)	1	P27348	P27348	0	3	0.6389	0	1	1	918.473	2753.4	2753.4	0.71	0.00065	CID (Collision Induced Dissociation)	MS2	0	10.9	91.256	86.2919	18305	201015L_YASAM07425_YAII63-13.raw	F4.9	2013.18	2114.77	3307.7	2969.07	2357.38	2922.12	4066.58	2954.05	764.495	1649.12	3006.52	3891.82	2498.9	4062.53	2430.05	2227.3		5.04	1	FALSE	0.0001042	5.606e-07
High	Unambiguous	[R].vQDDEVGDGTTSVTVLAAELLR.[E]	N-Term(TMTpro)	1	P78371	P78371	0	2	0.5782	0	1	1	1296.69	2592.37	2592.37	0.83	0.00107	CID (Collision Induced Dissociation)	MS2	4.60823	0.6	119.5	86.0031	18259	201015L_YASAM07425_YAII63-13.raw	F4.9		528.47					462.776		547.161			1062.4						5.5	1	FALSE	0.0001042	3.649e-07
High	Unambiguous	[R].vQDDEVGDGTTSVTVLAAELLR.[E]	N-Term(TMTpro)	1	P78371	P78371	0	3	0.4683	0	1	1	864.795	2592.37	2592.37	1.06	0.00091	CID (Collision Induced Dissociation)	MS2	2.36853	6	64.566	85.9849	18255	201015L_YASAM07425_YAII63-13.raw	F4.9	1011.97	1590.74	1743.78	1386.08	2034.86	711.266	1439.93	2049.38	673.662	1037.19	944.329	2046.1	2315.07	2354.08	1704.81	1771.24		4.89	1	FALSE	0.0001042	1.306e-07
High	Unambiguous	[K].dLADELALVDVIEDk.[L]	N-Term(TMTpro); K15(TMTpro)	1	P00338	P00338	0	2	0.6173	0	1	1	1133.64	2266.27	2266.27	0.76	0.00086	CID (Collision Induced Dissociation)	MS2	2.72895	4.5	119.5	86.6688	18368	201015L_YASAM07425_YAII63-13.raw	F4.9	1040.89	588.864	1365.2	845.184	1495.83	1542.03	1942.01	928.435		838.432	592.818	2061.62	948.568	1989.57	1184.3	698.575		7.16	1	FALSE	0.0001042	9.416e-08
High	Unambiguous	[K].aAFDDAIAELDTLSEESYk.[D]	N-Term(TMTpro); K19(TMTpro)	1	P62258	P62258	0	2	0.7751	0	1	1	1348.69	2696.38	2696.38	0.58	0.00078	CID (Collision Induced Dissociation)	MS2	0	1.6	119.5	87.9347	18589	201015L_YASAM07425_YAII63-13.raw	F4.9				520.295		761.998	782.554	579.49			888.371	748.173	525.431	1606.71				7.38	1	FALSE	0.0001042	2.931e-09
High	Unambiguous	[K].sQEPLPDDDEEFELPEFVEPFLk.[D]	N-Term(TMTpro); K23(TMTpro)	1	Q6P2Q9	Q6P2Q9	0	3	0.6327	0	1	1	1119.9	3357.69	3357.69	-0.43	-0.00048	CID (Collision Induced Dissociation)	MS2	0	0.3	119.5	88.7809	18727	201015L_YASAM07425_YAII63-13.raw	F4.9								529.702								530.417		5.2	1	FALSE	0.0001042	1.572e-05
High	Unambiguous	[R].lQQELDDLLVDLDHQR.[Q]	N-Term(TMTpro)	1	P35579	P35579	0	3	0.7434	0	1	1	752.071	2254.2	2254.2	-0.15	-0.00011	CID (Collision Induced Dissociation)	MS2	20.6637	3	53.149	88.8008	18732	201015L_YASAM07425_YAII63-13.raw	F4.9	764.999	1218.08	1489.38	1011.23	591.441	956.066	555.269	1289.53		934.36	498.798		671.576	1330.82		963.394		8.34	1	FALSE	0.0001042	2.232e-12
High	Unambiguous	[K].tHVTHHPVSDHEATLR.[C]	N-Term(TMTpro)	18	P30508	Q95604; P30499; P10319; Q29963; P30501; P30490; Q29865; Q07000; P30491; P04222; Q9TNN7; P30498; P30505; P30510; P18464; P30504; P30685; P30508	0	2	0.7129	0	1	1	1071.06	2141.11	2141.12	-1.43	-0.00153	CID (Collision Induced Dissociation)	MS2	0	1.6	119.5	46.4524	5108	201015L_YASAM07425_YAII63-14.raw	F4.10			755.086	737.947	508.528		866.159	537.895		517.764	565.638	842.173		661.572		462.332		5.99	1	FALSE	0.0001042	3.953e-07
High	Unambiguous	[K].tHVTHHPVSDHEATLR.[C]	N-Term(TMTpro)	18	P30508	Q95604; P30499; P10319; Q29963; P30501; P30490; Q29865; Q07000; P30491; P04222; Q9TNN7; P30498; P30505; P30510; P18464; P30504; P30685; P30508	0	3	0.6617	0	1	1	714.377	2141.12	2141.12	0.22	0.00016	CID (Collision Induced Dissociation)	MS2	0	5.5	119.5	46.4241	5101	201015L_YASAM07425_YAII63-14.raw	F4.10	1596.01	2469.66	2105.97	2727.26	2679.56	2389.14	1413.77	1856.06		727.942	2154.79	1621.17	2129.88	1434.8	1276.51	963.126		5.41	1	FALSE	0.0001042	2.232e-09
High	Unambiguous	[K].tHVTHHPVSDHEATLR.[C]	N-Term(TMTpro)	18	P30508	Q95604; P30499; P10319; Q29963; P30501; P30490; Q29865; Q07000; P30491; P04222; Q9TNN7; P30498; P30505; P30510; P18464; P30504; P30685; P30508	0	5	0.5985	0	1	1	429.029	2141.11	2141.12	-1.37	-0.00059	CID (Collision Induced Dissociation)	MS2	0	25.8	24.192	46.1901	5043	201015L_YASAM07425_YAII63-14.raw	F4.10	6499.66	6765.34	8426.5	6574.12	6776.29	9051.41	7117.15	7046.48	3259.04	6320.73	7036.2	6058.26	7817.09	5884.36	6026.02	5818.85		4.01	1	FALSE	0.0001042	7.982e-07
High	Unambiguous	[K].qVPGGGGGGGSGGGGGSGGGGSGGGR.[G]	N-Term(TMTpro)	1	Q9UHB9	Q9UHB9	0	3	0.7183	0	1	1	716.675	2148.01	2148.01	-0.29	-0.00021	CID (Collision Induced Dissociation)	MS2	46.3211	1.4	119.5	45.9179	4983	201015L_YASAM07425_YAII63-14.raw	F4.10	654.958				890.354	876.49		928.169			668.046			595.841	697.372			5.36	1	FALSE	0.0001042	2.904e-09
High	Unambiguous	[R].sASSESSSSSSk.[K]	N-Term(TMTpro); K12(TMTpro)	1	P29084	P29084	0	2	0.5588	0	1	1	869.95	1738.89	1738.9	-1.33	-0.00115	CID (Collision Induced Dissociation)	MS2	49.0852	59.7	74.96	45.7637	4943	201015L_YASAM07425_YAII63-14.raw	F4.10	6561.77	5615.59	10282.6	11198.1	7473.46	41882	48591.2	16709.4	2618.85	24258.1	15666.1	14383.1	11396.7	9468.11	8443.72	5696.76		4.51	1	FALSE	0.0001042	1.61e-05
High	Unambiguous	[R].sASSESSSSSSk.[K]	N-Term(TMTpro); K12(TMTpro)	1	P29084	P29084	0	2	0.5661	0	1	1	869.949	1738.89	1738.9	-2.38	-0.00207	CID (Collision Induced Dissociation)	MS2	48.2515	59	119.5	45.629	4910	201015L_YASAM07425_YAII63-14.raw	F4.10	7381.29	6327.16	11202.2	10374	8708.92	39588	45246.4	16257.8	2314.13	23703.5	16642.4	16183.6	10120.6	11466.5	7622.04	5578		4.01	1	FALSE	0.0001042	7.946e-06
High	Unambiguous	[R].tASDmVSTSR.[I]	N-Term(TMTpro); M5(Oxidation)	1	O00232	O00232	0	2	0.5	0	1	1	687.846	1374.68	1374.69	-0.66	-0.00046	CID (Collision Induced Dissociation)	MS2	0	7.7	119.5	45.5372	4888	201015L_YASAM07425_YAII63-14.raw	F4.10	2248.62	1709.41	2094.22	2525.18	1375.58	2312.64	2235.61	1694.07	592.077	1248.42	1844.76	2730.07	1959.02	2412.02	2461.27	1173.99		1.72	1	FALSE	0.0001042	0.0001018
High	Unambiguous	[R].sGSmDPSGAHPSVR.[Q]	N-Term(TMTpro); M4(Oxidation)	1	Q07666	Q07666	0	3	0.6337	0	1	1	568.947	1704.83	1704.83	-0.97	-0.00055	CID (Collision Induced Dissociation)	MS2	42.3787	33.5	8.401	45.3578	4847	201015L_YASAM07425_YAII63-14.raw	F4.10	7278.96	7697.31	10016.4	8590.27	8114.34	7618.9	10332.9	8388.21	4149.21	8139.65	9005.39	9176.6	9003.03	9861.97	8167.38	6928.44		4.15	1	FALSE	0.0001042	5.03e-05
High	Unambiguous	[R].tSTSSSSVQAR.[R]	N-Term(TMTpro)	1	Q9UKV3	Q9UKV3	0	2	0.3629	0	1	1	707.877	1414.75	1414.75	0.66	0.00046	CID (Collision Induced Dissociation)	MS2	13.5734	12.2	52.695	39.9338	3603	201015L_YASAM07425_YAII63-14.raw	F4.10	2193.88	1641.86	4453.44	3459.31	3156.5	5046.16	2624.1	2375.21	1325.26	2876.89	3243.99	3068.27	2513.98	4326.77	3939.03	3054.69		2.37	1	FALSE	0.0001042	0.0003544
High	Unambiguous	[R].tGSQGQcTQVR.[V]	N-Term(TMTpro); C7(Carbamidomethyl)	1	P62857	P62857	0	2	0.4199	0	1	1	763.389	1525.77	1525.77	0.05	4e-05	CID (Collision Induced Dissociation)	MS2	4.55221	9.2	92.48	39.8654	3584	201015L_YASAM07425_YAII63-14.raw	F4.10	2244.64	1605.72	2911.22	2903.52	1691.18	2422.69	2081.59	2007.62	1396.6	2803.22	2523.89	3366.37	1864.36	2352.1	2766.43	2414.12		3.81	1	FALSE	0.0001042	2.515e-05
High	Unambiguous	[R].gSGGGSSGGSIGGR.[G]	N-Term(TMTpro)	2	P04264	P04264; 1346343	0	2	0.6296	0	1	1	698.859	1396.71	1396.71	0.37	0.00026	CID (Collision Induced Dissociation)	MS2	2.92558	7.8	88.856	39.6513	3549	201015L_YASAM07425_YAII63-14.raw	F4.10	1191.13	1587.81	2114.73	2818.31	1791.45	1429.17	1800.65	945.207	859.355	1789.7	3776.31	2501.81	2007.25	2745.2	1730.18	1869.53		5.13	1	TRUE	0.0001042	2.146e-06
High	Unambiguous	[K].aLINADELASDVAGAEALLDR.[H]	N-Term(TMTpro)	1	Q13813	Q13813	0	3	0.6101	0	1	1	811.105	2431.3	2431.3	0.56	0.00045	CID (Collision Induced Dissociation)	MS2	0	0.6	75.498	89.8829	18902	201015L_YASAM07425_YAII63-13.raw	F4.9	848.427											942.236		759.943				7.13	1	FALSE	0.0001042	1.026e-14
High	Unambiguous	[K].tAFDEAIAELDTLSEESYk.[D]	N-Term(TMTpro); K19(TMTpro)	1	P63104	P63104	0	2	0.6694	0	1	1	1370.71	2740.41	2740.41	1.79	0.00245	CID (Collision Induced Dissociation)	MS2	0	0.1	119.5	89.8286	18892	201015L_YASAM07425_YAII63-13.raw	F4.9										549.747								6.05	1	FALSE	0.0001042	2.939e-06
High	Unambiguous	[K].tAFDEAIAELDTLSEESYk.[D]	N-Term(TMTpro); K19(TMTpro)	1	P63104	P63104	0	3	0.455	0	1	1	914.141	2740.41	2740.41	1	0.00092	CID (Collision Induced Dissociation)	MS2	0	10.4	79.294	89.4537	18836	201015L_YASAM07425_YAII63-13.raw	F4.9	2230.8	1747.38	3109.29	1325.73	1364.83	4654.81	4383.21	3734.59	640.273	2090.96	2267.61	2997.62	2907.11	4810.73	2176.73	1846.12		4.11	1	FALSE	0.0001042	3.486e-07
High	Unambiguous	[R].lQQELDDLLVDLDHQR.[Q]	N-Term(TMTpro)	1	P35579	P35579	0	2	0.5543	0	1	1	1127.6	2254.2	2254.2	0.72	0.00081	CID (Collision Induced Dissociation)	MS2	1.97023		72.83	89.1769	18792	201015L_YASAM07425_YAII63-13.raw	F4.9																		3.41	1	FALSE	0.0001042	9.18e-05
High	Unambiguous	[K].tAFDDAIAELDTLNEDSYk.[D]	N-Term(TMTpro); K19(TMTpro)	1	P61981	P61981	0	3	0.6598	0	1	1	913.801	2739.39	2739.39	0.79	0.00072	CID (Collision Induced Dissociation)	MS2	0	12.9	119.5	85.5266	18176	201015L_YASAM07425_YAII63-13.raw	F4.9	2976.18	1840.2	3789.24	3292.95	2248.09	5001.13	5373.41	2474.39	986.991	2934.35	3085.14	4817.12	3131.3	3977.46	3191.45	1946.1		4.85	1	FALSE	0.0001042	1.483e-07
High	Unambiguous	[R].gPGGSQGSQGPSPQGAR.[R]	N-Term(TMTpro)	1	Q96MG7	Q96MG7	0	2	0.68	0	1	1	914.962	1828.92	1828.92	-3.37	-0.00308	CID (Collision Induced Dissociation)	MS2	25.0295	7.5	112.267	47.0227	5250	201015L_YASAM07425_YAII63-14.raw	F4.10	4779.06	2263.03	5309.78	2701.49	1975.58	2090.13	1668.35	1236.36		1422.17	910.64	1251.6	1322.09	1459.62	1050.07	894.148		5.25	1	FALSE	0.0001042	2.036e-05
High	Unambiguous	[K].dDLDVTELTNEDLLDQLVk.[Y]	N-Term(TMTpro); K19(TMTpro)	2	P42167; P42166	P42167; P42166	0	3	0.6298	0	1	1	932.84	2796.5	2796.5	1.09	0.00102	CID (Collision Induced Dissociation)	MS2	19.8958	16.9	46.349	84.5161	17986	201015L_YASAM07425_YAII63-13.raw	F4.9	4134.75	3241.49	4340	3483.33	3763.34	6561.87	7009.85	4101.51	1056.48	3239.85	3318.27	7251.53	4090.83	7093.32	3955.01	2401.11		5.16	2	FALSE	0.0001042	5.443e-06
High	Unambiguous	[K].nLDSLEEDLDFLR.[D]	N-Term(TMTpro)	1	P61758	P61758	0	2	0.5037	0	1	1	941.99	1882.97	1882.97	0.32	0.0003	CID (Collision Induced Dissociation)	MS2	2.46739	14.8	72.4	84.3757	17961	201015L_YASAM07425_YAII63-13.raw	F4.9	4410.19	2800.64	7196.94	3711.61	3653.41	4170.19	4514.93	3778.99	1175.97	3327.58	4138.47	6292.32	2827.51	4990.56	3293.91	1796.79		4.07	1	FALSE	0.0001042	3.651e-06
High	Unambiguous	[K].eDIDAAIETYNLLSER.[W]	N-Term(TMTpro)	1	P23921	P23921	0	2	0.4728	0	1	1	1078.56	2156.11	2156.1	0.49	0.00053	CID (Collision Induced Dissociation)	MS2	8.38705	5.6	119.5	81.2014	17359	201015L_YASAM07425_YAII63-13.raw	F4.9	1749.29	1423.82	1686.39	1247.21	747.466	1733.76	1406.31	1268.25	794.803	1337.05	1226.8	1252.86	1610.03	2644.88	1728.08	842.609		4.97	1	FALSE	0.0001042	6.707e-06
High	Unambiguous	[R].eGNQEVPFDVPELWYEDEk.[H]	N-Term(TMTpro); K19(TMTpro)	1	P42704	P42704	0	3	0.5977	0	1	1	977.825	2931.46	2931.45	1.7	0.00167	CID (Collision Induced Dissociation)	MS2	6.06718	15.2	63.083	81.1767	17354	201015L_YASAM07425_YAII63-13.raw	F4.9	3490.8	2751.55	4760.42	4298.69	3412.07	6405.48	5564.32	2946.05	1030.03	2204.99	3293.08	5682.96	3510	4579.81	5306.69	1867.79		5.17	1	FALSE	0.0001042	7.804e-08
High	Unambiguous	[R].vIFLEDDDVAAVVDGR.[L]	N-Term(TMTpro)	1	Q06210	Q06210	0	2	0.4775	0	1	1	1019.05	2037.09	2037.08	2.02	0.00206	CID (Collision Induced Dissociation)	MS2	48.7349	10.9	54.693	81.1471	17347	201015L_YASAM07425_YAII63-13.raw	F4.9	2593.61	2796.78	2480.41	2327.43	2454.84	3449.25	3465.41	2814.8	1242.54	1927.68	2945.21	3514.86	3390.56	3656.05	3511.78	2240.94		3.33	1	FALSE	0.0001042	0.0001868
High	Unambiguous	[K].eIVLADVIDNDSWR.[L]	N-Term(TMTpro)	1	P22234	P22234	0	2	0.6291	0	1	1	975.019	1949.03	1949.03	0.58	0.00057	CID (Collision Induced Dissociation)	MS2	6.92365	12.3	119.5	80.8634	17287	201015L_YASAM07425_YAII63-13.raw	F4.9	2861.18	2807.13	3708.18	2907.57	2992.13	3185.2	3226.8	2974.26	1411.96	3280.31	3576.89	4071.37	3854.5	3677.07	3226.8	2054.93		4.88	1	FALSE	0.0001042	6.259e-07
High	Unambiguous	[R].lVEYDIDEVVYDEDSPYQNIk.[I]	N-Term(TMTpro); K21(TMTpro)	1	P52788	P52788	0	3	0.4682	0	1	1	1052.2	3154.6	3154.6	0.67	0.00071	CID (Collision Induced Dissociation)	MS2	68.4185	4.1	73.46	80.839	17282	201015L_YASAM07425_YAII63-13.raw	F4.9	1095.02	877.336	844.838	806.886	890.145	1779.24	1581.25	1123.62	568.827	712.012	601.204	1052.6	1369.49	844.709	1790.16	1041.6		4.72	1	FALSE	0.0001042	3.829e-07
High	Unambiguous	[K].nSNILEDLETLR.[L]	N-Term(TMTpro)	1	P48444	P48444	0	2	0.4122	0	1	1	860.973	1720.94	1720.94	-0.46	-0.00039	CID (Collision Induced Dissociation)	MS2	12.2586	17.6	119.5	80.8356	17281	201015L_YASAM07425_YAII63-13.raw	F4.9	4818.18	3811.68	4828.93	4132.81	4196.61	5926.67	7798.45	3824.56	1987.66	3647.61	3857.05	5913.23	3478.51	4559.36	5350.51	3158.35		2.96	1	FALSE	0.0001042	0.0001255
High	Unambiguous	[R].yYGGAEVVDEIELLcQR.[R]	N-Term(TMTpro); C15(Carbamidomethyl)	1	P34897	P34897	0	2	0.6656	0	1	1	1159.59	2318.17	2318.17	0.66	0.00076	CID (Collision Induced Dissociation)	MS2	6.35528	3.6	119.5	81.3965	17396	201015L_YASAM07425_YAII63-13.raw	F4.9	1512.22	1127.07	1253.68	855.591	981.091	1371.8	965.924			628.802	1306.65		1301.94	1290.33	1714.38	975.714		6.04	1	FALSE	0.0001042	2.615e-06
High	Unambiguous	[R].aPGEQDGDAMPLGSAVDILATDDPNFSQEDQQDTQIYEk.[H]	N-Term(TMTpro); K39(TMTpro)	1	P25205	P25205	0	4	0.7033	0	1	1	1205.08	4817.29	4817.29	0.21	0.00025	CID (Collision Induced Dissociation)	MS2	0	2.1	119.5	80.8115	17274	201015L_YASAM07425_YAII63-13.raw	F4.9			1286.03	918.011	671.713	1228.67		523.205			932.102	1732.7	491.962	696.591				5.83	1	FALSE	0.0001042	5.704e-08
High	Unambiguous	[K].aELGIPLEEVPPEEINYLTR.[I]	N-Term(TMTpro)	1	Q13907	Q13907	0	2	0.5066	0	1	1	1293.7	2586.4	2586.4	0.52	0.00068	CID (Collision Induced Dissociation)	MS2	22.66	2.4	71.45	80.7284	17256	201015L_YASAM07425_YAII63-13.raw	F4.9	544.805		983.868	549.285	897.695			522.377		748.885	572.958	966.854	1179.58	859.498	590.985	720.118		4.58	1	FALSE	0.0001042	4.471e-06
High	Unambiguous	[K].lNNDDNVDGLLVQLPLPEHIDER.[R]	N-Term(TMTpro)	1	P13995	P13995	0	3	0.6951	0	1	1	978.184	2932.54	2932.53	0.98	0.00096	CID (Collision Induced Dissociation)	MS2	42.3759	8.1	68.712	80.2844	17172	201015L_YASAM07425_YAII63-13.raw	F4.9	2007.82	1792.34	2619	2785.62	2163.82	2473.77	2740.26	1855.91	536.344	1689.73	2538.4	2860.3	1510.27	2348.46	1958.19	676.411		6.69	1	FALSE	0.0001042	1.331e-10
High	Unambiguous	[R].aVFVDLEPTVIDEVR.[T]	N-Term(TMTpro)	3	Q71U36; Q9BQE3	Q71U36; P68363; Q9BQE3	0	3	0.6449	0	1	1	669.378	2006.12	2006.11	2.96	0.00198	CID (Collision Induced Dissociation)	MS2	0	3.2	44.928	80.2643	17168	201015L_YASAM07425_YAII63-13.raw	F4.9		1058.22	770.227	774.166	729.997	875.915	580.79	1285.31		669.507	693.39	1496.88	702.892	1649.76	768.549	1003.75		4.9	2	FALSE	0.0001042	9.35e-06
High	Unambiguous	[R].dNYVPEVSALDQEIIEVDPDTk.[E]	N-Term(TMTpro); K22(TMTpro)	1	P08708	P08708	0	3	0.6376	0	1	1	1033.21	3097.61	3097.61	0.48	0.00049	CID (Collision Induced Dissociation)	MS2	16.0703	20.7	47.26	80.0338	17125	201015L_YASAM07425_YAII63-13.raw	F4.9	4537.74	3839.22	5941.31	4682.04	3577.48	7052.25	8911.91	4828.82	1471.05	3843.37	5738.86	6029.54	4771.64	7700.02	5226.17	2928.33		4.47	1	FALSE	0.0001042	7.581e-05
High	Unambiguous	[K].vDEFPLcGHMVSDEYEQLSSEALEAAR.[I]	N-Term(TMTpro); C7(Carbamidomethyl)	1	P27635	P27635	0	3	0.7352	0	1	1	1129.53	3386.58	3386.58	-0.12	-0.00013	CID (Collision Induced Dissociation)	MS2	5.47838	2.9	114.786	79.9962	17117	201015L_YASAM07425_YAII63-13.raw	F4.9	1182.49		802.273	705.644	564.104	1476.46	710.959	659.924	756.124	616.498	1074.57	917.214	623.403	1238.53		835.719		6.57	1	FALSE	0.0001042	1.521e-06
High	Unambiguous	[R].fQPGETLTEILETPATSEQEAEHQR.[A]	N-Term(TMTpro)	1	P46940	P46940	0	3	0.568	0	1	1	1049.19	3145.57	3145.56	2.53	0.00265	CID (Collision Induced Dissociation)	MS2	28.1636	5	119.5	79.9323	17106	201015L_YASAM07425_YAII63-13.raw	F4.9	1645	1111.56	1081.5	955.205	1212.43	2162.42	1527.03	1115.78		1305.19	680.329	1479.02	1254.21	1895.95	1459.94	565.883		4.19	1	FALSE	0.0001042	3.833e-06
High	Unambiguous	[R].vIFLEDDDVAAVVDGR.[L]	N-Term(TMTpro)	1	Q06210	Q06210	0	2	0.6078	0	1	1	1019.04	2037.08	2037.08	0.05	5e-05	CID (Collision Induced Dissociation)	MS2	11.0536	11.4	73.73	80.787	17269	201015L_YASAM07425_YAII63-13.raw	F4.9	2771.26	2454.51	2808.21	3017.93	2617.64	3537.34	4037.43	3462.47	1113.15	1975.72	2783.12	3324.17	2435.05	3317.07	2784.92	1815.36		5.15	1	FALSE	0.0001042	1.686e-06
High	Unambiguous	[R].yYGGAEVVDEIELLcQR.[R]	N-Term(TMTpro); C15(Carbamidomethyl)	1	P34897	P34897	0	3	0.7234	0	1	1	773.395	2318.17	2318.17	2.05	0.00158	CID (Collision Induced Dissociation)	MS2	0	4.7	44.506	81.4708	17415	201015L_YASAM07425_YAII63-13.raw	F4.9	2162.49	1039.66	1465.25	1456.07	1983.77	1828.37	1397.31	1799.38			699.451	835.985	1131.35	1288.72	914.465	984.407		6.11	1	FALSE	0.0001042	8.824e-09
High	Unambiguous	[K].aLDQASEEIWNDFR.[E]	N-Term(TMTpro)	1	P50579	P50579	0	2	0.5438	0	1	1	999.498	1997.99	1997.99	-0.11	-0.00011	CID (Collision Induced Dissociation)	MS2	10.3995	10.5	79.426	81.5004	17422	201015L_YASAM07425_YAII63-13.raw	F4.9	3255.48	2806.35	2838.36	2222.49	1981.45	3118.54	2100.59	2496.1	633.357	2412.25	3179.86	4092.19	2492.77	4388.48	3370.07	2418.55		4.34	1	FALSE	0.0001042	3.099e-06
High	Unambiguous	[K].dFSALESQLQDTQELLQEENR.[Q]	N-Term(TMTpro)	1	P35579	P35579	0	2	0.7034	0	1	1	1399.19	2797.38	2797.38	-0.42	-0.00059	CID (Collision Induced Dissociation)	MS2	0	3.3	119.5	81.6056	17443	201015L_YASAM07425_YAII63-13.raw	F4.9	594.287	825.441	1166.4	1750.98		850.876	758.584	1535.9			921.239	1435.19	1077.81	1455.37	822.755	532.824		6.17	1	FALSE	0.0001042	2.72e-06
High	Unambiguous	[K].sDLFQDDLYPDTAGPEAALEAEEWVSGR.[D]	N-Term(TMTpro)	1	Q9BR76	Q9BR76	0	3	0.6477	0	1	1	1129.21	3385.61	3385.6	1.23	0.00138	CID (Collision Induced Dissociation)	MS2	0	0.9	119.5	84.3043	17948	201015L_YASAM07425_YAII63-13.raw	F4.9				475.877			680.901	619.883				596.033		663.506	811.373			5.45	1	FALSE	0.0001042	5.245e-06
High	Unambiguous	[R].lLTETEDWLYEEGEDQAk.[Q]	N-Term(TMTpro); K18(TMTpro)	1	Q92598	Q92598	0	2	0.6597	0	1	1	1389.21	2777.4	2777.4	0.66	0.00092	CID (Collision Induced Dissociation)	MS2	0	2.9	119.5	84.1608	17925	201015L_YASAM07425_YAII63-13.raw	F4.9	454.152	668.418	860.647	474.418	666.152	865.148	964.886	594.408		740.819		1663.34	616.996	877.029	1350.32	809.651		5.76	1	FALSE	0.0001042	3.413e-05
High	Unambiguous	[K].sMEAEMIQLQEELAAAER.[A]	N-Term(TMTpro)	1	P35579	P35579	0	2	0.6582	0	1	1	1177.09	2353.17	2353.17	0.36	0.00042	CID (Collision Induced Dissociation)	MS2	4.32127	1.2	119.5	83.9658	17893	201015L_YASAM07425_YAII63-13.raw	F4.9		593.876	864.319		901.178	545.196			537.59		876.994		705.172					7.52	1	FALSE	0.0001042	4.18e-08
High	Unambiguous	[R].sEYDSLLPDVYEWPESASSPPVITE.[-]	N-Term(TMTpro)	1	P23368	P23368	0	3	0.712	0	1	1	1038.84	3114.51	3114.5	2	0.00207	CID (Collision Induced Dissociation)	MS2	4.67931	2.9	119.5	83.9212	17885	201015L_YASAM07425_YAII63-13.raw	F4.9	500.12	701.947	1516.24	1144.57	806.127	1333.38	892.3	640.302		848.711		1237.52	599.738	738.866	972.442			4.93	1	FALSE	0.0001042	5.606e-05
High	Unambiguous	[K].sMEAEMIQLQEELAAAER.[A]	N-Term(TMTpro)	1	P35579	P35579	0	3	0.6985	0	1	1	785.063	2353.17	2353.17	1.47	0.00115	CID (Collision Induced Dissociation)	MS2	0	2.8	62.23	83.903	17881	201015L_YASAM07425_YAII63-13.raw	F4.9		455.29	685.868	947.069	563.852	1258.79	1105.48			705.247	1340.24	897.106	772.443	1184.51		760.993		4.08	1	FALSE	0.0001042	1.232e-08
High	Unambiguous	[K].gTEDFIVESLDASFR.[Y]	N-Term(TMTpro)	1	P43307	P43307	0	2	0.6557	0	1	1	995.509	1990.01	1990.01	0.91	0.00091	CID (Collision Induced Dissociation)	MS2	48.815	10.6	73.91	83.0477	17739	201015L_YASAM07425_YAII63-13.raw	F4.9	2674.9	2789.28	2391.48	2001.42	3224.44	4165.68	3634.47	2044.35	1519.08	2124.09	2588.06	2967.54	3115.85	3053.03	2527.04	1580.76		4.88	1	FALSE	0.0001042	5e-07
High	Unambiguous	[R].eIFDIAFPDEQAEALAVER.[-]	N-Term(TMTpro)	1	P36776	P36776	0	3	0.6216	0	1	1	823.095	2467.27	2467.27	1.2	0.00099	CID (Collision Induced Dissociation)	MS2	0	5.8	53.911	82.8788	17706	201015L_YASAM07425_YAII63-13.raw	F4.9	1256.46	1087.25	1343	1683.19	1424.68	1989.18	1397.23	796.549	829.712	1290.15	2422.68	1502.9	1635.71	1408.34	1338.8	1223.21		4.73	1	FALSE	0.0001042	7.615e-07
High	Unambiguous	[R].eIFDIAFPDEQAEALAVER.[-]	N-Term(TMTpro)	1	P36776	P36776	0	2	0.5581	0	1	1	1234.14	2467.27	2467.27	-0.38	-0.00047	CID (Collision Induced Dissociation)	MS2	64.1817	2.5	119.5	82.8385	17696	201015L_YASAM07425_YAII63-13.raw	F4.9	548.334	904.156		929.438	670.315	1015.52	712.367	849.076	539.154	683.363	925.805	762.981	603.839	743.743				5.34	1	FALSE	0.0001042	1.19e-05
High	Unambiguous	[K].dkPSGDTAAVFEEGGDVDDLLDmI.[-]	N-Term(TMTpro); K2(TMTpro); M23(Oxidation)	1	P13010	P13010	0	3	0.6881	0	1	1	1045.18	3133.54	3133.54	0.76	0.0008	CID (Collision Induced Dissociation)	MS2	2.75357	11.7	82.687	82.4154	17617	201015L_YASAM07425_YAII63-13.raw	F4.9	2135.41	2271	3808.91	3066.11	2101.29	4856.61	4210.36	2965.22	1486.06	2027.21	3045.24	4043.81	2780.57	3328.69	3368.35	1828.08		4.97	1	FALSE	0.0001042	5.61e-06
High	Unambiguous	[K].sSAQLLEDWGmEDIDHVFSEEDYR.[T]	N-Term(TMTpro); M11(Oxidation)	1	Q14839	Q14839	0	3	0.714	0	1	1	1064.49	3191.45	3191.44	0.77	0.00081	CID (Collision Induced Dissociation)	MS2	12.9729	3.4	73.34	82.2267	17575	201015L_YASAM07425_YAII63-13.raw	F4.9	1070.68	973.022	645.957	602.052	991.118	1375.34	1366.15	1310.36		1262.09	763.683	1261.68	711.445	984.155	660.404			5.35	1	FALSE	0.0001042	9.906e-06
High	Unambiguous	[K].gHYTEGAELVDSVLDVVR.[K]	N-Term(TMTpro)	5	P07437; P68371	Q13885; Q13509; P07437; P68371; Q9BVA1	0	2	0.5782	0	1	1	1132.1	2263.19	2263.19	0.03	4e-05	CID (Collision Induced Dissociation)	MS2	7.15319	4	119.5	82.1967	17568	201015L_YASAM07425_YAII63-13.raw	F4.9	1130.09	903.59	783.593	857.434	1466.44	918.141	756.988	776.703		1474.36	853.96	782.369	1283.39	1945.14	757.873	1531.82		5.31	2	FALSE	0.0001042	7.659e-09
High	Unambiguous	[R].eDAQVAAEILEIADTPSGDk.[T]	N-Term(TMTpro); K20(TMTpro)	1	P08133	P08133	0	3	0.5633	0	1	1	894.144	2680.42	2680.42	-0.3	-0.00027	CID (Collision Induced Dissociation)	MS2	21.543	11.1	93.397	82.1537	17559	201015L_YASAM07425_YAII63-13.raw	F4.9	2584.77	1524.14	3171.07	3327.45	2347.71	4936.25	4691.84	3311.29	689.897	1770.97	3111.85	4656.01	3109.63	4620.95	1731.27			5.29	1	FALSE	0.0001042	3.692e-07
High	Unambiguous	[K].gHYTEGAELVDSVLDVVR.[K]	N-Term(TMTpro)	5	P07437; P68371	Q13885; Q13509; P07437; P68371; Q9BVA1	0	3	0.6451	0	1	1	755.069	2263.19	2263.19	0.94	0.00071	CID (Collision Induced Dissociation)	MS2	53.6961	5.4	72.358	82.0631	17538	201015L_YASAM07425_YAII63-13.raw	F4.9	1226.04	1209.3	1462.11	1085.59	1443.28	2073.58	1458.67	889.605	1045.2	1842.15	1381.5	1554.68	931.122	1874.63	944.069	1863.58		4.17	2	FALSE	0.0001042	5.936e-09
High	Unambiguous	[R].iFYPEIEEVQALDDTER.[G]	N-Term(TMTpro)	1	P33316	P33316	0	3	0.7586	0	1	1	791.072	2371.2	2371.2	0.59	0.00046	CID (Collision Induced Dissociation)	MS2	0	5.3	49.353	81.7903	17486	201015L_YASAM07425_YAII63-13.raw	F4.9	2049.84	1238.27	1504.14	1687.82	938.738	1756.6	1199.95	1660.16		1611.01	1387.29	2174.6	1330.39	1375.25	1455.47	1312.46		5.26	1	FALSE	0.0001042	4.47e-08
High	Unambiguous	[R].iFYPEIEEVQALDDTER.[G]	N-Term(TMTpro)	1	P33316	P33316	0	2	0.6102	0	1	1	1186.1	2371.2	2371.2	-0.13	-0.00015	CID (Collision Induced Dissociation)	MS2	6.34941	2	119.5	81.7205	17473	201015L_YASAM07425_YAII63-13.raw	F4.9	742.71		1041.42		600.092	1120.29	501.693	1190.46		752.285		878.375		893.848				5.31	1	FALSE	0.0001042	5.857e-06
High	Unambiguous	[R].lLTETEDWLYEEGEDQAk.[Q]	N-Term(TMTpro); K18(TMTpro)	1	Q92598	Q92598	0	3	0.5688	0	1	1	926.473	2777.4	2777.4	1.16	0.00107	CID (Collision Induced Dissociation)	MS2	2.35423	17.7	49.271	84.4453	17974	201015L_YASAM07425_YAII63-13.raw	F4.9	4717.6	2855.18	4994.93	4755.27	2929.08	6863.41	5293.82	4223.75	1059.83	3388.51	6252.73	5658.39	4352.44	6264.6	4696.06	2871.73		4.94	1	FALSE	0.0001042	8.903e-07
High	Unambiguous	[K].yHTVNGHNcEVR.[K]	N-Term(TMTpro); C9(Carbamidomethyl)	1	P09651	P09651	0	2	0.5515	0	1	1	895.439	1789.87	1789.87	-0.59	-0.00053	CID (Collision Induced Dissociation)	MS2	27.2668	9.4	119.5	47.4822	5373	201015L_YASAM07425_YAII63-14.raw	F4.10	1531.64	772.259		769.824	821.276	1558.48	1308.5	1295.79		1342.66	4222.34	6455.69	4469	4425.47	5056.61	4460.64		3.3	1	FALSE	0.0001042	5.69e-05
High	Unambiguous	[R].nSPGSQVASNPR.[Q]	N-Term(TMTpro)	1	Q9H0D6	Q9H0D6	0	2	0.526	0	1	1	759.402	1517.8	1517.8	-1.94	-0.00147	CID (Collision Induced Dissociation)	MS2	0	11.2	70.509	48.5996	5679	201015L_YASAM07425_YAII63-14.raw	F4.10	6298.12	2535.93	3227.63	2717.36	2917.39	3042.22	2542.16	1966.14	1359.89	2313.33	2525.2	2657.58	2703.24	3952.79	2551.08	2532.54		3.46	1	FALSE	0.0001042	5.444e-05
High	Unambiguous	[K].nAPQNSTQAHSENk.[C]	N-Term(TMTpro); K14(TMTpro)	1	Q9H9L3	Q9H9L3	0	3	0.6659	0	1	1	712.041	2134.11	2134.11	-1.89	-0.00135	CID (Collision Induced Dissociation)	MS2	34.4109	18.8	76.05	48.6467	5694	201015L_YASAM07425_YAII63-14.raw	F4.10	7136.43	4791.53	7917.88	6578.1	4505.01	9026.85	9034.02	7742.5	1104.78	6665.75	2696.63	2165.91	2189.53	2311.14	2427.84	1816.48		4.19	1	FALSE	0.0001042	1.449e-06
High	Unambiguous	[K].sNVSDAVAQSTR.[I]	N-Term(TMTpro)	1	P60174	P60174	0	2	0.3426	0	1	1	769.906	1538.81	1538.81	-2.37	-0.00183	CID (Collision Induced Dissociation)	MS2	0	10.7	40.112	55.2219	8309	201015L_YASAM07425_YAII63-14.raw	F4.10	9167.53	7942.03	7100.53	9197.24	7194.4	11402.5	11601.3	6862.77	6147.47	10562.9	9954.32	10362.6	7708.69	8060.85	9027.07	7294		2.89	1	FALSE	0.0001042	0.000299
High	Unambiguous	[R].hYAHTDcPGHADYVk.[N]	N-Term(TMTpro); C7(Carbamidomethyl); K15(TMTpro)	1	P49411	P49411	0	2	0.6603	0	1	1	1190.09	2379.18	2379.18	-1.67	-0.00199	CID (Collision Induced Dissociation)	MS2	0	0.7	119.5	54.7548	8081	201015L_YASAM07425_YAII63-14.raw	F4.10	620.243					868.487	1105.3											5.24	1	FALSE	0.0001042	1.032e-05
High	Unambiguous	[R].aPSHSESALNNDSk.[T]	N-Term(TMTpro); K14(TMTpro)	1	Q9NZB2	Q9NZB2	0	3	0.4523	0	1	1	689.031	2065.08	2065.08	-1.19	-0.00082	CID (Collision Induced Dissociation)	MS2	11.1236	17.2	10.635	54.7532	8079	201015L_YASAM07425_YAII63-14.raw	F4.10	13194.2	11401.3	19384.6	17941.9	16186.3	20313.4	20489.3	13302	3379.16	10865.1	15104.4	19162.7	15700.6	19291.5	17440.1	9552.7		4.82	1	FALSE	0.0001042	2.488e-05
High	Unambiguous	[K].tIQNSSVSPTSSSSSSSSTGETQTQSSSR.[L]	N-Term(TMTpro)	1	Q7Z417	Q7Z417	0	3	0.7738	0	1	1	1066.17	3196.5	3196.5	-0.04	-5e-05	CID (Collision Induced Dissociation)	MS2	28.3551	1.3	119.5	54.7279	8070	201015L_YASAM07425_YAII63-14.raw	F4.10			569.253				641.846	1053.54		887.392	522.181			774.157		683.127		8.62	1	FALSE	0.0001042	6.343e-07
High	Unambiguous	[K].hLNDETTSk.[Q]	N-Term(TMTpro); K9(TMTpro)	1	Q9NUQ9	Q9NUQ9	0	3	0.412	0	1	1	551.642	1652.91	1652.91	0.53	0.00029	CID (Collision Induced Dissociation)	MS2	20.5401	19	2.381	54.3008	7878	201015L_YASAM07425_YAII63-14.raw	F4.10	24735	24164.4	35226.2	36016.1	24558.4	46984.9	46050.5	43352.2	15386.7	25828.9	46402.8	52633	38754.2	45527.7	50754.8	26154.9		3.01	1	FALSE	0.0001042	0.0002028
High	Unambiguous	[R].lEAVSHTSDmHR.[G]	N-Term(TMTpro); M10(Oxidation)	1	Q01518	Q01518	0	2	0.6458	0	1	1	851.929	1702.85	1702.85	0.34	0.00029	CID (Collision Induced Dissociation)	MS2	0	32	119.5	54.2574	7859	201015L_YASAM07425_YAII63-14.raw	F4.10	5988.42	5056.34	6717.03	7356.8	4831.4	8647.01	9888.79	7158.32	2406.46	4049.78	8917.58	17324.8	13682.1	10911.5	10133.6	6267.63		3.19	1	FALSE	0.0001042	0.0001468
High	Unambiguous	[K].tATPQQAQEVHEk.[L]	N-Term(TMTpro); K13(TMTpro)	1	P60174	P60174	0	2	0.5323	0	1	1	1038.07	2075.13	2075.14	-1.86	-0.00192	CID (Collision Induced Dissociation)	MS2	0	13.9	99.192	55.3718	8379	201015L_YASAM07425_YAII63-14.raw	F4.10	2493.86	2214.22	3779.48	4097.7	2407.99	5581.62	4618.2	3638.73	535.85	2279.15	3135.65	4457.17	4216.48	4862.5	4654.7	2739.18		4.49	1	FALSE	0.0001042	4.622e-05
High	Unambiguous	[K].sDGTETSTNLHQk.[L]	N-Term(TMTpro); K13(TMTpro)	1	P48147	P48147	0	2	0.5125	0	1	1	1013.54	2026.07	2026.07	0.64	0.00065	CID (Collision Induced Dissociation)	MS2	0	8	79.791	53.8993	7691	201015L_YASAM07425_YAII63-14.raw	F4.10	3061.47	1628.06	2788.31	3046.44	2244.62	3002.12	2282.92	1665.58		1187.82	1920.65	2674.28	1370.12	2284.7	1339.35	1424.42		4.8	1	FALSE	0.0001042	4.091e-06
High	Unambiguous	[K].sDGTETSTNLHQk.[L]	N-Term(TMTpro); K13(TMTpro)	1	P48147	P48147	0	3	0.5316	0	1	1	676.028	2026.07	2026.07	-0.36	-0.00024	CID (Collision Induced Dissociation)	MS2	0	18.1	4.46	53.8652	7673	201015L_YASAM07425_YAII63-14.raw	F4.10	25930.5	28200.6	34077	30238.8	19911.7	43380.8	37107	32814.2	3919.64	23279.2	24924.5	40264.7	34403.7	38432.7	35473.1	16689		4.74	1	FALSE	0.0001042	7.205e-08
High	Unambiguous	[R].gAGAGHPGAGGAQPPDSPAGVR.[T]	N-Term(TMTpro)	1	Q13884	Q13884	0	3	0.6462	0	1	1	730.044	2188.12	2188.12	-0.51	-0.00037	CID (Collision Induced Dissociation)	MS2	45.5936	16.7	11.539	53.8494	7667	201015L_YASAM07425_YAII63-14.raw	F4.10	11197.1	9414.47	14601.6	12788.5	9960.7	13787.1	14110.2	10126.2	4419.47	8843.33	12088.5	11787.7	13693.3	12396.8	11237	9335.58		5.37	1	FALSE	0.0001042	3.463e-08
High	Unambiguous	[K].tVLASDTHQR.[I]	N-Term(TMTpro)	1	Q9H7D7	Q9H7D7	0	3	0.5198	0	1	1	477.933	1431.78	1431.79	-2.62	-0.00125	CID (Collision Induced Dissociation)	MS2	59.6895	55.6	6.105	53.5371	7526	201015L_YASAM07425_YAII63-14.raw	F4.10	42313	38252.9	53376.8	45828.1	40184.8	65969.5	60204.7	39847.8	15384.7	41195.2	51626.7	61098.2	52218.1	58747.1	55037.8	35517.2		4.54	1	FALSE	0.0001042	0.0002768
High	Unambiguous	[K].tHVTHHPISDHEVTLR.[C]	N-Term(TMTpro)	1	P30481	P30481	0	2	0.7285	0	1	1	1092.09	2183.17	2183.16	1.25	0.00137	CID (Collision Induced Dissociation)	MS2	0	1.2	119.5	53.476	7499	201015L_YASAM07425_YAII63-14.raw	F4.10		926.162					613.95	1088.42				825.044	729.795			710.762		5.23	1	FALSE	0.0001042	1.237e-05
High	Unambiguous	[K].eGTGSTATSSSSTAGAAGk.[G]	N-Term(TMTpro); K19(TMTpro)	1	O15372	O15372	0	3	0.5232	0	1	1	746.057	2236.16	2236.15	0.48	0.00036	CID (Collision Induced Dissociation)	MS2	41.1481	13.9	5.252	53.4109	7466	201015L_YASAM07425_YAII63-14.raw	F4.10	9193.54	5048.86	6120.65	8031.1	5773.11	10994	9720.42	6290.93	3426.67	5159.66	9348.99	8871.69	7143.68	12360.2	8596.08	4021.49		4.09	1	FALSE	0.0001042	2.752e-05
High	Unambiguous	[R].aVESSQQNGAk.[E]	N-Term(TMTpro); K11(TMTpro)	1	Q6JBY9	Q6JBY9	0	2	0.4914	0	1	1	863.983	1726.96	1726.96	0.85	0.00073	CID (Collision Induced Dissociation)	MS2	0	30.3	26.847	53.3831	7455	201015L_YASAM07425_YAII63-14.raw	F4.10	6310.7	6459.18	7374.36	6681.51	6665.85	10911.4	8697.91	7906.57	3015.11	6153.23	7350.05	9995.72	7539.02	10151	9272.53	4138.42		4.66	1	FALSE	0.0001042	1.015e-05
High	Unambiguous	[R].mEELHNQEmQk.[R]	N-Term(TMTpro); M1(Oxidation); M9(Oxidation); K11(TMTpro)	1	P23246	P23246	0	2	0.5652	0	1	1	1029.02	2057.03	2057.03	-1.36	-0.0014	CID (Collision Induced Dissociation)	MS2	18.7255	9.1	119.5	53.8694	7676	201015L_YASAM07425_YAII63-14.raw	F4.10	2298.42	2366.69	2778.18	2127.23	1922.12	2764.57	3534.78	1912.49		1893.06	2787.64	2798.89	2633.06	2833.08	2424.86	1465.6		3.22	1	FALSE	0.0001042	8.82e-05
High	Unambiguous	[R].dYDAmGSQTk.[F]	N-Term(TMTpro); M5(Oxidation); K10(TMTpro)	1	Q9Y230	Q9Y230	0	2	0.5738	0	1	1	870.442	1739.88	1739.88	-0.17	-0.00015	CID (Collision Induced Dissociation)	MS2	0	46.9	24.462	55.4032	8392	201015L_YASAM07425_YAII63-14.raw	F4.10	10905.8	6890.16	13839.8	12790.3	8978.44	16583.5	18659.4	11945.2	2888.23	8655.55	11767.8	19091.1	12626.4	20248.5	9821.73	7766.03		3.05	1	FALSE	0.0001042	0.0002588
High	Unambiguous	[K].kPENSAESNTEETk.[R]	N-Term(TMTpro); K1(TMTpro); K14(TMTpro)	1	Q96ER3	Q96ER3	0	3	0.5099	0	1	1	826.117	2476.34	2476.33	0.18	0.00015	CID (Collision Induced Dissociation)	MS2	53.2044	44.2	33.719	55.5063	8442	201015L_YASAM07425_YAII63-14.raw	F4.10	11979.4	6895.52	11500	10049.7	9560.04	16677.6	16296.2	10599.3	3741.65	9615.06	10551.6	15922	11635.6	15285.7	14395.8	6601.33		4.55	1	FALSE	0.0001042	2.001e-05
High	Unambiguous	[K].sSTAAQEVk.[T]	N-Term(TMTpro); K9(TMTpro)	1	Q9P258	Q9P258	0	2	0.3343	0	1	1	764.945	1528.88	1528.88	-0.5	-0.00038	CID (Collision Induced Dissociation)	MS2	63.7559	28.6	9.039	55.6076	8489	201015L_YASAM07425_YAII63-14.raw	F4.10	19250.7	16107.3	17476.6	19388	13674	24817.6	24643.6	16967.6	6215.02	12185.6	19785.1	25065.6	20101.5	22772.7	17285.3	11172.9		3.44	1	FALSE	0.0001042	0.0003261
High	Unambiguous	[K].sNVSDAVAQSTR.[I]	N-Term(TMTpro)	1	P60174	P60174	0	3	0.4967	0	1	1	513.608	1538.81	1538.81	0.95	0.00049	CID (Collision Induced Dissociation)	MS2	33.5201	39.1	3.348	56.5033	8932	201015L_YASAM07425_YAII63-14.raw	F4.10	39998.1	45918.1	69033.6	49595.6	48130.4	67182.6	52711.3	47778.2	21680.2	40886.9	59552.5	60674.3	54325.7	67063.8	53549.7	38053.5		4.53	1	FALSE	0.0001042	1.127e-05
High	Unambiguous	[R].lEAVSHTSDMHR.[G]	N-Term(TMTpro)	1	Q01518	Q01518	0	2	0.4848	0	1	1	843.93	1686.85	1686.86	-1.37	-0.00116	CID (Collision Induced Dissociation)	MS2	19.9486	34	27.222	56.4798	8920	201015L_YASAM07425_YAII63-14.raw	F4.10	9463.42	6523.5	11587.5	10002.6	10717.6	12707.8	10824	8868.57	3844.51	8877.55	9342.06	10238.7	9296.4	10069.4	9110.97	6957.97		3.63	1	FALSE	0.0001042	6.161e-05
High	Unambiguous	[R].lEAVSHTSDMHR.[G]	N-Term(TMTpro)	1	Q01518	Q01518	0	4	0.6894	0	1	1	422.469	1686.85	1686.86	-0.38	-0.00016	CID (Collision Induced Dissociation)	MS2	0	35.7	4.415	56.4614	8912	201015L_YASAM07425_YAII63-14.raw	F4.10	32576.6	27225.1	38435.2	37975	31097.7	38329.3	35889.2	29435.1	18930.3	34416.3	37327.9	35238.8	32804.3	34766.8	23334.3	26942.9		3.67	1	FALSE	0.0001042	8.039e-06
High	Unambiguous	[K].rDHALLEEQSk.[Q]	N-Term(TMTpro); K11(TMTpro)	1	O43707	O43707	1	2	0.3235	0	1	1	967.55	1934.09	1934.1	-0.92	-0.00089	CID (Collision Induced Dissociation)	MS2	20.375	41	41.957	56.4541	8909	201015L_YASAM07425_YAII63-14.raw	F4.10	11450.8	8879.97	11632.3	12127.1	8856.32	13849.3	15244.2	10354.8	2596.77	11718.6	13335.6	15736.8	14021.4	13882.6	16064.9	8506.67		4.08	1	FALSE	0.0001042	0.0003797
High	Unambiguous	[K].dSDLSHVQNk.[S]	N-Term(TMTpro); K10(TMTpro)	1	O60506	O60506	0	2	0.5785	0	1	1	875.982	1750.96	1750.96	-0.7	-0.00061	CID (Collision Induced Dissociation)	MS2	8.8861	81.2	18.422	56.423	8891	201015L_YASAM07425_YAII63-14.raw	F4.10	20334.4	14404.8	23639.7	22538.9	16781.6	30539.3	29721.9	23415.9	5749.23	14409.6	22909.9	26621.2	20377.1	29440.5	22636.8	14481		4.46	1	FALSE	0.0001042	6.697e-05
High	Unambiguous	[K].tGGADQSLQQGEGSk.[K]	N-Term(TMTpro); K15(TMTpro)	1	P09132	P09132	0	2	0.5131	0	1	1	1036.05	2071.09	2071.09	-0.01	-1e-05	CID (Collision Induced Dissociation)	MS2	20.7145	12	64.434	56.1865	8774	201015L_YASAM07425_YAII63-14.raw	F4.10	2645.66	2056.02	3364.63	3484.68	2329.25	5241.62	5038.25	3147.47		2187.06	3517.66	3453.27	2866.11	3856.84	3637.34	2677.34		5.36	1	FALSE	0.0001042	6.443e-07
High	Unambiguous	[K].gTDDSmTLQSQk.[F]	N-Term(TMTpro); M6(Oxidation); K12(TMTpro)	1	O00422	O00422	0	2	0.4469	0	1	1	968.003	1935	1935	-0.01	-1e-05	CID (Collision Induced Dissociation)	MS2	20.8698	30.4	17.806	56.1737	8768	201015L_YASAM07425_YAII63-14.raw	F4.10	8148.11	5361.02	9542.63	7959.02	6830.63	9882.54	10296.2	8401.03	3041.7	5939.55	9204.33	9224.47	7864.08	8564.95	9797.06	5839.51		3.58	1	FALSE	0.0001042	0.0001093
High	Unambiguous	[R].mEELHNQEVQk.[R]	N-Term(TMTpro); M1(Oxidation); K11(TMTpro)	1	Q15233	Q15233	0	3	0.3975	0	1	1	670.359	2009.06	2009.06	-0.37	-0.00025	CID (Collision Induced Dissociation)	MS2	32.5722	18.6	1.279	56.0758	8718	201015L_YASAM07425_YAII63-14.raw	F4.10	53560.6	48349	86324.4	82921	64137.7	96791.6	85228.4	72546.1	14845.9	50091.6	75646	111367	72692.8	105533	62224.2	50765.1		4	1	FALSE	0.0001042	4.984e-05
High	Unambiguous	[R].mEELHNQEVQk.[R]	N-Term(TMTpro); M1(Oxidation); K11(TMTpro)	1	Q15233	Q15233	0	2	0.3564	0	1	1	1005.03	2009.06	2009.06	-1.91	-0.00192	CID (Collision Induced Dissociation)	MS2	0	17.7	73.85	56.003	8686	201015L_YASAM07425_YAII63-14.raw	F4.10	4155.78	2707.66	5538.06	3965.86	2804.25	7310.69	6696.99	5708.3	874.564	2561.66	4282.39	6664.86	3401.73	5989.48	3567.16	3427.33		3.62	1	FALSE	0.0001042	0.0003624
High	Unambiguous	[K].sPQSDPADTPTNTk.[Q]	N-Term(TMTpro); K14(TMTpro)	1	P46013	P46013	0	2	0.4773	0	1	1	1034.05	2067.08	2067.08	-0.46	-0.00048	CID (Collision Induced Dissociation)	MS2	0	8.9	73.61	55.9118	8640	201015L_YASAM07425_YAII63-14.raw	F4.10	2343.83	2116.75	3311.9	2811.33	2080.21	3772.99	3262.31	2233.34	804.348	1826.5	1775.41	1993.03	2385.3	2172.04	2443.48	1070.53		4.19	1	FALSE	0.0001042	0.0003556
High	Unambiguous	[K].aAATPESQEPQAk.[G]	N-Term(TMTpro); K13(TMTpro)	1	P49006	P49006	0	2	0.666	0	1	1	968.534	1936.06	1936.06	-1.31	-0.00127	CID (Collision Induced Dissociation)	MS2	22.3723	31.7	75.474	55.8679	8619	201015L_YASAM07425_YAII63-14.raw	F4.10	8311.82	6757.14	8327.18	7851.91	6609.51	11715.8	9357.96	8723.93	2811.59	6595.88	9336.82	9595.52	8168.9	11518.7	9577.27	6059.46		4.88	1	FALSE	0.0001042	9.068e-06
High	Unambiguous	[K].lAEAHQQEccQk.[F]	N-Term(TMTpro); C9(Carbamidomethyl); C10(Carbamidomethyl); K12(TMTpro)	1	Q9Y5X3	Q9Y5X3	0	3	0.5283	0	1	1	704.027	2110.07	2110.07	0.2	0.00014	CID (Collision Induced Dissociation)	MS2	54.7102	28.9	17.094	55.7762	8574	201015L_YASAM07425_YAII63-14.raw	F4.10	15992.9	14165.1	17627.6	14144.7	13976.8	21058.2	19381.8	14697	3808.43	14874.6	17897.1	17634.9	16966.5	18861.3	19774.3	9802.73		4.41	1	FALSE	0.0001042	1.843e-06
High	Unambiguous	[R].sSGSPYGGGYGSGGGSGGYGSR.[R]	N-Term(TMTpro)	1	P51991	P51991	0	2	0.6677	0	1	1	1108	2215	2215	-0.77	-0.00085	CID (Collision Induced Dissociation)	MS2	0	5.6	119.5	55.6858	8527	201015L_YASAM07425_YAII63-14.raw	F4.10	2529.68	1522.85	2321.12	1688.18	1412.96	1558.46	1599.59	1139.68		741.413	1341.67	1420.15	730.813	1513.49	1320.47	1033.15		6.32	1	FALSE	0.0001042	1.275e-09
High	Unambiguous	[K].qQQQQQNDVVk.[L]	N-Term(TMTpro); K11(TMTpro)	1	Q15286	Q15286	0	2	0.3673	0	1	1	976.046	1951.09	1951.09	-0.13	-0.00012	CID (Collision Induced Dissociation)	MS2	0	22.7	74.09	55.6439	8506	201015L_YASAM07425_YAII63-14.raw	F4.10	5197.52	4400.11	4337.38	3880.46	3758.88	7277.14	6990.95	5067.58	1790.73	6428.3	10093.9	6735.7	6255.9	5441.71	8344.06	2895.43		3.24	1	FALSE	0.0001042	0.0001467
High	Unambiguous	[R].gGVDTAAAPAGGAPPAHAPGPGR.[D]	N-Term(TMTpro)	1	Q14657	Q14657	0	3	0.6396	0	1	1	752.73	2256.18	2256.18	-1.92	-0.00144	CID (Collision Induced Dissociation)	MS2	46.9195	20	8.047	55.6126	8492	201015L_YASAM07425_YAII63-14.raw	F4.10	7902.9	4988.9	6939.69	6000.07	5952.57	8621.88	8533.11	5394.15	2731.39	6332.83	6470.86	7078.32	6156.87	7217.16	7479.17	3422.21		4.8	1	FALSE	0.0001042	2.349e-08
High	Unambiguous	[K].eGTGSTATSSSSTAGAAGk.[G]	N-Term(TMTpro); K19(TMTpro)	1	O15372	O15372	0	2	0.6723	0	1	1	1118.58	2236.15	2236.15	-0.66	-0.00074	CID (Collision Induced Dissociation)	MS2	0	2.8	89.391	53.3665	7449	201015L_YASAM07425_YAII63-14.raw	F4.10	680.197	579.771	943.204	706.493		514.1	867.55	645.744	497.398	897.804		1412.86		1164.65	621.468	930.705		7.14	1	FALSE	0.0001042	5.162e-11
High	Unambiguous	[K].tHVTHHPISDHEVTLR.[C]	N-Term(TMTpro)	1	P30481	P30481	0	5	0.5811	0	1	1	437.439	2183.17	2183.16	1.6	0.0007	CID (Collision Induced Dissociation)	MS2	0	28.3	6.497	53.3198	7429	201015L_YASAM07425_YAII63-14.raw	F4.10	17441.3	14183.2	16240.7	14832.6	14881.3	15125.8	18032.5	13141.8	6563.12	15513.2	16879.9	15123.3	17210	18134.3	18599	13354		3.7	1	FALSE	0.0001042	0.0001855
High	Unambiguous	[K].tSTTSSmVASAEQPR.[RG]	N-Term(TMTpro); M7(Oxidation)	2	Q6NXS1	Q6NXS1; P41236	0	2	0.5868	0	1	1	936.968	1872.93	1872.93	0.01	1e-05	CID (Collision Induced Dissociation)	MS2	0	15.1	119.5	53.2592	7403	201015L_YASAM07425_YAII63-14.raw	F4.10	3009.94	3147.84	2711.69	4562.16	2914.55	4243.57	3257.77	3120.98	1808.34	2563.9	4080.2	6288.4	4845.33	5164.96	6286.79	3239.59		4.38	1	FALSE	0.0001042	3.123e-06
High	Unambiguous	[R].nTDQASmPDNTAAQk.[V]	N-Term(TMTpro); M7(Oxidation); K15(TMTpro)	2	P35579	P35749; P35579	0	3	0.6144	0	1	1	739.376	2216.11	2216.11	1.46	0.00108	CID (Collision Induced Dissociation)	MS2	25.4798	10.8	11.129	53.2374	7392	201015L_YASAM07425_YAII63-14.raw	F4.10	7273.16	3845.99	9131.4	7648.57	5958.91	11029.2	11203.9	7477.9	1377.12	4435.94	9276.77	9284.95	9628.12	10539.8	8025.63	6366.79		4.85	1	FALSE	0.0001042	6.11e-07
High	Unambiguous	[K].hAVSEGTk.[A]	N-Term(TMTpro); K8(TMTpro)	15	Q16778; Q5QNW6	Q16778; Q5QNW6; Q99879; P33778; P58876; Q96A08; Q93079; O60814; Q99880; P62807; P57053; Q8N257; P06899; P23527; Q99877	0	3	0.65	0	1	1	479.616	1436.83	1436.84	-0.91	-0.00044	CID (Collision Induced Dissociation)	MS2	0	66	0.888	50.6749	6368	201015L_YASAM07425_YAII63-14.raw	F4.10	358703	282202	456865	404489	289426	592895	606168	444036	94170.7	269867	500221	572737	440242	630448	480243	242205		4.2	2	FALSE	0.0001042	4.11e-05
High	Unambiguous	[K].aQQNNVEHk.[V]	N-Term(TMTpro); K9(TMTpro)	1	P62081	P62081	0	3	0.5319	0	1	1	559.317	1675.94	1675.94	-0.82	-0.00046	CID (Collision Induced Dissociation)	MS2	0	16.3	1.974	50.1216	6169	201015L_YASAM07425_YAII63-14.raw	F4.10	34889.9	43375.4	62268.2	62401.4	64263.5	82073.2	90571.4	60058.1	18653.6	57464.6	66785.3	61551.1	86734	88221.4	67875.9	55974.5		4.55	1	FALSE	0.0001042	1.724e-06
High	Unambiguous	[K].aEGAQNQGQk.[G]	N-Term(TMTpro); K10(TMTpro)	1	Q9P2E9	Q9P2E9	0	2	0.5201	0	1	1	819.956	1638.9	1638.91	-0.41	-0.00033	CID (Collision Induced Dissociation)	MS2	0	22.5	119.5	49.9004	6093	201015L_YASAM07425_YAII63-14.raw	F4.10	3255.37	4471.18	5790.63	4084.27	3750.33	7993.95	8027.52	5775.15	2012.96	4737.97	7085.58	7104.74	6372.32	6866.36	7305.33	4228.86		4.23	1	FALSE	0.0001042	4.072e-05
High	Unambiguous	[R].nQGGYGGSSSSSSYGSGR.[R]	N-Term(TMTpro)	1	P09651	P09651	0	2	0.8029	0	1	1	999.956	1998.9	1998.91	-1.33	-0.00133	CID (Collision Induced Dissociation)	MS2	0	13.3	104.152	49.8862	6088	201015L_YASAM07425_YAII63-14.raw	F4.10	1806.27	3223.77	3110.87	3102.91	2969.42	6340.39	4688.16	3542.22	1344.06	2350.73	3871.16	3189.34	3003.47	3969.99	3852.12	2485.52		6.24	1	FALSE	0.0001042	5.349e-09
High	Unambiguous	[R].sQAGVSSGAPPGR.[N]	N-Term(TMTpro)	1	Q14980	Q14980	0	2	0.5508	0	1	1	737.899	1474.79	1474.79	-2.03	-0.00149	CID (Collision Induced Dissociation)	MS2	0	10.2	45.535	49.6714	6016	201015L_YASAM07425_YAII63-14.raw	F4.10	2633.98	2169.98	2116.12	2515.06	2425.99	3657.83	3293.39	2746.29	560.597	2335.45	2624.06	3325.62	2722.73	2560.63	2302.72	2120.29		3.25	1	FALSE	0.0001042	4.542e-05
High	Unambiguous	[R].qSSGASSSSFSSSR.[A]	N-Term(TMTpro)	1	O00571	O00571	0	2	0.6	0	1	1	833.403	1665.8	1665.8	-0.19	-0.00016	CID (Collision Induced Dissociation)	MS2	0	9.6	75.26	49.4868	5958	201015L_YASAM07425_YAII63-14.raw	F4.10	3086.14	2444.3	3009.89	2313.86	2697.17	2198.86	2568.86	1305.18	1991.52	1367.98	3541.86	1645.21	2805.12	2728.84	4109.25	1900.79		3.7	1	FALSE	0.0001042	1.352e-05
High	Unambiguous	[K].gSQITQQSTNQSR.[N]	N-Term(TMTpro)	1	P50750	P50750	0	2	0.4892	0	1	1	869.953	1738.9	1738.9	-0.62	-0.00054	CID (Collision Induced Dissociation)	MS2	33.7977	34.5	64.418	49.4702	5951	201015L_YASAM07425_YAII63-14.raw	F4.10	5443.7	5361.06	7778.62	6349.34	4122.74	11758.2	12329.4	6804.25	2136.79	24586.5	15442	9204.61	7261.9	6481	7262.71	3628.55		3.23	1	FALSE	0.0001042	5.33e-05
High	Unambiguous	[R].aSTSSSSSSSSNQQTEk.[E]	N-Term(TMTpro); K17(TMTpro)	1	P51965	P51965	0	2	0.6797	0	1	1	1156.08	2311.15	2311.15	-0.55	-0.00064	CID (Collision Induced Dissociation)	MS2	21.6201	5.3	119.5	49.4163	5935	201015L_YASAM07425_YAII63-14.raw	F4.10	1322.62	745.534	1079.34	1362.32	1145.22	1503.05	2704.89	1143.22		1203.93	1702.04	1895.81	754.709	2008.46	1188.59	829.864		6.37	1	FALSE	0.0001042	1.726e-10
High	Unambiguous	[K].tQEHFTHNTVR.[G]	N-Term(TMTpro)	1	Q08209	Q08209	0	2	0.4615	0	1	1	837.438	1673.87	1673.87	0.34	0.00029	CID (Collision Induced Dissociation)	MS2	22.9768	17.6	75.23	49.3404	5911	201015L_YASAM07425_YAII63-14.raw	F4.10	2405.25	2516.89	2784.94	2894.24	1514.59	3558.77	2911.38	2812.32	1225.33	2274.17	3203.58	6060.46	4020.84	18467.7	4341.84	9517.94		3.12	1	FALSE	0.0001042	0.0001748
High	Unambiguous	[R].aSTSSSSSSSSNQQTEk.[E]	N-Term(TMTpro); K17(TMTpro)	1	P51965	P51965	0	3	0.686	0	1	1	771.055	2311.15	2311.15	0.44	0.00034	CID (Collision Induced Dissociation)	MS2	47.1327	13.8	119.5	49.2858	5894	201015L_YASAM07425_YAII63-14.raw	F4.10	2647.33	1864.69	2664.65	2661.75	2028.77	10334.2	11047.2	3049.97	505.456	2162.39	2594.1	2386.4	2713.44	2975.12	2125.7	1815.5		5.86	1	FALSE	0.0001042	8.417e-08
High	Unambiguous	[K].sTSTPTSPGPR.[T]	N-Term(TMTpro)	1	Q8WWM7	Q8WWM7	0	2	0.6241	0	1	1	696.376	1391.74	1391.74	-0.04	-3e-05	CID (Collision Induced Dissociation)	MS2	0	18.1	24.512	49.1808	5860	201015L_YASAM07425_YAII63-14.raw	F4.10	4120.12	4367.16	4584.25	4902.04	3677.28	5563.23	4814.17	4489.11	2395.24	4024.46	5074.95	5335.02	4043.39	5851.82	4163.45	3890.61		2.82	1	FALSE	0.0001042	0.0003889
High	Unambiguous	[K].sSSSTTTNEk.[I]	N-Term(TMTpro); K10(TMTpro)	1	O14497	O14497	0	2	0.4404	0	1	1	825.445	1649.88	1649.88	-0.77	-0.00063	CID (Collision Induced Dissociation)	MS2	35.7149	58.4	28.348	49.0994	5833	201015L_YASAM07425_YAII63-14.raw	F4.10	4042.25	3051.36	4247.69	4826.36	4741.37	6349.34	7194.21	5054.9	3040.14	6065.59	12518.3	62225.5	38936.6	24197.1	40486.6	11236.1		3.61	1	FALSE	0.0001042	0.000317
High	Unambiguous	[K].tHMTHHAVSDHEATLR.[C]	N-Term(TMTpro)	13	P30457	P16190; P01892; P01891; P30456; P30457; P10314; P30450; P30453; P16189; P30512; P30459; P10316; P18462	0	3	0.7212	0	1	1	716.362	2147.07	2147.07	-1.4	-0.001	CID (Collision Induced Dissociation)	MS2	0	8.3	80.513	48.8376	5753	201015L_YASAM07425_YAII63-14.raw	F4.10	2764.99	1977.8	4018.18	3924.02	1488.82	4521.69	4315.93	3188.19	1113.17	2100.33	2805.22	3099.45	2990.61	3737.19	2027.39	1971.93		5.99	1	FALSE	0.0001042	7.075e-06
High	Unambiguous	[K].tHMTHHAVSDHEATLR.[C]	N-Term(TMTpro)	13	P30457	P16190; P01892; P01891; P30456; P30457; P10314; P30450; P30453; P16189; P30512; P30459; P10316; P18462	0	5	0.6905	0	1	1	430.221	2147.08	2147.07	2.18	0.00094	CID (Collision Induced Dissociation)	MS2	57.529	20.8	11.994	48.7358	5721	201015L_YASAM07425_YAII63-14.raw	F4.10	10212.4	10260.6	8714.21	12161.3	10875.4	10056.3	9623.78	10099.8	5748.79	10870	10972.9	9787.71	9762.57	11794.3	11378.4	7580.84		5.17	1	FALSE	0.0001042	8.242e-05
High	Unambiguous	[K].tHMTHHAVSDHEATLR.[C]	N-Term(TMTpro)	13	P30457	P16190; P01892; P01891; P30456; P30457; P10314; P30450; P30453; P16189; P30512; P30459; P10316; P18462	0	2	0.7264	0	1	1	1074.04	2147.07	2147.07	-1.93	-0.00208	CID (Collision Induced Dissociation)	MS2	0	0.9	119.5	48.6931	5709	201015L_YASAM07425_YAII63-14.raw	F4.10	1020.11	481.038		761.851	725.18	561.969												5.52	1	FALSE	0.0001042	1.572e-06
High	Unambiguous	[R].sQSAAVTPSSTTSSTR.[A]	N-Term(TMTpro)	1	Q16186	Q16186	0	2	0.634	0	1	1	936.484	1871.96	1871.96	-1.32	-0.00123	CID (Collision Induced Dissociation)	MS2	0	15.7	74.42	51.0454	6509	201015L_YASAM07425_YAII63-14.raw	F4.10	2154.47	2338.57	3864.97	3647.78	3088	2636.67	3556.8	2595.6	1893.34	3698.22	6003.45	5191.89	4727.39	5170.77	4592.86	4132.25		4.7	1	FALSE	0.0001042	7.264e-07
High	Unambiguous	[K].eENVGLHQTLDQTLNELNcI.[-]	N-Term(TMTpro); C19(Carbamidomethyl)	1	P67936	P67936	0	2	0.6434	0	1	1	1322.67	2644.32	2644.32	1.33	0.00175	CID (Collision Induced Dissociation)	MS2	0	1.8	119.5	79.8677	17091	201015L_YASAM07425_YAII63-13.raw	F4.9			529.514	744.694	618.505	906.807	744.922	509.266			890.906	778.44	771.742	599.918				5.16	1	FALSE	0.0001042	9.509e-05
High	Unambiguous	[R].sQSAAVTPSSTTSSTR.[A]	N-Term(TMTpro)	1	Q16186	Q16186	0	3	0.5522	0	1	1	624.659	1871.96	1871.96	0.11	7e-05	CID (Collision Induced Dissociation)	MS2	0	4.7	6.172	51.2665	6583	201015L_YASAM07425_YAII63-14.raw	F4.10	5990.77		8582.06	4477.54	3159.93	12273.1	15097.3	5004.67		4752.2	5946.16	9413.99	5977.73	9359.93	4427.29	4271.59		4.02	1	FALSE	0.0001042	3.417e-06
High	Unambiguous	[K].sNVSDAVAQSTR.[I]	N-Term(TMTpro)	1	P60174	P60174	0	2	0.4841	0	1	1	769.907	1538.81	1538.81	-1.74	-0.00134	CID (Collision Induced Dissociation)	MS2	0	13.1	66.485	51.5792	6709	201015L_YASAM07425_YAII63-14.raw	F4.10	3175.15	2955.69	3362.48	3708.27	2541.36	2970.56	3908.36	3941.52	1719.36	3105.07	3815.64	4129.1	3529.94	3028.04	3291.58	3031.51		3.47	1	FALSE	0.0001042	1.149e-05
High	Unambiguous	[R].nTDQASmPDNTAAQk.[V]	N-Term(TMTpro); M7(Oxidation); K15(TMTpro)	2	P35579	P35749; P35579	0	2	0.7011	0	1	1	1108.56	2216.11	2216.11	-1.65	-0.00183	CID (Collision Induced Dissociation)	MS2	0	5.4	72.98	53.2017	7377	201015L_YASAM07425_YAII63-14.raw	F4.10	902.792	539.046	1416.41	876.158		1983.67	917.563	1384.65		1018.19	2857.59	2262.24	2074.36	1953.47	2711.32	576.638		5.52	1	FALSE	0.0001042	2.55e-07
High	Unambiguous	[K].sSQGSSSSTQSAPSETASASk.[E]	N-Term(TMTpro); K21(TMTpro)	1	Q9ULU4	Q9ULU4	0	3	0.6755	0	1	1	860.768	2580.29	2580.29	0.33	0.00029	CID (Collision Induced Dissociation)	MS2	0	13.1	75.02	53.1873	7372	201015L_YASAM07425_YAII63-14.raw	F4.10	2963.17	2866.86	3497.51	3993.21	3635.32	3717.59	4712.38	3133.41	1083.33	2830.08	3826.63	3815.75	3510.59	4118.05	3049.51	2855.11		4.53	1	FALSE	0.0001042	2.95e-08
High	Unambiguous	[K].sSQGSSSSTQSAPSETASASk.[E]	N-Term(TMTpro); K21(TMTpro)	1	Q9ULU4	Q9ULU4	0	2	0.7404	0	1	1	1290.65	2580.29	2580.29	1.64	0.00212	CID (Collision Induced Dissociation)	MS2	0	0.1	71.48	53.1688	7365	201015L_YASAM07425_YAII63-14.raw	F4.10						578.221												5.7	1	FALSE	0.0001042	1.214e-07
High	Unambiguous	[R].tTAESQTTGk.[Q]	N-Term(TMTpro); K10(TMTpro)	1	Q5QJE6	Q5QJE6	0	2	0.5097	0	1	1	816.458	1631.91	1631.91	-0.67	-0.00054	CID (Collision Induced Dissociation)	MS2	25.3456	41.3	17.008	53.1315	7350	201015L_YASAM07425_YAII63-14.raw	F4.10	10163.1	9825.08	13182.6	12516.4	9827.61	16754.3	14892.2	10691.2	2359.56	8075.61	13332.8	14382.7	12680	15100	12209.8	8899.35		3.61	1	FALSE	0.0001042	0.0001279
High	Unambiguous	[K].aEGGGGGGRPGAPAAGDGk.[T]	N-Term(TMTpro); K19(TMTpro)	1	Q00839	Q00839	0	3	0.4665	0	1	1	716.386	2147.14	2147.14	-0.18	-0.00013	CID (Collision Induced Dissociation)	MS2	0	34.5	8.909	52.5299	7088	201015L_YASAM07425_YAII63-14.raw	F4.10	17516	12340.5	24225.6	16311.5	14541.9	23989.1	26590.8	17431.8	4134.88	13126.7	15448.7	20878.7	18995.1	25056.2	23507.6	11059.1		4.33	1	FALSE	0.0001042	0.0001427
High	Unambiguous	[K].gNTETSASASQTNHVk.[D]	N-Term(TMTpro); K16(TMTpro)	1	Q14004	Q14004	0	3	0.5978	0	1	1	747.395	2240.17	2240.18	-2.57	-0.00192	CID (Collision Induced Dissociation)	MS2	43.1423	15	75.78	52.4003	7036	201015L_YASAM07425_YAII63-14.raw	F4.10	3279.78	3706.53	3814.95	4236.13	3632.13	5039.45	4755.56	3638.87	1349.05	2961.47	4213.53	5450.84	4555.52	3652.99	4526.79	2963.08		4.6	1	FALSE	0.0001042	8.386e-08
High	Unambiguous	[R].smPEQTGEk.[-]	N-Term(TMTpro); M2(Oxidation); K9(TMTpro)	1	P62888	P62888	0	3	0.4115	0	1	1	544.291	1630.86	1630.86	-1.49	-0.00081	CID (Collision Induced Dissociation)	MS2	9.93921	15.2	2.742	52.3353	7009	201015L_YASAM07425_YAII63-14.raw	F4.10	40378.5	49278.9	52283.9	42589.9	38640.6	54672.1	57706.1	39883	8510.49	34795	65001	64949.6	47551.3	63557.7	60509.2	32103.6		4.18	1	FALSE	0.0001042	0.0003027
High	Unambiguous	[R].sGAGSSPETk.[E]	N-Term(TMTpro); K10(TMTpro)	1	Q9UQ35	Q9UQ35	0	2	0.5	0	1	1	764.926	1528.84	1528.85	-0.89	-0.00068	CID (Collision Induced Dissociation)	MS2	0	35.7	43.472	52.1504	6935	201015L_YASAM07425_YAII63-14.raw	F4.10	8039.09	6750.18	10345.8	10113.1	5817.25	9939.75	11959	8477.6	2587.84	5920.18	9339.69	10881.7	9885.85	12085.9	8954.79	6274.97		3.74	1	FALSE	0.0001042	0.0001335
High	Unambiguous	[K].sESAASSTGk.[E]	N-Term(TMTpro); K10(TMTpro)	1	Q15554	Q15554	0	2	0.5213	0	1	1	766.922	1532.84	1532.84	-2.43	-0.00186	CID (Collision Induced Dissociation)	MS2	0	14.7	57.908	51.8965	6828	201015L_YASAM07425_YAII63-14.raw	F4.10	2730.93	2940.07	3150.31	3618.11	3034.76	5053.44	5265.14	3236.5	1175.21	2318.8	3919.81	6138.8	4996.75	5327.61	4596.88	2242.19		4.22	1	FALSE	0.0001042	8.329e-05
High	Unambiguous	[K].yHTINGHNAEVR.[K]	N-Term(TMTpro)	1	P22626	P22626	0	3	0.673	0	1	1	572.303	1714.89	1714.89	-0.56	-0.00032	CID (Collision Induced Dissociation)	MS2	10.3329	11.8	1.502	51.8922	6826	201015L_YASAM07425_YAII63-14.raw	F4.10	44909.8	65795.1	66421.6	65940.6	53663.6	94855	65244.9	65129.5	35194.7	59131.3	56530	64670	55960.5	92310.7	64938.6	46325.8		4.77	1	FALSE	0.0001042	2.001e-07
High	Unambiguous	[R].dQSAQcTASk.[S]	N-Term(TMTpro); C6(Carbamidomethyl); K10(TMTpro)	1	Q7Z6Z7	Q7Z6Z7	0	2	0.5204	0	1	1	852.446	1703.89	1703.89	-1.32	-0.00113	CID (Collision Induced Dissociation)	MS2	0	25	44.278	51.7979	6791	201015L_YASAM07425_YAII63-14.raw	F4.10	5460	2844.77	5786.05	5146.45	3996.01	6986.12	6789.5	11057	2101.4	4157.32	9481.4	11298.3	6005.81	7932.22	5402.33	4674.67		4.17	1	FALSE	0.0001042	0.0003379
High	Unambiguous	[R].aTSSSSGSLSATGR.[L]	N-Term(TMTpro)	1	Q03252	Q03252	0	2	0.5825	0	1	1	786.911	1572.81	1572.81	-0.68	-0.00054	CID (Collision Induced Dissociation)	MS2	20.5937	21.2	25.393	51.7588	6777	201015L_YASAM07425_YAII63-14.raw	F4.10	7081.33	3632.37	9088.38	6219.51	4062.95	6400.37	5930.98	4415.61	2914.72	4110.59	5027.95	5644.04	4116.03	6521.73	5809.84	3359.89		4.12	1	FALSE	0.0001042	4.464e-05
High	Unambiguous	[K].yHTINGHNAEVR.[K]	N-Term(TMTpro)	1	P22626	P22626	0	4	0.6011	0	1	1	429.479	1714.89	1714.89	-0.93	-0.0004	CID (Collision Induced Dissociation)	MS2	0	21.6	2.593	51.7084	6760	201015L_YASAM07425_YAII63-14.raw	F4.10	52770.2	42696.6	39189.9	47748.5	33799.7	65733	53587.3	50551.9	20566	40914.6	42495.9	40697.9	50679.3	64595.5	39603.9	46385.9		3.71	1	FALSE	0.0001042	0.000153
High	Unambiguous	[K].yHTINGHNAEVR.[K]	N-Term(TMTpro)	1	P22626	P22626	0	2	0.6084	0	1	1	857.949	1714.89	1714.89	-1.98	-0.0017	CID (Collision Induced Dissociation)	MS2	0	18.2	85.964	51.659	6742	201015L_YASAM07425_YAII63-14.raw	F4.10	4902.69	5019.01	6562.76	5086.74	3868.14	6049.75	6073.92	4256.91	1709.28	3634.48	4536.37	4325.21	5190.68	5035.36	4977.75	3166.96		3.83	1	FALSE	0.0001042	0.000144
High	Unambiguous	[K].sSSSGSVGESSSk.[G]	N-Term(TMTpro); K13(TMTpro)	10	P13645	119581085; P13645; 244509; P13645; 88041; 547749; 106849; 71528; 284279; 244507	0	2	0.4897	0	1	1	897.471	1793.93	1793.94	-1.95	-0.00175	CID (Collision Induced Dissociation)	MS2	0	28.7	58.357	51.6027	6717	201015L_YASAM07425_YAII63-14.raw	F4.10	3523.85	3667.02	9708.01	11866.3	7410.55	5630.08	9775.67	9511.53	2713.49	4608.44	10748.6	10356.7	6968.98	11957.8	4880.1	3209.58		4.39	1	TRUE	0.0001042	0.0003595
High	Unambiguous	[R].aDSTSNAGGAk.[A]	N-Term(TMTpro); K11(TMTpro)	1	Q99684	Q99684	0	2	0.3875	0	1	1	793.933	1586.86	1586.86	-2.08	-0.00165	CID (Collision Induced Dissociation)	MS2	14.0892	26.1	71.27	51.4957	6673	201015L_YASAM07425_YAII63-14.raw	F4.10	4816.11	6081.07	6353.01	5472.78	5119.66	7620.68	7963.19	4727.11	1237.58	5298.78	6494.63	8217.51	7088.22	14852.9	6356.24	8306.45		3.51	1	FALSE	0.0001042	0.0001425
High	Unambiguous	[K].aIEPPPLDAVIEAEHTLR.[E]	N-Term(TMTpro)	1	Q08211	Q08211	0	3	0.7716	0	1	1	759.093	2275.27	2275.26	1.79	0.00136	CID (Collision Induced Dissociation)	MS2	0	3.7	59.934	79.827	17081	201015L_YASAM07425_YAII63-13.raw	F4.9	973.098	822.206	614.389	1327.59	861.301	921.77	1608.62	1001.42		810.668	849.396	606.033	1050.39	1455.82	1408.43	800.939		6.96	1	FALSE	0.0001042	1.289e-12
High	Unambiguous	[R].lTLEDLEDSWDR.[G]	N-Term(TMTpro)	1	Q6P2Q9	Q6P2Q9	0	2	0.3178	0	1	1	898.456	1795.91	1795.9	1.25	0.00112	CID (Collision Induced Dissociation)	MS2	20.0033	13.1	50.401	79.5785	17034	201015L_YASAM07425_YAII63-13.raw	F4.9	2847.72	2584.33	3964.96	4354.46	2550.65	4771.37	2659.74	3417.13	1191.05	3363.98	3950.51	5194.38	3485.38	5045.55	2105.41	2398.84		3.21	1	FALSE	0.0001042	0.0003556
High	Unambiguous	[R].lFSASEFEDPLVGEDTER.[A]	N-Term(TMTpro)	1	P37268	P37268	0	2	0.7258	0	1	1	1173.08	2345.15	2345.15	1.55	0.00182	CID (Collision Induced Dissociation)	MS2	0	2.9	119.5	79.4909	17017	201015L_YASAM07425_YAII63-13.raw	F4.9	971.867	578.933	834.699	1705.53	689.373	1084.12	1058	480.299		650.074	1478.99	729.835		616.314		712.76		5.69	1	FALSE	0.0001042	5.518e-08
High	Unambiguous	[K].aGTQIENIDEDFRDGLk.[L]	N-Term(TMTpro); K17(TMTpro)	1	O43707	O43707	1	3	0.5826	0	1	1	843.785	2529.34	2529.34	-1.02	-0.00086	CID (Collision Induced Dissociation)	MS2	0	33.1	22.854	72.4735	15485	201015L_YASAM07425_YAII63-13.raw	F4.9	6535.37	6517.98	8755.42	9984.29	5022.02	9926.64	12671.7	8612.85	2683.11	6009.83	8919.13	9937.39	9530.03	13111.2	11758.4	6222.16		5.75	1	FALSE	0.0001042	3.05e-06
High	Unambiguous	[K].tITLEVEPSDTIENVk.[A]	N-Term(TMTpro); K16(TMTpro)	4	P62979	P62987; P62979; P0CG47; P0CG48	0	2	0.5916	0	1	1	1198.67	2396.34	2396.34	-0.4	-0.00048	CID (Collision Induced Dissociation)	MS2	0	6.2	119.5	72.4608	15481	201015L_YASAM07425_YAII63-13.raw	F4.9	1036.47	1103.15	1192.01	1629.2	761.96	2184.61	2439.14	1871.57		1206.89	2010.21	2170.56	2272.91	1884.91	1885.69	892.016		6.17	1	FALSE	0.0001042	1.614e-07
High	Unambiguous	[K].sSEIEQAVQSLDR.[N]	N-Term(TMTpro)	1	Q9BPX5	Q9BPX5	0	2	0.3159	0	1	1	883.466	1765.92	1765.93	-0.29	-0.00026	CID (Collision Induced Dissociation)	MS2	33.4319	21.9	83.069	72.4362	15475	201015L_YASAM07425_YAII63-13.raw	F4.9	5822.56	4993.37	6364.36	6016.82	4459.35	5927.72	6739.51	5928.12	2402.55	3711.95	6085.16	6861.45	5322.14	6053.1	6058.71	3206.28		3.45	1	FALSE	0.0001042	8.956e-05
High	Unambiguous	[K].dELHIVEAEAmNYEGSPIk.[V]	N-Term(TMTpro); M11(Oxidation); K19(TMTpro)	1	P06748	P06748	0	3	0.6309	0	1	1	923.813	2769.43	2769.43	-0.13	-0.00012	CID (Collision Induced Dissociation)	MS2	14.8093	22.1	63.05	72.4183	15471	201015L_YASAM07425_YAII63-13.raw	F4.9	4696.41	4001.22	5788.98	6001.08	4625.66	6402.86	6912.83	6067.43	2159.16	4119.09	5523.01	8383.43	5464.86	7948.6	5404.83	3815.51		5.12	1	FALSE	0.0001042	6.953e-09
High	Unambiguous	[K].dTSATTALELVAGER.[L]	N-Term(TMTpro)	1	O95347	O95347	0	2	0.4399	0	1	1	919.496	1837.98	1837.98	0.64	0.00059	CID (Collision Induced Dissociation)	MS2	21.2774	16.1	74.54	72.378	15461	201015L_YASAM07425_YAII63-13.raw	F4.9	3846.27	4046.14	4343.25	3718.01	3139.09	5588.6	5186.94	3578.01	1214.01	3605.65	4796.26	5016.41	4157.43	4861.69	3902.22	3997.91		3.91	1	FALSE	0.0001042	4.792e-05
High	Unambiguous	[K].lPETNLFETEETR.[K]	N-Term(TMTpro)	1	Q15046	Q15046	0	2	0.3874	0	1	1	941.989	1882.97	1882.97	-0.07	-7e-05	CID (Collision Induced Dissociation)	MS2	48.6455	24.3	48.008	72.3457	15452	201015L_YASAM07425_YAII63-13.raw	F4.9	6207.22	5544.11	7743.47	7527.3	7288.59	7811.31	7951.06	5315.48	2449.9	5379.36	5845.24	7352.99	5927.19	7687.65	3827.04	5065.1		3.33	1	FALSE	0.0001042	2.453e-05
High	Unambiguous	[K].vDVEALENSAGATYIR.[K]	N-Term(TMTpro)	1	O76094	O76094	0	2	0.5763	0	1	1	1006.53	2012.06	2012.06	-0.92	-0.00092	CID (Collision Induced Dissociation)	MS2	9.50185	14	119.5	72.5305	15498	201015L_YASAM07425_YAII63-13.raw	F4.9	2946.63	2987	4328.95	4310.71	2473.03	4166.41	3775.02	3022.26	679.429	2723.17	2372.61	5442.26	3396.33	4135.66	4713.45	3103.41		4.13	1	FALSE	0.0001042	3.454e-07
High	Unambiguous	[R].tLPETLDPAEYNISPETR.[R]	N-Term(TMTpro)	1	O95168	O95168	0	2	0.7011	0	1	1	1175.61	2350.21	2350.21	-0.71	-0.00084	CID (Collision Induced Dissociation)	MS2	0	5.2	119.5	72.2344	15427	201015L_YASAM07425_YAII63-13.raw	F4.9	1468.68	1051.38	1364.62	771.042	1132.05	1365.96	1136.92	932.604	1112.49	1329.1	951.879	2065.78	1794.12	1641.73	915.547	994.421		4.65	1	FALSE	0.0001042	0.0002135
High	Unambiguous	[R].gVVDSEDIPLNLSR.[E]	N-Term(TMTpro)	1	Q12931	Q12931	0	2	0	0	1	1	909.5	1817.99	1817.99	0.16	0.00014	CID (Collision Induced Dissociation)	MS2	6.11818	44.4	27.862	72.0724	15390	201015L_YASAM07425_YAII63-13.raw	F4.9	12927.6	10905.1	13016.4	11143.3	10004.1	11571.1	11117.4	9724.14	5890.34	11630.2	14332.6	11581.5	12727.5	13681.7	10686.5	9462.14		3.61	1	FALSE	0.0001042	7.718e-06
High	Unambiguous	[K].lPETNLFETEETR.[K]	N-Term(TMTpro)	1	Q15046	Q15046	0	2	0.5575	0	1	1	941.99	1882.97	1882.97	0.06	6e-05	CID (Collision Induced Dissociation)	MS2	43.3019	33.6	46.573	72.0333	15380	201015L_YASAM07425_YAII63-13.raw	F4.9	8768.07	7135.17	12392.5	8769.74	8167.36	11371.5	7318.24	8076.68	3541.54	7569.56	10506.7	12285.9	7790.69	8611.23	6048.73	7819.29		4.09	1	FALSE	0.0001042	8.423e-05
High	Unambiguous	[K].lPETNLFETEETR.[K]	N-Term(TMTpro)	1	Q15046	Q15046	0	2	0.4331	0	1	1	941.989	1882.97	1882.97	-0.52	-0.00049	CID (Collision Induced Dissociation)	MS2	12.6437	23.2	76.065	71.854	15342	201015L_YASAM07425_YAII63-13.raw	F4.9	6354.76	4641.05	8276.43	6163.17	6019.61	8136.89	6423.63	6134.29	1889.85	5384.29	7086.58	6609.89	5000.23	6829.58	4030.87	3197.66		3.81	1	FALSE	0.0001042	0.000107
High	Unambiguous	[K].lPETNLFETEETR.[K]	N-Term(TMTpro)	1	Q15046	Q15046	0	2	0.3966	0	1	1	941.99	1882.97	1882.97	0.19	0.00018	CID (Collision Induced Dissociation)	MS2	49.0472	22.4	58.165	71.836	15335	201015L_YASAM07425_YAII63-13.raw	F4.9	4220.42	4688.18	5858.49	5400.38	4860.46	7607.05	8377.77	5440.31	1964.73	4471.91	6958.72	6863.48	5207.22	6325.51	4925.01	3591.65		3.58	1	FALSE	0.0001042	2.026e-05
High	Unambiguous	[K].dATNVGDEGGFAPNILENk.[E]	N-Term(TMTpro); K19(TMTpro)	1	P06733	P06733	0	3	0.573	0	1	1	857.118	2569.34	2569.34	0.17	0.00014	CID (Collision Induced Dissociation)	MS2	52.2118	14.3	29.877	71.7434	15308	201015L_YASAM07425_YAII63-13.raw	F4.9	3465.33	3571.74	3586.4	2695.58	3204.58	5282.2	5178.69	3102.8	958.599	2428.56	3539.27	4416.23	3827.58	5843.77	4822.47	2515.21		3.56	1	FALSE	0.0001042	2.14e-06
High	Unambiguous	[K].eGMNIVEAMER.[F]	N-Term(TMTpro)	1	P62937	P62937	0	2	0.524	0	1	1	791.898	1582.79	1582.79	-0.13	-0.0001	CID (Collision Induced Dissociation)	MS2	22.3127	18.4	22.614	71.712	15300	201015L_YASAM07425_YAII63-13.raw	F4.9	6030.9	3364.61	4309.2	5800.21	4842.69	5295.16	6102.74	4047.83	2320.36	3965.53	4760.59	5146.95	5253.08	5769.37	4247.1	3659.35		3.34	1	FALSE	0.0001042	0.0001435
High	Unambiguous	[R].iFTSIGEDYDER.[V]	N-Term(TMTpro)	1	P35232	P35232	0	2	0.5	0	1	1	874.938	1748.87	1748.87	1.21	0.00106	CID (Collision Induced Dissociation)	MS2	0	27.5	52.788	72.1708	15414	201015L_YASAM07425_YAII63-13.raw	F4.9	5970.38	6389.16	6530.76	8194.86	5955.71	7801.58	9201.21	7303.47	2746.1	5708.29	7598.14	7169.17	7063.2	8927.07	7502.24	5655.11		3.86	1	FALSE	0.0001042	3.765e-05
High	Unambiguous	[KR].sYELPDGQVITIGNER.[F]	N-Term(TMTpro)	10	P60709; P68133; Q562R1	A5A3E0; P63267; Q9BYX7; P60709; Q6S8J3; P62736; P68133; Q562R1; P68032; P63261	0	2	0.6266	0	1	1	1048.05	2095.1	2095.1	-0.88	-0.00092	CID (Collision Induced Dissociation)	MS2	0	12.2	119.5	72.5362	15500	201015L_YASAM07425_YAII63-13.raw	F4.9	3159.68	4417.75	3077.04	2970	2307.03	3335.03	3833.59	2474.67	1187.56	2479.94	4168.37	4309.33	2927.37	3073.96	2769.98	3224.25		4.82	3	FALSE	0.0001042	1.616e-06
High	Unambiguous	[K].lEcSEELGDLVk.[ST]	N-Term(TMTpro); C3(Carbamidomethyl); K12(TMTpro)	2	Q00610	Q00610; P53675	0	2	0.3839	0	1	1	1000.55	2000.09	2000.09	-0.65	-0.00065	CID (Collision Induced Dissociation)	MS2	12.3521	18.1	119.5	72.5969	15517	201015L_YASAM07425_YAII63-13.raw	F4.9	4705.94	3321.23	5481.78	4518.68	3146.47	5968.73	6792.89	5011.36	1268.31	2779.89	5743	4745.96	4893.5	6163.69	6259.98	3359.36		3.36	1	FALSE	0.0001042	4.165e-05
High	Unambiguous	[K].tITLEVEPSDTIENVk.[A]	N-Term(TMTpro); K16(TMTpro)	4	P62979	P62987; P62979; P0CG47; P0CG48	0	3	0.37	0	1	1	799.453	2396.34	2396.34	1.04	0.00083	CID (Collision Induced Dissociation)	MS2	5.09148	8.7	96.513	72.6117	15521	201015L_YASAM07425_YAII63-13.raw	F4.9	1944.28	1480.81	3106.38	1793.78	2862.41	2263.86	2928.12	2736.49	750.983	1456.75	2498.25	3052.31	1863.74	3367.15	1969.89	1218.11		3	1	FALSE	0.0001042	1.984e-05
High	Unambiguous	[K].dVIELTDDSFDk.[N]	N-Term(TMTpro); K12(TMTpro)	1	Q15084	Q15084	0	2	0.4657	0	1	1	1003.03	2005.06	2005.06	-0.15	-0.00015	CID (Collision Induced Dissociation)	MS2	9.02057	18	90.995	73.5206	15732	201015L_YASAM07425_YAII63-13.raw	F4.9	4496.71	2594.23	5332.91	4430.65	3787.94	6851.53	7422.81	4901.22	1686.8	2527.04	4246.29	5882.25	4525.14	5668.48	4093.6	3655.7		3.5	1	FALSE	0.0001042	4.392e-06
High	Unambiguous	[KR-].lGEHNIDVLEGNEQFINAAR.[I]	N-Term(TMTpro)	3	P00761	P00761; PromTArt7; PromTArt5	0	2	0.668	0	1	1	1272.16	2543.3	2543.32	-4.95	-0.0063	CID (Collision Induced Dissociation)	MS2	0	2.7	119.5	73.497	15725	201015L_YASAM07425_YAII63-13.raw	F4.9		874.207	816.504	608.094		864.41	912.19			908.039	1124.08	1963.56	1222.13	1477.53	536.048			4.91	1	TRUE	0.0001042	8.212e-05
High	Unambiguous	[K].lEGTEDLSDVLVR.[Q]	N-Term(TMTpro)	1	Q15003	Q15003	0	2	0.4774	0	1	1	875.482	1749.96	1749.96	0.42	0.00037	CID (Collision Induced Dissociation)	MS2	48.6362	17.2	102.948	73.454	15716	201015L_YASAM07425_YAII63-13.raw	F4.9	4645.99	3635.81	4527.36	5264.81	5265.69	5843.66	4841.11	4152.58	2428.83	2830.03	4715.31	5357.61	5394.17	3560.13	4457.75	2333.31		3.54	1	FALSE	0.0001042	7.176e-05
High	Unambiguous	[KR].lTVEDPVTVEYITR.[FY]	N-Term(TMTpro)	2	O14818	Q8TAA3; O14818	0	2	0.4578	0	1	1	970.039	1939.07	1939.07	0.51	0.00049	CID (Collision Induced Dissociation)	MS2	17.3319	19.3	94.876	73.2719	15680	201015L_YASAM07425_YAII63-13.raw	F4.9	3212.97	4707.37	5798.21	5483.67	6135.64	5562.15	5960.68	4382.91	2011.14	4044.02	5213.23	6793.57	5782.97	6261.45	4611.07	3646.1		3.91	1	FALSE	0.0001042	4.724e-05
High	Unambiguous	[K].tQPYDVYDQVEFDVPVGSR.[G]	N-Term(TMTpro)	1	O75306	O75306	0	3	0.5636	0	1	1	840.084	2518.24	2518.24	-1.79	-0.00151	CID (Collision Induced Dissociation)	MS2	28.7347	11.9	54.093	73.2125	15667	201015L_YASAM07425_YAII63-13.raw	F4.9	3780.45	2305.79	3852.92	3177.82	2114.41	3412.4	3781.6	1743.1	1426.05	2391.72	3287.49	3216.35	3409.58	3174.47	2354.97	2206.24		3.85	1	FALSE	0.0001042	0.0001511
High	Unambiguous	[K].vLAGETLSVNDPPDVLDR.[Q]	N-Term(TMTpro)	1	Q12906	Q12906	0	2	0.5216	0	1	1	1107.6	2214.19	2214.19	0.09	0.0001	CID (Collision Induced Dissociation)	MS2	69.4133	16.8	67.36	73.1141	15648	201015L_YASAM07425_YAII63-13.raw	F4.9	3704.46	3438.14	3502.4	4063.29	4441.27	4542.28	4191.98	4264.71	2330.25	3237.93	4195.44	5416.19	4728.58	4984.67	4245.77	4189.47		3.47	1	FALSE	0.0001042	3.669e-05
High	Unambiguous	[K].tQPYDVYDQVEFDVPVGSR.[G]	N-Term(TMTpro)	1	O75306	O75306	0	2	0.7181	0	1	1	1259.62	2518.24	2518.24	-0.24	-0.0003	CID (Collision Induced Dissociation)	MS2	0	3	119.5	73.0669	15637	201015L_YASAM07425_YAII63-13.raw	F4.9	976.31	827.274	1637.07	793.903	638.959	1265.39	1090.37	817.02			1021.69	920.671		699.802	719.247	626.053		5.25	1	FALSE	0.0001042	5.131e-05
High	Unambiguous	[K].fAMEPEEFDSDTLR.[E]	N-Term(TMTpro)	1	P13667	P13667	0	2	0.5765	0	1	1	995.972	1990.94	1990.94	-0.84	-0.00083	CID (Collision Induced Dissociation)	MS2	0	10.3	106.726	72.9945	15618	201015L_YASAM07425_YAII63-13.raw	F4.9	2318.8	1921.58	3210.05	2490.63	2871.77	2826.52	3265.63	2647.86	1108.28	3098.02	3002.43	3427.22	2119.13	3176.54	2779.15	1251.98		3.66	1	FALSE	0.0001042	1.606e-05
High	Unambiguous	[R].mENGVLGNALEGVHVEEEEGEk.[T]	N-Term(TMTpro); K22(TMTpro)	1	P49321	P49321	0	3	0.6807	0	1	1	993.174	2977.51	2977.51	0.46	0.00046	CID (Collision Induced Dissociation)	MS2	8.05009	15.6	73.94	72.941	15601	201015L_YASAM07425_YAII63-13.raw	F4.9	3525.46	2963.43	3276.89	3997.78	3411.95	6208.64	6572.1	4067.69	1522.7	2884.44	4422.08	4938.37	4114.95	5118.23	4627.87	3169.48		5.7	1	FALSE	0.0001042	2.394e-10
High	Unambiguous	[R].aGGIETIANEFSDR.[C]	N-Term(TMTpro)	1	Q92598	Q92598	0	2	0.5324	0	1	1	892.461	1783.91	1783.91	0.02	2e-05	CID (Collision Induced Dissociation)	MS2	35.9038	14.7	112.356	72.9371	15600	201015L_YASAM07425_YAII63-13.raw	F4.9	3994.83	3252.45	3901.23	4146.37	4664.94	2976.93	3341.34	3783.03	1754.57	4170.42	4575.97	4535.13	3556.67	4654.69	3468.88	3300.67		4.32	1	FALSE	0.0001042	5.731e-06
High	Unambiguous	[R].aEPEDHYFLLTEPPLNTPENR.[E]	N-Term(TMTpro)	1	P61158	P61158	0	3	0.6047	0	1	1	929.47	2786.4	2786.4	0.1	9e-05	CID (Collision Induced Dissociation)	MS2	30.7938	28.4	19.044	72.8826	15587	201015L_YASAM07425_YAII63-13.raw	F4.9	7634.87	7695.9	8877.44	9529.38	7276.46	8393.81	8630.77	7360.65	3780.65	6108.4	9967.9	10532	8275.14	8409.61	8359.24	5632.88		4.25	1	FALSE	0.0001042	7.891e-08
High	Unambiguous	[KR].sYELPDGQVITIGNER.[F]	N-Term(TMTpro)	10	P60709; P68133; Q562R1	A5A3E0; P63267; Q9BYX7; P60709; Q6S8J3; P62736; P68133; Q562R1; P68032; P63261	0	3	0.537	0	1	1	699.038	2095.1	2095.1	0.83	0.00058	CID (Collision Induced Dissociation)	MS2	4.61118	5.3	12.929	72.8485	15575	201015L_YASAM07425_YAII63-13.raw	F4.9	1672.41	1304.3	1741.95	1135.66	864.691	1774.27	1757.13	1136.98	586.968	1416.91	1507.6	1065.01	1526.3	1111.43	1512.48	857.909		3.11	3	FALSE	0.0001042	0.0003725
High	Unambiguous	[R].yINENLIVNTDELGR.[D]	N-Term(TMTpro)	1	P17987	P17987	0	2	0.5625	0	1	1	1034.06	2067.1	2067.1	-0.52	-0.00054	CID (Collision Induced Dissociation)	MS2	13.9416	13.3	119.5	72.7746	15560	201015L_YASAM07425_YAII63-13.raw	F4.9	2851.78	2294.92	4688.96	3198.34	2909.07	5062.34	3608.91	4177.66	2286.85	3411.63	4047.91	3237.91	2577.67	3215.49	2839.09	3292.04		4.48	1	FALSE	0.0001042	5.034e-06
High	Unambiguous	[K].dELHIVEAEAmNYEGSPIk.[V]	N-Term(TMTpro); M11(Oxidation); K19(TMTpro)	1	P06748	P06748	0	4	0.6262	0	1	1	693.112	2769.43	2769.43	0.48	0.00033	CID (Collision Induced Dissociation)	MS2	62.6408	2.7	23.75	72.7209	15548	201015L_YASAM07425_YAII63-13.raw	F4.9	1222.64	1330.89	969.156			2425.63	1260.33	2021.44			2742.67	1552.99	1700.86	1601.84	2589.49	1816.86		4.12	1	FALSE	0.0001042	5.723e-07
High	Unambiguous	[K].eEASDYLELDTIk.[N]	N-Term(TMTpro); K13(TMTpro)	1	P14625	P14625	0	2	0.6242	0	1	1	1067.58	2134.14	2134.14	0.83	0.00088	CID (Collision Induced Dissociation)	MS2	77.9821	12.3	73.31	72.658	15535	201015L_YASAM07425_YAII63-13.raw	F4.9	2575.54	2431.88	3797.26	2750.21	2079.08	5236.99	4323.65	2747.86	1597.21	3260.87	3072.87	3462.35	2480.15	6200	3395.99	2190.13		4.47	1	FALSE	0.0001042	4.666e-06
High	Unambiguous	[K].tAVDGPDLEMLTGQER.[V]	N-Term(TMTpro)	1	Q14318	Q14318	0	2	0.5942	0	1	1	1018.52	2036.03	2036.03	-1.72	-0.00175	CID (Collision Induced Dissociation)	MS2	26.089	10.5	109.841	71.6795	15290	201015L_YASAM07425_YAII63-13.raw	F4.9	2327.48	2000.7	3056.47	2453.02	2500.26	3710.35	3569.81	1768.85	1169.24	2191.15	2983.58	3124.8	2513.69	3160.68	3729.42	2192.43		4.14	1	FALSE	0.0001042	2.731e-05
High	Unambiguous	[K].eDIYAVEIVGGATR.[I]	N-Term(TMTpro)	1	P34932	P34932	0	2	0.4019	0	1	1	898.99	1796.97	1796.97	0.82	0.00074	CID (Collision Induced Dissociation)	MS2	9.36873	16.1	81.839	71.6406	15280	201015L_YASAM07425_YAII63-13.raw	F4.9	4055.5	2863.54	4005.4	3360.51	2966.33	4836.28	5365.91	4443.3	1713.11	3597.02	4125.76	4556	3903.95	4804.78	3629.59	4630.04		3.16	1	FALSE	0.0001042	6.722e-05
High	Unambiguous	[R].aPWVEQEGPEYWDR.[NE]	N-Term(TMTpro)	13	P30508	P30492; Q95604; P30499; Q29960; Q29963; Q29865; Q07000; P04222; Q9TNN7; P30505; P10321; P30510; P30508	0	2	0.611	0	1	1	1033.5	2066	2065.99	0.86	0.00089	CID (Collision Induced Dissociation)	MS2	18.9531	11.9	105.086	71.5719	15260	201015L_YASAM07425_YAII63-13.raw	F4.9	2893.8	2183.55	3005.38	2643.33	2800.42	3141.88	3143.37	4232.55	1611.68	3026.27	3402.51	3568.56	3328.04	4000.69	2898.54	2356.33		3.47	1	FALSE	0.0001042	0.0002142
High	Unambiguous	[R].lAETQEEISAEVAAk.[A]	N-Term(TMTpro); K15(TMTpro)	1	Q9Y383	Q9Y383	0	2	0.5049	0	1	1	1099.11	2197.22	2197.22	-0.22	-0.00024	CID (Collision Induced Dissociation)	MS2	23.5701	16	119.5	71.5426	15251	201015L_YASAM07425_YAII63-13.raw	F4.9	3353.09	3083.79	4769.81	5025.53	2602.81	4756.09	6356.08	3766	1672.5	2255.14	4455.02	6865.97	4678.52	6054.61	2787.52	3628.07		5.09	1	FALSE	0.0001042	1.01e-06
High	Unambiguous	[K].nLQcLVIDEADR.[I]	N-Term(TMTpro); C4(Carbamidomethyl)	1	Q9NVP1	Q9NVP1	0	2	0.4282	0	1	1	875.459	1749.91	1749.91	-0.45	-0.00039	CID (Collision Induced Dissociation)	MS2	34.5722	18.4	60.224	70.7385	15059	201015L_YASAM07425_YAII63-13.raw	F4.9	5560.92	4220.54	6064.79	4168.78	3588.35	4650.23	5506.68	3287.62	2581.54	3499.17	4334.8	6497.11	4777.57	5419.93	4434.42	4888.37		3.69	1	FALSE	0.0001042	0.0001088
High	Unambiguous	[K].eIETYHNLLEGGQEDFESSGAGk.[I]	N-Term(TMTpro); K23(TMTpro)	3	P35527	547748; 1082558; P35527	0	3	0.6259	0	1	1	1040.19	3118.55	3118.55	0.14	0.00014	CID (Collision Induced Dissociation)	MS2	0	17.3	110.234	70.699	15050	201015L_YASAM07425_YAII63-13.raw	F4.9	3356.35	3861.17	6709.04	6777.1	3571.78	3492	3001.81	3206.86	1795.45	2452.73	7733.57	7827.12	5006.74	6584.73	2423.91	2115.28		7.94	1	TRUE	0.0001042	4.553e-10
High	Unambiguous	[R].aLEYTIYNQELNETR.[A]	N-Term(TMTpro)	1	Q9UQE7	Q9UQE7	0	2	0.5162	0	1	1	1081.06	2161.11	2161.11	-0.89	-0.00096	CID (Collision Induced Dissociation)	MS2	9.11044	9.9	119.5	70.6862	15046	201015L_YASAM07425_YAII63-13.raw	F4.9	1689.07	2419.36	2106.41	2699.14	2248.05	3590.59	2534.15	2378.09	1125.41	1985.46	3276.08	3000.07	1922.44	2807.45	2871.8	1555.75		5.56	1	FALSE	0.0001042	2.462e-07
High	Unambiguous	[K].dNFWEMGDTGPcGPcSEIHYDR.[I]	N-Term(TMTpro); C12(Carbamidomethyl); C15(Carbamidomethyl)	1	P49588	P49588	0	3	0.724	0	1	1	983.086	2947.24	2947.24	0.63	0.00062	CID (Collision Induced Dissociation)	MS2	58.2634	11	74.03	70.5265	15002	201015L_YASAM07425_YAII63-13.raw	F4.9	2703.04	1985.67	3569.45	2774.77	1636.68	2857.96	3289.05	2795.66	1427.83	2321.1	3122.27	4514.45	2365.38	3494.23	2498.14	1908.54		6.74	1	FALSE	0.0001042	1.474e-07
High	Unambiguous	[K].iLDQGEDFPASEMTR.[I]	N-Term(TMTpro)	1	P30040	P30040	0	2	0.4612	0	1	1	1007	2012.99	2012.99	-1.73	-0.00175	CID (Collision Induced Dissociation)	MS2	0	22.5	119.5	70.5104	14997	201015L_YASAM07425_YAII63-13.raw	F4.9	5014.34	4671.21	5296.76	5375.63	5956.57	7294.23	5419.29	5912.54	1995.22	5439.99	6625.43	8007.91	6013.73	5300.53	5230.08	3752.58		4.25	1	FALSE	0.0001042	6.246e-05
High	Unambiguous	[K].yDGSTIVPGEQGAEYQHFIQQcTDDVR.[L]	N-Term(TMTpro); C22(Carbamidomethyl)	1	Q14019	Q14019	0	3	0.6837	0	1	1	1139.87	3417.6	3417.6	-0.44	-0.0005	CID (Collision Induced Dissociation)	MS2	13.4677	8.6	108.997	70.3984	14966	201015L_YASAM07425_YAII63-13.raw	F4.9	3241.53	1973.63	2169.41	1663.71	2549.34	2006.54	2330.44	1907.01	1352.48	2465.03	1913.02	2010.23	2311.08	2068.32	2270.33	1712.41		4.9	1	FALSE	0.0001042	2.135e-05
High	Unambiguous	[K].kEDGTFYEFGEDIPEAPER.[L]	N-Term(TMTpro); K1(TMTpro)	1	O43776	O43776	1	3	0.5655	0	1	1	946.475	2837.41	2837.41	-1.14	-0.00108	CID (Collision Induced Dissociation)	MS2	23.892	29	60.918	70.3656	14956	201015L_YASAM07425_YAII63-13.raw	F4.9	7989.46	7703.53	7792.28	9027.45	5459.2	9890.64	9460.63	7142.11	1792.2	5992.97	7303.83	8222.12	7733.47	8061.24	8685.05	5594.4		4.12	1	FALSE	0.0001042	1.374e-05
High	Unambiguous	[R].fDGILTEGEGPR.[R]	N-Term(TMTpro)	1	Q96HE7	Q96HE7	0	2	0.3147	0	1	1	797.924	1594.84	1594.84	0.56	0.00045	CID (Collision Induced Dissociation)	MS2	76.4564	9.9	59.837	70.3122	14940	201015L_YASAM07425_YAII63-13.raw	F4.9	2741.68	2491.74	2945.85	3284.64	2435.43	3038.11	2286	1742.05	964.078	2694.97	2405.72	3228.74	2777.5	2433.12	2228.82	2321.07		2.32	1	FALSE	0.0001042	0.00028
High	Unambiguous	[K].dTVATQLSEAVDATR.[G]	N-Term(TMTpro)	1	O60664	O60664	0	2	0.513	0	1	1	940.999	1880.99	1880.99	0.78	0.00073	CID (Collision Induced Dissociation)	MS2	33.4926	42.1	45.73	70.3008	14935	201015L_YASAM07425_YAII63-13.raw	F4.9	9558.91	10918.4	10544.4	10891.8	9472.86	11556.2	12291.5	11410.3	3332.22	8662.54	11176	13879.9	9495.89	11416.7	12034.3	8446.81		3.84	1	FALSE	0.0001042	1.645e-06
High	Unambiguous	[K].gDEEGVPAVVIDmSGLR.[E]	N-Term(TMTpro); M13(Oxidation)	1	P13796	P13796	0	3	0.5248	0	1	1	688.691	2064.06	2064.06	-0.63	-0.00043	CID (Collision Induced Dissociation)	MS2	0	1	51.513	70.2348	14915	201015L_YASAM07425_YAII63-13.raw	F4.9		515.786	771.079			572.963				643.408	796.967			473.211				3.83	1	FALSE	0.0001042	9.682e-06
High	Unambiguous	[K].eVDVGLAADVGTLQR.[L]	N-Term(TMTpro)	1	Q13011	Q13011	0	2	0.4444	0	1	1	924.014	1847.02	1847.02	1.18	0.00109	CID (Collision Induced Dissociation)	MS2	14.4811	26.9	95.044	70.2266	14912	201015L_YASAM07425_YAII63-13.raw	F4.9	6838.81	5824.69	6670.58	6187.49	5529.72	6124.13	7803.9	7594.5	2533.89	6011.33	6195.77	8219.92	6485.7	8333.64	6376	4879.84		3.24	1	FALSE	0.0001042	0.0001074
High	Unambiguous	[K].sDYDmVDYLNELR.[E]	N-Term(TMTpro); M5(Oxidation)	1	Q14974	Q14974	0	2	0.6408	0	1	1	976.965	1952.92	1952.92	-0.59	-0.00058	CID (Collision Induced Dissociation)	MS2	14.8099	16	97.339	70.1068	14878	201015L_YASAM07425_YAII63-13.raw	F4.9	3930.1	4128.48	5520.03	3709.64	2957.67	5703.26	4348.99	3068.13	1240.71	3866.93	4939.43	5619.48	4161.78	5177.41	4263.37	2942.07		3.09	1	FALSE	0.0001042	0.0003351
High	Unambiguous	[R].vLYVQDSLEGEAR.[V]	N-Term(TMTpro)	1	P48147	P48147	0	2	0.5512	0	1	1	891.982	1782.96	1782.96	0.5	0.00045	CID (Collision Induced Dissociation)	MS2	0	17.5	46.072	70.0555	14863	201015L_YASAM07425_YAII63-13.raw	F4.9	4452.13	4156.75	5306.16	4157.54	3665.57	6073.62	5267.02	4171.82	1543.76	3865.03	4571.81	5782.66	4977.89	5779.31	4640.06	3614.77		3.81	1	FALSE	0.0001042	5.385e-05
High	Unambiguous	[R].hDIAFVEFDNEVQAGAAR.[D]	N-Term(TMTpro)	1	P09012	P09012	0	3	0.6522	0	1	1	765.057	2293.16	2293.15	1.33	0.00102	CID (Collision Induced Dissociation)	MS2	45.6518	3.5	75.83	70.0443	14860	201015L_YASAM07425_YAII63-13.raw	F4.9	1358.46	725.918	1309.61	709.274	573.827	989.633	1323.64	957.533		612.744	1275.25	1118.52	769.203	1203.71	641.026	710.452		4.83	1	FALSE	0.0001042	3.271e-06
High	Unambiguous	[K].wSLELEDQER.[H]	N-Term(TMTpro)	1	P37198	P37198	0	2	0.3134	0	1	1	804.913	1608.82	1608.82	-0.51	-0.00041	CID (Collision Induced Dissociation)	MS2	23.3891	13	32.429	69.9627	14836	201015L_YASAM07425_YAII63-13.raw	F4.9	3758.05	3948.38	4041.4	3569.08	2857.85	4156.11	3845.96	2816.95	1909.74	2994.44	4041.06	4420.6	3536.09	3855.46	3139.05	2080.17		3.51	1	FALSE	0.0001042	0.0001559
High	Unambiguous	[K].lQEEMLQREEAENTLQSFR.[Q]	N-Term(TMTpro)	1	P08670	P08670	1	3	0.5665	0	1	1	885.784	2655.34	2655.34	0.61	0.00054	CID (Collision Induced Dissociation)	MS2	5.50701	16.7	44.413	70.7657	15068	201015L_YASAM07425_YAII63-13.raw	F4.9	4669.72	4898.85	2553.99	3912.86	3765.25	3539	4675.52	4304.94	2471.31	3863.53	5856.27	2609.39	4307.5	3158.73	7693.28	4323.85		5.26	1	TRUE	0.0001042	0.00039
High	Unambiguous	[K].tEEELLETTLk.[M]	N-Term(TMTpro); K11(TMTpro)	1	P23141	P23141	0	2	0.4506	0	1	1	957.55	1914.09	1914.09	-0.12	-0.00012	CID (Collision Induced Dissociation)	MS2	12.881	24.6	116.919	73.6072	15753	201015L_YASAM07425_YAII63-13.raw	F4.9	4796.89	4324.86	6870.82	6019.84	5178.37	8712.55	9614	5636.79	945.854	5310.21	6982	8208.75	6406.37	9837.11	6864.77	5324.8		3.95	1	FALSE	0.0001042	0.0001101
High	Unambiguous	[R].dSLLQDGEFSmDLR.[T]	N-Term(TMTpro); M11(Oxidation)	1	P07737	P07737	0	3	0.6976	0	1	1	649.323	1945.96	1945.95	3.23	0.00209	CID (Collision Induced Dissociation)	MS2	0	3.9	21.952	70.7685	15069	201015L_YASAM07425_YAII63-13.raw	F4.9	1093.86	1729.93	1055.34	925.801	625.321	737.715	1376.36	527.018		1153.7	749.579	1464.34	789.824	1458.5	1183.02	610.241		5.72	1	FALSE	0.0001042	2.442e-05
High	Unambiguous	[R].sEAPNWATQDSGFY.[-]	N-Term(TMTpro)	1	P60228	P60228	0	2	0.7587	0	1	1	938.938	1876.87	1876.87	0.63	0.00059	CID (Collision Induced Dissociation)	MS2	8.67863	11.9	119.5	70.8882	15094	201015L_YASAM07425_YAII63-13.raw	F4.9	2723.64	2060.82	3670.35	3009.93	3000.06	3571.17	3868.6	2988.52	1356.84	2613.67	3621.15	3313.64	3442.68	3397.27	2295.31	2305.57		4.02	1	FALSE	0.0001042	0.0001199
High	Unambiguous	[KN].vDVDVPDVNIEGPDAk.[L]	N-Term(TMTpro); K16(TMTpro)	1	Q09666	Q09666	0	2	0.5276	0	1	1	1145.62	2290.24	2290.24	-0.84	-0.00096	CID (Collision Induced Dissociation)	MS2	0	9.8	119.5	71.4655	15233	201015L_YASAM07425_YAII63-13.raw	F4.9	2133.49	2134.67	3198.21	2134.09	1702.45	3007.29	3246.4	2600.77		1766.69	1823.08	3878.5	2475.37	2814.03	3285.25	1979.77		5.25	1	FALSE	0.0001042	4.698e-06
High	Unambiguous	[K].aSYDVSDSGQLEHVQPWSV.[-]	N-Term(TMTpro)	1	Q01813	Q01813	0	2	0.671	0	1	1	1204.59	2408.17	2408.17	-1.39	-0.00168	CID (Collision Induced Dissociation)	MS2	18.8971	5.4	119.5	71.4535	15230	201015L_YASAM07425_YAII63-13.raw	F4.9	1389.75	1015.14	1880.28	1462.98	1043.77	1841.85	1258.02	1359.1		1678.47	910.508	1714.2	1380.83	1684.68	1475.94	1175.44		5.41	1	FALSE	0.0001042	1.899e-06
High	Unambiguous	[K].gDDLLPAGTEDYIHIR.[I]	N-Term(TMTpro)	2	P41567	P41567; O60739	0	2	0.5862	0	1	1	1045.05	2089.09	2089.09	0.78	0.00082	CID (Collision Induced Dissociation)	MS2	0	15.9	73.52	71.3864	15216	201015L_YASAM07425_YAII63-13.raw	F4.9	4672.79	3586.08	4488.49	4748.52	3519.2	4759.29	3536.88	4446.07	1924.14	2806.39	4561.2	4681.81	4031.34	5090.28	3808.28	2847.74		3.77	1	FALSE	0.0001042	1.872e-05
High	Unambiguous	[R].eLAVQIYEEAR.[K]	N-Term(TMTpro)	2	O00571	O00571; O15523	0	2	0.481	0	1	1	812.948	1624.89	1624.89	0.96	0.00078	CID (Collision Induced Dissociation)	MS2	17.2828	14.7	44.407	71.3725	15211	201015L_YASAM07425_YAII63-13.raw	F4.9	3393	3573.07	4617.79	5300.38	2688.35	4357.84	4934.16	3595.66	1450.41	3122.09	3129.73	5929.86	3435.61	4581.43	3334.63	2753.74		3.95	1	FALSE	0.0001042	0.0002916
High	Unambiguous	[R].gDEELDSLIk.[A]	N-Term(TMTpro); K10(TMTpro)	2	Q71UI9	Q71UI9; P0C0S5	0	2	0.2797	0	1	1	863.99	1726.97	1726.97	0.21	0.00018	CID (Collision Induced Dissociation)	MS2	19.8591	27.7	40.804	71.3586	15207	201015L_YASAM07425_YAII63-13.raw	F4.9	6986.7	4663.27	10167.8	6800.04	5087.47	10875.5	10309.3	7666.98	2147.92	4724.16	7041.57	12551.3	7834.87	11110	3526.64	5353.26		3.11	1	FALSE	0.0001042	5.984e-05
High	Unambiguous	[K].gLSEDTTEETLkESFDGSVR.[A]	N-Term(TMTpro); K12(TMTpro)	1	P19338	P19338	1	3	0.4526	0	1	1	936.82	2808.44	2808.44	1.68	0.00157	CID (Collision Induced Dissociation)	MS2	6.8559	22.9	74.39	71.2191	15177	201015L_YASAM07425_YAII63-13.raw	F4.9	3227.36	5684.5	3671.65	5019.41	4069.05	3538.71	3963.55	3304.44	2145.63	2917.4	7941.93	4304.02	6222.66	5573.89	24331.5	3078.66		3.8	1	FALSE	0.0001042	1.931e-05
High	Unambiguous	[K].sDIDEIVLVGGSTR.[I]	N-Term(TMTpro)	1	P11021	P11021	0	2	0.5316	0	1	1	882.988	1764.97	1764.97	1.09	0.00096	CID (Collision Induced Dissociation)	MS2	37.6752	26.1	44.74	71.2042	15172	201015L_YASAM07425_YAII63-13.raw	F4.9	6436.06	4601.4	8219.37	6363.25	5722.26	9680.88	6700.65	5562	3281.94	4974.34	7957.12	7065.68	6752.02	8423.43	7067.8	4159.92		3.95	1	FALSE	0.0001042	1.351e-05
High	Unambiguous	[K].gDDLLPAGTEDYIHIR.[I]	N-Term(TMTpro)	2	P41567	P41567; O60739	0	3	0.5282	0	1	1	697.035	2089.09	2089.09	1.16	0.00081	CID (Collision Induced Dissociation)	MS2	11.1845	4.9	22.765	71.1713	15163	201015L_YASAM07425_YAII63-13.raw	F4.9	901.147	1078.95	1689.12	1613.22	895.614	935.429	1006.51	943.801		1769.4	1529.05	1711.84	1159.39	1180.39	1727	948.469		4.26	1	FALSE	0.0001042	1.459e-05
High	Unambiguous	[K].gLVEPVDVVDNADGTQTVNYVPSR.[E]	N-Term(TMTpro)	1	P21333	P21333	0	3	0.3475	0	1	1	950.161	2848.47	2848.46	1.23	0.00117	CID (Collision Induced Dissociation)	MS2	0	9.1	109.549	71.129	15151	201015L_YASAM07425_YAII63-13.raw	F4.9	2225.32	1869.23	2575.8	2897.82	1133.79	3125.69	2769.77	1705.13	871.098	1473.87	2784.43	2668.18	2019.27	2867	2449.6	2360.38		3.05	1	FALSE	0.0001042	0.000147
High	Unambiguous	[K].eVYEGEVTELTPcETENPMGGYGk.[T]	N-Term(TMTpro); C13(Carbamidomethyl); K24(TMTpro)	1	Q9Y265	Q9Y265	0	3	0.6945	0	1	1	1099.87	3297.58	3297.58	0.97	0.00107	CID (Collision Induced Dissociation)	MS2	0	5.7	119.5	71.1149	15147	201015L_YASAM07425_YAII63-13.raw	F4.9	1494.49	1562.79	1342.99	1780.52	1036.38	1647.41	1344.57	910.185	789.306	791.939	1470.92	2076.11	1914.12	2174.2	1254.8	1773.28		5.86	1	FALSE	0.0001042	1.379e-06
High	Unambiguous	[K].lTPEEEEILNk.[K]	N-Term(TMTpro); K11(TMTpro)	1	P62241	P62241	0	3	0.2871	0	1	1	641.703	1923.09	1923.09	0.36	0.00023	CID (Collision Induced Dissociation)	MS2	5.26082	4	30.18	71.1111	15145	201015L_YASAM07425_YAII63-13.raw	F4.9	1138.36	668.068	1236.82	1199.87	1349.23	1630.78	1228.61	1287.66		1122.13	772.094	1976.12	1534.17	1147.34	844.433	925.68		3.1	1	FALSE	0.0001042	3.534e-05
High	Unambiguous	[R].nPDDITQEEYGEFYk.[S]	N-Term(TMTpro); K15(TMTpro)	1	P08238	P08238	0	2	0.6874	0	1	1	1228.61	2456.21	2456.21	0.57	0.00069	CID (Collision Induced Dissociation)	MS2	0	5.8	119.5	71.0881	15138	201015L_YASAM07425_YAII63-13.raw	F4.9	1420.26	898.11	1761.42	1874.28	1447.95	2477.61	2174.38	1644.56			1382.89	2133.59	1942.18	2090.67	561.407	1318		5.31	1	FALSE	0.0001042	9.645e-07
High	Unambiguous	[K].lTPEEEEILNk.[K]	N-Term(TMTpro); K11(TMTpro)	1	P62241	P62241	0	2	0.4362	0	1	1	962.051	1923.09	1923.09	0.72	0.00069	CID (Collision Induced Dissociation)	MS2	14.379	28.3	99.659	71.005	15120	201015L_YASAM07425_YAII63-13.raw	F4.9	6502.42	6701.21	10469.4	8324.44	4167.24	10355.6	11098.4	5734.41	1924.01	4376.61	7917.93	9958.4	8154.04	9590.13	8771.34	5843.23		3.92	1	FALSE	0.0001042	3.634e-05
High	Unambiguous	[R].eEIIPVAAEYDk.[T]	N-Term(TMTpro); K12(TMTpro)	1	P11310	P11310	0	2	0.2013	0	1	1	993.059	1985.11	1985.11	0.62	0.00062	CID (Collision Induced Dissociation)	MS2	0	20.2	73.94	70.9496	15107	201015L_YASAM07425_YAII63-13.raw	F4.9	5306.04	3545.57	5950.91	4656.25	3685.37	7072.29	7757.48	4597.02	1834.52	4319.81	5349.73	6761.9	4841.74	7482.56	4412.68	3200.9		2.98	1	FALSE	0.0001042	0.0001537
High	Unambiguous	[R].aLPAVQQNNLDEDLIR.[K]	N-Term(TMTpro)	1	P22314	P22314	0	2	0.3741	0	1	1	1057.08	2113.16	2113.16	0.48	0.0005	CID (Collision Induced Dissociation)	MS2	0	9.9	119.5	70.9139	15099	201015L_YASAM07425_YAII63-13.raw	F4.9	2597.91	1405.19	2891.31	2521.51	1874.54	3230.61	2648.84	2177.93	1209.07	3352.24	2231.57	2878.29	3148.6	3190.02	2012.68	2359.14		4.01	1	FALSE	0.0001042	5.013e-06
High	Unambiguous	[R].gVVDSEDIPLNLSR.[E]	N-Term(TMTpro)	1	Q12931	Q12931	0	2	0	0	1	1	909.5	1817.99	1817.99	0.36	0.00032	CID (Collision Induced Dissociation)	MS2	29.5084	51.2	27.269	70.8751	15090	201015L_YASAM07425_YAII63-13.raw	F4.9	13449.4	11392.1	13190.5	14931.4	10958.7	13325.5	13131.9	13742	8967.6	14345.1	15376.5	13649.8	13154.7	14998.2	10320.8	12161.1		3.03	1	FALSE	0.0001042	4.314e-05
High	Unambiguous	[K].nNASTDYDLSDk.[S]	N-Term(TMTpro); K12(TMTpro)	1	P39023	P39023	0	3	0.2832	0	1	1	651.002	1950.99	1950.99	1.32	0.00086	CID (Collision Induced Dissociation)	MS2	22.9274	19.4	4.426	59.944	11428	201015L_YASAM07425_YAII63-13.raw	F4.9	28663.9	18167.4	30104	20447.8	19859.7	44561.7	35978.1	25857.2	5171.08	20545.9	29965.5	44496.4	32257.2	31060.6	25773.5	18570		2.79	1	FALSE	0.0001042	0.000162
High	Unambiguous	[R].aEEYEFLTPVEEAPk.[G]	N-Term(TMTpro); K15(TMTpro)	1	P52565	P52565	0	2	0.6513	0	1	1	1180.63	2360.25	2360.25	0.54	0.00063	CID (Collision Induced Dissociation)	MS2	8.21233	9.6	119.5	73.6129	15755	201015L_YASAM07425_YAII63-13.raw	F4.9	2235.75	1382.88	1963.31	3051.52	2676.54	2942.09	2840.75	2251.78	810.12	1557.4	2326.65	3071.04	2369.11	2937.39	2914.5	1364.55		4.56	1	FALSE	0.0001042	1.238e-05
High	Unambiguous	[R].dIDEVSSLLR.[T]	N-Term(TMTpro)	1	P50990	P50990	0	2	0.4145	0	1	1	725.908	1450.81	1450.81	0.63	0.00046	CID (Collision Induced Dissociation)	MS2	4.81334	8.2	70.784	73.8472	15804	201015L_YASAM07425_YAII63-13.raw	F4.9	1994.17	1915.3	2354.59	2992.99	1426.1	3279.48	2996.3	2743.9	619.006	1304.25	1932.14	2067.4	2435.21	2696.28	837.715	1434.24		2.75	1	FALSE	0.0001042	0.0001504
High	Unambiguous	[R].lAENSASSDDLLVAEVGISDYGDk.[L]	N-Term(TMTpro); K24(TMTpro)	1	P30040	P30040	0	3	0.5426	0	1	1	1026.2	3076.58	3076.58	0.08	8e-05	CID (Collision Induced Dissociation)	MS2	0	9	85.458	77.3463	16585	201015L_YASAM07425_YAII63-13.raw	F4.9	1097.06	2153.98	3183.75	2522.41	1307.09	3187.56	4035.14	2757.93		1293.31	2959.98	4370.64	1939.47	2462.87	2034.37	1164.28		5.51	1	FALSE	0.0001042	6.891e-09
High	Unambiguous	[R].aEDNADTLALVFEAPNQEk.[V]	N-Term(TMTpro); K19(TMTpro)	1	P12004	P12004	0	3	0.6121	0	1	1	895.141	2683.41	2683.41	0.72	0.00064	CID (Collision Induced Dissociation)	MS2	38.2018	15.3	79.551	77.3223	16579	201015L_YASAM07425_YAII63-13.raw	F4.9	3599.76	2815.81	3849.46	4244.7	2417.76	4950.8	5603.85	3985.1	741.049	3412.75	3875.68	5419.62	3988.63	6205.1	3132.68	2569.2		5.62	1	FALSE	0.0001042	2.942e-09
High	Unambiguous	[K].dIENQYETQITQIEHEVSSSGQEVQSSAk.[E]	N-Term(TMTpro); K29(TMTpro)	4	P35527	547748; 1890020; 1082558; P35527	0	3	0.6378	0	1	1	1291.65	3872.93	3872.93	-0.27	-0.00035	CID (Collision Induced Dissociation)	MS2	0	6.6	119.5	77.2371	16560	201015L_YASAM07425_YAII63-13.raw	F4.9	740.032	1045.66	2638.29	3129.27	1630.75	1252.26	1442.75	1725.88		1338.41	3168.27	3222.83	629.602	3233.75	1991.22	698.943		6.93	1	TRUE	0.0001042	1.058e-08
High	Unambiguous	[R].eGDVLTLLESER.[E]	N-Term(TMTpro)	1	P62857	P62857	0	2	0.4277	0	1	1	832.956	1664.91	1664.9	1.71	0.00142	CID (Collision Induced Dissociation)	MS2	9.12851	15.9	54.525	77.2253	16557	201015L_YASAM07425_YAII63-13.raw	F4.9	3876.32	3538.73	3794.5	4624.49	4343.66	5479.26	5172.96	3650.54	2430.24	3582.94	4604.49	5100.9	4235.09	5736.57	3608.77	3105.88		3.11	1	FALSE	0.0001042	4.963e-05
High	Unambiguous	[K].eEENASVIDSAELQAYPALVVEk.[M]	N-Term(TMTpro); K23(TMTpro)	1	P78527	P78527	0	3	0.504	0	1	1	1038.22	3112.66	3112.65	0.7	0.00072	CID (Collision Induced Dissociation)	MS2	31.1657	6.8	119.5	77.1985	16552	201015L_YASAM07425_YAII63-13.raw	F4.9	1756.07	1175.77	2173.11	1274.05	1478.42	1995.39	2410.51	1812.45	683.21	1169.3	1902.47	2022.79	2143.77	2320.34	2073.47	1404.98		4.94	1	FALSE	0.0001042	2.433e-06
High	Unambiguous	[R].tGDTGMLPANYVEAI.[-]	N-Term(TMTpro)	1	Q14847	Q14847	0	2	0.4793	0	1	1	928.475	1855.94	1855.94	0.24	0.00022	CID (Collision Induced Dissociation)	MS2	13.3505	8.9	67.833	77.1455	16542	201015L_YASAM07425_YAII63-13.raw	F4.9	2340.54	1669.03	2507.84	1743.48	1738.02	2884.65	2658.84	1844.83	1348.22	2300.58	2239.19	2307.93	2656.73	2051.3	2496.69	2105.16		3.38	1	FALSE	0.0001042	0.0002646
High	Unambiguous	[K].fWEVISDEHGIDPTGTYHGDSDLQLDR.[I]	N-Term(TMTpro)	1	P07437	P07437	0	4	0.2373	0	1	1	852.41	3406.62	3406.61	0.99	0.00084	CID (Collision Induced Dissociation)	MS2	7.389	9.3	43.041	77.4434	16608	201015L_YASAM07425_YAII63-13.raw	F4.9	1465.01	2045.16	2809.16	2917.08	1904.9	2928.54	2377.44	2145.54	609.764	2276.42	2838.15	2994.59	2890.91	3468.38	2382.11	1949.47		5.9	1	FALSE	0.0001042	4.345e-11
High	Unambiguous	[K].dGVADVSIEDSVISLSGDHcIIGR.[T]	N-Term(TMTpro); C20(Carbamidomethyl)	1	P00441	P00441	0	3	0.7007	0	1	1	940.146	2818.42	2818.42	1.12	0.00105	CID (Collision Induced Dissociation)	MS2	0	7.9	74.36	77.1299	16537	201015L_YASAM07425_YAII63-13.raw	F4.9	2380.7	1889.19	1872.58	2517.6	1381.63	2263.22	3230.54	1998.77		1943.03	1916.27	2121.63	1696.43	3261.61	1858.43	1341.67		6.85	1	FALSE	0.0001042	1.91e-08
High	Unambiguous	[K].lQPFATEADVEEALR.[L]	N-Term(TMTpro)	1	P33992	P33992	0	2	0.3503	0	1	1	997.031	1993.06	1993.06	-0.21	-0.00021	CID (Collision Induced Dissociation)	MS2	72.2556	10.6	73.91	76.7838	16459	201015L_YASAM07425_YAII63-13.raw	F4.9	2034.73	2896.54	2693.97	3062.51	2558.96	3587.08	2653.58	2349.79	1259.47	2667.36	2967.35	2648.97	2492.25	4133.34	2427.65	2014.07		3.74	1	FALSE	0.0001042	1.481e-05
High	Unambiguous	[K].eEEHDcFLEEIMTk.[R]	N-Term(TMTpro); C6(Carbamidomethyl); K14(TMTpro)	1	P12268	P12268	0	3	0.6125	0	1	1	806.733	2418.18	2418.18	0.98	0.00079	CID (Collision Induced Dissociation)	MS2	3.47087	16.2	119.5	76.7582	16452	201015L_YASAM07425_YAII63-13.raw	F4.9	3156.54	2027.78	4740.57	3555.24	3966.44	7560.44	6748	4586.54	1574.09	2474.19	2980.14	5979.06	3314.1	5186.54	3340.12	3362.12		3.69	1	FALSE	0.0001042	1.734e-05
High	Unambiguous	[R].sVDVILDDDLVDk.[A]	N-Term(TMTpro); K13(TMTpro)	1	P25205	P25205	0	2	0.47	0	1	1	1027.58	2054.15	2054.15	0.66	0.00068	CID (Collision Induced Dissociation)	MS2	0	17.5	109.431	76.6435	16430	201015L_YASAM07425_YAII63-13.raw	F4.9	3428.9	2967.9	5207.79	4839.01	3167.43	5880.94	6005.09	4539.71	714.213	3676.47	3753.02	7135.92	5673.1	6367.52	5295.3	1796.19		4.34	1	FALSE	0.0001042	1.403e-05
High	Unambiguous	[K].sTNGDTFLGGEDFDQALLR.[H]	N-Term(TMTpro)	1	P38646	P38646	0	3	0.564	0	1	1	787.394	2360.17	2360.17	-0.58	-0.00045	CID (Collision Induced Dissociation)	MS2	5.64961	6.4	45.505	76.5543	16410	201015L_YASAM07425_YAII63-13.raw	F4.9	1679.05	1797.78	1613.96	1733.51	1103.56	2151.34	1968.52	1342.97	575.607	1177.8	2342.54	1965.19	1447.02	1617.08	2122.26	1038.87		5.94	1	FALSE	0.0001042	6.847e-10
High	Unambiguous	[R].lVIASTLYEDGTLDDGEYNPTDDRPSR.[A]	N-Term(TMTpro)	1	P52434	P52434	0	3	0.6775	0	1	1	1106.21	3316.62	3316.61	1.28	0.00141	CID (Collision Induced Dissociation)	MS2	0	11.5	103.831	76.4636	16391	201015L_YASAM07425_YAII63-13.raw	F4.9	2974.13	2424.3	2715.05	3599.35	2100.05	3554.99	3233.92	2079.79	1175.2	2850.41	3264.28	3704.86	3424.68	3030.52	1784.42	2433.47		5.83	1	FALSE	0.0001042	3.629e-08
High	Unambiguous	[K].sTNGDTFLGGEDFDQALLR.[H]	N-Term(TMTpro)	1	P38646	P38646	0	2	0.4789	0	1	1	1180.59	2360.17	2360.17	0.96	0.00113	CID (Collision Induced Dissociation)	MS2	7.6212	5.6	119.5	76.3828	16373	201015L_YASAM07425_YAII63-13.raw	F4.9	927.441	1251.23	1703.58	1456.45	1443.92	1175.32	802.889	982.116	723.453	1407.75	1725.15	1450.33	1821.69	2221.16	2035.73	1626.25		4.97	1	FALSE	0.0001042	1.091e-07
High	Unambiguous	[R].dSLLQDGEFSMDLR.[T]	N-Term(TMTpro)	1	P07737	P07737	0	2	0.5538	0	1	1	965.482	1929.96	1929.95	0.53	0.00051	CID (Collision Induced Dissociation)	MS2	12.5335	13.7	119.5	76.8144	16467	201015L_YASAM07425_YAII63-13.raw	F4.9	3112.92	2792.76	4416.77	4029.34	3020.79	5047.02	3509.82	3797.45	1268.7	2735.73	4118.11	4556.33	3730.44	3615.71	3197.42	3285.97		4.37	1	FALSE	0.0001042	2.994e-06
High	Unambiguous	[R].lAENSASSDDLLVAEVGISDYGDk.[L]	N-Term(TMTpro); K24(TMTpro)	1	P30040	P30040	0	3	0.5808	0	1	1	1026.2	3076.58	3076.58	0.55	0.00057	CID (Collision Induced Dissociation)	MS2	2.64683	18.2	67.046	77.4988	16620	201015L_YASAM07425_YAII63-13.raw	F4.9	3402.64	3409.85	5068.35	5733.85	3469.01	7086.32	7410.04	3633.65	811.475	3488.98	5159.74	7422.25	3869.48	6164.29	3391.5	2400.49		5.82	1	FALSE	0.0001042	3.993e-07
High	Unambiguous	[R].tPAVEGLTEAEEEELRAELTk.[V]	N-Term(TMTpro); K21(TMTpro)	1	O43399	O43399	1	3	0.6074	0	1	1	975.197	2923.58	2923.58	-0.05	-5e-05	CID (Collision Induced Dissociation)	MS2	7.79933	27.1	105.272	77.6038	16640	201015L_YASAM07425_YAII63-13.raw	F4.9	5758.39	6352.1	5782	6571.04	4579.76	7106.19	10646.5	6554.8	1648.74	5931.03	7847.05	7178.24	7921.61	8999.87	11688	4696.44		5.4	1	FALSE	0.0001042	3.227e-06
High	Unambiguous	[KR].vDLNEEETILIIR.[R]	N-Term(TMTpro)	2	P51532; P51531	P51532; P51531	0	2	0.3186	0	1	1	931.034	1861.06	1861.06	0.1	0.0001	CID (Collision Induced Dissociation)	MS2	24.8938	14.4	119.5	77.7302	16667	201015L_YASAM07425_YAII63-13.raw	F4.9	4384.93	3432.2	3856.9	4229.82	2817.59	3679.5	4765.21	3071.52	1146.59	2557.27	4941.21	4375.24	4460.62	5286.11	4501.02	2312.52		2.95	2	FALSE	0.0001042	1.049e-05
High	Unambiguous	[R].iEIESFYEGEDFSETLTR.[A]	N-Term(TMTpro)	1	P11021	P11021	0	3	0.7288	0	1	1	823.738	2469.2	2469.2	0.5	0.00041	CID (Collision Induced Dissociation)	MS2	2.55286	7	57.503	79.4325	17003	201015L_YASAM07425_YAII63-13.raw	F4.9	2207.03	1663.19	1988.04	1806.95	1056.65	1528.09	1707.98	1604.03	871.367	1489.45	1691.13	2400.76	1809.1	2836.99	1835.93	1296.31		5.42	1	FALSE	0.0001042	2.128e-06
High	Unambiguous	[R].dYLDFLDDEEDQGIYQSk.[V]	N-Term(TMTpro); K18(TMTpro)	1	P25205	P25205	0	2	0.7938	0	1	1	1401.19	2801.36	2801.36	-0.56	-0.00079	CID (Collision Induced Dissociation)	MS2	0	3.7	119.5	79.3166	16979	201015L_YASAM07425_YAII63-13.raw	F4.9	934.099		1469.84	799.814	854.558	1415.85	1444.25	1108.79			1457.25	1392.92	1199.05	1107.3	573.98	545.628		6.11	1	FALSE	0.0001042	1.62e-07
High	Unambiguous	[R].iEIESFYEGEDFSETLTR.[A]	N-Term(TMTpro)	1	P11021	P11021	0	2	0.7135	0	1	1	1235.1	2469.19	2469.2	-1.86	-0.0023	CID (Collision Induced Dissociation)	MS2	66.3575	3.3	119.5	79.1548	16947	201015L_YASAM07425_YAII63-13.raw	F4.9	674.969	1344.89	1186.62	1203.75	519.417	1527.32	821.494	656.474		925.802	1092.49	702.734	1135.18	690.174	768.112			5.76	1	FALSE	0.0001042	4.144e-07
High	Unambiguous	[K].lDEIYVAGLVAHSDLDER.[A]	N-Term(TMTpro)	1	O60506	O60506	0	3	0.7398	0	1	1	773.745	2319.22	2319.22	2.2	0.0017	CID (Collision Induced Dissociation)	MS2	3.50315	5.2	69.273	79.0666	16930	201015L_YASAM07425_YAII63-13.raw	F4.9	1593.96	965.984	1203.64	1089.26	1755.7	1224.29	1916.35	1021.89		784.381	2211.36	2199.6	1282.85	1880.39	995.953	654.416		5.38	1	FALSE	0.0001042	3.933e-08
High	Unambiguous	[R].dYLDFLDDEEDQGIYQSk.[V]	N-Term(TMTpro); K18(TMTpro)	1	P25205	P25205	0	3	0.6645	0	1	1	934.461	2801.37	2801.36	1.66	0.00155	CID (Collision Induced Dissociation)	MS2	19.7484	16.2	50.729	79.0427	16925	201015L_YASAM07425_YAII63-13.raw	F4.9	4310.46	2732.55	5424.74	4189.98	2374.7	7575.71	5580.7	4570.56	794.348	2082.83	4460.94	6977.89	3552.48	7064.15	2075.48	2511.19		4.59	1	FALSE	0.0001042	5.78e-06
High	Unambiguous	[K].dFPEYTFAIADEEDYAGEVk.[D]	N-Term(TMTpro); K20(TMTpro)	1	P13667	P13667	0	3	0.5088	0	1	1	973.148	2917.43	2917.43	0.55	0.00054	CID (Collision Induced Dissociation)	MS2	0	10.1	84.631	78.9727	16912	201015L_YASAM07425_YAII63-13.raw	F4.9	2137.07	1593.17	2541.52	2847.11	1337.7	4271.6	4192.37	2380.86	1086.71	1938.1	2581.05	2825.7	2857.27	2657.56	2883.5	1846.23		5.11	1	FALSE	0.0001042	4.353e-07
High	Unambiguous	[K].gDEEGVPAVVIDMSGLR.[E]	N-Term(TMTpro)	1	P13796	P13796	0	2	0.6475	0	1	1	1024.54	2048.07	2048.07	0.91	0.00093	CID (Collision Induced Dissociation)	MS2	0.979384	44.6	36.826	78.8729	16894	201015L_YASAM07425_YAII63-13.raw	F4.9	9919.08	10911.4	13212.3	10547.9	10669.1	13509.2	10938.8	9692.43	4558.74	9375.36	12199.9	12996.6	10887.9	13621.2	12646.3	10076.1		4.17	1	FALSE	0.0001042	2.15e-07
High	Unambiguous	[K].dSYLILETLPTEYDSR.[V]	N-Term(TMTpro)	1	P17980	P17980	0	2	0.5742	0	1	1	1110.07	2219.14	2219.14	-0.14	-0.00016	CID (Collision Induced Dissociation)	MS2	0	6.7	119.5	78.7024	16864	201015L_YASAM07425_YAII63-13.raw	F4.9	1782.2	920.68	1906.07	1483.54	1245.61	2508.08	2249.54	1777.29		2092.95	2048.43	1992.21	1822.55	1846.08	2118.41	1380.87		5.12	1	FALSE	0.0001042	2.165e-06
High	Unambiguous	[R].fLNEHPGGEEVLLEQAGVDASESFEDVGHSSDAR.[E]	N-Term(TMTpro)	1	O43169	O43169	0	4	0.7602	0	1	1	983.721	3931.86	3931.85	2.11	0.00208	CID (Collision Induced Dissociation)	MS2	29.3296	10.2	46.023	78.6665	16856	201015L_YASAM07425_YAII63-13.raw	F4.9	2611.38	1796.61	3207.21	2957.7	2893.59	2811.16	2901.99	1455.17	1082.7	2460.06	3276.72	3438.71	2556.37	2719.86	3134.92	1965.42		7.34	1	FALSE	0.0001042	8.723e-10
High	Unambiguous	[R].sEPTQALELTEDDIkEDGIVPLR.[Y]	N-Term(TMTpro); K15(TMTpro)	1	O43396	O43396	1	3	0.5705	0	1	1	1059.58	3176.72	3176.72	0.28	0.00029	CID (Collision Induced Dissociation)	MS2	0	12.3	119.5	78.61	16845	201015L_YASAM07425_YAII63-13.raw	F4.9	2581.88	1635.27	3816.52	3301.73	2434.06	2718.92	4711.99	3100.07	742.077	1989.37	4294.26	5678.04	3435.8	3963.56	2451.72	2425.24		4.61	1	FALSE	0.0001042	3.086e-07
High	Unambiguous	[K].gDEEGVPAVVIDMSGLR.[E]	N-Term(TMTpro)	1	P13796	P13796	0	2	0.4977	0	1	1	1024.54	2048.07	2048.07	1.03	0.00106	CID (Collision Induced Dissociation)	MS2	5.94994	15.7	119.5	78.3638	16801	201015L_YASAM07425_YAII63-13.raw	F4.9	3997.88	4505.48	4619.93	3269.85	4237.4	5157.79	4323.43	3099.55	2065.14	3791.99	4035.08	4665.88	5124.83	4814.4	3647.23	3639.72		4.36	1	FALSE	0.0001042	7.012e-06
High	Unambiguous	[K].mFVLDEADEMLSR.[G]	N-Term(TMTpro); M1(Oxidation)	2	P60842; Q14240	P60842; Q14240	0	2	0.3467	0	1	1	938.465	1875.92	1875.92	3.87	0.00363	CID (Collision Induced Dissociation)	MS2	0	13.3	74.39	78.2337	16774	201015L_YASAM07425_YAII63-13.raw	F4.9	3142.41	3100.13	3576.03	2620.6	3367.07	4291.6	3608.19	3206.62	1352.02	3507.92	3708.51	4145.61	4029.57	2881.7	3704.72	2935.94		2.74	2	FALSE	0.0001042	0.0002902
High	Unambiguous	[K].dTNGENIAESLVAEGLATR.[R]	N-Term(TMTpro)	1	Q7KZF4	Q7KZF4	0	2	0.5175	0	1	1	1132.59	2264.17	2264.17	0.67	0.00076	CID (Collision Induced Dissociation)	MS2	32.0427	5.6	119.5	78.0994	16745	201015L_YASAM07425_YAII63-13.raw	F4.9	1337.97	987.039	1684.2	1843.39	1419.24	1918.39	1011.54	1489.76		1195.05	2022.87	1783.93	1465.27	2048.15	1121.81	668.908		5.43	1	FALSE	0.0001042	1.672e-07
High	Unambiguous	[R].fEIGEGENLDLPYGLER.[A]	N-Term(TMTpro)	1	Q02790	Q02790	0	2	0.4237	0	1	1	1128.08	2255.15	2255.15	1.16	0.0013	CID (Collision Induced Dissociation)	MS2	13.4848	6.4	119.5	77.8492	16692	201015L_YASAM07425_YAII63-13.raw	F4.9	1865.08	1162.51	1443.77	1732.99	1683.14	2404.23	2157.24	972.512	1120.18	1487.29	1803.39	2240.5	1258.21	1466.88	2005.99	1965.95		4.13	1	FALSE	0.0001042	0.0001393
High	Unambiguous	[K].eVTWEVLEGEVEk.[E]	N-Term(TMTpro); K13(TMTpro)	1	P05455	P05455	0	2	0.5104	0	1	1	1078.09	2155.18	2155.18	0.55	0.00059	CID (Collision Induced Dissociation)	MS2	30.2811	18	119.5	77.7422	16670	201015L_YASAM07425_YAII63-13.raw	F4.9	3845.04	3201.25	5500.98	4372.17	3748.25	6035.71	7409.16	3874.41	890.68	3104.13	5429.7	5764.31	3882.23	8251.5	3879.06	3155.62		5.31	1	FALSE	0.0001042	2.466e-06
High	Unambiguous	[R].dLGEELEALk.[T]	N-Term(TMTpro); K10(TMTpro)	2	P35579	P35749; P35579	0	2	0.2545	0	1	1	863.001	1724.99	1724.99	1	0.00086	CID (Collision Induced Dissociation)	MS2	21.4165	21.7	64.842	76.321	16361	201015L_YASAM07425_YAII63-13.raw	F4.9	3996.73	3445.62	7837.74	5351.6	3144.93	9869.86	8068.88	5670.57	1307.45	3483.8	5981.21	9335.08	5666.73	8759	3393.5	4514.93		3.3	1	FALSE	0.0001042	0.0001646
High	Unambiguous	[K].vLDNYLTSPLPEEVDETSAEDEGVSQR.[K]	N-Term(TMTpro)	1	O00299	O00299	0	3	0.6596	0	1	1	1099.54	3296.6	3296.6	1.38	0.00152	CID (Collision Induced Dissociation)	MS2	9.77169	5.6	119.5	76.249	16346	201015L_YASAM07425_YAII63-13.raw	F4.9	2071.41	1319.79	1515.76	2127.33	1191.36	1615.4	2302.17	1206.81	791.074	739.603	1909.72	1335.69	1466.54	880.917	1918.73			5.7	1	FALSE	0.0001042	8.593e-08
High	Unambiguous	[R].yVQLPADEVDTQLLQDAAR.[K]	N-Term(TMTpro)	1	Q9Y333	Q9Y333	0	3	0.597	0	1	1	817.102	2449.29	2449.29	1.28	0.00104	CID (Collision Induced Dissociation)	MS2	12.1981	7.7	47.299	76.1543	16324	201015L_YASAM07425_YAII63-13.raw	F4.9	2285.68	1323.75	2827.14	1316.66	1751.81	1513.28	1995.07	1252.87	1728.46	2176.28	1971.05	1989.09	2381.24	2387.84	2038.66	2082.41		7.27	1	FALSE	0.0001042	4.352e-08
High	Unambiguous	[R].tPLSEAEFEEIMNR.[N]	N-Term(TMTpro)	1	Q16630	Q16630	0	2	0.4124	0	1	1	985.497	1969.99	1969.99	0.56	0.00055	CID (Collision Induced Dissociation)	MS2	53.9743	14.7	119.5	76.1169	16316	201015L_YASAM07425_YAII63-13.raw	F4.9	3410.81	4097.57	3681.83	3917.98	3288.12	3691.67	4036.05	3746.42	1732.25	3614.46	3883.5	4341.04	4415.59	3676.48	4904.42	3491.5		3.71	1	FALSE	0.0001042	8.527e-06
High	Unambiguous	[K].ePAcDDPDTEQAALAAVDYINk.[H]	N-Term(TMTpro); C4(Carbamidomethyl); K22(TMTpro)	1	P12763	P12763	0	2	0.7475	0	1	1	1507.75	3014.49	3014.49	0.05	8e-05	CID (Collision Induced Dissociation)	MS2	0	6.9	69.68	74.7547	16024	201015L_YASAM07425_YAII63-13.raw	F4.9	1611.98	1007.7	3291.22	1469.84	2310.96	2460.73	2234.17	2457.39		1494.29	1987.39	2960.41	2076.19	2435.66		565.251		6.1	1	TRUE	0.0001042	2.839e-06
High	Unambiguous	[K].dELHIVEAEAMNYEGSPIk.[V]	N-Term(TMTpro); K19(TMTpro)	1	P06748	P06748	0	3	0.5756	0	1	1	918.482	2753.43	2753.43	0.17	0.00015	CID (Collision Induced Dissociation)	MS2	10.6642	19.6	63.93	74.6392	15992	201015L_YASAM07425_YAII63-13.raw	F4.9	4075.44	4897.76	5031.31	4698.75	3829.85	7849.72	6917.18	4814.3	1466.05	4200.95	4979.59	6913.83	4373.49	6239.7	5838.36	2795.35		5.42	1	FALSE	0.0001042	2.814e-09
High	Unambiguous	[R].sINDPEHPLTLEELNVVEQVR.[V]	N-Term(TMTpro)	1	Q9Y3D0	Q9Y3D0	0	3	0.4921	0	1	1	912.489	2735.45	2735.45	-0.23	-0.00021	CID (Collision Induced Dissociation)	MS2	64.9103	18.6	53.146	74.5722	15976	201015L_YASAM07425_YAII63-13.raw	F4.9	5436.49	3757.46	5339.72	5111.44	4273.18	4595.73	4560.37	4717.18	1955.85	3598	6387.25	5277.02	3871.63	5172.1	4602.67	4054.6		3.78	1	FALSE	0.0001042	4.444e-07
High	Unambiguous	[K].iAQLEEQLDNETk.[E]	N-Term(TMTpro); K13(TMTpro)	1	P35579	P35579	0	2	0.6323	0	1	1	1070.09	2139.18	2139.18	0.63	0.00067	CID (Collision Induced Dissociation)	MS2	29.7811	19.6	119.5	74.5115	15960	201015L_YASAM07425_YAII63-13.raw	F4.9	4034.59	3375.29	5966.76	4641.83	4309.33	8351.75	6066.51	4755.68	1739.2	3861.39	4654.16	6598.63	4525.7	7148.85	3727.3	3529.32		5.14	1	FALSE	0.0001042	3.631e-06
High	Unambiguous	[K].yQEEFEHFQQELDk.[K]	N-Term(TMTpro); K14(TMTpro)	1	P49257	P49257	0	3	0.5752	0	1	1	826.754	2478.25	2478.24	1.64	0.00136	CID (Collision Induced Dissociation)	MS2	6.8113	19	35.272	74.4796	15951	201015L_YASAM07425_YAII63-13.raw	F4.9	3836.99	3496.98	6412.9	4809.8	3327.3	6603.15	6433.96	3488.02	1252.98	3483.2	4488.68	6014.7	4114.88	6871.54	4938.31	2956.62		5.32	1	FALSE	0.0001042	2.528e-05
High	Unambiguous	[K].iAQLEEQLDNETk.[E]	N-Term(TMTpro); K13(TMTpro)	1	P35579	P35579	0	3	0.6211	0	1	1	713.733	2139.18	2139.18	2.65	0.00189	CID (Collision Induced Dissociation)	MS2	0	7.1	38.036	74.4205	15937	201015L_YASAM07425_YAII63-13.raw	F4.9	1870.86	959.209	2163.69	1767.55	1454.43	2739.81	2551.44	1873.23		1794.39	813.721	3566.72	1711.84	2699.46	1343.4	1274.1		4.54	1	FALSE	0.0001042	1.407e-07
High	Unambiguous	[K].dGDSVMVLPTIPEEEAk.[K]	N-Term(TMTpro); K17(TMTpro)	1	P30041	P30041	0	2	0.546	0	1	1	1219.65	2438.3	2438.3	-0.45	-0.00054	CID (Collision Induced Dissociation)	MS2	0	3	72.05	74.3912	15929	201015L_YASAM07425_YAII63-13.raw	F4.9	692.739		576.835	484.015		1239.36	1505	1004.35			587.479	1196.25	1789.35	1275.92	872.506	690.486		5.22	1	FALSE	0.0001042	1.674e-06
High	Unambiguous	[K].sPQPPVEEEDEHFDDTVVcLDTYNcDLHFk.[I]	N-Term(TMTpro); C19(Carbamidomethyl); C25(Carbamidomethyl); K30(TMTpro)	1	Q00839	Q00839	0	4	0.6682	0	1	1	1061.75	4243.97	4243.97	-0.96	-0.00102	CID (Collision Induced Dissociation)	MS2	15.7777	13.4	119.5	74.2809	15904	201015L_YASAM07425_YAII63-13.raw	F4.9	3254.2	2119.22	4554.82	2353.21	3538.53	4204.73	4916.66	3438.1	1105.41	3122.36	3147.62	4936.13	2923.01	4223.08	3987.71	2486.51		6.33	1	FALSE	0.0001042	1.711e-05
High	Unambiguous	[K].nAVEEYVYEFR.[D]	N-Term(TMTpro)	1	Q92598	Q92598	0	2	0.569	0	1	1	861.937	1722.87	1722.87	0.04	4e-05	CID (Collision Induced Dissociation)	MS2	13.5103	19.8	69.588	74.1847	15881	201015L_YASAM07425_YAII63-13.raw	F4.9	4937.73	3700.53	6513.59	4789.97	4762.66	7209.48	6068.01	4625.85	1878.17	4837.65	5025.1	5626.84	4637.25	6800.21	5670.86	4243.08		4.13	1	FALSE	0.0001042	0.0001772
High	Unambiguous	[R].gQFSTDELVAEVEk.[R]	N-Term(TMTpro); K14(TMTpro)	2	Q00610	Q00610; P53675	0	2	0.3974	0	1	1	1080.59	2160.17	2160.17	0.58	0.00063	CID (Collision Induced Dissociation)	MS2	33.2749	11.5	119.5	74.0679	15856	201015L_YASAM07425_YAII63-13.raw	F4.9	2427.42	2625.19	3575.98	2514.55	2960.35	4928.88	3985.17	3245.81	816.177	2189.36	3715.66	3794.04	2511.22	4599.17	3494.93	2164.51		4.63	1	FALSE	0.0001042	1.535e-06
High	Unambiguous	[K].wNTDNTLGTEITVEDQLAR.[G]	N-Term(TMTpro)	1	P21796	P21796	0	2	0.6538	0	1	1	1240.63	2480.26	2480.26	-1.37	-0.0017	CID (Collision Induced Dissociation)	MS2	0	4.6	119.5	74.0373	15849	201015L_YASAM07425_YAII63-13.raw	F4.9	1492.4	991.123	1574.71	751.748	1477.22	1397.86	1622.72	1467.53		1399.36	696.528	1125.85	629.817	1729.16	831.5	754.211		6.47	1	FALSE	0.0001042	9.892e-07
High	Unambiguous	[K].sVVGHDVSVSVETQGDDWDTDPDFVNDISEk.[E]	N-Term(TMTpro); K31(TMTpro)	1	P14317	P14317	0	3	0.7524	0	1	1	1333.98	3999.92	3999.92	-1.17	-0.00156	CID (Collision Induced Dissociation)	MS2	7.0782	2.7	71.12	73.9998	15842	201015L_YASAM07425_YAII63-13.raw	F4.9	1117.74		1146.84	596.321		1353.91	742.727	993.605		503.65	1170.04	1379.81	726.044	582.485	731.935			7.31	1	FALSE	0.0001042	8.231e-11
High	Unambiguous	[R].vENQENVSNLVIEDTELk.[Q]	N-Term(TMTpro); K18(TMTpro)	1	Q01518	Q01518	0	2	0.5763	0	1	1	1341.23	2681.45	2681.45	1.68	0.00225	CID (Collision Induced Dissociation)	MS2	0	6.2	119.5	73.9779	15836	201015L_YASAM07425_YAII63-13.raw	F4.9	1418.16	851.56	1826.27	1658.49	1458.45	3269.78	2461.67	1817.69		612.893	1106.4	2232.88	1491.71	2716.67	830.137	742.628		5.83	1	FALSE	0.0001042	8.253e-07
High	Unambiguous	[K].dNALLSAIEESR.[K]	N-Term(TMTpro)	1	Q8N1F7	Q8N1F7	0	2	0.489	0	1	1	811.44	1621.87	1621.87	1.2	0.00098	CID (Collision Induced Dissociation)	MS2	10.9215	11.9	53.494	73.9366	15827	201015L_YASAM07425_YAII63-13.raw	F4.9	2227.32	2475.4	3430.81	2753.85	2165.3	4150.33	3082.25	2387.57	1763.3	2792.84	3099.4	4392.64	2594.87	4344.48	2185.67	2493.55		4.54	1	FALSE	0.0001042	4.937e-05
High	Unambiguous	[R].vENQENVSNLVIEDTELk.[Q]	N-Term(TMTpro); K18(TMTpro)	1	Q01518	Q01518	0	3	0.5291	0	1	1	894.488	2681.45	2681.45	0.72	0.00064	CID (Collision Induced Dissociation)	MS2	4.05423	16	47.043	73.9345	15826	201015L_YASAM07425_YAII63-13.raw	F4.9	4351.08	2962.13	4461.69	3040.64	3548.23	6753.49	6634.11	3517.16	964.708	3039.64	3746.83	4962.41	4640.29	5844.36	3201.96	1803.36		5.33	1	FALSE	0.0001042	0.000297
High	Unambiguous	[R].aVYDEQGTVDEDSPVLTQDRDWEAYWR.[L]	N-Term(TMTpro)	1	Q8WXX5	Q8WXX5	1	3	0.6966	0	1	1	1183.22	3547.66	3547.66	0.46	0.00054	CID (Collision Induced Dissociation)	MS2	0	7.8	119.5	74.8012	16035	201015L_YASAM07425_YAII63-13.raw	F4.9	2312.45	1805.72	1666.64	1963.22	1245.93	2948.05	2050.4	1412.75	671.21	2371.19	1697.82	2079.94	1813.09	2558.04	1778.94	1716		5.57	1	FALSE	0.0001042	7.274e-06
High	Unambiguous	[K].sSSPAPADIAQTVQEDLR.[T]	N-Term(TMTpro)	1	Q13283	Q13283	0	2	0.6415	0	1	1	1095.07	2189.14	2189.14	-0.73	-0.0008	CID (Collision Induced Dissociation)	MS2	75.3966	6.7	119.5	73.646	15763	201015L_YASAM07425_YAII63-13.raw	F4.9	1394.2	1527.09	1810.03	1797.61	1374.24	1706.81	2313.06	931.33	602.793	1849.51	1829.47	2456.33	2309.4	1969.99	1794.52	1009.63		4.77	1	FALSE	0.0001042	3.643e-08
High	Unambiguous	[K].dELHIVEAEAMNYEGSPIk.[V]	N-Term(TMTpro); K19(TMTpro)	1	P06748	P06748	0	4	0.6607	0	1	1	689.114	2753.43	2753.43	1.38	0.00095	CID (Collision Induced Dissociation)	MS2	0	4.5	46.138	74.9008	16059	201015L_YASAM07425_YAII63-13.raw	F4.9	1284.72	764.38	1804.49	1020.83	1001.9	1668.27	2178.03	756.692	515.83	782.389	1211.7	1481.99	1096.9	900.661	965.444			4.48	1	FALSE	0.0001042	4.384e-11
High	Unambiguous	[R].dGWQVEEADDWLR.[Y]	N-Term(TMTpro)	1	P06737	P06737	0	2	0.6193	0	1	1	961.964	1922.92	1922.92	0.49	0.00047	CID (Collision Induced Dissociation)	MS2	19.0988	13.6	70.397	74.9667	16076	201015L_YASAM07425_YAII63-13.raw	F4.9	3149.43	2177.59	4655.21	3316.07	2968.8	3832	4814.64	4562.68	1677.82	2680.84	4163.37	4424.34	3270.03	4576.55	3191.52	3584.87		4.15	1	FALSE	0.0001042	1.739e-05
High	Unambiguous	[R].eVDPLVYNMSHEDPGNVSYSEIGGLSEQIR.[E]	N-Term(TMTpro)	1	P62333	P62333	0	3	0.5635	0	1	1	1213.59	3638.75	3638.76	-1.58	-0.00192	CID (Collision Induced Dissociation)	MS2	0	2	119.5	76.0431	16300	201015L_YASAM07425_YAII63-13.raw	F4.9	637.195	482.763	558.797	524.819		765.689	951.933			699.818	917.869	884.038	561.823	1015.32				4.88	1	FALSE	0.0001042	2.01e-07
High	Unambiguous	[R].yVQLPADEVDTQLLQDAAR.[K]	N-Term(TMTpro)	1	Q9Y333	Q9Y333	0	2	0.5024	0	1	1	1225.15	2449.29	2449.29	-0.21	-0.00026	CID (Collision Induced Dissociation)	MS2	0	4.2	72.02	76.0247	16296	201015L_YASAM07425_YAII63-13.raw	F4.9	767.479	1117.18	1645.78	636.097	753.55	734.292	1267.77	1024.83	602.194	1069.58	1476.5	1323.24	1173.37	1020.19	1072.02	728.578		4.18	1	FALSE	0.0001042	5.712e-05
High	Unambiguous	[R].eEFASTcPDDEEIELAYEQVAk.[A]	N-Term(TMTpro); C7(Carbamidomethyl); K22(TMTpro)	1	O00299	O00299	0	3	0.6122	0	1	1	1061.18	3181.54	3181.54	-0.4	-0.00042	CID (Collision Induced Dissociation)	MS2	5.08546	12.4	119.5	76.0207	16295	201015L_YASAM07425_YAII63-13.raw	F4.9	2354.99	1607.44	4550.38	3244.83	2328.85	3998.71	4537.6	3721.13	771.024	2245.91	2808.74	4467.74	2792.49	4025.32	2634.44	2187.14		5.39	1	FALSE	0.0001042	1.937e-05
High	Unambiguous	[R].tPLSEAEFEEIMNR.[N]	N-Term(TMTpro)	1	Q16630	Q16630	0	2	0.5164	0	1	1	985.495	1969.98	1969.99	-1.24	-0.00122	CID (Collision Induced Dissociation)	MS2	16.3731	14.3	119.5	75.9827	16286	201015L_YASAM07425_YAII63-13.raw	F4.9	2903.04	3018.7	3307.41	4703.69	3413.62	4937.54	5491.53	3341.63	1729.86	3440.37	4330.76	3994.83	2901.98	3292.65	3585.17	2763.78		3.66	1	FALSE	0.0001042	4.617e-05
High	Unambiguous	[K].vVIEDEQLVLGASQEPVGR.[W]	N-Term(TMTpro)	1	Q6IBS0	Q6IBS0	0	3	0.4861	0	1	1	781.435	2342.29	2342.29	1	0.00078	CID (Collision Induced Dissociation)	MS2	8.27823	3.4	44.348	75.5795	16207	201015L_YASAM07425_YAII63-13.raw	F4.9	806.751	922.126		1297.51	702.726	1009.55	894.483	590.807		869.578	1325.31	1098.63	672.756	1280.08	1348.81	1142.24		4.32	1	FALSE	0.0001042	6.723e-06
High	Unambiguous	[K].eIDLLLGQTDDTR.[Y]	N-Term(TMTpro)	1	O75643	O75643	0	2	0.4521	0	1	1	896.985	1792.96	1792.96	0.78	0.0007	CID (Collision Induced Dissociation)	MS2	34.9637	14.1	45.441	75.5686	16204	201015L_YASAM07425_YAII63-13.raw	F4.9	3174.99	3771.95	3416.77	5103.88	2877.25	4459.9	4043.12	3585.52	1411.06	2706.91	3945.04	4725.36	3016.2	3704.08	2954.95	2429.98		3.76	1	FALSE	0.0001042	6.38e-05
High	Unambiguous	[K].eVEELILTESk.[K]	N-Term(TMTpro); K11(TMTpro)	1	Q9BZZ5	Q9BZZ5	0	2	0.4909	0	1	1	949.553	1898.1	1898.1	0.02	2e-05	CID (Collision Induced Dissociation)	MS2	10.7678	16	74.3	75.536	16195	201015L_YASAM07425_YAII63-13.raw	F4.9	3080.53	2791.2	4524.65	3859.53	3076.31	5872.94	5108.75	4572.13	1608.41	2429.26	4371.69	5553.36	4676.16	5050.66	4985.41	2947.96		3.85	1	FALSE	0.0001042	2.181e-05
High	Unambiguous	[R].dSLLQDGEFSMDLR.[T]	N-Term(TMTpro)	1	P07737	P07737	0	2	0.6135	0	1	1	965.481	1929.95	1929.95	0.15	0.00015	CID (Collision Induced Dissociation)	MS2	0.673554	93.9	15.396	75.4124	16167	201015L_YASAM07425_YAII63-13.raw	F4.9	22220.1	16874.1	26721.3	22756.1	21551.8	29005.2	31297	24709.9	8569.63	19566.2	28637.4	31266.8	23909.8	29126.6	21287.3	17376.6		4.45	1	FALSE	0.0001042	6.541e-05
High	Unambiguous	[R].tVESEAASYLDQISR.[Y]	N-Term(TMTpro)	1	P61289	P61289	0	2	0.463	0	1	1	987.011	1973.02	1973.01	0.33	0.00032	CID (Collision Induced Dissociation)	MS2	63.5587	20.2	73.069	75.3881	16161	201015L_YASAM07425_YAII63-13.raw	F4.9	4150.78	4431.15	4502.73	5108.99	3969.04	6537.93	5569.92	4301.47	2483.91	3729.76	5986.77	6179.9	4004.78	6635.84	4793.05	4334.53		4.19	1	FALSE	0.0001042	1.282e-05
High	Unambiguous	[K].qVELALWDTAGQEDYDR.[L]	N-Term(TMTpro)	3	P61586	P08134; P62745; P61586	0	2	0.5902	0	1	1	1157.07	2313.13	2313.13	-0.18	-0.00021	CID (Collision Induced Dissociation)	MS2	0	6.6	119.5	75.3637	16155	201015L_YASAM07425_YAII63-13.raw	F4.9	1956.93	2065.78	1102.07	1866.75	1350.46	2029.01	1973.74	1791.37	1334.94	1843.15	1928.94	1054.78	1476.34	1237.82	1871.35	761.624		5.49	1	FALSE	0.0001042	1.603e-07
High	Unambiguous	[R].dSLLQDGEFSMDLR.[T]	N-Term(TMTpro)	1	P07737	P07737	0	3	0.6234	0	1	1	643.99	1929.96	1929.95	0.75	0.00048	CID (Collision Induced Dissociation)	MS2	0	0.8	75.438	75.3524	16152	201015L_YASAM07425_YAII63-13.raw	F4.9			851.269		912.936	532.833	757.84					848.664						5.55	1	FALSE	0.0001042	1.782e-07
High	Unambiguous	[K].vGTDLLEEEITk.[F]	N-Term(TMTpro); K12(TMTpro)	1	P29692	P29692	0	2	0.1989	0	1	1	978.063	1955.12	1955.12	-0.34	-0.00033	CID (Collision Induced Dissociation)	MS2	31.8968	22.2	58.326	75.2275	16130	201015L_YASAM07425_YAII63-13.raw	F4.9	4699.02	3795.86	8017.35	4818.58	4391.77	7168.23	7462.86	5321.38	2452.14	4136.18	6682.83	8184.9	6569.07	7297.86	6599.33	3762.83		3.77	1	FALSE	0.0001042	3.439e-05
High	Unambiguous	[R].lQEVPHEGPMcDLLWSDPDDR.[G]	N-Term(TMTpro); C11(Carbamidomethyl)	2	P62714	P62714; P67775	0	3	0.6416	0	1	1	938.445	2813.32	2813.32	-0.07	-6e-05	CID (Collision Induced Dissociation)	MS2	10.2338	11.9	59.866	75.0739	16101	201015L_YASAM07425_YAII63-13.raw	F4.9	3768.9	2806.36	2957.39	4276.72	2933.19	3460.23	2604.18	2574.39	829.515	2958.5	3067.03	3506.87	2746.06	4750.03	2811.84	1857.19		4.52	1	FALSE	0.0001042	1.266e-06
High	Unambiguous	[KR].sYELPDGQVITIGNER.[F]	N-Term(TMTpro)	10	P60709; P68133; Q562R1	A5A3E0; P63267; Q9BYX7; P60709; Q6S8J3; P62736; P68133; Q562R1; P68032; P63261	0	2	0.5861	0	1	1	1048.05	2095.1	2095.1	0.05	5e-05	CID (Collision Induced Dissociation)	MS2	8.06963	18.7	78.97	75.0408	16093	201015L_YASAM07425_YAII63-13.raw	F4.9	4605.32	5132.32	5316.8	3986.59	3749.53	5332.27	5024.82	4650.57	1991.28	4675.23	6656.04	6648.93	4400.72	5379.56	4380.28	3048.69		5.17	3	FALSE	0.0001042	3.452e-07
High	Unambiguous	[K].iFDIDEAEEGVk.[D]	N-Term(TMTpro); K12(TMTpro)	1	P20042	P20042	0	2	0.5012	0	1	1	987.039	1973.07	1973.07	-0.36	-0.00036	CID (Collision Induced Dissociation)	MS2	6.42066	18.6	114.193	74.9844	16080	201015L_YASAM07425_YAII63-13.raw	F4.9	3809.74	3603.83	6013.09	4465.96	3901.96	7173.38	6335.25	3490.02	1194.77	3449.39	4599.63	6448.22	4216.38	6453.06	4388.07	3222.26		4.07	1	FALSE	0.0001042	7.521e-06
High	Unambiguous	[K].gAEEMETVIPVDVMR.[R]	N-Term(TMTpro)	1	Q99497	Q99497	0	2	0.5547	0	1	1	990.51	1980.01	1980.01	1.08	0.00107	CID (Collision Induced Dissociation)	MS2	0	13.2	73.97	74.9553	16073	201015L_YASAM07425_YAII63-13.raw	F4.9	3060.4	3195.95	3376.41	3541.32	2996.93	3944.81	3208.57	3769.35	1606.36	3655.75	3166.05	3080.43	3085.54	3846.19	3380.33	2488.5		5.12	1	FALSE	0.0001042	2.25e-05
High	Unambiguous	[R].fNTANDDNVTQVR.[A]	N-Term(TMTpro)	1	P04040	P04040	0	2	0.5279	0	1	1	899.455	1797.9	1797.91	-0.8	-0.00072	CID (Collision Induced Dissociation)	MS2	16.0269	43	17.118	59.9346	11421	201015L_YASAM07425_YAII63-13.raw	F4.9	17451.4	14672.2	22915	16947.7	17559.5	20753.2	18018.5	16864.1	6979.76	17541.8	24615.4	21625.3	17445.4	18943.8	14338.6	14558.6		3.94	1	FALSE	0.0001042	1.544e-06
High	Unambiguous	[R].eSVFTVEGGHR.[A]	N-Term(TMTpro)	1	Q99623	Q99623	0	3	0.6114	0	1	1	507.937	1521.8	1521.8	-1.34	-0.00068	CID (Collision Induced Dissociation)	MS2	54.1417	26	8.265	59.9174	11414	201015L_YASAM07425_YAII63-13.raw	F4.9	17400.3	19700.3	17607.6	17187.5	16285.6	18514.4	21292.7	17329.3	6260.91	18857.4	21414.5	20947.6	20976.3	18313.6	18753.9	12122.3		4.4	1	FALSE	0.0001042	2.616e-05
High	Unambiguous	[K].gDATVSYEDPPTAk.[A]	N-Term(TMTpro); K14(TMTpro)	1	Q01844	Q01844	0	3	0.4431	0	1	1	687.032	2059.08	2059.08	-0.6	-0.00041	CID (Collision Induced Dissociation)	MS2	16.9814	12.6	3.882	59.8883	11399	201015L_YASAM07425_YAII63-13.raw	F4.9	24360.6	12873.1	22809.3	21456.8	16730.3	29899.1	25532.9	17730.5	6344.56	17087.5	23064.3	24564	15565.1	26310.6	31452.4	18012.9		4.22	1	FALSE	0.0001042	5.485e-06
High	Unambiguous	[R].lQAALDDEEAGGRPAmEPGNGSLDLGGDSAGR.[S]	N-Term(TMTpro); M16(Oxidation)	1	Q00839	Q00839	0	3	0.7276	0	1	1	1149.55	3446.65	3446.64	1.31	0.00151	CID (Collision Induced Dissociation)	MS2	0	7.7	119.5	69.7041	14214	201015L_YASAM07425_YAII63-12.raw	F4.8	2095.95	2085.24	1521.04	1947.77	1083.87	2017.85	1838.23	1716.65	973.32	1946.6	2825.68	2562.28	1849.84	1810.71	2474.05	1711.87		5.03	1	FALSE	0.0001042	0.0003826
High	Unambiguous	[K].iLDQGEDFPASEmTR.[I]	N-Term(TMTpro); M13(Oxidation)	1	P30040	P30040	0	3	0.481	0	1	1	677.002	2028.99	2028.99	1.98	0.00134	CID (Collision Induced Dissociation)	MS2	29.603	6.6	25.378	69.6701	14204	201015L_YASAM07425_YAII63-12.raw	F4.8	3314.78	2621.41	2896.39	2157.85	2149.72	1581.32	2464.55	1866.31	1648.62	2311.11	1276.68	1803.56	2837.07	3013.63	1465.36	2647.93		3.68	1	FALSE	0.0001042	2.468e-06
High	Unambiguous	[R].gAYGGGYGGYDDYGGYNDGYGFGSDR.[F]	N-Term(TMTpro)	1	P55795	P55795	0	3	0.9076	0	1	1	988.749	2964.23	2964.23	0.21	0.00021	CID (Collision Induced Dissociation)	MS2	0	8.7	73.97	69.6292	14194	201015L_YASAM07425_YAII63-12.raw	F4.8	2168.39	2161.01	2091.96	2161.3	1706.48	2711.94	2617.72	1343.02	855.6	1817.88	3004.21	2868.47	2633.91	3064.64	1924.97	1568.68		5.95	1	FALSE	0.0001042	4.151e-11
High	Unambiguous	[R].aQAVLEEDHYGMEDVk.[K]	N-Term(TMTpro); K16(TMTpro)	1	P36776	P36776	0	3	0.6263	0	1	1	814.755	2442.25	2442.25	1.64	0.00133	CID (Collision Induced Dissociation)	MS2	0	21	34.316	69.6032	14185	201015L_YASAM07425_YAII63-12.raw	F4.8	5061.73	3393.51	6392.43	6309.44	4226.15	9053.28	7397.93	5276	1851.01	4633.82	5508.2	7417.93	4561.58	7677.3	4407.41	3917.53		5.86	1	FALSE	0.0001042	4.723e-07
High	Unambiguous	[R].gcAADDIMDPTSLAETQEDHNGGQk.[Q]	N-Term(TMTpro); C2(Carbamidomethyl); K25(TMTpro)	1	P05107	P05107	0	3	0.6911	0	1	1	1090.18	3268.53	3268.53	0.18	0.00019	CID (Collision Induced Dissociation)	MS2	0	7.5	73.13	69.5665	14176	201015L_YASAM07425_YAII63-12.raw	F4.8	1745.66	1694.3	2017.19	1453.28	1437.41	2757.6	2514.91	1962.02	854.715	1225.23	2191.92	2194.75	1588.35	2181.34	2662.37	1217.52		6.28	1	FALSE	0.0001042	2.888e-08
High	Unambiguous	[R].sELHIENLNMEADPGQYR.[C]	N-Term(TMTpro)	1	P35613	P35613	0	3	0.586	0	1	1	807.402	2420.19	2420.18	3.54	0.00286	CID (Collision Induced Dissociation)	MS2	54.2597	11.7	17.183	69.5637	14175	201015L_YASAM07425_YAII63-12.raw	F4.8	3313.68	2840.3	3059.97	3204.33	2382.71	3708.91	2326.4	3094.68	1552.38	2843.2	3535.96	3248.36	3222.07	3916.05	2796.87	2573.88		4.01	1	FALSE	0.0001042	1.411e-05
High	Unambiguous	[R].lQAALDDEEAGGRPAmEPGNGSLDLGGDSAGR.[S]	N-Term(TMTpro); M16(Oxidation)	1	Q00839	Q00839	0	4	0.7884	0	1	1	862.416	3446.64	3446.64	-0.16	-0.00014	CID (Collision Induced Dissociation)	MS2	0	7.9	27.907	69.7386	14225	201015L_YASAM07425_YAII63-12.raw	F4.8	2070.66	2150.66	2236.28	2313.89	2366.74	2464.13	1260.55	1918.48	889.721	1868.62	1849.56	1847.91	2559.82	2339.04	2332.51	1991.73		5.67	1	FALSE	0.0001042	1.971e-10
High	Unambiguous	[K].nIEIDSPYEISR.[A]	N-Term(TMTpro)	1	P04843	P04843	0	2	0.4841	0	1	1	870.461	1739.91	1739.91	0.35	0.00031	CID (Collision Induced Dissociation)	MS2	5.7434	23.2	54.647	69.5589	14173	201015L_YASAM07425_YAII63-12.raw	F4.8	5481.97	4647.31	6626.44	6701.95	4617.47	7216.05	7679.58	6164.17	2225.43	4619.44	5967.54	7148.17	6587.66	8139.62	6944.91	3292.64		4.09	1	FALSE	0.0001042	7.699e-05
High	Unambiguous	[R].fPSGNQGGAGPSQGSGGGTGGSVYTEDNDDDLYG.[-]	N-Term(TMTpro)	1	P55072	P55072	0	3	0.8039	0	1	1	1175.51	3524.53	3524.53	0.36	0.00042	CID (Collision Induced Dissociation)	MS2	0	2.2	119.5	69.3563	14123	201015L_YASAM07425_YAII63-12.raw	F4.8		599.793	655.441	677.639	707.289	552.416	509.136			669.592	755.338	960.779	834.565	996.795		926.121		5.61	1	FALSE	0.0001042	3.194e-05
High	Unambiguous	[K].dHQYQFLEDAVR.[N]	N-Term(TMTpro)	1	Q13263	Q13263	0	3	0.6214	0	1	1	608.979	1824.92	1824.92	1.06	0.00064	CID (Collision Induced Dissociation)	MS2	0	3.6	19.331	69.3165	14113	201015L_YASAM07425_YAII63-12.raw	F4.8	1463.47	1009.81	1348.88	2064.32	1006.51	1201.77	801.551	1571.6		1327.18	1367.31	1255.59	1092.74	1609.44				4.49	1	FALSE	0.0001042	1.733e-06
High	Unambiguous	[R].sWQDELAQQAEEGSAR.[L]	N-Term(TMTpro)	1	Q86UE4	Q86UE4	0	2	0.5723	0	1	1	1055.01	2109.02	2109.02	-0.76	-0.0008	CID (Collision Induced Dissociation)	MS2	24.0702	9.2	73.43	69.2209	14088	201015L_YASAM07425_YAII63-12.raw	F4.8	1910.27	2425.17	2207.37	2074.44	1511.62	3313.51	2768.76	1930.36	1195.4	2311.88	2580.98	2669.36	2066.82	2115.76	1878.67	2236.78		5.12	1	FALSE	0.0001042	4.021e-06
High	Unambiguous	[K].iLDQGEDFPASEmTR.[I]	N-Term(TMTpro); M13(Oxidation)	1	P30040	P30040	0	2	0.5422	0	1	1	1015	2028.99	2028.99	-0.42	-0.00042	CID (Collision Induced Dissociation)	MS2	13.1168	13.2	119.5	69.2054	14083	201015L_YASAM07425_YAII63-12.raw	F4.8	3731.31	2926.36	4447.56	3815.46	2732.51	4110.3	3752.04	3146.33	1331.91	2990.57	4288.51	4193.73	3200.94	4379.69	4156.56	2683.73		3.67	1	FALSE	0.0001042	0.0001696
High	Unambiguous	[R].aGGIETIANEYSDR.[C]	N-Term(TMTpro)	1	P34932	P34932	0	2	0.5556	0	1	1	900.458	1799.91	1799.91	-0.14	-0.00012	CID (Collision Induced Dissociation)	MS2	0	22.5	64.745	69.1597	14072	201015L_YASAM07425_YAII63-12.raw	F4.8	5176.6	4575.44	6180.19	6323.9	5465.02	7000.65	6652.94	4293.59	1519.64	3843.36	7055.53	6534.71	5743.59	7376.56	5200.31	3734.89		4.59	1	FALSE	0.0001042	2.63e-06
High	Unambiguous	[K].vYENYPTYDLTER.[K]	N-Term(TMTpro)	1	P35659	P35659	0	2	0.4784	0	1	1	983.989	1966.97	1966.97	-0.56	-0.00055	CID (Collision Induced Dissociation)	MS2	17.9493	17.6	119.5	69.1563	14071	201015L_YASAM07425_YAII63-12.raw	F4.8	3846.35	2844	4532.7	5390.38	3943.55	6887.61	6265.05	3981.05	1850.27	3509.39	5097.28	5318.42	4413.98	4772.81	4082.14	3394.25		3.93	1	FALSE	0.0001042	6.473e-05
High	Unambiguous	[R].sLETENSALQLQVTER.[E]	N-Term(TMTpro)	1	P20700	P20700	0	2	0.5079	0	1	1	1061.57	2122.13	2122.13	0.37	0.0004	CID (Collision Induced Dissociation)	MS2	18.7407	10.6	119.5	69.3896	14132	201015L_YASAM07425_YAII63-12.raw	F4.8	2850.33	2087.97	4234.98	2354.82	2642.56	2868.56	2967.82	2603.61	816.313	2339.87	2309.18	3861.23	2566.88	4554.89	2106.09	1946.95		5.04	1	FALSE	0.0001042	1.879e-05
High	Unambiguous	[K].yTELPHGAISEDQAVGPADIPcDSTGQTST.[-]	N-Term(TMTpro); C22(Carbamidomethyl)	1	Q9H773	Q9H773	0	3	0.7363	0	1	1	1141.21	3421.61	3421.6	0.87	0.00099	CID (Collision Induced Dissociation)	MS2	10.0268	3.3	72.71	69.7808	14237	201015L_YASAM07425_YAII63-12.raw	F4.8	1157.75	587.313	573.145	877.427	1052.48	1884.79	1359.19				1222.88	1380.82	703.84	886.041	843.155	1055.03		4.74	1	FALSE	0.0001042	2.433e-06
High	Unambiguous	[R].yFEADPPGQVAASPDPTT.[-]	N-Term(TMTpro)	1	O43598	O43598	0	2	0.75	0	1	1	1084.03	2167.05	2167.05	1.63	0.00177	CID (Collision Induced Dissociation)	MS2	39.9411	18.8	119.5	69.8097	14244	201015L_YASAM07425_YAII63-12.raw	F4.8	4464.59	4421.08	4600.92	4874.84	3838.79	4967.14	5512.73	4919.1	2734.49	5026.81	4287.43	6104.63	4465.55	4597.16	3811.1	4419.9		4.24	1	FALSE	0.0001042	6.222e-06
High	Unambiguous	[K].tEMQDNTYPEILR.[S]	N-Term(TMTpro)	1	O43143	O43143	0	2	0.297	0	1	1	957.485	1913.96	1913.96	1.83	0.00176	CID (Collision Induced Dissociation)	MS2	0	12.8	84.846	69.8218	14247	201015L_YASAM07425_YAII63-12.raw	F4.8	4051.93	2742.98	3927.35	3427.84	3262.2	3483.84	4721.17	2341.07	687.799	2264.82	2993.85	4892.29	2828.78	4897.36	2670.58	2792.83		3.03	1	FALSE	0.0001042	0.0001832
High	Unambiguous	[K].lVQDVANNTNEEAGDGTTTATVLAR.[S]	N-Term(TMTpro)	1	P10809	P10809	0	2	0.6506	0	1	1	1432.73	2864.46	2864.46	0.92	0.00131	CID (Collision Induced Dissociation)	MS2	0	7.1	70.31	70.1965	14368	201015L_YASAM07425_YAII63-12.raw	F4.8	2222.25	1341.93	1808.31	2406.2	1165.27	2515.81	2396.6	1832.53		1989.38	2072.3	1796.32	2142.97	2309.66	1488.69	944.284		6.84	1	FALSE	0.0001042	1.242e-06
High	Unambiguous	[R].fSPDGELYASGSEDGTLR.[L]	N-Term(TMTpro)	1	Q9Y3F4	Q9Y3F4	0	2	0.7797	0	1	1	1103.04	2205.06	2205.06	0.21	0.00023	CID (Collision Induced Dissociation)	MS2	0	10.6	119.5	70.1931	14367	201015L_YASAM07425_YAII63-12.raw	F4.8	2267.9	2253.65	3790.68	2469.85	2391.47	3822.71	3004.03	2017.92	1250.02	2545.02	2381.86	3157.69	3590.36	3506.4	3347.59	2299.1		5.13	1	FALSE	0.0001042	9.357e-07
High	Unambiguous	[K].lVQDVANNTNEEAGDGTTTATVLAR.[S]	N-Term(TMTpro)	1	P10809	P10809	0	3	0.6245	0	1	1	955.491	2864.46	2864.46	0.49	0.00046	CID (Collision Induced Dissociation)	MS2	1.905	16.9	14.401	70.1849	14363	201015L_YASAM07425_YAII63-12.raw	F4.8	4170.92	4642.08	3601.87	4751.31	3786.69	4226.53	4067.94	3644.09	1874.13	4426.06	4897.3	6115.28	4610.23	5329.98	4695.83	3853.28		6.95	1	FALSE	0.0001042	1.933e-07
High	Unambiguous	[R].vGYYVNNEYTETELR.[E]	N-Term(TMTpro)	1	Q9Y294	Q9Y294	0	2	0.5797	0	1	1	1077.54	2154.07	2154.07	1.02	0.0011	CID (Collision Induced Dissociation)	MS2	14.9513	10.3	119.5	70.1337	14344	201015L_YASAM07425_YAII63-12.raw	F4.8	2898.54	1783.06	2721.67	3012.04	2796.91	3366.61	2866.25	2222.66	713.772	2894.66	2761.25	2802.69	2754.03	4522.29	2261.83	2173.42		3.45	1	FALSE	0.0001042	1.433e-05
High	Unambiguous	[R].dELADEIANSSGk.[G]	N-Term(TMTpro); K13(TMTpro)	1	P35579	P35579	0	2	0.4186	0	1	1	979.022	1957.04	1957.04	-0.47	-0.00046	CID (Collision Induced Dissociation)	MS2	42.4485	16.5	72.613	70.1177	14338	201015L_YASAM07425_YAII63-12.raw	F4.8	2760.16	2732.04	5107.86	4375.38	2680.15	6926.03	5011.1	4460.25	1162.28	3556.33	3899	6968.83	3231.8	7203.38	2168.26	2828.34		4.73	1	FALSE	0.0001042	0.0001236
High	Unambiguous	[K].gVGVALDDPYENYR.[R]	N-Term(TMTpro)	1	Q8IWX8	Q8IWX8	0	2	0.4597	0	1	1	936.477	1871.95	1871.95	0.45	0.00042	CID (Collision Induced Dissociation)	MS2	8.80904	19.4	74.42	70.1023	14333	201015L_YASAM07425_YAII63-12.raw	F4.8	4358.48	4022.15	6458.18	4850.47	3711.85	6529.57	6638	5315.63	2587.05	3811.4	5162.1	6746.44	5318.72	7066.34	3086.31	3345.51		3.35	1	FALSE	0.0001042	2.073e-05
High	Unambiguous	[R].sAGQGEVLVYVEDPAGHQEEAk.[V]	N-Term(TMTpro); K22(TMTpro)	1	P21333	P21333	0	3	0.7061	0	1	1	974.508	2921.51	2921.51	-1.06	-0.00103	CID (Collision Induced Dissociation)	MS2	10.2712	21.5	116.992	70.0584	14319	201015L_YASAM07425_YAII63-12.raw	F4.8	5258.44	4436.69	5958.38	5190.08	4534.91	7045.91	7506.01	6350.9	1409.89	3935.71	4756.47	7824.65	4975.42	5807.19	6040.83	3706.71		6.67	1	FALSE	0.0001042	3.272e-11
High	Unambiguous	[R].sEDPDQQYLILNTAR.[K]	N-Term(TMTpro)	1	Q96QK1	Q96QK1	0	2	0.52	0	1	1	1034.04	2067.07	2067.07	0.31	0.00032	CID (Collision Induced Dissociation)	MS2	19.1517	14.2	73.61	70.0313	14310	201015L_YASAM07425_YAII63-12.raw	F4.8	2958.24	2833.96	3520.19	4401.67	2954.86	3300.86	3495.39	3742.3	2076.35	2452.92	3951.69	4216.98	4160.85	3442.84	5223.83	2752.18		3.75	1	FALSE	0.0001042	3.266e-05
High	Unambiguous	[R].eTIELVHTEPTDVAQLPSR.[V]	N-Term(TMTpro)	1	Q6IBS0	Q6IBS0	0	3	0.6342	0	1	1	813.774	2439.31	2439.31	1.42	0.00116	CID (Collision Induced Dissociation)	MS2	41.7839	13.9	32.956	70.0187	14304	201015L_YASAM07425_YAII63-12.raw	F4.8	3162.61	3753.21	4299.74	3990.15	2163.2	4153.85	4164.36	4478.01	2013.31	2671.67	3739.87	4227.62	3170.36	3219.39	3164.68	2693.12		5.44	1	FALSE	0.0001042	2.3e-06
High	Unambiguous	[K].lEESYTLNSDLAR.[L]	N-Term(TMTpro)	1	P30740	P30740	0	2	0.2015	0	1	1	907.977	1814.95	1814.95	0.25	0.00022	CID (Collision Induced Dissociation)	MS2	45.8391	33.4	30.543	70.0056	14299	201015L_YASAM07425_YAII63-12.raw	F4.8	6892.4	6297.26	9032.83	8105.11	6683.11	11953.5	11371.8	8562.98	2253.01	7263.86	9457.66	12752.7	9392.74	8543.46	9117.64	4732.7		2.73	1	FALSE	0.0001042	0.0001154
High	Unambiguous	[K].nADMSEEmQQDSVEcATQALEk.[Y]	N-Term(TMTpro); M8(Oxidation); C15(Carbamidomethyl); K22(TMTpro)	1	P63167	P63167	0	3	0.1537	0	1	1	1046.82	3138.45	3138.45	-0.77	-0.00081	CID (Collision Induced Dissociation)	MS2	29.4901	14.8	73.49	69.9393	14281	201015L_YASAM07425_YAII63-12.raw	F4.8	4685.76	3093.16	4857.96	4503	2927.75	4678.65	5490.21	4309.07	1186.92	2154.06	4012.36	4651.39	3932.44	5827.86	3438.76	2418.26		5.01	1	FALSE	0.0001042	7.36e-08
High	Unambiguous	[R].dIGAIAQVHAENGDIIAEEQQR.[I]	N-Term(TMTpro)	1	Q16555	Q16555	0	3	0.6841	0	1	1	894.466	2681.38	2681.38	0.57	0.00051	CID (Collision Induced Dissociation)	MS2	21.7798	16.4	32.99	69.9374	14280	201015L_YASAM07425_YAII63-12.raw	F4.8	4125.13	5204.24	3407.44	4605.77	4398.96	6467.95	4275.02	3695.86	2161.74	3885.95	3550.49	5926.39	2535.66	4171.78	4049.23	2895.16		7.09	1	FALSE	0.0001042	2.95e-08
High	Unambiguous	[K].rPPEPTTPWQEDPEPEDENLYEk.[N]	N-Term(TMTpro); K23(TMTpro)	1	Q9NX14	Q9NX14	0	3	0.6738	0	1	1	1135.56	3404.68	3404.68	0.08	9e-05	CID (Collision Induced Dissociation)	MS2	4.57449	12.1	119.5	69.9143	14274	201015L_YASAM07425_YAII63-12.raw	F4.8	3011.67	1199.55	3417.75	2877.45	2409.67	4988.65	4461.67	3496.9	881.972	2947.74	3768.54	3757.31	1819.19	4369.31	3511.91	2389.72		6.07	1	FALSE	0.0001042	2.776e-05
High	Unambiguous	[K].iREDLPNLESSEETEQINk.[H]	N-Term(TMTpro); K19(TMTpro)	1	Q96QK1	Q96QK1	1	3	0.6	0	1	1	951.51	2852.52	2852.51	0.7	0.00066	CID (Collision Induced Dissociation)	MS2	29.2122	16.3	71.822	69.8993	14269	201015L_YASAM07425_YAII63-12.raw	F4.8	3188.82	4110.09	4781.9	3232.66	3954.93	6127.73	4439.32	4096.32	869.827	3069.18	4760.51	5650.59	4100.67	5514.83	4766.01	2901.28		5.2	1	FALSE	0.0001042	4.717e-06
High	Unambiguous	[K].eDPDMASAVAAIR.[T]	N-Term(TMTpro)	1	Q14232	Q14232	0	2	0.44	0	1	1	825.428	1649.85	1649.85	0.31	0.00025	CID (Collision Induced Dissociation)	MS2	16.7813	12.8	39.231	69.8334	14250	201015L_YASAM07425_YAII63-12.raw	F4.8	2613.74	2732.62	3613.78	3115.39	2976.21	3915.53	5072.44	3284.61	1471.89	2791.29	3335.59	4062.43	2691.87	4502.37	3058.87	2935.14		3	1	FALSE	0.0001042	8.131e-05
High	Unambiguous	[K].tYGADLASVDFQHASEDAR.[K]	N-Term(TMTpro)	1	P30740	P30740	0	3	0.6448	0	1	1	786.382	2357.13	2357.13	-0.74	-0.00058	CID (Collision Induced Dissociation)	MS2	39.3403	17.1	16.35	69.1382	14064	201015L_YASAM07425_YAII63-12.raw	F4.8	6265.17	3767.38	6173.76	6805	4034.81	8371.07	8805.57	5806.79	2761.89	4367.56	6809.38	8275.61	7643.52	7836.1	5706.79	2858.53		5.04	1	FALSE	0.0001042	4.423e-08
High	Unambiguous	[K].lEEEGEQFVk.[K]	N-Term(TMTpro); K10(TMTpro)	1	P22307	P22307	0	2	0.5026	0	1	1	908.503	1816	1816	0.24	0.00021	CID (Collision Induced Dissociation)	MS2	49.249	48.5	21.62	70.2079	14372	201015L_YASAM07425_YAII63-12.raw	F4.8	10278.7	8561.2	13049.1	13279.3	9425.21	17772.6	15902.2	10937.4	3256.48	9176.55	13604.2	18927	12277	15531.2	10939.2	8481.74		3.9	1	FALSE	0.0001042	0.0001713
High	Unambiguous	[K].aLTSQLTDEELAQGR.[L]	N-Term(TMTpro)	1	P23368	P23368	0	2	0.3819	0	1	1	968.519	1936.03	1936.03	-0.11	-0.0001	CID (Collision Induced Dissociation)	MS2	49.1866	26.1	55.007	69.1264	14060	201015L_YASAM07425_YAII63-12.raw	F4.8	4305.56	6171.78	7392.41	8293.64	6659.7	8456.61	10768.8	5174.83	2975.93	7948.54	6562.69	6688.96	5823.71	6979.97	6884.71	4958.97		4.19	1	FALSE	0.0001042	8.95e-06
High	Unambiguous	[K].tLSDDLDEAAk.[E]	N-Term(TMTpro); K11(TMTpro)	1	Q9H0A0	Q9H0A0	0	2	0.42	0	1	1	893.489	1785.97	1785.97	-1.02	-0.00091	CID (Collision Induced Dissociation)	MS2	26.5025	23.7	74.75	68.9978	14020	201015L_YASAM07425_YAII63-12.raw	F4.8	4670.9	3649.32	6239.88	5076.59	4807.23	8084.67	8922.87	6531	1876.38	5089.79	6743.85	8923.19	6446.39	8953.61	7022.44	4400.37		3.5	1	FALSE	0.0001042	0.0003649
High	Unambiguous	[K].rEVDDLGPEVGDIk.[I]	N-Term(TMTpro); K14(TMTpro)	1	O43143	O43143	1	3	0.4202	0	1	1	717.401	2150.19	2150.19	-2.39	-0.00171	CID (Collision Induced Dissociation)	MS2	47.1186	13.5	24.034	68.1518	13769	201015L_YASAM07425_YAII63-12.raw	F4.8	4174.41	4358.82	5838.94	5271.91	3150.83	4708.79	7157.38	5570.24	1256.48	3607.66	3717.24	5689.75	6518.93	7541.9	4642.03	3521.28		4.26	1	FALSE	0.0001042	5.367e-05
High	Unambiguous	[K].dYGVYLEDSGHTLR.[G]	N-Term(TMTpro)	1	Q13162	Q13162	0	3	0.6602	0	1	1	643.662	1928.97	1928.97	1.55	0.001	CID (Collision Induced Dissociation)	MS2	8.77176	3.9	35.825	68.1201	13760	201015L_YASAM07425_YAII63-12.raw	F4.8	1153.76		933.407	968.098	581.35	1837.31	2080.73	1196.48		1231.99	1090.83	783.257	1129.09	1716.13	1231.5			5.68	1	FALSE	0.0001042	1.614e-07
High	Unambiguous	[K].lEAEGVPEVSEk.[Y]	N-Term(TMTpro); K12(TMTpro)	1	O76003	O76003	0	2	0.374	0	1	1	948.034	1895.06	1895.06	-0.47	-0.00044	CID (Collision Induced Dissociation)	MS2	33.0164	29.2	68.131	68.0421	13733	201015L_YASAM07425_YAII63-12.raw	F4.8	6269.74	5512.68	8322.93	8262.9	5222.58	9903.99	10728.5	7108.72	2869.94	6425.12	7692.9	9862.91	7834.94	10587	7348.15	5002.39		3.77	1	FALSE	0.0001042	0.0003823
High	Unambiguous	[R].hPDVEVDGFSELR.[W]	N-Term(TMTpro)	1	P09874	P09874	0	3	0.6577	0	1	1	601.979	1803.92	1803.92	1.56	0.00094	CID (Collision Induced Dissociation)	MS2	0	6.4	20.352	68.0271	13727	201015L_YASAM07425_YAII63-12.raw	F4.8	1426.69	1357.42	1321.29	1931.38	1457.11	2072.01	2051.72	1281.14	795.419	1153.04	1721.36	2332.17	2130.46	1788.01	1594.13	1458.71		4.44	1	FALSE	0.0001042	3.911e-05
High	Unambiguous	[R].wQPDTEEEYEDSSGNVVNk.[K]	N-Term(TMTpro); K19(TMTpro)	1	Q12874	Q12874	0	2	0.7607	0	1	1	1417.69	2834.37	2834.36	1.35	0.00191	CID (Collision Induced Dissociation)	MS2	0	5	119.5	68.0238	13726	201015L_YASAM07425_YAII63-12.raw	F4.8	1639.58	664.534	1355.92	1046.92	1015.92	1091.63	1928.82	1863.07		1371.06	1406.72	2171.94	1396.14	690.138	980.603	768.024		5.85	1	FALSE	0.0001042	1.076e-05
High	Unambiguous	[R].dADDAVYELNGk.[ED]	N-Term(TMTpro); K12(TMTpro)	2	Q13247; Q08170	Q13247; Q08170	0	2	0.5156	0	1	1	959.505	1918	1918	-1.28	-0.00123	CID (Collision Induced Dissociation)	MS2	19.1253	22.2	61.857	68.0083	13720	201015L_YASAM07425_YAII63-12.raw	F4.8	5000.07	4301.91	8316.5	5554.58	4062.68	9226.21	7129.44	6098.03	1774.04	3402.03	5941.48	9593.44	6327.51	7738.21	4592.17	3837.4		4.5	2	FALSE	0.0001042	2.954e-05
High	Unambiguous	[K].sLYVAEYHSEPVEDEkP.[-]	N-Term(TMTpro); K16(TMTpro)	1	P26196	P26196	0	3	0.4751	0	1	1	867.45	2600.34	2600.34	-0.31	-0.00027	CID (Collision Induced Dissociation)	MS2	36.3698	51.2	23.354	68.2085	13786	201015L_YASAM07425_YAII63-12.raw	F4.8	12205.1	10342.7	15568.9	13363	10981.3	18134.1	16046.6	14531.4	3593.4	11984.5	14500.3	19905.3	12854.7	18528.5	12947.2	9098.36		3.62	1	FALSE	0.0001042	3.285e-07
High	Unambiguous	[R].yHTSQSGDEMTSLSEYVSR.[M]	N-Term(TMTpro)	1	P08238	P08238	0	2	0.6934	0	1	1	1241.08	2481.15	2481.15	-0.65	-0.00081	CID (Collision Induced Dissociation)	MS2	0	4.2	71.9	67.967	13704	201015L_YASAM07425_YAII63-12.raw	F4.8	786.001	1026.12	1133.06	1047.55	1069.2	1200.11	1187.5	1140.81	777.841	1238.7	1443.26	1999.63	679.19	1577.83	549.923	767.106		6.23	1	FALSE	0.0001042	1.369e-06
High	Unambiguous	[R].lPPEEASPYVVDHGESGPLR.[C]	N-Term(TMTpro)	1	P53992	P53992	0	3	0.6374	0	1	1	818.427	2453.27	2453.26	1.79	0.00146	CID (Collision Induced Dissociation)	MS2	35.9305	10.5	36.354	67.9143	13687	201015L_YASAM07425_YAII63-12.raw	F4.8	3300.62	2741.71	3108.8	3598.68	1692.14	2256.09	2286.32	1728.07	1530.79	3708.5	3051.67	2829.82	3034.1	3211.51	2004.13	2309.73		5.93	1	FALSE	0.0001042	4.043e-06
High	Unambiguous	[R].gQDHcGIESEVVAGIPR.[T]	N-Term(TMTpro); C5(Carbamidomethyl)	1	P07858	P07858	0	3	0.68	0	1	1	710.03	2128.08	2128.08	-0.63	-0.00045	CID (Collision Induced Dissociation)	MS2	9.37916	8.3	24.776	67.9031	13683	201015L_YASAM07425_YAII63-12.raw	F4.8	2480.17	1650.19	2678.56	1536.04	2061.66	1849.61	2073.76	1872.75	1183.65	2454.53	2749.67	2936.2	2117.64	1478.77	947.099	1995.46		4.75	1	FALSE	0.0001042	3.213e-05
High	Unambiguous	[K].dLEEDHAcIPIk.[K]	N-Term(TMTpro); C8(Carbamidomethyl); K12(TMTpro)	1	P13639	P13639	0	2	0.4524	0	1	1	1024.55	2048.1	2048.1	-0.04	-5e-05	CID (Collision Induced Dissociation)	MS2	0	11.1	73.67	67.8346	13663	201015L_YASAM07425_YAII63-12.raw	F4.8	3752.33	1899.03	3628.3	2848.06	2768.97	2701.81	4211.42	2633.35	1112.22	1487.28	3736.04	3861.18	2547.23	3780.24	2181.13	1788.14		3.89	1	FALSE	0.0001042	2.801e-05
High	Unambiguous	[R].yHTSQSGDEMTSLSEYVSR.[M]	N-Term(TMTpro)	1	P08238	P08238	0	3	0.7778	0	1	1	827.722	2481.15	2481.15	-0.07	-5e-05	CID (Collision Induced Dissociation)	MS2	0	12.9	20.912	67.8329	13662	201015L_YASAM07425_YAII63-12.raw	F4.8	2623.24	4310.17	3853.91	3419.38	2676.53	3536.17	4346.85	3753.14	1336.97	4316.9	3903.16	3603.7	3089.87	3225.3	3529.17	2472.33		6.93	1	FALSE	0.0001042	3.015e-08
High	Unambiguous	[K].yDYNSGEELESYk.[G]	N-Term(TMTpro); K13(TMTpro)	1	Q9Y3F4	Q9Y3F4	0	2	0.5447	0	1	1	1103.05	2205.09	2205.08	0.87	0.00096	CID (Collision Induced Dissociation)	MS2	0	11	73.04	67.8205	13658	201015L_YASAM07425_YAII63-12.raw	F4.8	2080.8	2039.61	2972.81	3590.75	2161.25	3321.88	3792.6	2773.29	815.849	2008.04	2986.02	4281.32	3609.41	3357.02	2701.36	1998.53		4.81	1	FALSE	0.0001042	1.843e-05
High	Unambiguous	[K].dLEEDHAcIPIk.[K]	N-Term(TMTpro); C8(Carbamidomethyl); K12(TMTpro)	1	P13639	P13639	0	3	0.5812	0	1	1	683.371	2048.1	2048.1	0.1	7e-05	CID (Collision Induced Dissociation)	MS2	0	14.4	17.984	67.7663	13640	201015L_YASAM07425_YAII63-12.raw	F4.8	9931.24	5353.77	7535.78	8690.76	6443.25	9517.91	12886	7322.03	1545.38	3861.09	6601.62	11685.4	10001.6	10720.4	9327.32	4881.02		3.82	1	FALSE	0.0001042	7.504e-05
High	Unambiguous	[K].dQVTAQEIFQDNHEDGPTAk.[K]	N-Term(TMTpro); K20(TMTpro)	1	P13010	P13010	0	3	0.5885	0	1	1	951.149	2851.43	2851.44	-0.72	-0.00069	CID (Collision Induced Dissociation)	MS2	14.5409	24	105.194	67.9633	13703	201015L_YASAM07425_YAII63-12.raw	F4.8	6178.45	4092.85	7496.31	4607.87	5453.33	7694.61	6807.94	6763.21	1850.91	5141.45	7254.19	8459.64	6110.3	8532.97	4548.39	3935.68		5.2	1	FALSE	0.0001042	1.205e-05
High	Unambiguous	[K].nADmSEEmQQDSVEcATQALEk.[Y]	N-Term(TMTpro); M4(Oxidation); M8(Oxidation); C15(Carbamidomethyl); K22(TMTpro)	1	P63167	P63167	0	3	0.4161	0	1	1	1052.15	3154.45	3154.45	0.19	0.0002	CID (Collision Induced Dissociation)	MS2	15.177	6.4	119.5	68.2347	13795	201015L_YASAM07425_YAII63-12.raw	F4.8	1279.53	746.06	1223.14	1272.98	1952.67	1903.62	2534.49	1889.94		578.207	2413.48	2745.04	2327.63	1525.77	1814.46	1710.59		4.71	1	FALSE	0.0001042	4.937e-07
High	Unambiguous	[R].aGVLAHLEEER.[D]	N-Term(TMTpro)	2	P35579	P35580; P35579	0	3	0.5	0	1	1	509.953	1527.84	1527.85	-0.13	-7e-05	CID (Collision Induced Dissociation)	MS2	49.6409	10.1	24.702	68.2563	13801	201015L_YASAM07425_YAII63-12.raw	F4.8	2800.26	2733.7	2898.46	2144.77	2272.86	2935.52	3182.49	3041.96	1637.09	2408.22	2282.25	3339.73	2331.76	3232.1	1875.53	1298.17		3	1	FALSE	0.0001042	0.0001161
High	Unambiguous	[R].tIEQNINNLNVSEADR.[K]	N-Term(TMTpro)	1	Q15003	Q15003	0	2	0.476	0	1	1	1067.56	2134.1	2134.11	-1.11	-0.00119	CID (Collision Induced Dissociation)	MS2	10.5206	4.9	119.5	68.2804	13808	201015L_YASAM07425_YAII63-12.raw	F4.8	974.977	1058.41	2029.75	1438.18	1343.1	1568.29	1747.09	1026.74	922.75	1490.93	1400.33	1408.08	562.517	1086.01	701.53	1325.11		4.79	1	FALSE	0.0001042	8.633e-07
High	Unambiguous	[K].fLEESVSmSPEER.[A]	N-Term(TMTpro); M8(Oxidation)	1	P15374	P15374	0	2	0.4448	0	1	1	930.453	1859.9	1859.9	-1.02	-0.00095	CID (Collision Induced Dissociation)	MS2	11.7594	19.4	103.185	68.9947	14019	201015L_YASAM07425_YAII63-12.raw	F4.8	3548.19	4188.45	4781.31	5159.16	4720.71	5479.49	5879.11	3618.94	1828.09	3931.65	4094.86	5005.14	4654.29	6687.51	4952.1	3276.52		2.99	1	FALSE	0.0001042	0.0003334
High	Unambiguous	[K].sADESGQALLAAGHYASDEVR.[E]	N-Term(TMTpro)	1	Q13813	Q13813	0	3	0.5603	0	1	1	817.741	2451.21	2451.21	0.43	0.00035	CID (Collision Induced Dissociation)	MS2	5.73147	8.4	31.451	68.9796	14013	201015L_YASAM07425_YAII63-12.raw	F4.8	2602.66	2131.94	2311.32	2599.92	2089.8	1983.84	3061.05	1418.16	894.236	2052.9	2488.45	2113.15	3059.89	2204.9	1766.43	1685.56		7.3	1	FALSE	0.0001042	9.458e-12
High	Unambiguous	[R].mVSSYVGENAEFER.[Q]	N-Term(TMTpro)	1	P55809	P55809	0	2	0.5938	0	1	1	961.468	1921.93	1921.93	-0.12	-0.00011	CID (Collision Induced Dissociation)	MS2	37.5211	21.3	86.042	68.9536	14006	201015L_YASAM07425_YAII63-12.raw	F4.8	4492.59	5714.3	5889.16	5609.06	5174.86	6026.19	6669.62	6561.66	2146.95	5377.61	5874.26	5991.27	4790.1	5813.94	4353.69	4205.85		3.52	1	FALSE	0.0001042	1.298e-06
High	Unambiguous	[R].gAYGGGYGGYDDYNGYNDGYGFGSDR.[F]	N-Term(TMTpro)	1	P31943	P31943	0	2	0.94	0	1	1	1511.13	3021.25	3021.25	0.85	0.00128	CID (Collision Induced Dissociation)	MS2	0	2.4	119.5	68.9434	14002	201015L_YASAM07425_YAII63-12.raw	F4.8	1070.51		499.888	719.545		917.164		539.125		755.587	1085.94	1159.26	665.541	1143.37	935.504			5.67	1	FALSE	0.0001042	8.899e-05
High	Unambiguous	[K].iEPGVDPDDTYNETPYEk.[G]	N-Term(TMTpro); K18(TMTpro)	1	Q9H4A4	Q9H4A4	0	3	0.5542	0	1	1	897.448	2690.33	2690.33	-1.14	-0.00102	CID (Collision Induced Dissociation)	MS2	16.3723	16.7	61.934	68.8363	13967	201015L_YASAM07425_YAII63-12.raw	F4.8	3378.53	3219.76	4516.87	4374.79	3444.09	5752.73	5826.06	3930.96	1049.04	4005.76	4687.27	5926.12	3684.83	6248.56	4594.52	3758.36		5.07	1	FALSE	0.0001042	6.809e-05
High	Unambiguous	[R].gAYGGGYGGYDDYNGYNDGYGFGSDR.[F]	N-Term(TMTpro)	1	P31943	P31943	0	3	0.7367	0	1	1	1007.76	3021.25	3021.25	0.98	0.00099	CID (Collision Induced Dissociation)	MS2	5.7131	11.3	85.986	68.8318	13965	201015L_YASAM07425_YAII63-12.raw	F4.8	3026.76	2963.48	3863.96	2754.16	2135.84	3539.01	2609.84	2626.52	1754.87	3139.04	2893.33	3966.32	2867.25	2646.55	2872.97	1778.21		7.33	1	FALSE	0.0001042	1.974e-09
High	Unambiguous	[R].dSSTcPGDYVLSVSENSR.[V]	N-Term(TMTpro); C5(Carbamidomethyl)	1	P46109	P46109	0	2	0.6576	0	1	1	1139.04	2277.07	2277.06	1.88	0.00214	CID (Collision Induced Dissociation)	MS2	43.7294	16.1	118.947	68.7389	13939	201015L_YASAM07425_YAII63-12.raw	F4.8	3313.95	3387.12	3646.83	4591.98	4115.09	5082.72	5274.99	3795.74	1848.71	3773.76	2901.66	5609.58	4365.59	6636.83	3646.28	3532.54		5.17	1	FALSE	0.0001042	8.297e-07
High	Unambiguous	[K].dLAHTPSQLEGLDPATEAR.[Y]	N-Term(TMTpro)	1	O75909	O75909	0	3	0.553	0	1	1	775.74	2325.2	2325.2	1.77	0.00137	CID (Collision Induced Dissociation)	MS2	7.08425	6.9	31.264	68.7091	13930	201015L_YASAM07425_YAII63-12.raw	F4.8	2245.8	1395.99	1423.3	2082.1	1437.85	2312.3	1700.09	893.082	720.868	1553.56	1783.26	2429.44	2015.12	2124.41	2063.63	858.58		5.28	1	FALSE	0.0001042	0.0001884
High	Unambiguous	[R].eSDYFTPQGEFR.[V]	N-Term(TMTpro)	1	Q8TCJ2	Q8TCJ2	0	2	0.63	0	1	1	890.43	1779.85	1779.85	0.88	0.00079	CID (Collision Induced Dissociation)	MS2	20.4332	21.3	72.579	68.6606	13919	201015L_YASAM07425_YAII63-12.raw	F4.8	5157.5	4736.02	5400.38	7006.56	7165.75	6670.75	4857.2	5234.56	1876.95	4973.34	6024.83	7217.88	5742.04	6122.11	3339.24	4116.87		3	1	FALSE	0.0001042	0.0001427
High	Unambiguous	[K].lNEIVGNEDTVSR.[L]	N-Term(TMTpro)	1	P35250	P35250	0	2	0.2832	0	1	1	875.47	1749.93	1749.93	1.33	0.00117	CID (Collision Induced Dissociation)	MS2	73.8285	15.4	32.989	68.6329	13910	201015L_YASAM07425_YAII63-12.raw	F4.8	3750.58	3060.24	3402.5	4598.57	2937.91	5110.55	3233.47	4638.68	2209.08	3202.53	4405.42	4855.11	4356.88	4299.91	3926.96	3001.07		3.39	1	FALSE	0.0001042	0.0002638
High	Unambiguous	[K].dTFEHDPSESIDEFNk.[S]	N-Term(TMTpro); K16(TMTpro)	1	Q9NYF8	Q9NYF8	0	3	0.5697	0	1	1	840.079	2518.22	2518.22	0.29	0.00025	CID (Collision Induced Dissociation)	MS2	30.723	33.8	18.539	68.4593	13860	201015L_YASAM07425_YAII63-12.raw	F4.8	8610.17	5811.74	9194.37	8632.94	7810.98	10928.4	9566.82	8226.32	2584.32	6039.09	10114.6	12863.8	9493.88	10320	7754.46	6809.11		4.16	1	FALSE	0.0001042	5.784e-05
High	Unambiguous	[R].gDVGSADIQDLEk.[W]	N-Term(TMTpro); K13(TMTpro)	1	Q9Y5M8	Q9Y5M8	0	2	0.3732	0	1	1	978.032	1955.06	1955.06	-0.4	-0.00039	CID (Collision Induced Dissociation)	MS2	0	23.1	79.187	68.3523	13829	201015L_YASAM07425_YAII63-12.raw	F4.8	5387.18	4121.58	6927.64	6051.74	4628.55	7613.99	7511.78	5887.46	1858.42	4864.02	6152.3	7496.43	5084.91	8135.89	4904.71	4037.6		4.18	1	FALSE	0.0001042	1.282e-05
High	Unambiguous	[R].gEPPLPEEDLSk.[L]	N-Term(TMTpro); K12(TMTpro)	1	O15372	O15372	0	2	0.4259	0	1	1	960.034	1919.06	1919.06	-0.08	-8e-05	CID (Collision Induced Dissociation)	MS2	18.3773	19.9	98.327	68.3062	13815	201015L_YASAM07425_YAII63-12.raw	F4.8	5328.76	3382.56	6214.33	5479.93	4650.68	6131.15	6107.25	4947.43	1854.44	4047.28	3877.47	7442.18	5956.94	6830.62	4199.52	3922.29		2.63	1	FALSE	0.0001042	1.368e-05
High	Unambiguous	[R].sFAGAVSPQEEEEFR.[R]	N-Term(TMTpro)	1	P33992	P33992	0	2	0.5634	0	1	1	993.99	1986.97	1986.97	-0.23	-0.00023	CID (Collision Induced Dissociation)	MS2	0	19	68.155	68.2944	13812	201015L_YASAM07425_YAII63-12.raw	F4.8	5098.99	2972.78	7018.61	4638.79	4723.16	6518.31	5305.16	5633.13	1897.23	4185.15	4782.56	6044.61	3466.44	4466.67	3430.72	3831.29		4.65	1	FALSE	0.0001042	2.06e-05
High	Unambiguous	[K].dQVTAQEIFQDNHEDGPTAk.[K]	N-Term(TMTpro); K20(TMTpro)	1	P13010	P13010	0	4	0.573	0	1	1	713.615	2851.44	2851.44	0.54	0.00038	CID (Collision Induced Dissociation)	MS2	6.90758	12	13.803	68.2837	13809	201015L_YASAM07425_YAII63-12.raw	F4.8	3285.57	1824.51	3233.93	3465.89	1979.82	4454.98	5288.61	3040.71	688.519	2414.3	2390.88	3478.95	3240.17	4590.12	2898.05	1927.71		2.81	1	FALSE	0.0001042	2.109e-05
High	Unambiguous	[R].eTENDDLTNVIQk.[M]	N-Term(TMTpro); K13(TMTpro)	1	O95373	O95373	0	2	0.3857	0	1	1	1064.07	2127.14	2127.14	-0.28	-0.0003	CID (Collision Induced Dissociation)	MS2	18.4537	10.4	119.5	69.0999	14052	201015L_YASAM07425_YAII63-12.raw	F4.8	2736.45	1985.26	3080.37	2620.01	2433.83	3243.89	2914.08	2826.11	1403.65	1515.76	2501.18	3381.4	2717.58	3162	3196.5	2409.55		4.33	1	FALSE	0.0001042	1.041e-05
High	Unambiguous	[K].lYGSAGPPPTGEEDTAEkDEL.[-]	N-Term(TMTpro); K18(TMTpro)	1	P11021	P11021	1	3	0.5901	0	1	1	928.808	2784.41	2784.41	0.43	0.0004	CID (Collision Induced Dissociation)	MS2	48.7363	17.2	61.517	70.221	14378	201015L_YASAM07425_YAII63-12.raw	F4.8	3498.71	3424.6	3890	4872.85	4042.07	5491.06	4738.52	3906.14	1364.55	3416.88	4767.98	6466.66	4438.46	6183.99	4053.9	2910.63		5.05	1	FALSE	0.0001042	3.694e-06
High	Unambiguous	[K].tDMDNQIVVSDYAQMDR.[V]	N-Term(TMTpro)	1	P50991	P50991	0	2	0.7404	0	1	1	1153.04	2305.08	2305.08	-0.21	-0.00024	CID (Collision Induced Dissociation)	MS2	0	7	119.5	70.2421	14385	201015L_YASAM07425_YAII63-12.raw	F4.8	1382.33	1514.88	1790.63	2053.19	1374.53	1869.03	1917.12	1491.34	689.018	1911.63	2783.23	2384.76	1945.06	1436.86	2452.34	1496.4		5.74	1	FALSE	0.0001042	4.401e-07
High	Unambiguous	[R].yLMEEDEDAYk.[K]	N-Term(TMTpro); K11(TMTpro)	1	P46777	P46777	0	2	0.6253	0	1	1	1007.5	2014	2014	-0.16	-0.00016	CID (Collision Induced Dissociation)	MS2	14.9531	18.4	67.012	70.2851	14396	201015L_YASAM07425_YAII63-12.raw	F4.8	4395.61	2904.59	5158.12	5509.92	3742.02	5990.18	7010.65	5366.19	1906.43	3520.07	3790.49	7272.29	4627.35	6064.27	4796.48	3411.52		3.87	1	FALSE	0.0001042	4.165e-05
High	Unambiguous	[K].dDANNDPQWSEEQLIAAk.[F]	N-Term(TMTpro); K18(TMTpro)	1	P22234	P22234	0	2	0.7114	0	1	1	1326.67	2652.34	2652.34	1	0.00132	CID (Collision Induced Dissociation)	MS2	0	5.9	119.5	72.0066	14848	201015L_YASAM07425_YAII63-12.raw	F4.8	712.645	714.375	1326.11	2303.4	1518.9	1823.39	2098.78	1467.08	610.541		1719.77	2429.3	1508.43	2120.26	1998.11	1203.87		6.03	1	FALSE	0.0001042	5.894e-06
High	Unambiguous	[K].eSEDFIVEQYk.[H]	N-Term(TMTpro); K11(TMTpro)	1	Q14566	Q14566	0	2	0.474	0	1	1	998.032	1995.06	1995.06	-0.16	-0.00016	CID (Collision Induced Dissociation)	MS2	39.5211	23.8	119.5	71.9818	14842	201015L_YASAM07425_YAII63-12.raw	F4.8	3556.11	2882.23	6764.03	5267.47	4816.19	7640.33	14698.4	5878.32	1916.03	4442.3	7615.61	8079.14	4539.12	7327.49	5420.23	3899.47		3.46	1	FALSE	0.0001042	0.0001882
High	Unambiguous	[R].lQAALDDEEAGGRPAMEPGNGSLDLGGDSAGR.[S]	N-Term(TMTpro)	1	Q00839	Q00839	0	4	0.8218	0	1	1	858.419	3430.65	3430.65	2.2	0.00189	CID (Collision Induced Dissociation)	MS2	5.63567	14	40.702	71.9709	14839	201015L_YASAM07425_YAII63-12.raw	F4.8	3123.58	2948.38	4525.07	3755.64	2830.19	3783.14	4355.39	3216.11	1447.5	3778.71	3707.39	3416.32	3157.18	4758.01	4432.41	1933.34		6.06	1	FALSE	0.0001042	1.693e-09
High	Unambiguous	[K].eTVYcLNDDDETEVLk.[E]	N-Term(TMTpro); C5(Carbamidomethyl); K16(TMTpro)	1	P13010	P13010	0	2	0.5645	0	1	1	1276.14	2551.27	2551.27	0.6	0.00077	CID (Collision Induced Dissociation)	MS2	0	8.3	119.5	71.9668	14838	201015L_YASAM07425_YAII63-12.raw	F4.8	2149.24	941.434	2466.72	2401.99	1315.41	3635.02	2727.1	2902.81		1478.65	2051.27	2608.02	2142.49	2835.09	2452.22	1544.01		6.82	1	FALSE	0.0001042	1.47e-06
High	Unambiguous	[K].vQALEEANNDLENk.[I]	N-Term(TMTpro); K14(TMTpro)	4	P35527	547748; 1890020; 1082558; P35527	0	2	0.5408	0	1	1	1098.09	2195.18	2195.18	0.13	0.00014	CID (Collision Induced Dissociation)	MS2	0	12.9	119.5	71.9299	14829	201015L_YASAM07425_YAII63-12.raw	F4.8	2279.79	3472.55	4420.52	3992.25	2029.99	2791.59	2377.15	3113.39		2648.57	7379.64	8005.89	3215.5	4209.6	2932.11	1068.55		5.88	1	TRUE	0.0001042	8.349e-07
High	Unambiguous	[R].iLGADTSVDLEETGR.[V]	N-Term(TMTpro)	1	P25705	P25705	0	2	0.5361	0	1	1	940.502	1880	1879.99	1.95	0.00184	CID (Collision Induced Dissociation)	MS2	19.994	35.3	53.485	71.9183	14826	201015L_YASAM07425_YAII63-12.raw	F4.8	7953.5	8542.55	8888.58	9885.95	7123.89	10876.9	9399.7	7880.11	2765.5	6811.18	10177.7	11220	8959.57	11154.7	8693.43	8409.14		4.16	1	FALSE	0.0001042	7.864e-06
High	Unambiguous	[K].eALTYDGALLGDR.[S]	N-Term(TMTpro)	1	Q15056	Q15056	0	2	0.5	0	1	1	849.455	1697.9	1697.9	-0.17	-0.00015	CID (Collision Induced Dissociation)	MS2	8.14889	39.2	24.875	72.0753	14863	201015L_YASAM07425_YAII63-12.raw	F4.8	9170.44	9480.39	11408.9	11889.4	9273.92	11027.6	9733.45	9010.39	4201.49	8369.19	10596.7	12122.6	11144.1	12359.9	7493.51	7180.65		3.46	1	FALSE	0.0001042	0.0001353
High	Unambiguous	[K].gYAYVEFENPDEAEk.[A]	N-Term(TMTpro); K15(TMTpro)	1	Q15287	Q15287	0	2	0.6698	0	1	1	1185.09	2369.18	2369.18	0.5	0.0006	CID (Collision Induced Dissociation)	MS2	0	8.3	119.5	71.8883	14819	201015L_YASAM07425_YAII63-12.raw	F4.8	1999.81	1100.24	2389.66	2282.67	1965.28	2324.77	2288.5	1869.11	810.41	1455.43	2647.31	3849.89	2625.06	2308.05	2451.66	1013.6		6.45	1	FALSE	0.0001042	2.431e-08
High	Unambiguous	[R].lQAALDDEEAGGRPAMEPGNGSLDLGGDSAGR.[S]	N-Term(TMTpro)	1	Q00839	Q00839	0	3	0.5936	0	1	1	1144.22	3430.65	3430.65	0.66	0.00075	CID (Collision Induced Dissociation)	MS2	24.0677	5.7	119.5	71.8141	14804	201015L_YASAM07425_YAII63-12.raw	F4.8	2076.7	1523.28	1062.48	1369.12	1281.32	1149.28	1754.62	2054.53		1772.28	1875.2	1538.1	1416.5	1352.7	2340.74	943.387		4.7	1	FALSE	0.0001042	1.141e-05
High	Unambiguous	[K].lEVEANNAFDQYR.[D]	N-Term(TMTpro)	1	P47756	P47756	0	2	0.471	0	1	1	936.974	1872.94	1872.94	-0.21	-0.00019	CID (Collision Induced Dissociation)	MS2	11.7666	20.4	83.599	71.691	14779	201015L_YASAM07425_YAII63-12.raw	F4.8	4488.09	4701.77	4036.54	5672.97	4665.62	6700.81	6476.83	5084.46	1696.54	4929.55	7039.6	8076.02	5271.32	6521.42	3435.39	4304.42		3.97	1	FALSE	0.0001042	5.592e-05
High	Unambiguous	[R].sIQEAPVSEDLVIR.[L]	N-Term(TMTpro)	1	Q5JTV8	Q5JTV8	0	2	0.5111	0	1	1	930.523	1860.04	1860.04	-0.41	-0.00038	CID (Collision Induced Dissociation)	MS2	8.07129	21.2	74.307	71.66	14773	201015L_YASAM07425_YAII63-12.raw	F4.8	5970.7	6218.29	5430.71	5489.35	4916.46	5759.98	5688.32	4915.4	2534.63	5529.01	5636	5097.01	6199.87	6882.03	5095.07	4424.37		4.05	1	FALSE	0.0001042	0.0001101
High	Unambiguous	[K].iEGYEDQVLITEHGDLGNSR.[F]	N-Term(TMTpro)	1	P52907	P52907	0	3	0.6687	0	1	1	850.432	2549.28	2549.28	0.68	0.00058	CID (Collision Induced Dissociation)	MS2	0	9	40.999	71.6528	14770	201015L_YASAM07425_YAII63-12.raw	F4.8	2090.39	2142.93	2286.84	2790.69	1826.77	2651.34	3002.36	2762.94		1929.76	2066.01	3208.61	3051.95	2849.34	2646.58	1291.26		6.7	1	FALSE	0.0001042	7.931e-09
High	Unambiguous	[K].sLEDQVEMLR.[T]	N-Term(TMTpro)	1	P14314	P14314	0	2	0.3798	0	1	1	762.406	1523.81	1523.81	-0.42	-0.00032	CID (Collision Induced Dissociation)	MS2	22.3535	13.3	19.713	71.6153	14758	201015L_YASAM07425_YAII63-12.raw	F4.8	3219.78	1248.75	4060.32	2896.01	3146.81	4054.76	5069.56	2663.37	2037.95	3352.63	4351.03	3757.77	3542.57	3478.26	2896.99	2628.64		3.37	1	FALSE	0.0001042	0.0001081
High	Unambiguous	[R].qSGEAFVELGSEDDVk.[M]	N-Term(TMTpro); K16(TMTpro)	1	P52597	P52597	0	2	0.6146	0	1	1	1159.6	2318.2	2318.2	0.73	0.00085	CID (Collision Induced Dissociation)	MS2	0	8.4	72.56	71.604	14755	201015L_YASAM07425_YAII63-12.raw	F4.8	2153.14	1769.69	2328.57	1489.19	1223.57	2841.93	2051.38	1312.85		1202.89	4486.86	3719.04	2189.25	2446.95	2942.13	1150.78		6.02	1	FALSE	0.0001042	1.625e-07
High	Unambiguous	[K].vQALEEANNDLENk.[I]	N-Term(TMTpro); K14(TMTpro)	4	P35527	547748; 1890020; 1082558; P35527	0	3	0.529	0	1	1	732.399	2195.18	2195.18	1.46	0.00106	CID (Collision Induced Dissociation)	MS2	11.9258	6.2	29.934	71.8706	14815	201015L_YASAM07425_YAII63-12.raw	F4.8	1235.72	1448.88	2967.09	2252.48	1379.56	1486.84	1499.85	1365.55		1107.64	3023.3	3090.06	1109.36	1691.78	1279.46			4.65	1	TRUE	0.0001042	1.651e-08
High	Unambiguous	[K].dDANNDPQWSEEQLIAAk.[F]	N-Term(TMTpro); K18(TMTpro)	1	P22234	P22234	0	3	0.6204	0	1	1	884.785	2652.34	2652.34	0.6	0.00053	CID (Collision Induced Dissociation)	MS2	3.57852	28.4	37.81	72.0795	14864	201015L_YASAM07425_YAII63-12.raw	F4.8	6701.21	4702.7	8684.71	6034.1	5666.72	10837.1	11558.2	6122.11	1401.35	4221.22	8460	11652.6	7168.6	11177	7731.41	3913.52		3.53	1	FALSE	0.0001042	2.114e-06
High	Unambiguous	[R].eITENLMATGDLDQDGR.[I]	N-Term(TMTpro)	1	P13796	P13796	0	2	0.7121	0	1	1	1091.54	2182.06	2182.06	0.5	0.00055	CID (Collision Induced Dissociation)	MS2	0	7.4	73.13	72.151	14883	201015L_YASAM07425_YAII63-12.raw	F4.8	2152.74	1674.19	2201.76	1279.35	1465.63	2149.09	1431.01	2299.08	1088.18	1804.79	2306.15	2085.43	2156.88	1936.29	2338.27	1724.67		6.39	1	FALSE	0.0001042	1.286e-08
High	Unambiguous	[K].gVVPLAGTDGETTTQGLDGLSER.[C]	N-Term(TMTpro)	1	P09972	P09972	0	2	0.7748	0	1	1	1289.17	2577.33	2577.33	-0.05	-7e-05	CID (Collision Induced Dissociation)	MS2	0	4.9	119.5	72.238	14904	201015L_YASAM07425_YAII63-12.raw	F4.8	1421.18	772.767	1857.67	1352.2	1057.84	1316.84	1300.69	1247.31	848.029	1332.92	1475.26	1700.24	1216.59	2019.8	750.789	911.935		4.93	1	FALSE	0.0001042	4.663e-08
High	Unambiguous	[K].lEEEQIILEDQNck.[L]	N-Term(TMTpro); C13(Carbamidomethyl); K14(TMTpro)	1	P35579	P35579	0	3	0.5773	0	1	1	790.422	2369.25	2369.25	0.56	0.00044	CID (Collision Induced Dissociation)	MS2	11.8972	16	21.253	73.0034	15083	201015L_YASAM07425_YAII63-12.raw	F4.8	3323.14	3211.85	4491.83	4736.84	4016.2	5849.23	5361.46	5084.2	1439.08	2650.09	3886.83	6753.61	2962.23	5379.89	4765.63	2354.37		4.66	1	FALSE	0.0001042	1.473e-07
High	Unambiguous	[K].lEEEQIILEDQNck.[L]	N-Term(TMTpro); C13(Carbamidomethyl); K14(TMTpro)	1	P35579	P35579	0	2	0.5714	0	1	1	1185.13	2369.25	2369.25	1.08	0.00128	CID (Collision Induced Dissociation)	MS2	5.15942	11.1	119.5	72.9398	15068	201015L_YASAM07425_YAII63-12.raw	F4.8	3364.37	2038.24	2388.79	2584.69	2966.64	3783.06	3554.34	3051.67		1384.46	3096.29	2944.09	4134.63	3459.45	2797.09	1489.12		6.16	1	FALSE	0.0001042	4.674e-07
High	Unambiguous	[R].sVGDGETVEFDVVEGEk.[G]	N-Term(TMTpro); K17(TMTpro)	3	P16989; P67809	P16989; Q9Y2T7; P67809	0	3	0.6092	0	1	1	802.085	2404.24	2404.24	0.94	0.00075	CID (Collision Induced Dissociation)	MS2	0	12.9	41.044	72.8966	15056	201015L_YASAM07425_YAII63-12.raw	F4.8	2980.2	2374.52	3810.17	3188.39	2796.67	4931.67	4711.7	2490.75		2308.48	3567.57	4052.16	3856.48	4638.4	3698.32	1657.38		4.12	2	FALSE	0.0001042	4.663e-08
High	Unambiguous	[R].sVGDGETVEFDVVEGEk.[G]	N-Term(TMTpro); K17(TMTpro)	3	P16989; P67809	P16989; Q9Y2T7; P67809	0	2	0.6752	0	1	1	1202.62	2404.24	2404.24	0.44	0.00053	CID (Collision Induced Dissociation)	MS2	0	7.4	119.5	72.8816	15052	201015L_YASAM07425_YAII63-12.raw	F4.8	1366.44	1756.82	2274.31	2536.12	2253.28	2477.61	3128.72	1312.97		1086.3	2067.29	1844.61	1236.06	1938	1777.18	1627.44		6.22	2	FALSE	0.0001042	5.739e-08
High	Unambiguous	[R].gVVDSEDLPLNISR.[E]	N-Term(TMTpro)	2	P07900; P08238	P07900; P08238	0	2	0	0	1	1	909.501	1817.99	1817.99	0.63	0.00057	CID (Collision Induced Dissociation)	MS2	16.6203	21.2	99.248	72.6014	14987	201015L_YASAM07425_YAII63-12.raw	F4.8	4662.88	4512.09	5362.43	5351.65	5199.35	7621.3	6240.77	5171.64	2416.5	5106.32	5255.01	5813.74	5555.71	5748.69	5972.05	3975.93		3.04	2	FALSE	0.0001042	0.0002513
High	Unambiguous	[K].qQLSAEELDAQLDAYNAR.[M]	N-Term(TMTpro)	1	Q86V81	Q86V81	0	2	0.7054	0	1	1	1170.09	2339.18	2339.18	1	0.00117	CID (Collision Induced Dissociation)	MS2	0	7.9	72.47	72.5638	14980	201015L_YASAM07425_YAII63-12.raw	F4.8	3038.13	2275.48	2413	1474.6	1766.47	1959.05	1726.76	1381.79	1048.71	1648.2	2999.2	2068.63	2014.63	3056.8	2191.99	1345.97		6.79	1	FALSE	0.0001042	9.036e-08
High	Unambiguous	[K].eLEASEELDTIcPk.[A]	N-Term(TMTpro); C12(Carbamidomethyl); K14(TMTpro)	1	O76003	O76003	0	2	0.5643	0	1	1	1121.59	2242.17	2242.18	-2.73	-0.00307	CID (Collision Induced Dissociation)	MS2	42.4586	8.1	119.5	72.5551	14977	201015L_YASAM07425_YAII63-12.raw	F4.8	2687.07	769.076	2286.51	1508.93	1898.76	2867.94	3037.17	2392.86	650.26	1033.21	1943.99	2642.97	2539.45	2806.53	1173.05	1866.74		4.43	1	FALSE	0.0001042	1.559e-06
High	Unambiguous	[K].nYTDEAIETDDLTIk.[L]	N-Term(TMTpro); K15(TMTpro)	1	O14818	O14818	0	2	0.664	0	1	1	1175.12	2349.23	2349.23	-0.82	-0.00096	CID (Collision Induced Dissociation)	MS2	0	10	119.5	72.5359	14972	201015L_YASAM07425_YAII63-12.raw	F4.8	2294.68	586.771	2447.88	2829.36	1936.5	3224.74	2739.9	2229.99	1007.75	2560.83	2959.26	3818.43	2684.65	2778	3165.43	1237.26		6.31	1	FALSE	0.0001042	1.257e-08
High	Unambiguous	[K].vEEAEPEEFVVEk.[V]	N-Term(TMTpro); K13(TMTpro)	1	Q13185	Q13185	0	2	0.5218	0	1	1	1071.58	2142.15	2142.15	0.62	0.00066	CID (Collision Induced Dissociation)	MS2	0	12.5	119.5	72.5239	14969	201015L_YASAM07425_YAII63-12.raw	F4.8	2461.9	2627.15	2879.01	2949.89	2414.63	5049.17	4974.02	3051.64	709.696	1458.12	3216.87	4558.25	3972.91	3986.04	3453.37	2114.48		5.04	1	FALSE	0.0001042	2.022e-06
High	Unambiguous	[K].eLEASEELDTIcPk.[A]	N-Term(TMTpro); C12(Carbamidomethyl); K14(TMTpro)	1	O76003	O76003	0	2	0.5434	0	1	1	1121.59	2242.17	2242.18	-1.86	-0.00209	CID (Collision Induced Dissociation)	MS2	13.5276	8.7	119.5	72.4748	14959	201015L_YASAM07425_YAII63-12.raw	F4.8	2110.92	1458.83	2691.71	2012.83	970.689	3686.33	3237.97	2430.07		1819.54	2255.38	2628.74	1455	3081.61	2608.64	1510.44		4.49	1	FALSE	0.0001042	3.847e-06
High	Unambiguous	[R].sGLELEPEEPPGWR.[E]	N-Term(TMTpro)	1	Q92888	Q92888	0	2	0.5094	0	1	1	950.492	1899.98	1899.98	0.16	0.00015	CID (Collision Induced Dissociation)	MS2	11.4245	16.4	112.214	72.4275	14948	201015L_YASAM07425_YAII63-12.raw	F4.8	3820.85	3492.31	5264.59	4056.18	4297.06	6232.29	5528.03	5055.38	1982.83	4691.47	3608.89	5443.37	3522.31	4058.23	2547.19	3237.42		4.26	1	FALSE	0.0001042	5.465e-05
High	Unambiguous	[K].dRPQEADGIDSVIVVDNVPQVGPDR.[L]	N-Term(TMTpro)	1	P55884	P55884	0	3	0.6418	0	1	1	998.853	2994.54	2994.55	-0.09	-9e-05	CID (Collision Induced Dissociation)	MS2	0	10.2	101.167	72.3769	14939	201015L_YASAM07425_YAII63-12.raw	F4.8	2522.99	1159.25	3183.7	2671.32	2883.96	2396.45	5416.46	2917.83	968.792	1973.85	3113.42	2789	2050.81	2163.14	2115.16	1926.71		6.03	1	FALSE	0.0001042	4.191e-06
High	Unambiguous	[K].sEEWADNHLPLTDAELAR.[I]	N-Term(TMTpro)	1	O60664	O60664	0	3	0.6785	0	1	1	791.066	2371.18	2371.18	-0.34	-0.00027	CID (Collision Induced Dissociation)	MS2	5.54693	7.9	41.952	72.3657	14936	201015L_YASAM07425_YAII63-12.raw	F4.8	2348.6	1978.19	2359.88	2459.78	1918.3	2547.39	2423.5	2291.72	763.23	2186.43	2325.37	2790.01	1809.09	2808.06	1933.82	1627.23		3.39	1	FALSE	0.0001042	3.264e-06
High	Unambiguous	[K].vEDVSAVEIVGGATR.[I]	N-Term(TMTpro)	1	Q92598	Q92598	0	2	0.2474	0	1	1	903.5	1805.99	1805.99	-0.11	-0.0001	CID (Collision Induced Dissociation)	MS2	7.2938	13.4	81.83	72.3363	14929	201015L_YASAM07425_YAII63-12.raw	F4.8	2917.44	2445.61	3820.8	2894.24	3147.82	4439.45	3681.44	3344.41	1923.51	2724.21	3557.48	3467.47	3608.53	4475.45	3715.27	3440.99		2.87	1	FALSE	0.0001042	1.742e-05
High	Unambiguous	[K].gVVPLAGTDGETTTQGLDGLSER.[C]	N-Term(TMTpro)	1	P09972	P09972	0	3	0.6982	0	1	1	859.782	2577.33	2577.33	-0.37	-0.00031	CID (Collision Induced Dissociation)	MS2	10.3206	13	27.846	72.2929	14918	201015L_YASAM07425_YAII63-12.raw	F4.8	3489.69	2122.1	4130.62	3864.18	3513.58	3651.41	3261.21	3614.51	1636.01	2608.65	4131.2	4741.11	3885.67	3561.99	2718.39	2184.93		6.76	1	FALSE	0.0001042	5.205e-07
High	Unambiguous	[R].aWDQEAEGAGPELGLR.[V]	N-Term(TMTpro)	1	Q8IZ83	Q8IZ83	0	2	0.6142	0	1	1	1002.01	2003.02	2003.02	0.6	0.0006	CID (Collision Induced Dissociation)	MS2	0	12.7	119.5	71.6006	14754	201015L_YASAM07425_YAII63-12.raw	F4.8	2732.43	3493.81	3490.56	2510.59	2485.33	5286.17	3180.47	2752.49	890.73	3300.03	3485.25	3636.54	3633.27	3227.06	2969.99	2543.29		3.94	1	FALSE	0.0001042	2.904e-06
High	Unambiguous	[K].vIEEQLEPAVEk.[I]	N-Term(TMTpro); K12(TMTpro)	1	P42704	P42704	0	2	0.4439	0	1	1	996.579	1992.15	1992.15	-0.34	-0.00034	CID (Collision Induced Dissociation)	MS2	18.9155	18.9	108.788	71.58	14747	201015L_YASAM07425_YAII63-12.raw	F4.8	3431.39	4298.82	5633.86	4517.95	4805.73	6741.47	8927.7	4385.54	1963.47	4101.89	4530.82	6979.8	4853.48	6981.39	4318.88	2577.99		4.19	1	FALSE	0.0001042	2.645e-05
High	Unambiguous	[K].nLSSNEAISLEEIR.[I]	N-Term(TMTpro)	1	P78527	P78527	0	2	0.4447	0	1	1	940.009	1879.01	1879.01	0.53	0.0005	CID (Collision Induced Dissociation)	MS2	15.649	43.2	44.126	71.5128	14726	201015L_YASAM07425_YAII63-12.raw	F4.8	11295.6	10045	11661.6	13042.5	9355.55	11235.9	10963.8	9109.99	5203.51	12541.5	12664.1	11210.4	11439.8	14409.8	10471.5	10378.6		4.43	1	FALSE	0.0001042	1.056e-05
High	Unambiguous	[K].dNFTLIPEGTNGTEER.[M]	N-Term(TMTpro)	1	Q16555	Q16555	0	2	0.5622	0	1	1	1049.02	2097.04	2097.04	-0.65	-0.00068	CID (Collision Induced Dissociation)	MS2	0	8.6	119.5	71.4968	14721	201015L_YASAM07425_YAII63-12.raw	F4.8	2073.08	1187.12	1949.56	2092.06	2482.71	2608.82	2220.02	2355.17	866.099	2149.85	2997.94	3029.03	2399.36	2327.43	2758.32	1148.16		4.98	1	FALSE	0.0001042	5.408e-06
High	Unambiguous	[K].tGTAEMSSILEER.[I]	N-Term(TMTpro)	1	P25705	P25705	0	2	0.463	0	1	1	864.444	1727.88	1727.88	0.53	0.00046	CID (Collision Induced Dissociation)	MS2	0	16.3	55.56	70.6028	14490	201015L_YASAM07425_YAII63-12.raw	F4.8	3044.34	4103.35	4141.85	4341.17	3512.71	5734.26	3963.65	4194.72	1894.57	3565.89	4650.14	5593.51	5969.61	5082.43	4706.82	2968.45		3.78	1	FALSE	0.0001042	7.178e-06
High	Unambiguous	[K].vAVGELTDEDVk.[M]	N-Term(TMTpro); K12(TMTpro)	1	P49736	P49736	0	2	0.458	0	1	1	942.036	1883.06	1883.06	1.08	0.00102	CID (Collision Induced Dissociation)	MS2	15.6284	30.5	86.189	70.5665	14482	201015L_YASAM07425_YAII63-12.raw	F4.8	6998.34	5765.52	8032.84	7471.7	5677.18	11038.3	12763.4	6189.82	1944.3	5581.01	8550.95	11538.7	7913.77	11885.3	8232.74	5875.46		4.17	1	FALSE	0.0001042	8.172e-06
High	Unambiguous	[K].gTGVVTSVPSDSPDDIAALR.[D]	N-Term(TMTpro)	1	Q9P2J5	Q9P2J5	0	2	0.6445	0	1	1	1131.1	2261.19	2261.19	0.09	0.0001	CID (Collision Induced Dissociation)	MS2	0	6.2	119.5	70.5017	14463	201015L_YASAM07425_YAII63-12.raw	F4.8	1379.21	1356.46	1322.74	1414.04	1515.56	2225.98	1285.75	1389.12	1007.99	1669.4	1519.78	1875.37	1982.6	1405.88	1809.37	1703.49		6.02	1	FALSE	0.0001042	1.854e-08
High	Unambiguous	[K].lYGSAGPPPTGEEDTAEkDEL.[-]	N-Term(TMTpro); K18(TMTpro)	1	P11021	P11021	1	2	0.6881	0	1	1	1392.71	2784.41	2784.41	0.59	0.00082	CID (Collision Induced Dissociation)	MS2	0	6.9	119.5	70.4637	14452	201015L_YASAM07425_YAII63-12.raw	F4.8	2242.56	1113.77	1517.11	1296.12	1624.49	2439.94	2380.87	1743.95		1043.44	1681.85	2652.46	1518.88	2764.78	2350	1397.57		5.45	1	FALSE	0.0001042	8.673e-06
High	Unambiguous	[K].hGYIGEFEIIDDHR.[A]	N-Term(TMTpro)	1	P62244	P62244	0	2	0.6106	0	1	1	1003.01	2005.01	2005.01	-1.06	-0.00106	CID (Collision Induced Dissociation)	MS2	29.0734	16.7	73.85	70.4525	14449	201015L_YASAM07425_YAII63-12.raw	F4.8	2996.18	3256.21	5431.08	5239.35	4115.07	5008.33	5201.57	4945.51	1729.28	3916.27	5277.44	5637.98	4560.53	5114.44	2967.23	3240.04		4.34	1	FALSE	0.0001042	7.983e-07
High	Unambiguous	[K].dSDEADLVLAk.[E]	N-Term(TMTpro); K11(TMTpro)	1	Q13185	Q13185	0	2	0.4714	0	1	1	892.5	1783.99	1783.99	0.22	0.00019	CID (Collision Induced Dissociation)	MS2	28.2949	20.4	119.5	70.4436	14446	201015L_YASAM07425_YAII63-12.raw	F4.8	5490.33	2769.51	6724.98	4290.51	3743.87	7710.93	8474.6	5385.65	1935.03	3610.29	4199.14	6877.04	4925.28	6910.73	4269.15	3259.19		3.67	1	FALSE	0.0001042	0.0001796
High	Unambiguous	[R].yLMEEDEDAYk.[K]	N-Term(TMTpro); K11(TMTpro)	1	P46777	P46777	0	3	0.444	0	1	1	672.005	2014	2014	1.5	0.00101	CID (Collision Induced Dissociation)	MS2	47.6318	9.2	36.106	70.4323	14442	201015L_YASAM07425_YAII63-12.raw	F4.8	2420.58	1711.43	3118.52	3249.6	1372.23	2856.15	4308.41	2093.9	797.448	1379.31	2470.8	4395.46	2415.14	2608.28	2002.5	978.529		2.68	1	FALSE	0.0001042	5.681e-05
High	Unambiguous	[R].vLTEDEMGHPEIGDAIAR.[L]	N-Term(TMTpro)	1	P14324	P14324	0	3	0.537	0	1	1	753.054	2257.15	2257.15	1.59	0.0012	CID (Collision Induced Dissociation)	MS2	16.3826	10.9	26.759	70.4217	14439	201015L_YASAM07425_YAII63-12.raw	F4.8	2959.87	3238.02	3362.48	2773.99	2548.06	3323.55	3359.53	2343.85	1102.79	3362.82	2220.52	2951.47	3351.71	3193.65	4132.05	3329.12		3.65	1	FALSE	0.0001042	5.997e-06
High	Unambiguous	[K].hGYIGEFEIIDDHR.[A]	N-Term(TMTpro)	1	P62244	P62244	0	3	0.6386	0	1	1	669.01	2005.02	2005.01	2.62	0.00175	CID (Collision Induced Dissociation)	MS2	0	2.8	23.56	70.4186	14438	201015L_YASAM07425_YAII63-12.raw	F4.8	1387.22		692.661	708.163	533.565	1033.46	1033.6	1011.96	652.461	819.407		1129.61	704.158	794.011	1279.88			5.34	1	FALSE	0.0001042	5.509e-09
High	Unambiguous	[K].lVQDVANNTNEEAGDGTTTATVLAR.[S]	N-Term(TMTpro)	1	P10809	P10809	0	4	0.2881	0	1	1	716.873	2864.47	2864.46	4.44	0.00318	CID (Collision Induced Dissociation)	MS2	6.53202	6.1	27.209	70.4147	14436	201015L_YASAM07425_YAII63-12.raw	F4.8	1235.18	1470.5	2050.96	2322.84	1849.66	830.548	1366.3	1483.59	883.38	979.807	2058.28	2406.08	1475.25	1617.58	1788.57	1122.47		2.95	1	FALSE	0.0001042	0.000173
High	Unambiguous	[K].lAEAQIEELR.[Q]	N-Term(TMTpro)	1	Q9NR28	Q9NR28	0	2	0.3068	0	1	1	738.423	1475.84	1475.84	-0.05	-4e-05	CID (Collision Induced Dissociation)	MS2	28.2749	13.7	17.34	70.3763	14424	201015L_YASAM07425_YAII63-12.raw	F4.8	3362.6	2226.1	4242.23	3734	3084.09	3997.56	4315.5	4253.41	1437.19	2941.18	3810.02	4808.86	3051.05	3949.44	3818.6	2131.47		3.65	1	FALSE	0.0001042	0.0001251
High	Unambiguous	[R].aMNVLTEAEER.[Y]	N-Term(TMTpro)	1	O95347	O95347	0	2	0.3272	0	1	1	783.91	1566.81	1566.81	0.56	0.00044	CID (Collision Induced Dissociation)	MS2	0	11.6	50.295	70.3383	14413	201015L_YASAM07425_YAII63-12.raw	F4.8	3075.27	2671.29	3314.89	3597.69	2733.8	3431.56	3425.34	2980.53	1124.72	3775.14	2790.15	3084.78	3309.87	3239.88	2635.64	2509.01		3.79	1	FALSE	0.0001042	2.258e-05
High	Unambiguous	[K].hGYIGEFEIIDDHR.[A]	N-Term(TMTpro)	1	P62244	P62244	0	4	0.7481	0	1	1	502.009	2005.01	2005.01	1.85	0.00093	CID (Collision Induced Dissociation)	MS2	33.8511		34.395	70.3356	14412	201015L_YASAM07425_YAII63-12.raw	F4.8																		5.32	1	FALSE	0.0001042	1.429e-08
High	Unambiguous	[R].aVFDETYPDPVR.[V]	N-Term(TMTpro)	1	P49588	P49588	0	2	0.4435	0	1	1	856.944	1712.88	1712.88	-0.61	-0.00052	CID (Collision Induced Dissociation)	MS2	37.0038	18.5	46.863	70.3124	14405	201015L_YASAM07425_YAII63-12.raw	F4.8	4224.68	3898.74	5343.51	5208.67	3445.37	5634.17	5591.17	4556.31	1826.1	3821.72	5351.5	5689.08	5568.98	7062.17	4721.96	4065.6		2.48	1	FALSE	0.0001042	0.0003341
High	Unambiguous	[K].gVVDSDDLPLNVSR.[E]	N-Term(TMTpro)	1	P14625	P14625	0	2	0.4773	0	1	1	895.485	1789.96	1789.96	1.21	0.00108	CID (Collision Induced Dissociation)	MS2	76.7882	29.3	29.297	70.2938	14398	201015L_YASAM07425_YAII63-12.raw	F4.8	6433.77	5896.4	7381.05	9019.25	5888.18	7591.63	8514.83	6990.11	3948.5	8016.75	7384.59	9666.33	8754.4	8934.28	7408.73	6215.42		3.08	1	FALSE	0.0001042	0.0002527
High	Unambiguous	[K].eTIPLQETSLYTQDR.[L]	N-Term(TMTpro)	1	P50897	P50897	0	2	0.4634	0	1	1	1049.55	2098.1	2098.1	-0.14	-0.00015	CID (Collision Induced Dissociation)	MS2	18.8044	11.1	119.5	70.663	14502	201015L_YASAM07425_YAII63-12.raw	F4.8	1705.16	2614.03	2585.87	3697.82	2201.48	3794.51	3781.98	2594.21	1242.31	2255.45	3649.07	3522.12	3658.54	2263.27	2576.14	1893.46		3.82	1	FALSE	0.0001042	5.576e-07
High	Unambiguous	[R].aLEESNYELEGk.[I]	N-Term(TMTpro); K12(TMTpro)	7	P13645	119581085; P13645; P13645; 88041; 547749; 88042; 71528	0	2	0.6127	0	1	1	995.534	1990.06	1990.06	-0.44	-0.00044	CID (Collision Induced Dissociation)	MS2	25.1636	44.9	41.392	67.7529	13636	201015L_YASAM07425_YAII63-12.raw	F4.8	8494.35	7935.03	17487	17844.9	9663.29	9057	12776.1	7882.42	2693.33	7104.23	14022.2	18843.1	10981.6	19886.3	8612.43	4302.24		4.57	1	TRUE	0.0001042	2.507e-05
High	Unambiguous	[K].sLYDEVAAQGEVVR.[K]	N-Term(TMTpro)	1	P07814	P07814	0	2	0.5504	0	1	1	920.493	1839.98	1839.98	0.57	0.00052	CID (Collision Induced Dissociation)	MS2	21.6376	24.1	78.026	70.7778	14534	201015L_YASAM07425_YAII63-12.raw	F4.8	6224.5	4747.85	6593.24	6039.42	5088.77	7733.35	6098.45	5984.78	2913.37	5438.38	6329.04	7089.5	7344.35	6356.51	5601.83	5101.73		4.07	1	FALSE	0.0001042	1.655e-05
High	Unambiguous	[R].nPDDITNEEYGEFYk.[S]	N-Term(TMTpro); K15(TMTpro)	1	P07900	P07900	0	2	0.6537	0	1	1	1221.6	2442.19	2442.2	-1.02	-0.00125	CID (Collision Induced Dissociation)	MS2	0	10.3	72.05	70.9359	14575	201015L_YASAM07425_YAII63-12.raw	F4.8	2319.9	2176.12	2498.47	2114.57	2089.04	4085.92	3676.76	1797.56	768.602	2222.58	1795.23	3763.44	2518.41	4356.57	2145.31	1712.67		6.15	1	FALSE	0.0001042	2.045e-07
High	Unambiguous	[K].iWSTVPTDEEDEMEESTNRPR.[K]	N-Term(TMTpro)	1	Q9GZL7	Q9GZL7	0	3	0.6291	0	1	1	942.446	2825.32	2825.32	0.73	0.00069	CID (Collision Induced Dissociation)	MS2	13.5367	17.4	58.993	71.4847	14717	201015L_YASAM07425_YAII63-12.raw	F4.8	3894	4335.63	5907.44	4484.2	3444.56	5874.81	5161.5	3810.05	1989.61	3570.62	5319.85	5295.22	4352.68	5333.81	4844.94	3677.2		4.61	1	FALSE	0.0001042	6.71e-05
High	Unambiguous	[R].gLGLDDALEPR.[Q]	N-Term(TMTpro)	1	Q9Y230	Q9Y230	0	2	0.5908	0	1	1	730.408	1459.81	1459.81	0.73	0.00053	CID (Collision Induced Dissociation)	MS2	15.4268	10.4	57.088	71.3906	14696	201015L_YASAM07425_YAII63-12.raw	F4.8	1963.15	2027.93	2508.8	2951.39	2671.17	2575.66	3142.14	2545.6	1787.45	2793.66	2635.05	2925.74	1921.77	3738.64	2296.83	2364.25		3.03	1	FALSE	0.0001042	5.534e-05
High	Unambiguous	[R].dYTYEELLNR.[V]	N-Term(TMTpro)	1	P20042	P20042	0	2	0.5168	0	1	1	810.416	1619.82	1619.82	0.33	0.00026	CID (Collision Induced Dissociation)	MS2	15.1315	14.6	53.413	71.3796	14693	201015L_YASAM07425_YAII63-12.raw	F4.8	3791.62	3252.97	2957.38	4341.09	3642.93	3652.48	3276.33	3809.19	1890.73	3511.35	3945.64	4807.31	3779.69	4010.42	2869.46	3496.13		2.98	1	FALSE	0.0001042	0.0002225
High	Unambiguous	[R].nPDDITQEEYGEFYk.[S]	N-Term(TMTpro); K15(TMTpro)	1	P08238	P08238	0	3	0.5828	0	1	1	819.409	2456.21	2456.21	0.54	0.00044	CID (Collision Induced Dissociation)	MS2	13.6871	21.2	19.755	71.3588	14685	201015L_YASAM07425_YAII63-12.raw	F4.8	5690.56	5031.64	8271.92	8205.76	6088.31	8570.69	12381.6	4749.22	1657.83	5058.3	9468.93	7927.32	5328.32	7462.01	6493.99	4090.93		4.65	1	FALSE	0.0001042	4.935e-06
High	Unambiguous	[K].lESEMEDAYHEHQANLLR.[Q]	N-Term(TMTpro)	1	P23246	P23246	0	3	0.6748	0	1	1	830.407	2489.21	2489.2	0.04	4e-05	CID (Collision Induced Dissociation)	MS2	0	12	28.365	71.3337	14677	201015L_YASAM07425_YAII63-12.raw	F4.8	2863.85	3018.99	3806.61	3624.15	2520.41	3171.21	2853.72	2577.87	1284.94	3551.17	3877.2	2956.27	2849.22	2865.97	3331.26	2374.91		5.32	1	FALSE	0.0001042	1.283e-08
High	Unambiguous	[R].nPDDITQEEYGEFYk.[S]	N-Term(TMTpro); K15(TMTpro)	1	P08238	P08238	0	2	0.6884	0	1	1	1228.61	2456.22	2456.21	2.35	0.00289	CID (Collision Induced Dissociation)	MS2	0	12.5	71.99	71.3101	14670	201015L_YASAM07425_YAII63-12.raw	F4.8	2351.78	2033.06	3297.52	3364.97	2296.67	3837.61	4297.1	3565	812.935	2006.43	3050.22	4602.61	2899.9	4606.98	3152.16	2238.03		5.36	1	FALSE	0.0001042	2.597e-06
High	Unambiguous	[R].mAEIGEHVAPSEAANSLEQAQAAAER.[L]	N-Term(TMTpro)	1	P27708	P27708	0	3	0.6603	0	1	1	995.496	2984.47	2984.47	0.67	0.00066	CID (Collision Induced Dissociation)	MS2	0	6.3	119.5	71.3061	14669	201015L_YASAM07425_YAII63-12.raw	F4.8	744.836	1504.09	1966.36	1498.17	1297.52	1859	2900.93	1152.79		1032.04	2524.26	2035.33	1392.01	1864.62	1761.55	1430.81		6.33	1	FALSE	0.0001042	7.684e-08
High	Unambiguous	[K].iTIADcGQLE.[-]	N-Term(TMTpro); C6(Carbamidomethyl)	1	P62937	P62937	0	2	0.6497	0	1	1	712.375	1423.74	1423.74	0.37	0.00026	CID (Collision Induced Dissociation)	MS2	0	5.5	31.891	71.251	14654	201015L_YASAM07425_YAII63-12.raw	F4.8	1364.06	1414.69	2010.42	1252.66	1297.13	1808.59	1541.4	1349.37		1445.91	1290.61	1665.11	1539.09	2195.51	1312.85	1185.76		3.14	1	FALSE	0.0001042	0.0001419
High	Unambiguous	[K].sIQEIQELDkDDESLR.[K]	N-Term(TMTpro); K10(TMTpro)	1	P52565	P52565	1	3	0.5712	0	1	1	842.79	2526.35	2526.35	0.22	0.00018	CID (Collision Induced Dissociation)	MS2	14.4589	35.1	29.41	71.2376	14649	201015L_YASAM07425_YAII63-12.raw	F4.8	7974.5	4947.52	11655.5	10453	7234.21	12905.7	12593.1	8773.09	2305.92	6704.12	9672.43	13248.6	7415.14	13519.4	4836.15	5765.49		5.13	1	FALSE	0.0001042	3.386e-05
High	Unambiguous	[K].lESEMEDAYHEHQANLLR.[Q]	N-Term(TMTpro)	1	P23246	P23246	0	4	0.7231	0	1	1	623.058	2489.21	2489.2	2.25	0.0014	CID (Collision Induced Dissociation)	MS2	27.7472	2.3	26.887	71.2068	14638	201015L_YASAM07425_YAII63-12.raw	F4.8	488.296	579.483		668.053		722.049	818.517	470.258			1162.07	717.981	648.961	1120.32	949.521	562.082		4.37	1	FALSE	0.0001042	2.835e-08
High	Unambiguous	[R].sHPLDPIDTVDFER.[E]	N-Term(TMTpro)	1	P47897	P47897	0	3	0.5758	0	1	1	649.006	1945	1945	1.98	0.00128	CID (Collision Induced Dissociation)	MS2	9.35993	5	53.681	71.143	14623	201015L_YASAM07425_YAII63-12.raw	F4.8	1798.12	917.78	1822.25	1154.05		1446.09	832.329	1430.97	556.933	1259.77	1484.13	1861.7	1859.41	1453.61	1204.24	486.273		3.63	1	FALSE	0.0001042	0.0001176
High	Unambiguous	[R].emEENFAVEAANYQDTIGR.[L]	N-Term(TMTpro); M2(Oxidation)	1	P08670	P08670	0	2	0.7174	0	1	1	1254.09	2507.17	2507.17	-0.17	-0.00021	CID (Collision Induced Dissociation)	MS2	30.6637	12.3	119.5	71.089	14611	201015L_YASAM07425_YAII63-12.raw	F4.8	2541.25	2702.9	3042.78	2966.73	2495.1	4048.28	5023.17	3061.16	1643.68	2633.54	3298.38	3414.04	3575.41	2701.29	3814.88	2672.31		4.14	1	TRUE	0.0001042	3.376e-05
High	Unambiguous	[R].nPDDITNEEYGEFYk.[S]	N-Term(TMTpro); K15(TMTpro)	1	P07900	P07900	0	3	0.6215	0	1	1	814.737	2442.2	2442.2	0.7	0.00057	CID (Collision Induced Dissociation)	MS2	5.87127	23.1	14.601	71.0721	14607	201015L_YASAM07425_YAII63-12.raw	F4.8	7109.19	4677.98	8900.36	7698.12	6900.17	12786.8	10842.2	7711.02	3454.52	6388.93	9818.88	11052	10857.7	12299.6	8132.66	6044.57		3.91	1	FALSE	0.0001042	2.704e-07
High	Unambiguous	[K].dYLALNEDLR.[S]	N-Term(TMTpro)	1		P17693	0	2	0	0	1	1	763.413	1525.82	1525.82	0.02	1e-05	CID (Collision Induced Dissociation)	MS2	5.34422	11.3	43.632	71.0607	14604	201015L_YASAM07425_YAII63-12.raw	F4.8	1993.35	2274.09	2649.07	2640.2	2217.89	3807.56	2761.66	2047.37	1224.12	2620.44	4223.34	4363.35	4468.37	2765.64	3496.91	2503.84		3.46	3	FALSE	0.0001042	0.0003241
High	Unambiguous	[R].emEENFAVEAANYQDTIGR.[L]	N-Term(TMTpro); M2(Oxidation)	1	P08670	P08670	0	3	0.7371	0	1	1	836.396	2507.17	2507.17	1.9	0.00159	CID (Collision Induced Dissociation)	MS2	0	7.4	35.092	71.0345	14597	201015L_YASAM07425_YAII63-12.raw	F4.8	1714.19	1791.42	2001.13	2333.64	1275.61	1651.5	2261.08	1399.37	1168.24	1633.09	2204.02	2220.13	2325.67	2469.79	1377.55	1265.45		6.01	1	TRUE	0.0001042	2.733e-06
High	Unambiguous	[R].tTYLVLDEADR.[M]	N-Term(TMTpro)	1	P17844	P17844	0	2	0.4626	0	1	1	800.432	1599.86	1599.85	0.91	0.00073	CID (Collision Induced Dissociation)	MS2	0	10.1	65.969	70.8305	14546	201015L_YASAM07425_YAII63-12.raw	F4.8	2375.2	2000.98	3408.86	2897.99	2752.37	2358.15	2935.31	2715.42	739.904	2964.09	2312.92	2998.14	2914.91	3163.93	2045.18	2319.51		3.61	1	FALSE	0.0001042	0.0001296
High	Unambiguous	[R].aLEESNYELEGk.[I]	N-Term(TMTpro); K12(TMTpro)	7	P13645	119581085; P13645; P13645; 88041; 547749; 88042; 71528	0	3	0.2966	0	1	1	664.027	1990.07	1990.06	1.33	0.00088	CID (Collision Induced Dissociation)	MS2	37.9303	14.9	15.526	67.7415	13632	201015L_YASAM07425_YAII63-12.raw	F4.8	4230.18	3511.1	4346.45	5231.25	3371.83	4044.36	4844.54	3099.79	1780.54	2392.76	4714.86	5268.63	3378.74	4014.38	2716.24	1303.29		3.27	1	TRUE	0.0001042	7.716e-05
High	Unambiguous	[R].wQPDTEEEYEDSSGNVVNk.[K]	N-Term(TMTpro); K19(TMTpro)	1	Q12874	Q12874	0	3	0.5194	0	1	1	945.458	2834.36	2834.36	-0.87	-0.00083	CID (Collision Induced Dissociation)	MS2	0	13.6	60.546	67.7233	13625	201015L_YASAM07425_YAII63-12.raw	F4.8	3064.9	1989.42	4298.99	4036.72	2237.94	3441.88	5064.06	3490.89	1830.12	3145.23	3738.6	5203.84	3341.69	4390.88	3407.77	1734.62		4.12	1	FALSE	0.0001042	3.574e-05
High	Unambiguous	[K].iVYGHLDDPASQEIER.[G]	N-Term(TMTpro)	1	Q99798	Q99798	0	2	0.4879	0	1	1	1073.56	2146.11	2146.11	0.32	0.00034	CID (Collision Induced Dissociation)	MS2	0	7.2	119.5	67.6693	13603	201015L_YASAM07425_YAII63-12.raw	F4.8	1266.35	1998.3	1950.97	2466.08	1788.53	2142.25	1073.92	1795.44	765.393	1290.74	3149.66	1900.75	1342.57	2005.86	1274.96	1433.33		4.55	1	FALSE	0.0001042	8.365e-06
High	Unambiguous	[K].eGMNIVEAmER.[F]	N-Term(TMTpro); M9(Oxidation)	1	P62937	P62937	0	3	0.5686	0	1	1	533.599	1598.78	1598.78	-0.58	-0.00031	CID (Collision Induced Dissociation)	MS2	0	16	6.256	64.5288	12301	201015L_YASAM07425_YAII63-12.raw	F4.8	5696.76	5526.26	7224.98	6521.1	5557.15	7936.75	8982.54	5652.97	1785.43	7376.47	8099.62	6328.51	8741.5	6107.46	4303.7	5312.22		4.08	1	FALSE	0.0001042	4.332e-05
High	Unambiguous	[R].sSEVcADcSGPDPSWASVNR.[G]	N-Term(TMTpro); C5(Carbamidomethyl); C8(Carbamidomethyl)	1	Q14161	Q14161	0	2	0.7988	0	1	1	1243.06	2485.1	2485.1	0	0	CID (Collision Induced Dissociation)	MS2	0	0.1	119.5	64.4548	12267	201015L_YASAM07425_YAII63-12.raw	F4.8				525.45														4.97	1	FALSE	0.0001042	1.057e-05
High	Unambiguous	[K].mHDLNTDQENLVGTHDAPIR.[C]	N-Term(TMTpro)	1	O43684	O43684	0	3	0.4342	0	1	1	860.764	2580.28	2580.28	-0.71	-0.00061	CID (Collision Induced Dissociation)	MS2	44.7277	15.6	14.651	64.3536	12226	201015L_YASAM07425_YAII63-12.raw	F4.8	5685.32	4248.94	6199.46	4841.43	4032.41	5945.18	5842.79	5144.66	2258.13	4492.15	5940.72	7035.43	4749.48	4765.78	5549.18	4479.99		5.09	1	FALSE	0.0001042	2.421e-06
High	Unambiguous	[R].sSHYDELLAAEAR.[A]	N-Term(TMTpro)	1	Q7KZF4	Q7KZF4	0	2	0.4737	0	1	1	883.456	1765.9	1765.9	0.55	0.00048	CID (Collision Induced Dissociation)	MS2	0	28	22.009	64.3405	12221	201015L_YASAM07425_YAII63-12.raw	F4.8	7064.84	6820.04	7191.15	6702.57	6178.99	8124.42	8878.83	6093.38	3737.17	5903.32	9884.44	9856.52	6773.53	8093.42	8710.61	5308.11		2.85	1	FALSE	0.0001042	1.482e-05
High	Unambiguous	[K].eHNGQVTGIDWAPESNR.[I]	N-Term(TMTpro)	1	O15143	O15143	0	3	0.7495	0	1	1	738.701	2214.09	2214.09	0.9	0.00066	CID (Collision Induced Dissociation)	MS2	0	10.3	7.824	64.3245	12214	201015L_YASAM07425_YAII63-12.raw	F4.8	4432.83	5094.97	5571.41	7484.94	4130.12	9291.79	6796.65	6871.51		3445.11	7071.08	9164.81	7100.39	5721.96	6349.45	4249.52		5.43	1	FALSE	0.0001042	2.46e-05
High	Unambiguous	[K].mHDLNTDQENLVGTHDAPIR.[C]	N-Term(TMTpro)	1	O43684	O43684	0	4	0.3926	0	1	1	645.825	2580.28	2580.28	-1.09	-0.0007	CID (Collision Induced Dissociation)	MS2	22.0344	4.6	2.132	64.3183	12209	201015L_YASAM07425_YAII63-12.raw	F4.8	12594.8	10823.6	8269.52	7376.71	10461.7	11475.6	9749.69	5955.21	4148.16	12704.9	11002.8	9664.88	5848.48	10167.4	8217.8	10875.5		5.68	1	FALSE	0.0001042	2.073e-06
High	Unambiguous	[K].eDGLAQQQTQLNLR.[S]	N-Term(TMTpro)	1	P49327	P49327	0	2	0.5831	0	1	1	959.52	1918.03	1918.03	0.37	0.00036	CID (Collision Induced Dissociation)	MS2	0	17	52.862	64.5499	12311	201015L_YASAM07425_YAII63-12.raw	F4.8	3733.89	3449.36	3934.88	3614.15	4629.07	6107.34	5186.14	3509.38	2061.67	3533.24	4708.11	4784.48	3361.85	4654.49	4933.54	2499.92		4.15	1	FALSE	0.0001042	5.173e-06
High	Unambiguous	[K].gPSGcVESLEVTcR.[R]	N-Term(TMTpro); C5(Carbamidomethyl); C13(Carbamidomethyl)	1	P47897	P47897	0	2	0.6217	0	1	1	927.954	1854.9	1854.9	-0.58	-0.00054	CID (Collision Induced Dissociation)	MS2	14.9849	22.4	46.621	64.3037	12203	201015L_YASAM07425_YAII63-12.raw	F4.8	5027.77	6392.19	4909.01	6526.58	4514.66	7096.08	5508.95	6018.73	3525.26	4245.74	7157.41	6876.43	4383.85	6903.54	6394.35	4974.22		3.78	1	FALSE	0.0001042	4.163e-06
High	Unambiguous	[R].sSHYDELLAAEAR.[A]	N-Term(TMTpro)	1	Q7KZF4	Q7KZF4	0	3	0.575	0	1	1	589.306	1765.9	1765.9	-1.09	-0.00064	CID (Collision Induced Dissociation)	MS2	24.5576	10.7	4.817	64.1889	12148	201015L_YASAM07425_YAII63-12.raw	F4.8	10787.1	7816.76	10548.9	12457	8431.01	12102.3	12964.5	12158.9	4474.19	9188.58	10372.2	9136.54	13454.6	14443.8	13344.3	10488.5		4.8	1	FALSE	0.0001042	5.266e-05
High	Unambiguous	[K].eQGPYETYEGSPVSk.[G]	N-Term(TMTpro); K15(TMTpro)	1	P23921	P23921	0	2	0.5102	0	1	1	1140.09	2279.17	2279.17	0.23	0.00026	CID (Collision Induced Dissociation)	MS2	23.096	8.6	54.074	64.1575	12133	201015L_YASAM07425_YAII63-12.raw	F4.8	2427.82	2063.11	2281.31	1766.89	1665.6	2899.88	3064.35	2155.91	519.084	1892.55	1501.07	3217.16	2521.61	3088.74	2500.77	2016.1		5.41	1	FALSE	0.0001042	7.384e-09
High	Unambiguous	[K].lGNYAGAVQDcER.[A]	N-Term(TMTpro); C11(Carbamidomethyl)	1	O43765	O43765	0	2	0.5765	0	1	1	878.934	1756.86	1756.86	-0.13	-0.00011	CID (Collision Induced Dissociation)	MS2	42.4833	28.5	31.972	64.0919	12104	201015L_YASAM07425_YAII63-12.raw	F4.8	7778.75	6929.89	8664.78	7121.75	5899.58	8850.47	9265.81	6397.02	2673.86	5932.82	8955.67	8447.9	7471.08	9157.23	8824.51	4588.36		3.4	1	FALSE	0.0001042	0.0001703
High	Unambiguous	[K].lGNYAGAVQDcER.[A]	N-Term(TMTpro); C11(Carbamidomethyl)	1	O43765	O43765	0	2	0.5164	0	1	1	878.934	1756.86	1756.86	0.08	7e-05	CID (Collision Induced Dissociation)	MS2	53.7563	27.7	24.876	64.066	12093	201015L_YASAM07425_YAII63-12.raw	F4.8	7553.35	5860.95	7749.51	7938.42	6793.36	7860.46	7672.4	7794.51	3326.46	6186.71	6777.23	7741.17	6418.56	10047.5	8078.12	5482.6		3.04	1	FALSE	0.0001042	0.000149
High	Unambiguous	[K].dYIVVGSDSGR.[I]	N-Term(TMTpro)	1	Q15393	Q15393	0	2	0.6436	0	1	1	736.388	1471.77	1471.77	-1.92	-0.00141	CID (Collision Induced Dissociation)	MS2	0	15.9	11.718	64.0478	12086	201015L_YASAM07425_YAII63-12.raw	F4.8	6437.62	5580.73	8961.49	6746.32	6408.22	6160.6	6970.86	6316.06	3857.48	4674.11	7737.56	8226.12	7951.24	9680.75	8428.13	5491.27		3.9	1	FALSE	0.0001042	0.0001875
High	Unambiguous	[K].yASFQVENDQER.[F]	N-Term(TMTpro)	1	P53992	P53992	0	2	0.6	0	1	1	895.437	1789.87	1789.87	-0.89	-0.0008	CID (Collision Induced Dissociation)	MS2	38.7043	48.5	17.847	64.0137	12069	201015L_YASAM07425_YAII63-12.raw	F4.8	10668.5	11180.3	13532.1	10843.9	10914	14309.7	13027.5	9671.38	6113.94	10954.7	11426.6	16325.9	13232.6	15243	11779.1	9314.53		3.85	1	FALSE	0.0001042	0.0001407
High	Unambiguous	[R].aGTGVDNVDLEAATR.[K]	N-Term(TMTpro)	1	O43175	O43175	0	2	0.6272	0	1	1	896.971	1792.93	1792.94	-0.65	-0.00058	CID (Collision Induced Dissociation)	MS2	26.4675	33	19.412	64.2989	12200	201015L_YASAM07425_YAII63-12.raw	F4.8	7950.84	7254.45	10881.4	7493.91	7472.14	10798.6	8754.97	8677.66	3179.18	8312.71	9791.45	10327.6	8227.06	8445.6	7403.45	6258.84		4.64	1	FALSE	0.0001042	1.753e-07
High	Unambiguous	[R].aNNLHSGDNFQLNDSEIER.[Q]	N-Term(TMTpro)	1	Q9BZF1	Q9BZF1	0	3	0.5063	0	1	1	826.403	2477.19	2477.2	-1.26	-0.00104	CID (Collision Induced Dissociation)	MS2	26.2663	16.1	20.291	64.6113	12338	201015L_YASAM07425_YAII63-12.raw	F4.8	4191.18	4421.36	6062.57	4797.98	3813.48	5326.72	4772.07	4674.59	1671.65	4832.61	5174.02	5749.05	5751.23	5667.3	5684.89	3679.2		6.38	1	FALSE	0.0001042	0.000217
High	Unambiguous	[R].sSLGQSASETEEDTVSVSk.[K]	N-Term(TMTpro); K19(TMTpro)	1	Q13435	Q13435	0	2	0.5725	0	1	1	1275.16	2549.31	2549.31	0.78	0.00099	CID (Collision Induced Dissociation)	MS2	0	2.5	71.6	64.6223	12343	201015L_YASAM07425_YAII63-12.raw	F4.8	755.527	939.135	916.643			968.576	884.27	1038.15				1010.03	556.13	838.442	1200.48	605.784		5.45	1	FALSE	0.0001042	6.55e-06
High	Unambiguous	[R].aGTGVDNVDLEAATR.[K]	N-Term(TMTpro)	1	O43175	O43175	0	3	0.499	0	1	1	598.317	1792.94	1792.94	0.67	0.0004	CID (Collision Induced Dissociation)	MS2	16.6842	10.6	6.93	64.6373	12350	201015L_YASAM07425_YAII63-12.raw	F4.8	4725.33	5498.47	5206.03	5924.15	3804.69	4946.69	5572.21	3748.61	3311.99	4154.11	5665.24	5854.24	4226.69	6172.79	3163.19	5658.37		4.77	1	FALSE	0.0001042	3.812e-05
High	Unambiguous	[K].qSTDEEVTSLAk.[S]	N-Term(TMTpro); K12(TMTpro)	1	P23193	P23193	0	2	0.4037	0	1	1	958.527	1916.05	1916.05	0.19	0.00018	CID (Collision Induced Dissociation)	MS2	27.0131	17.6	38.577	65.1511	12584	201015L_YASAM07425_YAII63-12.raw	F4.8	4574.9	4471.81	3797.47	3576.92	3314.37	5328.81	4915.06	3387.21	1780.65	2290.61	5026.39	5971.33	5409.29	5215.59	5953.47	2909		4.31	1	FALSE	0.0001042	3.26e-05
High	Unambiguous	[K].eDQYDHLDAADMTk.[V]	N-Term(TMTpro); K14(TMTpro)	1	P34932	P34932	0	3	0.7671	0	1	1	754.039	2260.1	2260.1	-1.01	-0.00076	CID (Collision Induced Dissociation)	MS2	0	21	10.253	65.1213	12571	201015L_YASAM07425_YAII63-12.raw	F4.8	5683.63	3124.72	5784.75	6084.49	5411.66	10125.9	8358.09	7361.4	1819.11	4012.27	7257.43	9335.62	4825.9	7114.44	6142.91	4119.47		3.65	1	FALSE	0.0001042	1.149e-05
High	Unambiguous	[K].vLHEAEGHIVTcETNTGEVYR.[G]	N-Term(TMTpro); C12(Carbamidomethyl)	1	P62318	P62318	0	2	0.6924	0	1	1	1359.68	2718.35	2718.35	-0.07	-9e-05	CID (Collision Induced Dissociation)	MS2	12.9614	2.8	119.5	65.096	12558	201015L_YASAM07425_YAII63-12.raw	F4.8	1021.99	1146.83	921.87		1059.17	963.265	601.278			676.659	763.192	577.547	1523.8	954.023	477.952	612.054		5.56	1	FALSE	0.0001042	3.782e-06
High	Unambiguous	[K].gLSEDTTEETLk.[E]	N-Term(TMTpro); K12(TMTpro)	1	P19338	P19338	0	2	0.4561	0	1	1	966.027	1931.05	1931.05	0.23	0.00023	CID (Collision Induced Dissociation)	MS2	25.3361	42.7	26.433	65.0689	12545	201015L_YASAM07425_YAII63-12.raw	F4.8	11337.3	8288.96	14047.4	11331.3	8352.91	14626.4	13253.5	10787.2	3514.63	6636.91	11780	14766.6	11825	14486.2	11622.9	6889.69		4.1	1	FALSE	0.0001042	3.832e-05
High	Unambiguous	[K].eSWEMNSEEk.[L]	N-Term(TMTpro); K10(TMTpro)	1	Q02790	Q02790	0	2	0.5771	0	1	1	938.965	1876.92	1876.92	-0.78	-0.00074	CID (Collision Induced Dissociation)	MS2	0	27.2	37.086	65.0413	12533	201015L_YASAM07425_YAII63-12.raw	F4.8	6876.82	4665.1	7174.09	7094.23	6567.44	8443.64	9831.09	6488.3	1983.1	4514.3	7798.25	10002.1	7351.49	9701.83	7912.7	4492.75		3.5	1	FALSE	0.0001042	0.0001289
High	Unambiguous	[K].vLHEAEGHIVTcETNTGEVYR.[G]	N-Term(TMTpro); C12(Carbamidomethyl)	1	P62318	P62318	0	3	0.654	0	1	1	906.786	2718.34	2718.35	-1.26	-0.00114	CID (Collision Induced Dissociation)	MS2	12.0441	21.6	8.446	65.0364	12530	201015L_YASAM07425_YAII63-12.raw	F4.8	13368.3	13645.9	16143.6	19365.6	12781.8	18502.8	15101.6	14261.4	5419.42	12724.3	16427.1	17460.2	17456.8	19627.9	14073.1	11158.7		6.33	1	FALSE	0.0001042	4.708e-09
High	Unambiguous	[K].eYEATLEEccAk.[D]	N-Term(TMTpro); C9(Carbamidomethyl); C10(Carbamidomethyl); K12(TMTpro)	1	P02769	P02769	0	2	0.5546	0	1	1	1056.02	2111.03	2111.03	0.15	0.00015	CID (Collision Induced Dissociation)	MS2	0	17.1	119.5	65.0084	12520	201015L_YASAM07425_YAII63-12.raw	F4.8	5403.13	3802.38	5383.01	3448.38	3609.74	4832.02	6994.52	4038.65	1153.72	2787.06	4613.34	4977.64	4102.08	5575.63	5335.68	1679.83		5.68	1	TRUE	0.0001042	1.548e-05
High	Unambiguous	[K].lYGSAGPPPTGEEDTAEk.[D]	N-Term(TMTpro); K18(TMTpro)	1	P11021	P11021	0	2	0.6539	0	1	1	1214.13	2427.25	2427.25	-0.02	-2e-05	CID (Collision Induced Dissociation)	MS2	0	3	119.5	64.985	12511	201015L_YASAM07425_YAII63-12.raw	F4.8	700.501	597.45	1011.53	636.966		1101.37	726.828	1159.31	629.365		1127.81	1120.62	940.536		840.681	1158.86		6.01	1	FALSE	0.0001042	2.269e-08
High	Unambiguous	[K].iQEENVIPR.[E]	N-Term(TMTpro)	1	P42704	P42704	0	2	0.3414	0	1	1	701.404	1401.8	1401.8	-0.47	-0.00033	CID (Collision Induced Dissociation)	MS2	0	16.2	5.728	64.9778	12507	201015L_YASAM07425_YAII63-12.raw	F4.8	14442.7	13775.3	18114.8	17154.3	13037.5	15590.7	18161.8	16509.2	8523.76	13908.1	13640.7	21674.2	17347.6	16938.7	16126.4	12568.5		3.31	1	FALSE	0.0001042	0.0003873
High	Unambiguous	[K].iVQAEGEAEAAk.[M]	N-Term(TMTpro); K12(TMTpro)	1	Q99623	Q99623	0	2	0.4105	0	1	1	912.521	1824.04	1824.04	-0.35	-0.00032	CID (Collision Induced Dissociation)	MS2	15.5976	30.1	34.419	64.94	12489	201015L_YASAM07425_YAII63-12.raw	F4.8	7194.93	5201.04	8891.87	7116.3	6116.73	8934.52	11286.3	7771.63	1682.1	5830.66	8417.2	10930.2	7904.33	9145.95	6734.23	5742.79		3.8	1	FALSE	0.0001042	7.492e-05
High	Unambiguous	[K].vLHEAEGHIVTcETNTGEVYR.[G]	N-Term(TMTpro); C12(Carbamidomethyl)	1	P62318	P62318	0	4	0.6897	0	1	1	680.344	2718.35	2718.35	2.48	0.00169	CID (Collision Induced Dissociation)	MS2	27.6013	9.7	5.791	64.8943	12469	201015L_YASAM07425_YAII63-12.raw	F4.8	7256.16	5623.39	5129.28	5914.42	7515.02	7557.27	8257.05	5200.56	5138.49	5569.33	8728.23	7756.28	6373.22	9048.76	4756.91	4510.3		5.64	1	FALSE	0.0001042	2.869e-06
High	Unambiguous	[K].vNFSEEGETEEDDQDSSHSSVTTVk.[A]	N-Term(TMTpro); K25(TMTpro)	1	Q5JTV8	Q5JTV8	0	3	0.7012	0	1	1	1122.2	3364.58	3364.58	0.93	0.00105	CID (Collision Induced Dissociation)	MS2	0	9.7	119.5	64.8731	12460	201015L_YASAM07425_YAII63-12.raw	F4.8	1313.16	2278.18	2811.39	3178.09	1507.19	3454.45	3349.87	2565.89	1194.98	1794.2	2479.5	3543.86	2693.52	3003.49	2889.08	1613.07		6.56	1	FALSE	0.0001042	3.988e-06
High	Unambiguous	[R].lAcDVDQVTR.[Q]	N-Term(TMTpro); C3(Carbamidomethyl)	1	P78527	P78527	0	2	0.2915	0	1	1	740.892	1480.78	1480.77	0.78	0.00058	CID (Collision Induced Dissociation)	MS2	30.8117	17.9	15.029	64.8155	12432	201015L_YASAM07425_YAII63-12.raw	F4.8	8198.19	7049.86	6123.49	6139.77	6429.82	7640.19	6692.65	8316.04	2671.53	6754.67	7268.91	8085.79	6650.8	7923.99	7350.07	6068.1		2.95	1	FALSE	0.0001042	0.0002205
High	Unambiguous	[K].nIDDGTSDRPYSHALVAGIDR.[Y]	N-Term(TMTpro)	1	P61353	P61353	0	4	0.4646	0	1	1	644.831	2576.3	2576.3	-0.67	-0.00043	CID (Collision Induced Dissociation)	MS2	0	5	5.038	64.7152	12387	201015L_YASAM07425_YAII63-12.raw	F4.8	9382.58	8796.49	14677.2	8521.33	9857.63	14220.6	8527.93	6579.32	3980.39	4750.03	8124.11	11020.9	7481.06	8206.49	6528.1	3514.29		3.81	1	FALSE	0.0001042	3.024e-05
High	Unambiguous	[K].gQLcELScSTDYR.[M]	N-Term(TMTpro); C4(Carbamidomethyl); C8(Carbamidomethyl)	1	Q99873	Q99873	0	2	0.7258	0	1	1	946.943	1892.88	1892.88	-0.96	-0.00091	CID (Collision Induced Dissociation)	MS2	0	16.5	37.866	64.6924	12377	201015L_YASAM07425_YAII63-12.raw	F4.8	6035.07	4135.73	4524.4	4017.88	4002.27	3841.44	4353.35	2790.19	1801.83	3342.51	5722.69	4556.45	4920.71	4451.46	3896.28	3001.93		3.61	1	FALSE	0.0001042	1.358e-05
High	Unambiguous	[R].vQDLSAGGQGSLTDSGPER.[R]	N-Term(TMTpro)	1	P40222	P40222	0	2	0.6057	0	1	1	1089.55	2178.1	2178.1	0.22	0.00024	CID (Collision Induced Dissociation)	MS2	0	6.9	119.5	63.9913	12060	201015L_YASAM07425_YAII63-12.raw	F4.8	1783.51	1257.03	2071.56	1743.02	1190.17	2734.66	1410	1905.44		1417.69	1778.34	2886.37	2488.79	2864.84	548.108	1711.91		4.59	1	FALSE	0.0001042	4.202e-08
High	Unambiguous	[K].eQGPYETYEGSPVSk.[G]	N-Term(TMTpro); K15(TMTpro)	1	P23921	P23921	0	3	0.4372	0	1	1	760.398	2279.18	2279.17	4.16	0.00316	CID (Collision Induced Dissociation)	MS2	33.8182	8.1	15.069	63.9896	12058	201015L_YASAM07425_YAII63-12.raw	F4.8	6944.8	3904.2	6358.18	4519.17	6027.82	7738.77	7724.02	7577.12	1981.33	7639.88	6271.68	5889.41	7656.58	5905.37	5180.36	3653.16		4.3	1	FALSE	0.0001042	7.7e-06
High	Unambiguous	[K].eGIcAIGGTSEQSSVGTQHSYSEEEk.[Y]	N-Term(TMTpro); C4(Carbamidomethyl); K26(TMTpro)	1	P13796	P13796	0	4	0.5921	0	1	1	845.413	3378.63	3378.63	1.96	0.00166	CID (Collision Induced Dissociation)	MS2	9.61607	8.2	7.117	63.9605	12045	201015L_YASAM07425_YAII63-12.raw	F4.8	8533.6	7059.13	8961.32	9177.08	8602.38	14829.7	14452.8	8328.19		6832.15	9221.45	14200.7	13849.4	16363	11565.5	6324.26		7.38	1	FALSE	0.0001042	9.191e-09
High	Unambiguous	[K].eQQEPSSGGSVVPTVQEPk.[D]	N-Term(TMTpro); K19(TMTpro)	1	Q96JJ7	Q96JJ7	0	3	0.5282	0	1	1	864.465	2591.38	2591.38	0.31	0.00027	CID (Collision Induced Dissociation)	MS2	43.5934	21.1	19.746	63.8964	12016	201015L_YASAM07425_YAII63-12.raw	F4.8	5555.46	4543.58	5055.66	5711.18	4418.85	6836.66	6514	4747.28	2037.47	4410.02	4769.41	6418.03	6394.09	5645.35	7452.23	3666.62		4.79	1	FALSE	0.0001042	0.0003162
High	Unambiguous	[R].lQETSSQSYVEEQk.[Q]	N-Term(TMTpro); K14(TMTpro)	2	Q8N9T8	Q8N9T8; Q8N9T8	0	2	0.5556	0	1	1	1132.6	2264.19	2264.19	0.89	0.00101	CID (Collision Induced Dissociation)	MS2	63.9685	5.9	119.5	63.3349	11770	201015L_YASAM07425_YAII63-12.raw	F4.8	1448.66	1137.58	2072.99	1367.1	1343.78	2743.29	1429.19	1959.1		702.317	1587.13	1227.34	1266.07	1973.01	1174.37	1474.96		4.41	1	TRUE	0.0001042	1.328e-06
High	Unambiguous	[R].gTEAGQVGEPGIPTGEAGPScSSASDk.[L]	N-Term(TMTpro); C21(Carbamidomethyl); K27(TMTpro)	1	O15355	O15355	0	3	0.7141	0	1	1	1052.18	3154.54	3154.55	-2.91	-0.00306	CID (Collision Induced Dissociation)	MS2	0	6.6	48.516	63.1826	11698	201015L_YASAM07425_YAII63-12.raw	F4.8	1786.32	1120.88	1809.84	1776.04	989.941	1569.89	2037.82	2201		1523.73	803.37	1912.44	1615.02	3376	843.208	1954.31		7.17	1	FALSE	0.0001042	1.614e-07
High	Unambiguous	[K].rPAEDMEEEQAFk.[R]	N-Term(TMTpro); K13(TMTpro)	1	P61978	P61978	0	3	0.5833	0	1	1	730.046	2188.12	2188.12	1.27	0.00093	CID (Collision Induced Dissociation)	MS2	4.29631	14.5	5.111	63.1539	11684	201015L_YASAM07425_YAII63-12.raw	F4.8	15286.9	12907.2	16034.7	23374	16033.4	24803.4	23574.6	19884.4	2608.67	15047.2	20026.4	31547.8	18798	21003	20500.5	15370.8		5.28	1	FALSE	0.0001042	1.861e-05
High	Unambiguous	[R].gEGGILINSQGER.[F]	N-Term(TMTpro)	1	P31040	P31040	0	2	0.4318	0	1	1	817.446	1633.89	1633.88	1.64	0.00134	CID (Collision Induced Dissociation)	MS2	0	19.4	17.627	63.071	11648	201015L_YASAM07425_YAII63-12.raw	F4.8	6984.98	7308.03	9390.65	8149.52	7264.78	8414.83	7048.37	7925.11	3539.41	6538.41	7469.08	10461.9	8432.38	6573.64	7850.35	5195.43		3.59	1	FALSE	0.0001042	7.706e-05
High	Unambiguous	[K].eVDEQmLNVQNk.[N]	N-Term(TMTpro); M6(Oxidation); K12(TMTpro)	4	P07437; P68371	Q13885; P07437; P68371; Q9BVA1	0	2	0.4161	0	1	1	1036.05	2071.1	2071.1	0.43	0.00044	CID (Collision Induced Dissociation)	MS2	0	11.3	119.5	63.0603	11643	201015L_YASAM07425_YAII63-12.raw	F4.8	2643.13	3742.01	3455.98	3451.73	2443.59	3414.69	3396.32	1713.79	848.005	2491.73	3063.31	2976.48	2480.62	3195.27	3292.61	2055.9		4.23	2	FALSE	0.0001042	7.253e-06
High	Unambiguous	[K].sEPIPESNDGPVk.[V]	N-Term(TMTpro); K13(TMTpro)	1	P30101	P30101	0	3	0.4956	0	1	1	659.698	1977.08	1977.08	1.25	0.00082	CID (Collision Induced Dissociation)	MS2	0	8	5.98	63.0571	11641	201015L_YASAM07425_YAII63-12.raw	F4.8	12720.5	8011.26	11063.5	11535	7504.37	11243.9	11273	9835.85	3779.58	6514.98	12566.3	14063.8	12351.6	6842.85	10439.1	5678.88		3.39	1	FALSE	0.0001042	0.0001398
High	Unambiguous	[K].aASGFNAmEDAQTLR.[K]	N-Term(TMTpro); M8(Oxidation)	1	P09525	P09525	0	2	0.4394	0	1	1	951.47	1901.93	1901.93	-0.72	-0.00068	CID (Collision Induced Dissociation)	MS2	92.7556	26.4	42.028	63.0402	11634	201015L_YASAM07425_YAII63-12.raw	F4.8	4577.87	5908.65	7840.76	6878.9	6399.4	9177.18	9773.6	6819.08	2363.19	5170.89	6934.9	8245.87	6514.33	9948.18	8505.31	3898.31		3.3	1	FALSE	0.0001042	3.371e-05
High	Unambiguous	[R].iQETQAELPR.[G]	N-Term(TMTpro)	1	Q14566	Q14566	0	2	0.4855	0	1	1	744.92	1488.83	1488.83	-0.39	-0.00029	CID (Collision Induced Dissociation)	MS2	0	21.2	4.274	63.0377	11632	201015L_YASAM07425_YAII63-12.raw	F4.8	18980	18171.2	21504.7	30961.9	20599.1	24939.1	25998.2	22468.5	8791.24	20440.6	29991.5	27212.2	19459.2	29323.9	17711	17790.7		3.79	1	FALSE	0.0001042	0.0002929
High	Unambiguous	[R].lHGLDEEAEQk.[L]	N-Term(TMTpro); K11(TMTpro)	1	P33991	P33991	0	2	0.4371	0	1	1	939.016	1877.03	1877.03	-0.31	-0.00029	CID (Collision Induced Dissociation)	MS2	0	19.7	44.764	62.979	11604	201015L_YASAM07425_YAII63-12.raw	F4.8	2963.07	4234.41	5785.36	4612.67	3666.65	6887.14	7796.57	4804.45	1914.63	3429.13	5919.89	7024.59	5435.81	6908.62	4242.38	2554.52		3.5	1	FALSE	0.0001042	9.917e-05
High	Unambiguous	[K].yGPADVEDTTGSGATDSk.[D]	N-Term(TMTpro); K18(TMTpro)	1	P24534	P24534	0	3	0.6347	0	1	1	793.731	2379.18	2379.18	-0.4	-0.00032	CID (Collision Induced Dissociation)	MS2	0	29.4	6.002	62.9167	11576	201015L_YASAM07425_YAII63-12.raw	F4.8	17320	10206.4	16448.7	16282.7	13568.4	24729.1	27450	17091.3	4926.42	11148.3	15335.6	23630.4	14720.7	23296.6	14311	11319.2		6.57	1	FALSE	0.0001042	2.12e-08
High	Unambiguous	[K].lESEmEDAYHEHQANLLR.[Q]	N-Term(TMTpro); M5(Oxidation)	1	P23246	P23246	0	3	0.6032	0	1	1	835.738	2505.2	2505.2	0.08	6e-05	CID (Collision Induced Dissociation)	MS2	0	20.3	10.725	62.8741	11555	201015L_YASAM07425_YAII63-12.raw	F4.8	5911.05	5075.53	7906.83	6459.08	6728.89	8200.48	9023.82	5322.8	2985.85	5685.24	7164.78	6788.19	7259.81	7374.96	7212.85	5798.15		4.36	1	FALSE	0.0001042	1.735e-05
High	Unambiguous	[K].lESEmEDAYHEHQANLLR.[Q]	N-Term(TMTpro); M5(Oxidation)	1	P23246	P23246	0	2	0.7937	0	1	1	1253.1	2505.2	2505.2	-0.55	-0.00069	CID (Collision Induced Dissociation)	MS2	0	1.9	71.78	62.8619	11551	201015L_YASAM07425_YAII63-12.raw	F4.8			626.178	877.599		903.093	1057.25	668.843		694.315	509.115	587.936		784.007	975.609			5.38	1	FALSE	0.0001042	3.919e-06
High	Unambiguous	[R].dLTTGYDDSQPDk.[K]	N-Term(TMTpro); K13(TMTpro)	1	Q96G03	Q96G03	0	2	0.5303	0	1	1	1032.02	2063.04	2063.04	-0.79	-0.00081	CID (Collision Induced Dissociation)	MS2	10.0322	13	54.563	62.8036	11526	201015L_YASAM07425_YAII63-12.raw	F4.8	2859.97	2549.61	3575.11	3764.24	3256.91	4783.56	5303.65	2833.3	710.185	2991.57	3621.34	4285.88	2957.72	5493.42	2921.94	2423.1		4.13	1	FALSE	0.0001042	3.812e-06
High	Unambiguous	[R].eENAEQQALAAk.[R]	N-Term(TMTpro); K12(TMTpro)	1	Q9UQE7	Q9UQE7	0	2	0.5189	0	1	1	955.527	1910.05	1910.05	-0.23	-0.00021	CID (Collision Induced Dissociation)	MS2	11.7678	21.4	55.391	62.7676	11509	201015L_YASAM07425_YAII63-12.raw	F4.8	4373.45	3605.33	5811.41	6851.54	3340.87	8357.72	7263.31	5168.93	1840.47	3322.65	5780.13	7779.09	5775.29	7074.68	4597	3348.37		4.49	1	FALSE	0.0001042	2.152e-06
High	Unambiguous	[K].yGPADVEDTTGSGATDSk.[D]	N-Term(TMTpro); K18(TMTpro)	1	P24534	P24534	0	2	0.7106	0	1	1	1190.09	2379.18	2379.18	-0.83	-0.00099	CID (Collision Induced Dissociation)	MS2	17.3413	3.6	98.301	62.7497	11502	201015L_YASAM07425_YAII63-12.raw	F4.8	796.402	806.348	949.358	981.68	757.636	1433.86	1767.84	877.388		866.875	881.499	1453.95	1109.01	1207.37		875.745		6.22	1	FALSE	0.0001042	4.446e-10
High	Unambiguous	[K].tDmDNQIVVSDYAQmDR.[V]	N-Term(TMTpro); M3(Oxidation); M15(Oxidation)	1	P50991	P50991	0	2	0.8015	0	1	1	1169.04	2337.07	2337.07	0.07	9e-05	CID (Collision Induced Dissociation)	MS2	0	2.6	72.5	63.3894	11791	201015L_YASAM07425_YAII63-12.raw	F4.8			627.658		829.537	938.106	978.834	1437.45	618.895	717.507	1117.11	1517.4	565.179		1121.89	620.575		3.93	1	FALSE	0.0001042	6.067e-06
High	Unambiguous	[K].eYEATLEEccAk.[D]	N-Term(TMTpro); C9(Carbamidomethyl); C10(Carbamidomethyl); K12(TMTpro)	1	P02769	P02769	0	3	0.6301	0	1	1	704.349	2111.03	2111.03	1.38	0.00097	CID (Collision Induced Dissociation)	MS2	7.73671	18.8	4.18	65.1626	12588	201015L_YASAM07425_YAII63-12.raw	F4.8	27886.3	23026.1	17985.8	27355	17787.6	27557.3	39315	23474.9	4702.75	16807	23343.9	24988.2	18771.6	34102.7	27886.7	10419.6		4.38	1	TRUE	0.0001042	3.858e-06
High	Unambiguous	[R].hQEGEIFDTEk.[E]	N-Term(TMTpro); K11(TMTpro)	1	Q02878	Q02878	0	3	0.5519	0	1	1	647.678	1941.02	1941.02	-0.04	-3e-05	CID (Collision Induced Dissociation)	MS2	3.36587	13.6	1.925	63.4069	11797	201015L_YASAM07425_YAII63-12.raw	F4.8	17744.9	7384.95	29145.9	26053.7	17519.1	36283.3	29681.3	21042.6	4321.82	13813.2	23469.4	42830.3	18422.6	24151.7	9557.45	15058.8		4.24	1	FALSE	0.0001042	3.504e-06
High	Unambiguous	[R].eAGDVcYADVQk.[D]	N-Term(TMTpro); C6(Carbamidomethyl); K12(TMTpro)	1	Q13242	Q13242	0	2	0.4946	0	1	1	982.008	1963.01	1963.01	-0.28	-0.00027	CID (Collision Induced Dissociation)	MS2	0	18	35.695	63.4376	11811	201015L_YASAM07425_YAII63-12.raw	F4.8	5359	3265.64	5028.63	4036.5	3704.61	3969.03	6035.99	4756.89	1632.36	3727.68	4216.34	5751.17	4466.22	7539.61	4675.95	2902.81		4.61	1	FALSE	0.0001042	1.704e-05
High	Unambiguous	[K].eGMNIVEAmER.[F]	N-Term(TMTpro); M9(Oxidation)	1	P62937	P62937	0	2	0.4952	0	1	1	799.896	1598.78	1598.78	0.76	0.00061	CID (Collision Induced Dissociation)	MS2	25.0468	43.7	12.338	63.8877	12011	201015L_YASAM07425_YAII63-12.raw	F4.8	11941.3	8311.82	12482.4	12154.1	10789.8	14343.8	12093.7	10267.8	5028.53	9894.68	11632	13648.6	10781.7	15287	14767.7	8653.44		4.14	1	FALSE	0.0001042	0.0003599
High	Unambiguous	[R].tVLVNADGEEVAmR.[T]	N-Term(TMTpro); M13(Oxidation)	1	Q03252	Q03252	0	2	0.5041	0	1	1	912.478	1823.95	1823.95	0.15	0.00014	CID (Collision Induced Dissociation)	MS2	11.6366	24.8	30.996	63.8689	12003	201015L_YASAM07425_YAII63-12.raw	F4.8	5006.67	5127.33	6000.58	6881.62	4864.71	7137.75	8055.66	5381.03	2839.67	6810.85	7054.81	6810.75	6736.08	7915.47	6135.97	5208.91		3.67	1	FALSE	0.0001042	0.0002985
High	Unambiguous	[RK].vEILANDQGNR.[TI]	N-Term(TMTpro)	2		P48741; P17066	0	3	0	0	1	1	511.618	1532.84	1532.84	2.21	0.00113	CID (Collision Induced Dissociation)	MS2	40.7704	28.1	10.003	63.8517	11995	201015L_YASAM07425_YAII63-12.raw	F4.8	8619.96	8273.12	11453.9	10471.2	8971.56	11274.5	10702.6	8819.38	3461.12	9670.18	11311.1	10893.6	8625.24	9163.05	8705.36	6801.1		3.65	1	FALSE	0.0001042	0.0003026
High	Unambiguous	[K].sLYHDISGDTSGDYR.[K]	N-Term(TMTpro)	1	P50995	P50995	0	3	0.5781	0	1	1	663.988	1989.95	1989.95	1.22	0.00081	CID (Collision Induced Dissociation)	MS2	37.5688	10.3	5.814	63.84	11990	201015L_YASAM07425_YAII63-12.raw	F4.8	17014.5	11116.7	18592	23188.8	14166.9	19891.9	18697.2	14775.3	5076.93	16410.3	21823.9	23032.2	15297.3	20336.6	14456.4	18430.5		3.84	1	FALSE	0.0001042	6.347e-05
High	Unambiguous	[K].sLYHDISGDTSGDYR.[K]	N-Term(TMTpro)	1	P50995	P50995	0	3	0.5057	0	1	1	663.988	1989.95	1989.95	0.76	0.0005	CID (Collision Induced Dissociation)	MS2	70.7214	9.9	5.293	63.7875	11968	201015L_YASAM07425_YAII63-12.raw	F4.8	19614.5	10974.7	24695.2	13501.2	13254.1	25107.8	22347.4	20161.1	7555.92	18962.5	23652.4	27910.6	18040.4	18260.6	13871.8	10666.5		3.52	1	FALSE	0.0001042	0.0001373
High	Unambiguous	[R].qDAQDLYEAGEk.[K]	N-Term(TMTpro); K12(TMTpro)	1	P09525	P09525	0	3	0.5243	0	1	1	659.015	1975.03	1975.03	1.33	0.00087	CID (Collision Induced Dissociation)	MS2	54.6101	16.8	6.029	63.7681	11959	201015L_YASAM07425_YAII63-12.raw	F4.8	7638.48	4963.38	8869.98	7403.77	8022.1	11892.6	10992	8143.3	3445.71	5014.34	10615.4	11238.4	9265.55	10337.4	8699.71	4402.74		4.12	1	FALSE	0.0001042	6.735e-05
High	Unambiguous	[K].eESDDEAAVEEEEEEkkPk.[T]	N-Term(TMTpro); K16(TMTpro); K17(TMTpro); K19(TMTpro)	1	P14625	P14625	1	4	0.5462	0	1	1	859.956	3436.8	3436.8	1.51	0.0013	CID (Collision Induced Dissociation)	MS2	18.6772	30.4	8.049	63.7616	11955	201015L_YASAM07425_YAII63-12.raw	F4.8	5163.21	4888.67	5058.61	6938.19	4485.8	10953.9	17314.5	6904.25	2459.11	3553.08	6218.27	9499.07	7294.93	13015.1	12277.1	4042.22		4.87	1	FALSE	0.0001042	6.227e-05
High	Unambiguous	[K].kDkDDDGGEDDDANcNLIcGDEYGPETR.[L]	N-Term(TMTpro); K1(TMTpro); K3(TMTpro); C15(Carbamidomethyl); C19(Carbamidomethyl)	1	Q08211	Q08211	2	4	0.6564	0	1	1	1022.22	4085.87	4085.88	-1.44	-0.00147	CID (Collision Induced Dissociation)	MS2	23.8209	11.5	26.987	63.7284	11940	201015L_YASAM07425_YAII63-12.raw	F4.8	2968.27	1843.39	3343.09	1816.01	2305.53	5019.38	4886.38	2094.63		1537.74	3358.75	4443.06	3405.92	3534.71	3004.02	1483.67		5.5	1	FALSE	0.0001042	3.204e-07
High	Unambiguous	[K].eDSNLTLQEk.[K]	N-Term(TMTpro); K10(TMTpro)	1	P46940	P46940	0	2	0.3771	0	1	1	892.998	1784.99	1784.99	0.14	0.00013	CID (Collision Induced Dissociation)	MS2	32.554	32.8	27.198	63.6662	11913	201015L_YASAM07425_YAII63-12.raw	F4.8	8431.37	7365.62	8239.15	8252.04	5806.74	10890.6	12393.1	6003.86	2184.6	6308.54	8622.91	11218	8347.27	11835.6	8425.28	4807.28		3.5	1	FALSE	0.0001042	0.0002262
High	Unambiguous	[K].aDEASELAcPTPk.[E]	N-Term(TMTpro); C9(Carbamidomethyl); K13(TMTpro)	1	P49327	P49327	0	2	0.4021	0	1	1	999.029	1997.05	1997.05	-0.39	-0.00039	CID (Collision Induced Dissociation)	MS2	0	13.2	97.692	63.6099	11889	201015L_YASAM07425_YAII63-12.raw	F4.8	2839.32	2734.19	3519.49	2197.3	1890	3828.03	5628.6	2969.51	1371.52	1631.37	3294.4	4637.44	4205.12	4882.89	3894.66	2903.24		3.83	1	FALSE	0.0001042	6.007e-06
High	Unambiguous	[K].eYAEDDNIYQQk.[I]	N-Term(TMTpro); K12(TMTpro)	1	Q96FW1	Q96FW1	0	2	0.5401	0	1	1	1062.54	2124.07	2124.07	-0.83	-0.00088	CID (Collision Induced Dissociation)	MS2	21.615	11	74.58	63.5575	11864	201015L_YASAM07425_YAII63-12.raw	F4.8	2752.52	2512.3	3676.99	3244.55	2521.87	3321.14	3232.16	2934.77	789.109	2306.35	3073.83	3611.68	2626.15	3492.74	2908.42	1954.74		4.74	1	FALSE	0.0001042	2.375e-06
High	Unambiguous	[K].vSEEAESQQQWDTSk.[G]	N-Term(TMTpro); K15(TMTpro)	1	Q01082	Q01082	0	2	0.5667	0	1	1	1180.6	2360.18	2360.19	-0.55	-0.00065	CID (Collision Induced Dissociation)	MS2	0	2.5	119.5	63.5522	11862	201015L_YASAM07425_YAII63-12.raw	F4.8			1194.45	842.196		846.906	824.458	642.859		755.068	1213.51	1207.46	874.214	1106.15	470.025			4.8	1	FALSE	0.0001042	3.213e-07
High	Unambiguous	[K].eGIcAIGGTSEQSSVGTQHSYSEEEk.[Y]	N-Term(TMTpro); C4(Carbamidomethyl); K26(TMTpro)	1	P13796	P13796	0	3	0.7033	0	1	1	1126.88	3378.62	3378.63	-0.55	-0.00062	CID (Collision Induced Dissociation)	MS2	0	10.8	57.773	63.4909	11835	201015L_YASAM07425_YAII63-12.raw	F4.8	2933.51	1951.6	3347.16	2961.79	1226.35	3330.83	4664.34	2411.46	726.094	1889.78	3310.5	4455.34	2534.78	2965.48	3737.92	1464.84		8.36	1	FALSE	0.0001042	2.441e-10
High	Unambiguous	[K].tEEmPNDSVLENk.[S]	N-Term(TMTpro); M4(Oxidation); K13(TMTpro)	1	P49321	P49321	0	2	0.4913	0	1	1	1065.55	2130.09	2130.09	-1.07	-0.00114	CID (Collision Induced Dissociation)	MS2	35.9525	12.4	53.173	63.4559	11819	201015L_YASAM07425_YAII63-12.raw	F4.8	2769.23	2269.79	4238.83	3461.88	2738.43	3898.76	4617.16	2995.84	1081.32	2640.61	3615.32	4042.08	2687.89	4488.64	3728.91	2544.94		4.62	1	FALSE	0.0001042	0.0002528
High	Unambiguous	[R].vILGSEAAQQHPEEVR.[G]	N-Term(TMTpro)	1	Q9NY33	Q9NY33	0	3	0.6588	0	1	1	689.711	2067.12	2067.12	1.75	0.0012	CID (Collision Induced Dissociation)	MS2	72.1654	12.6	5.673	63.4396	11812	201015L_YASAM07425_YAII63-12.raw	F4.8	7167.41	4915.95	8890.05	7161.72	5076.65	7022.88	9689.16	8291.94	3754.96	5819.28	6611.79	11365.4	9146.65	7416.64	8247.32	5370.1		5.51	1	FALSE	0.0001042	8.786e-07
High	Unambiguous	[R].hQEGEIFDTEk.[E]	N-Term(TMTpro); K11(TMTpro)	1	Q02878	Q02878	0	2	0.5553	0	1	1	971.014	1941.02	1941.02	0.31	0.0003	CID (Collision Induced Dissociation)	MS2	7.55706	38.6	31.174	63.4086	11799	201015L_YASAM07425_YAII63-12.raw	F4.8	9779.4	7187.87	14281.8	10907	7364.68	13226.7	13644.4	10560.7	2670.77	7789.24	10273.7	15793	8660.38	11411.5	5999.38	5576.65		4.43	1	FALSE	0.0001042	6.603e-05
High	Unambiguous	[K].rDNSDFDLLTVSETANEPPQDEGNSFNSPR.[N]	N-Term(TMTpro)	1	O15371	O15371	1	3	0.7659	0	1	1	1219.24	3655.7	3655.71	-0.57	-0.00069	CID (Collision Induced Dissociation)	MS2	0	1.5	119.5	73.0322	15090	201015L_YASAM07425_YAII63-12.raw	F4.8				624.02	743.346	721.997	894.061	890.482					1211.82	1047.96				6.75	1	FALSE	0.0001042	3.674e-11
High	Unambiguous	[K].aYVDDTPAEQMk.[A]	N-Term(TMTpro); K12(TMTpro)	1	P07814	P07814	0	2	0.479	0	1	1	988.518	1976.03	1976.03	-0.1	-0.0001	CID (Collision Induced Dissociation)	MS2	11.0364	19.8	71.953	65.1661	12590	201015L_YASAM07425_YAII63-12.raw	F4.8	5131.86	3231.39	5775.46	4622.76	4219.57	6828.97	7969.59	4797.03	1755.63	3263.07	6831.39	6791.15	4487.53	6659.36	7037.45	3546.01		4.53	1	FALSE	0.0001042	1.75e-05
High	Unambiguous	[R].sFAGAVSPQEEEEFRR.[L]	N-Term(TMTpro)	1	P33992	P33992	1	2	0.4394	0	1	1	1072.04	2143.07	2143.07	-1.32	-0.00141	CID (Collision Induced Dissociation)	MS2	0	5.1	73.28	65.3534	12674	201015L_YASAM07425_YAII63-12.raw	F4.8	1663.06	1775.44	1369.4	1049.66	1371.5	1362.37	1454.56	1060.49	450.483	948.565	2023.37	1306.56	1087.81	1584.79	1194.98	714.841		3.71	1	FALSE	0.0001042	8.351e-05
High	Unambiguous	[K].dIPNENEAQFQIR.[D]	N-Term(TMTpro)	1	Q10567	Q10567	0	2	0.4425	0	1	1	939.486	1877.96	1877.97	-1.54	-0.00144	CID (Collision Induced Dissociation)	MS2	0	15.2	60.414	67.1373	13415	201015L_YASAM07425_YAII63-12.raw	F4.8	4115.18	3723.04	4373.14	3159.9	2306.1	4064.33	5368.74	3691.31	1816.6	3721.2	4725.11	4862.04	3789.39	6053.84	3280.47	3108.62		3.48	1	FALSE	0.0001042	5.57e-05
High	Unambiguous	[K].tEEMPNDSVLENk.[S]	N-Term(TMTpro); K13(TMTpro)	1	P49321	P49321	0	3	0.377	0	1	1	705.37	2114.1	2114.09	1.01	0.00072	CID (Collision Induced Dissociation)	MS2	0	10.4	9.967	67.1298	13411	201015L_YASAM07425_YAII63-12.raw	F4.8	2773.52	3089.15	4790.36	2775.03	4631.39	6355.12	5482.17	3227.68	1201.17	2442.6	3678.21	5043.29	4220.58	4353.01	4075.52	3235.43		3.82	1	FALSE	0.0001042	0.000209
High	Unambiguous	[K].eESSELEQPFAQDTSSVGPDRk.[L]	N-Term(TMTpro); K22(TMTpro)	2	Q15424; Q14151	Q15424; Q14151	1	3	0.6241	0	1	1	1015.51	3044.53	3044.53	-0.21	-0.00022	CID (Collision Induced Dissociation)	MS2	60.2078	14	94.11	67.1009	13400	201015L_YASAM07425_YAII63-12.raw	F4.8	3433.95	2656.6	2020.58	3705.48	3334.31	4796.29	5512.4	3523.67	841.976	3362.37	3232.3	4148.85	3504.08	3971.9	4352.34	3050.71		5.32	2	FALSE	0.0001042	1.103e-07
High	Unambiguous	[K].tEEMPNDSVLENk.[S]	N-Term(TMTpro); K13(TMTpro)	1	P49321	P49321	0	2	0.4483	0	1	1	1057.55	2114.09	2114.09	0.21	0.00022	CID (Collision Induced Dissociation)	MS2	0	14.1	119.5	67.0873	13396	201015L_YASAM07425_YAII63-12.raw	F4.8	3496.55	2500.31	3081.87	3797.79	3303.59	4975.53	6038.61	2776.95	1183.65	2200.17	3368.45	6026.56	2444.48	5584.03	3998.65	1594.04		5.13	1	FALSE	0.0001042	1.369e-06
High	Unambiguous	[R].sVGDNSSDLSNVAVIDGNR.[V]	N-Term(TMTpro)	1	O95163	O95163	0	2	0.6019	0	1	1	1112.06	2223.12	2223.12	0.99	0.0011	CID (Collision Induced Dissociation)	MS2	21.7944	4.2	119.5	66.988	13358	201015L_YASAM07425_YAII63-12.raw	F4.8	1184.09	627.543	1850.33	1347.21	923.119	1631.7	1006.87	1376.56		854.032	1065.83	1152.91	680.643	1157.34	1032	1283.17		4.17	1	FALSE	0.0001042	1.791e-08
High	Unambiguous	[K].iQALQQQADEAEDR.[A]	N-Term(TMTpro)	1	P67936	P67936	0	2	0.511	0	1	1	959.994	1918.98	1918.98	1.14	0.00109	CID (Collision Induced Dissociation)	MS2	19.4636	33.4	23.521	66.9803	13353	201015L_YASAM07425_YAII63-12.raw	F4.8	8353.59	6171.33	8479.93	9574.87	6607.47	9394.13	8218.93	7725.69	3891.95	7155.22	10543.3	10509.9	8975.01	9062.13	7795.28	7305.02		4.56	1	FALSE	0.0001042	8.466e-06
High	Unambiguous	[K].sGYQDMPEYENFR.[H]	N-Term(TMTpro)	1	Q15436	Q15436	0	2	0.6434	0	1	1	970.444	1939.88	1939.88	-0.89	-0.00087	CID (Collision Induced Dissociation)	MS2	0	12.6	74.12	67.15	13420	201015L_YASAM07425_YAII63-12.raw	F4.8	3094.48	2476.48	4132.71	3000.11	2097.49	4005.86	3947.48	3140.14	1501.17	3244.47	3410.27	3660.39	3432.45	3555.21	3407.56	2511.97		4.15	1	FALSE	0.0001042	4.571e-06
High	Unambiguous	[K].gAEEmETVIPVDVmR.[R]	N-Term(TMTpro); M5(Oxidation); M14(Oxidation)	1	Q99497	Q99497	0	2	0.5062	0	1	1	1006.5	2012	2012	-0.25	-0.00025	CID (Collision Induced Dissociation)	MS2	7.80113	11.3	119.5	66.9443	13339	201015L_YASAM07425_YAII63-12.raw	F4.8	2478.39	2568.14	3311.17	2170.05	2859.09	2992.56	3285.68	2998.89	1152.58	2611.39	2996.8	4040.98	2427.47	3934.44	2441.4	2841.9		3.22	1	FALSE	0.0001042	0.0003384
High	Unambiguous	[K].yGSGSGQQSVTGVEASDDANSYWR.[I]	N-Term(TMTpro)	1	Q9HCN8	Q9HCN8	0	3	0.859	0	1	1	942.436	2825.29	2825.29	-0.45	-0.00042	CID (Collision Induced Dissociation)	MS2	12.229	12.1	119.5	66.9291	13335	201015L_YASAM07425_YAII63-12.raw	F4.8	3045.28	2767.56	3221.11	3254.05	2708.2	3679.33	3018.25	2769.92	2047.13	3833.08	3182.21	4164.37	3158.09	3013.84	2186.32	2188.88		7.59	1	FALSE	0.0001042	2.197e-08
High	Unambiguous	[K].dISTTLNADEAVAR.[G]	N-Term(TMTpro)	2	O95757; Q92598	O95757; Q92598	0	2	0.6341	0	1	1	890.474	1779.94	1779.94	-0.1	-9e-05	CID (Collision Induced Dissociation)	MS2	46.9634	43.3	20.698	66.854	13305	201015L_YASAM07425_YAII63-12.raw	F4.8	8764.5	7938.57	12603.8	12125.2	8063.42	13400.9	12670.9	10187.6	5151.36	8654.38	13299.6	13491	12734.7	12372.5	10395.1	8550.12		4.92	2	FALSE	0.0001042	2.972e-07
High	Unambiguous	[K].yGSGSGQQSVTGVEASDDANSYWR.[I]	N-Term(TMTpro)	1	Q9HCN8	Q9HCN8	0	2	0.7759	0	1	1	1413.15	2825.3	2825.29	0.74	0.00105	CID (Collision Induced Dissociation)	MS2	0	1.7	70.46	66.7908	13282	201015L_YASAM07425_YAII63-12.raw	F4.8	531.584	581.829	522.966			540.371	526.05	789.265				805.24	714.258	981.16	929.52			5.98	1	FALSE	0.0001042	3.088e-05
High	Unambiguous	[K].gTEAPAVVTEEEDDDEETAPPVIAPRPDHTk.[S]	N-Term(TMTpro); K31(TMTpro)	1	Q13177	Q13177	0	4	0.6402	0	1	1	981.747	3923.97	3923.96	0.32	0.00032	CID (Collision Induced Dissociation)	MS2	0	12.2	119.5	66.7672	13276	201015L_YASAM07425_YAII63-12.raw	F4.8	3374.88	2686	2942.94	3583.4	2820.2	3827.87	4175.34	3023.09	1437.96	2366.42	3837.04	3898.7	2280.17	3425.58	3629.58	2229.52		5.28	1	FALSE	0.0001042	7.144e-08
High	Unambiguous	[K].dVLLQVDDERR.[N]	N-Term(TMTpro)	1	P35579	P35579	1	3	0.424	0	1	1	554.643	1661.91	1661.91	-0.15	-8e-05	CID (Collision Induced Dissociation)	MS2	10.955	11.7	8.464	66.6706	13238	201015L_YASAM07425_YAII63-12.raw	F4.8	9223.02	8305.88	9298.17	12155.2	12947.3	14398.3	10439.7	8305.48	4711.87	10916.1	12079.9	13898.5	12502.6	13670.5	13796.1	7351.65		4.41	1	FALSE	0.0001042	5.997e-05
High	Unambiguous	[K].eLSTTLNADEAVTR.[G]	N-Term(TMTpro)	1	P34932	P34932	0	2	0.4977	0	1	1	912.485	1823.96	1823.97	-2.82	-0.00257	CID (Collision Induced Dissociation)	MS2	37.8629	35.4	31.072	66.6491	13229	201015L_YASAM07425_YAII63-12.raw	F4.8	9237.02	8373.33	10770.3	8891.87	8531.11	9428.49	8321.14	7247.24	3854.76	8234.93	10678.9	11373	8048.77	8324.49	10589	8479.36		4.36	1	FALSE	0.0001042	1.123e-05
High	Unambiguous	[R].nVSSFPDDATSPLQENR.[N]	N-Term(TMTpro)	1	P52292	P52292	0	2	0.6744	0	1	1	1091.04	2181.08	2181.07	0.54	0.00059	CID (Collision Induced Dissociation)	MS2	15.8051	9.1	73.13	66.9331	13336	201015L_YASAM07425_YAII63-12.raw	F4.8	2614.55	2452.22	3127.86	1472.85	2282.32	3320.73	2402.76	2345.69	677.696	1620.18	3160.48	3013.72	2285.32	2684.44	1553.45	1684.12		5.16	1	FALSE	0.0001042	1.358e-06
High	Unambiguous	[K].eIcNAYTELNDPmR.[Q]	N-Term(TMTpro); C3(Carbamidomethyl); M13(Oxidation)	1	Q15046	Q15046	0	2	0.4947	0	1	1	1023.48	2045.96	2045.96	0.42	0.00043	CID (Collision Induced Dissociation)	MS2	0	9.6	73.7	67.1762	13433	201015L_YASAM07425_YAII63-12.raw	F4.8	2662.02	2188.58	2528.9	2907.14	2183.35	2642.82	3035.33	3094.03	1341.83	2120.27	2825.48	2286.78	2183.57	2466.95	2093.28	1469.82		3.8	1	FALSE	0.0001042	3.767e-05
High	Unambiguous	[K].gEENLMDAQVk.[A]	N-Term(TMTpro); K11(TMTpro)	1	P50990	P50990	0	2	0.3832	0	1	1	921.501	1842	1841.99	1.57	0.00145	CID (Collision Induced Dissociation)	MS2	42.5249	24	98.103	67.1916	13439	201015L_YASAM07425_YAII63-12.raw	F4.8	6553.16	3951.08	7024.38	6307.92	4559.78	6402.92	8144.83	5464.71	829.453	5620.59	7127.04	8629.01	6407.26	8309.16	5085.47	2941.36		2.74	1	FALSE	0.0001042	0.0003558
High	Unambiguous	[K].lYHDPNVNGGTELEPVEGNPYR.[R]	N-Term(TMTpro)	1	P57740	P57740	0	3	0.645	0	1	1	925.462	2774.37	2774.37	0.85	0.00078	CID (Collision Induced Dissociation)	MS2	30.1228	12	58.251	67.2133	13448	201015L_YASAM07425_YAII63-12.raw	F4.8	3262.23	3662.69	3518.08	4076.09	2565.42	4350.8	2754.35	3153.95	1441.81	2282.25	3269.17	3938.1	2538.15	3945.8	2505.16	1759.41		6.62	1	FALSE	0.0001042	8.419e-07
High	Unambiguous	[K].fSNQETcVEIGESVR.[G]	N-Term(TMTpro); C7(Carbamidomethyl)	1	P60891	P60891	0	2	0.4424	0	1	1	1030.01	2059.01	2059.01	-0.09	-9e-05	CID (Collision Induced Dissociation)	MS2	0	8.4	73.64	67.5995	13582	201015L_YASAM07425_YAII63-12.raw	F4.8	1613.77	2237.63	2842.67	2332.75	1922.03	2350.38	3185.92	1791.4	839.002	2052.81	2910.99	2202.29	1756.73	1683.81	1906.55	1422.87		4.86	1	FALSE	0.0001042	7.807e-07
High	Unambiguous	[K].hNDDEQYAWESSAGGSFTVR.[TA]	N-Term(TMTpro)	3	P07900; P08238	P07900; P08238; Q14568	0	3	0.7822	0	1	1	854.06	2560.16	2560.17	-0.49	-0.00042	CID (Collision Induced Dissociation)	MS2	25.0398	32.4	12.79	67.5979	13581	201015L_YASAM07425_YAII63-12.raw	F4.8	7994.48	9266.97	9442.91	8287.42	7001.27	10280.9	10205.9	7697.58	3926.96	8533.82	10088.9	10966.1	9894.12	9392.07	7330.99	4960.16		6.29	2	FALSE	0.0001042	2.693e-06
High	Unambiguous	[R].qAQQERDELADEIANSSGk.[G]	N-Term(TMTpro); K19(TMTpro)	1	P35579	P35579	1	3	0.5126	0	1	1	899.801	2697.39	2697.39	-1.58	-0.00142	CID (Collision Induced Dissociation)	MS2	29.9328	34.1	54.324	67.5733	13574	201015L_YASAM07425_YAII63-12.raw	F4.8	8909.48	7102.51	9159.7	7505.46	5408.46	11795.6	15502.3	7798.09	3421.33	4556.5	10682.7	11641.2	8694.33	11135.4	7728.24	5420.4		5.15	1	FALSE	0.0001042	6.455e-06
High	Unambiguous	[R].eITENLmATGDLDQDGR.[I]	N-Term(TMTpro); M7(Oxidation)	1	P13796	P13796	0	2	0.7065	0	1	1	1099.53	2198.06	2198.06	0.04	4e-05	CID (Collision Induced Dissociation)	MS2	0	7.9	73.07	67.5617	13571	201015L_YASAM07425_YAII63-12.raw	F4.8	1163.73	1572.6	2566.59	2583.15	1795.46	1718.68	1730.82	2351.5	969.884	2164.66	2571.05	3702.33	2188.85	2094.08	1916.78	853.642		4.6	1	FALSE	0.0001042	6.168e-06
High	Unambiguous	[K].hNDDEQYAWESSAGGSFTVR.[TA]	N-Term(TMTpro)	3	P07900; P08238	P07900; P08238; Q14568	0	2	0.804	0	1	1	1280.59	2560.17	2560.17	-0.06	-8e-05	CID (Collision Induced Dissociation)	MS2	0	4.7	119.5	67.5388	13563	201015L_YASAM07425_YAII63-12.raw	F4.8	591.045	998.637	1092.17	1435.27	875.497	1594.26	1474.05	1301.83	835.816	1205.06	1584.29	951.7	1247.21	955.935	1417.09	1132.02		5.51	2	FALSE	0.0001042	5.547e-06
High	Unambiguous	[R].mAEIGEHVAPSEAANSLEQAQAAAER.[L]	N-Term(TMTpro); M1(Oxidation)	1	P27708	P27708	0	3	0.6368	0	1	1	1000.82	3000.46	3000.47	-2.85	-0.00285	CID (Collision Induced Dissociation)	MS2	14.3108	6.2	95.387	67.5034	13551	201015L_YASAM07425_YAII63-12.raw	F4.8	1016.01	1946.31	1808.41	1479.92	1318.89	2174.14	1855.87	2274.14	972.086	1810.91	1631.62	1168.72	1651.55	2055.17	1536.39	1295.58		5.92	1	FALSE	0.0001042	1.407e-06
High	Unambiguous	[K].iVYGHLDDPASQEIER.[G]	N-Term(TMTpro)	1	Q99798	Q99798	0	3	0.4524	0	1	1	716.042	2146.11	2146.11	1.36	0.00098	CID (Collision Induced Dissociation)	MS2	24.9445	5.6	22.627	67.4996	13549	201015L_YASAM07425_YAII63-12.raw	F4.8	2215.54	1993.42	2088.2	1944.35	1326.03	3437.71	2422.64	1422.24	1968.03	1314.11	3601.38	2673.39	2153.94	2465.27		1995.59		3.47	1	FALSE	0.0001042	1.781e-06
High	Unambiguous	[K].tGDLGDINAEQLPGR.[E]	N-Term(TMTpro)	1	Q9Y263	Q9Y263	0	2	0.5806	0	1	1	930.493	1859.98	1859.98	0.12	0.00011	CID (Collision Induced Dissociation)	MS2	13.3703	11.9	96.226	67.4324	13525	201015L_YASAM07425_YAII63-12.raw	F4.8	3122.08	2136.55	3123.76	4016.04	2639.61	4008.45	3646.29	1899.41	1493.16	2913.3	2366.92	4992.92	2608.9	3817.35	1820.36	2548.79		3.91	1	FALSE	0.0001042	7.937e-06
High	Unambiguous	[K].eAIEGTYIDk.[K]	N-Term(TMTpro); K10(TMTpro)	1	P62280	P62280	0	2	0.4713	0	1	1	873.992	1746.98	1746.98	-0.33	-0.00028	CID (Collision Induced Dissociation)	MS2	0	22.9	69.149	67.4192	13521	201015L_YASAM07425_YAII63-12.raw	F4.8	4621.71	4526.7	6589.65	5912.98	5313.36	6941.91	7832.95	5768.67	1784.9	4153.86	5803.44	8234.35	5302.98	7957.43	6517.33	4629.11		3.14	1	FALSE	0.0001042	0.000137
High	Unambiguous	[R].hPHDIIDDINSGAVEcPAS.[-]	N-Term(TMTpro); C16(Carbamidomethyl)	1	P30050	P30050	0	2	0.7043	0	1	1	1176.07	2351.13	2351.13	0.77	0.0009	CID (Collision Induced Dissociation)	MS2	0	2.6	72.41	67.3743	13509	201015L_YASAM07425_YAII63-12.raw	F4.8	1472.1	646.347	591.557	842.49		801.99	921.428	750.142			788.494	832.552	773.436	1201.7		736.134		5.14	1	FALSE	0.0001042	1.288e-06
High	Unambiguous	[K].eGLELPEDEEEkk.[KI]	N-Term(TMTpro); K12(TMTpro); K13(TMTpro)	5	P07900; P08238	Q58FG0; P07900; P08238; Q58FF6; Q58FF7	1	2	0.5653	0	1	1	1229.18	2457.36	2457.35	0.59	0.00073	CID (Collision Induced Dissociation)	MS2	20.6419	7.4	119.5	67.2974	13478	201015L_YASAM07425_YAII63-12.raw	F4.8	643.757	1234.8	1421.04	1873.06	1767.84	3183.25	3403.17	1212.88	560.016	1381.77	1132.36	3302.48	1303.71	2729.16	2292.83	584.266		4.67	2	FALSE	0.0001042	0.0001906
High	Unambiguous	[K].aENNSEVGASGYGVPGPTWDR.[G]	N-Term(TMTpro)	1	Q08211	Q08211	0	2	0.7625	0	1	1	1234.09	2467.18	2467.18	0.02	3e-05	CID (Collision Induced Dissociation)	MS2	22.8065	3.3	119.5	67.2844	13474	201015L_YASAM07425_YAII63-12.raw	F4.8	959.837	859.063	833.576	1087.09	1155.18	617.264	662.715	787.59		1143.29		1130.14	1568.94	1335.45	950.371			6.02	1	FALSE	0.0001042	4.133e-08
High	Unambiguous	[R].iEDVTPIPSDSTR.[R]	N-Term(TMTpro)	1	P62263	P62263	0	3	0.3724	0	1	1	578.647	1733.93	1733.92	0.8	0.00046	CID (Collision Induced Dissociation)	MS2	51.6555	9.6	17.395	67.2742	13471	201015L_YASAM07425_YAII63-12.raw	F4.8	3353.69	2336.99	3561.31	3317.26	2721.33	3508.8	3396.02	3463.78	1034.12	2758.96	2982.96	3090.21	2844.84	3276.82	2246.39	1810.04		3.41	1	FALSE	0.0001042	1.355e-05
High	Unambiguous	[R].gISHVIVDEIHER.[D]	N-Term(TMTpro)	1	Q08211	Q08211	0	3	0.3549	0	1	1	603.339	1808	1808	2.03	0.00122	CID (Collision Induced Dissociation)	MS2	30.5715	9.3	17.491	67.2315	13455	201015L_YASAM07425_YAII63-12.raw	F4.8	4197.31	3524.88	3520.2	4427.93	3334.2	3434.68	3383.41	3268.13	2132.48	3991.82	4096.86	2718.06	2694.3	3162.51	2981.69	2078.77		3.24	1	FALSE	0.0001042	7.004e-06
High	Unambiguous	[K].nMQDMVEDYR.[N]	N-Term(TMTpro)	4	P04264	P04264; 1346343; 71536; 88054	0	2	0.5753	0	1	1	802.873	1604.74	1604.74	1.19	0.00095	CID (Collision Induced Dissociation)	MS2	15.2857	24	14.967	67.2298	13454	201015L_YASAM07425_YAII63-12.raw	F4.8	5696.93	2982.02	9455.54	9134.7	6429.78	5899.61	6829.72	6686.55	3038.96	7166.88	15945.2	10982.6	4531.1	7270.24	4918.23	5125.54		2.92	1	TRUE	0.0001042	0.0002171
High	Unambiguous	[K].aALSEEELEk.[K]	N-Term(TMTpro); K10(TMTpro)	1	Q04637	Q04637	0	2	0.3118	0	1	1	863.99	1726.97	1726.97	0.21	0.00018	CID (Collision Induced Dissociation)	MS2	0	28	46.898	66.6004	13209	201015L_YASAM07425_YAII63-12.raw	F4.8	6354.48	4689.82	9320.68	8317.8	6592.62	11308.8	9919.76	7393.45	1483.14	5262.68	6921.29	10030.1	6521.01	10281.1	8032.24	4494.11		3.56	1	FALSE	0.0001042	0.0003811
High	Unambiguous	[K].eLSTTLNADEAVTR.[G]	N-Term(TMTpro)	1	P34932	P34932	0	2	0.5314	0	1	1	912.485	1823.96	1823.97	-2.69	-0.00245	CID (Collision Induced Dissociation)	MS2	10.9953	35.2	43.166	66.562	13195	201015L_YASAM07425_YAII63-12.raw	F4.8	7879.52	8877.37	10043	9427.47	7086.02	10939.9	9735.96	7520.39	3957.05	8428.99	10784.2	10818.8	9045.96	10001.2	9530.62	6902.24		3.82	1	FALSE	0.0001042	5.869e-05
High	Unambiguous	[K].mDATANDVPSPYEVR.[G]	N-Term(TMTpro)	1	P30101	P30101	0	3	0.4524	0	1	1	656.994	1968.97	1968.97	0.78	0.00051	CID (Collision Induced Dissociation)	MS2	0	7.3	13.761	66.5413	13187	201015L_YASAM07425_YAII63-12.raw	F4.8	2133.37	1817.4	2956.1	3267.6	3281.23	3311.27	3610.09	1909.68	1553.96	2742.04	2970.4	3205.89	2187.87	3572.28	2852.2	2179.59		2.52	1	FALSE	0.0001042	0.0001886
High	Unambiguous	[K].aTLELTHNWGTEDDETQSYHNGNSDPR.[G]	N-Term(TMTpro)	1	Q04760	Q04760	0	3	0.8137	0	1	1	1131.18	3391.53	3391.54	-1.89	-0.00213	CID (Collision Induced Dissociation)	MS2	28.4363	6.6	119.5	66.5339	13184	201015L_YASAM07425_YAII63-12.raw	F4.8	1611.54	1638.65	2379.57	1287.37	1284.02	2497.28	2218.59	1747.73	686.596	1353.72	2381.07	2338.65	1921.87	1786.31	1464.88	873.183		6.12	1	FALSE	0.0001042	0.0001465
High	Unambiguous	[K].eccHGDLLEcADDRADLAk.[Y]	N-Term(TMTpro); C2(Carbamidomethyl); C3(Carbamidomethyl); C10(Carbamidomethyl); K19(TMTpro)	1	P02769	P02769	1	2	0.6197	0	1	1	1428.68	2856.36	2856.36	0.84	0.0012	CID (Collision Induced Dissociation)	MS2	20.2001	2.1	70.34	65.7889	12865	201015L_YASAM07425_YAII63-12.raw	F4.8	556.321			976.831		507.432	605.41				1149.41	1299.29	843.296	651.857	1358.82	433.303		4.26	1	TRUE	0.0001042	0.000111
High	Unambiguous	[K].aTEPPSPDAGELSLASR.[L]	N-Term(TMTpro)	1	Q8IYB8	Q8IYB8	0	2	0.6071	0	1	1	1001.52	2002.04	2002.04	0.66	0.00066	CID (Collision Induced Dissociation)	MS2	68.5776	8	119.5	65.7804	12862	201015L_YASAM07425_YAII63-12.raw	F4.8	2753.38	1792.6	2260.21	2590.04	1778.24	2258.47	2170.63	1815.82	762.791	1544.78	1938.03	2271.15	1667.38	1734.95	2411.59	1885.47		4.2	1	FALSE	0.0001042	1.326e-06
High	Unambiguous	[K].eDGQEYAQVIk.[M]	N-Term(TMTpro); K11(TMTpro)	2	P47813	P47813; O14602	0	2	0.4394	0	1	1	944.519	1888.03	1888.03	0.48	0.00045	CID (Collision Induced Dissociation)	MS2	17.1872	18.6	26.377	65.7366	12842	201015L_YASAM07425_YAII63-12.raw	F4.8	3143.62	4556.93	5289.11	4967.79	3564.53	5136.08	5694.79	4678.62	1875.28	2753.87	4650.42	5296.9	4138.79	5762.73	4798.19	4697.31		3.96	1	FALSE	0.0001042	0.0002406
High	Unambiguous	[R].yLmEEDEDAYk.[K]	N-Term(TMTpro); M3(Oxidation); K11(TMTpro)	1	P46777	P46777	0	2	0.5465	0	1	1	1015.5	2029.99	2029.99	-1.14	-0.00116	CID (Collision Induced Dissociation)	MS2	0	15.4	119.5	65.7082	12829	201015L_YASAM07425_YAII63-12.raw	F4.8	4457.06	4106.78	4908.89	3805.21	3178.04	5517.88	5390.44	4220.12		1826.14	3355.92	5383.38	4014.25	5627.48	3213.1	2314.04		3.33	1	FALSE	0.0001042	6.282e-05
High	Unambiguous	[R].vDSAATSGYEIGNPPDYR.[G]	N-Term(TMTpro)	1	P24666	P24666	0	2	0.6561	0	1	1	1108.54	2216.08	2216.08	-1.17	-0.0013	CID (Collision Induced Dissociation)	MS2	9.82866	10.1	94.325	65.6759	12814	201015L_YASAM07425_YAII63-12.raw	F4.8	1903.49	3298.88	2922.89	2850.18	2217.18	3579.77	2240.3	2483.42	1530.96	2140.82	3065.5	3583.94	2633.48	3342.76	2292.56	1406.68		5.38	1	FALSE	0.0001042	5.859e-07
High	Unambiguous	[K].gESDPAYQQYQDAANNLR.[E]	N-Term(TMTpro)	1	P13667	P13667	0	2	0.6648	0	1	1	1172.56	2344.11	2344.11	-0.37	-0.00043	CID (Collision Induced Dissociation)	MS2	0	4.4	119.5	65.6265	12794	201015L_YASAM07425_YAII63-12.raw	F4.8	802.578	1094.99	1465.89	868.913	1724.27	610.454	868.6	1283.33	740.674	1429.97	996.359	1877.42	961.1	1190.36		1418.42		5.37	1	FALSE	0.0001042	1.167e-06
High	Unambiguous	[K].eccHGDLLEcADDRADLAk.[Y]	N-Term(TMTpro); C2(Carbamidomethyl); C3(Carbamidomethyl); C10(Carbamidomethyl); K19(TMTpro)	1	P02769	P02769	1	4	0.6822	0	1	1	714.845	2856.36	2856.36	0.88	0.00063	CID (Collision Induced Dissociation)	MS2	19.0158	10.8	1.501	65.6233	12791	201015L_YASAM07425_YAII63-12.raw	F4.8	38735.7	65425.9	23935.4	32771.3	28029.9	42982.9	62647.8	29803.9	8341.54	19693.9	50947.1	39903	32858.7	64925	74497.8	14741.5		4.72	1	TRUE	0.0001042	2.215e-06
High	Unambiguous	[K].vGAENVAIVEPSER.[H]	N-Term(TMTpro)	1	Q9Y6N5	Q9Y6N5	0	2	0.5297	0	1	1	887.485	1773.96	1773.97	-1.85	-0.00164	CID (Collision Induced Dissociation)	MS2	0	19	41.632	65.6057	12785	201015L_YASAM07425_YAII63-12.raw	F4.8	5032.91	5135.69	6087.14	4940.15	3982.5	5585.53	6046.53	4737.3	1678.05	3811.95	5789.58	5134.46	4334.58	5089.89	5626.53	4649.08		4.21	1	FALSE	0.0001042	6.996e-05
High	Unambiguous	[K].tGAEGAVLDEAk.[N]	N-Term(TMTpro); K12(TMTpro)	3	P33176	Q12840; P33176; O60282	0	2	0.2997	0	1	1	884.999	1768.99	1768.99	-1.42	-0.00126	CID (Collision Induced Dissociation)	MS2	49.6721	28.3	33.229	65.5867	12777	201015L_YASAM07425_YAII63-12.raw	F4.8	6206.4	5909.66	7695.2	7318.94	6209.05	9495.91	9377.73	7307.38	2969.58	5497.6	8106.65	8949.48	7122.4	9241.76	8368.69	4118.63		3.17	1	FALSE	0.0001042	0.0002855
High	Unambiguous	[K].dDVSISVEEGk.[E]	N-Term(TMTpro); K11(TMTpro)	1	P07814	P07814	0	2	0.4738	0	1	1	893.49	1785.97	1785.97	-0.41	-0.00036	CID (Collision Induced Dissociation)	MS2	0	33.5	26.656	65.5301	12754	201015L_YASAM07425_YAII63-12.raw	F4.8	7761.71	6775.95	9962.33	9321.69	6256.81	12069.1	12199.5	7781.06	3025.92	5598.91	7779.76	11845.8	8516.62	11854.9	8779.32	5233.66		4.2	1	FALSE	0.0001042	3.572e-05
High	Unambiguous	[K].gDQENVHPDVMLVQPR.[V]	N-Term(TMTpro)	1	Q14974	Q14974	0	2	0.6027	0	1	1	1069.55	2138.1	2138.1	-1.1	-0.00118	CID (Collision Induced Dissociation)	MS2	0	7.5	75.979	65.4986	12741	201015L_YASAM07425_YAII63-12.raw	F4.8	1729.41	1848.18	2468.26	1774.36	2390.98	2011.68	2545.34	2111.09	1094.99	1632.89	1993.38	2217.7	1792.8	1285.95	2220.59	1055.74		5.16	1	FALSE	0.0001042	1.024e-06
High	Unambiguous	[K].eccHGDLLEcADDRADLAk.[Y]	N-Term(TMTpro); C2(Carbamidomethyl); C3(Carbamidomethyl); C10(Carbamidomethyl); K19(TMTpro)	1	P02769	P02769	1	3	0.5226	0	1	1	952.789	2856.35	2856.36	-1.21	-0.00116	CID (Collision Induced Dissociation)	MS2	23.4599	20	27.072	65.4948	12739	201015L_YASAM07425_YAII63-12.raw	F4.8	6151.28	5633.51	4630.44	4600.08	3956.24	5744.32	7221.67	5543.15	1542.71	3113.7	6755.11	5615.59	5809.19	7130.74	8409.76	2531.75		4.86	1	TRUE	0.0001042	5.496e-05
High	Unambiguous	[K].eTkPEPMEEDLPENk.[K]	N-Term(TMTpro); K3(TMTpro); K15(TMTpro)	1	P31948	P31948	0	3	0.4532	0	1	1	900.151	2698.44	2698.44	-1.66	-0.00149	CID (Collision Induced Dissociation)	MS2	26.7477	22.9	54.954	65.4905	12737	201015L_YASAM07425_YAII63-12.raw	F4.8	5324.81	3447.4	7096.38	5450.69	4989.42	9423.8	9411.33	6073.49	1895.68	3748.06	5792	8649.01	6115.76	8623.42	4161.87	3637.59		4.17	1	FALSE	0.0001042	2.16e-05
High	Unambiguous	[K].dGNGYISAAELR.[H]	N-Term(TMTpro)	1	P0DP25	P0DP25	0	2	0.5884	0	1	1	785.414	1569.82	1569.82	0.58	0.00046	CID (Collision Induced Dissociation)	MS2	26.2188	13.7	5.274	65.4537	12720	201015L_YASAM07425_YAII63-12.raw	F4.8	12377.6	14464.4	19408.3	20988	12727.6	24032.6	17578.2	9232.64	3989.01	14002	20756.2	25528	15024.4	24857.4	21987.9	11923.1		4.64	1	FALSE	0.0001042	1.619e-05
High	Unambiguous	[K].wQPGEEPAGSVVQDSR.[L]	N-Term(TMTpro)	1	Q9Y5K5	Q9Y5K5	0	2	0.4953	0	1	1	1023.51	2046.02	2046.02	-2.97	-0.00304	CID (Collision Induced Dissociation)	MS2	11.9179	19.6	49.731	65.3654	12678	201015L_YASAM07425_YAII63-12.raw	F4.8	4779.67	3644.01	5171.09	4528.99	4537.85	7027.78	5788.41	5524.05	1772.86	3101.1	6160.81	6191.66	5153.67	6729.18	3951.47	3561.75		4.24	1	FALSE	0.0001042	3.291e-06
High	Unambiguous	[K].tEDLEATSEHFk.[T]	N-Term(TMTpro); K12(TMTpro)	1	Q9BV40	Q9BV40	0	3	0.4644	0	1	1	672.358	2015.06	2015.06	1.55	0.00104	CID (Collision Induced Dissociation)	MS2	13.3958	10.7	7.151	65.8452	12889	201015L_YASAM07425_YAII63-12.raw	F4.8	10990	8083.43	12833.5	9861.2	9974.26	15014.9	18890.3	9297.47		12069.8	15393.3	15930.5	9246.48	14197.2	10076.7	9777.79		4.5	1	FALSE	0.0001042	1.662e-06
High	Unambiguous	[R].eLAGGLEDGEPQQk.[R]	N-Term(TMTpro); K14(TMTpro)	1	Q9BQ52	Q9BQ52	0	2	0.4593	0	1	1	1040.07	2079.12	2079.12	1.65	0.00172	CID (Collision Induced Dissociation)	MS2	0	8.6	119.5	65.2744	12640	201015L_YASAM07425_YAII63-12.raw	F4.8	2532.48	1983.01	2800.22	2202.62	2080.49	2813.02	3001.66	2058.4		1160.34	1876.99	2994.3	2509.57	3186.74	2539	1358.75		4.05	1	FALSE	0.0001042	4.444e-05
High	Unambiguous	[R].eEAENTLQSFR.[Q]	N-Term(TMTpro)	1	P08670	P08670	0	2	0.552	0	1	1	814.416	1627.82	1627.82	0.12	0.0001	CID (Collision Induced Dissociation)	MS2	7.16068	27.9	2.985	65.874	12900	201015L_YASAM07425_YAII63-12.raw	F4.8	53671.1	46296	61304.3	60657.8	52714.6	74276.8	72510.8	56634.4	20277.8	58501.2	51358	81664.3	49357.5	65333.2	27703.2	35389.6		4.42	1	TRUE	0.0001042	7.671e-05
High	Unambiguous	[R].eGTGTEMPMIGDR.[V]	N-Term(TMTpro)	1	Q02790	Q02790	0	2	0.4307	0	1	1	849.41	1697.81	1697.82	-1.83	-0.00155	CID (Collision Induced Dissociation)	MS2	26.921	25.6	24.303	65.9608	12940	201015L_YASAM07425_YAII63-12.raw	F4.8	6637.23	6243.53	6996.78	6770.74	6192.29	7886.62	8020.74	4525.58	2612.63	5807.67	8207.75	9145.21	7792.46	7057.39	5618.25	5167.57		3.32	1	FALSE	0.0001042	0.0001121
High	Unambiguous	[K].tDMDNQIVVSDYAQmDR.[V]	N-Term(TMTpro); M15(Oxidation)	1	P50991	P50991	0	2	0.6625	0	1	1	1161.04	2321.07	2321.07	-1.38	-0.0016	CID (Collision Induced Dissociation)	MS2	0	6	119.5	66.5094	13173	201015L_YASAM07425_YAII63-12.raw	F4.8	1508.85	944.125	1820.22	1204.47	1070.5	2357.54	1801.31	1726.59		1652.72	1432.55	1781.73	2469.29	2132.99	1915.44	629.766		4.8	1	FALSE	0.0001042	1.572e-06
High	Unambiguous	[K].sLIEEGGDWDRR.[N]	N-Term(TMTpro)	1	Q15008	Q15008	1	3	0.3067	0	1	1	579.635	1736.89	1736.89	1.14	0.00066	CID (Collision Induced Dissociation)	MS2	39.112	7.2	7.447	66.4208	13138	201015L_YASAM07425_YAII63-12.raw	F4.8	4851.44	9447.65	7468.36	10394.3	6348.87	6822.35	8595.96	5211.1	4810.25	7773.85	6750.15	7068	4635.59	7612.6	7153.54	3916.81		2.38	1	FALSE	0.0001042	0.0002488
High	Unambiguous	[K].yLQEEVNINR.[K]	N-Term(TMTpro)	1	Q9UHD8	Q9UHD8	0	2	0.3668	0	1	1	791.431	1581.85	1581.86	-0.89	-0.00071	CID (Collision Induced Dissociation)	MS2	0	18	20.419	66.4038	13132	201015L_YASAM07425_YAII63-12.raw	F4.8	4640.45	3200.76	4673.89	4857.09	4518.89	6072.49	5387.2	4192.01	1647.81	4505.01	5755.68	5493.99	4095.36	5522.48	4067.03	3628.8		3.49	1	FALSE	0.0001042	0.0003558
High	Unambiguous	[R].eSTGAQVQVAGDMLPNSTER.[A]	N-Term(TMTpro)	3	Q15366; Q15365	P57721; Q15366; Q15365	0	3	0.6903	0	1	1	798.733	2394.18	2394.19	-2.17	-0.00174	CID (Collision Induced Dissociation)	MS2	20.4463	12.3	7.03	66.4001	13130	201015L_YASAM07425_YAII63-12.raw	F4.8	9001.09	5948.56	8377.66	7132.06	6245.94	6379.06	13779.3	6708.05	2113	9625.22	7943.98	11735.3	10700.6	8414.83	7955.5	5336.75		5.36	2	FALSE	0.0001042	2.524e-06
High	Unambiguous	[K].mDATANDVPSPYEVR.[G]	N-Term(TMTpro)	1	P30101	P30101	0	2	0.7243	0	1	1	984.985	1968.96	1968.97	-1.48	-0.00146	CID (Collision Induced Dissociation)	MS2	37.0492	59.2	24.455	66.391	13126	201015L_YASAM07425_YAII63-12.raw	F4.8	17114.9	16023.3	14693.1	16282.4	12213.6	14412.6	18140.9	14276.6	7316.49	13337.6	15923.7	15606.3	14840.8	17878.7	15020.1	11270.3		3.99	1	FALSE	0.0001042	3.546e-06
High	Unambiguous	[R].vLGTSPEAIDSAENR.[F]	N-Term(TMTpro)	1	P27708	P27708	0	2	0.6134	0	1	1	931.992	1862.98	1862.98	-0.23	-0.00021	CID (Collision Induced Dissociation)	MS2	0	22.3	70.518	66.3657	13115	201015L_YASAM07425_YAII63-12.raw	F4.8	5042.81	5020.99	6819.74	6290.34	5383.18	6343.54	6701.48	5205.22	2627.05	4963.21	6156.65	8075.84	5660.81	5632.91	4665.52	5396.11		4.76	1	FALSE	0.0001042	1.864e-05
High	Unambiguous	[K].aTLELTHNWGTEDDETQSYHNGNSDPR.[G]	N-Term(TMTpro)	1	Q04760	Q04760	0	4	0.6932	0	1	1	848.641	3391.54	3391.54	1.73	0.00146	CID (Collision Induced Dissociation)	MS2	31.4332	13.1	18.472	66.3546	13111	201015L_YASAM07425_YAII63-12.raw	F4.8	5595.55	4201.72	5140.4	4957.59	3435.04	5675.9	5550.72	5014.33	1471.97	5091.81	4940.46	4482.91	6142.48	5092.98	5298.54	4122		2.51	1	FALSE	0.0001042	1.581e-05
High	Unambiguous	[K].tVAVWDSETGER.[V]	N-Term(TMTpro)	1	Q96DI7	Q96DI7	0	2	0.5666	0	1	1	827.423	1653.84	1653.84	-0.49	-0.0004	CID (Collision Induced Dissociation)	MS2	8.30892	29.5	15.747	66.2831	13080	201015L_YASAM07425_YAII63-12.raw	F4.8	7185.3	6917.28	7969.54	6432.14	6307.61	9314.31	8433.14	8161.82	2601.07	7456.27	6631.08	10005	8385.51	7267.71	8973.33	5655.14		4.13	1	FALSE	0.0001042	4.679e-05
High	Unambiguous	[K].dISTTLNADEAVAR.[G]	N-Term(TMTpro)	2	O95757; Q92598	O95757; Q92598	0	2	0.5519	0	1	1	890.474	1779.94	1779.94	0.25	0.00022	CID (Collision Induced Dissociation)	MS2	0	21.7	71.064	66.2632	13072	201015L_YASAM07425_YAII63-12.raw	F4.8	4407.73	4898.38	5946.75	5761.79	4046.24	6650.46	5268.59	4568.93	2492.88	4586.52	6025.71	7791.81	5193.3	7370.07	6069.6	4302.62		3.37	2	FALSE	0.0001042	3.52e-05
High	Unambiguous	[R].eSTGAQVQVAGDMLPNSTER.[A]	N-Term(TMTpro)	3	Q15366; Q15365	P57721; Q15366; Q15365	0	2	0.714	0	1	1	1197.6	2394.19	2394.19	0.41	0.00049	CID (Collision Induced Dissociation)	MS2	0	5.3	119.5	66.2037	13049	201015L_YASAM07425_YAII63-12.raw	F4.8	1298.55	595.667	1304.6	1339.28	1066.17	1212.46	1847.53	1181.89	918.067	1486.76	841.08	1833.97	1666.04	1852.02	1516.08	966.656		6.05	2	FALSE	0.0001042	1.028e-08
High	Unambiguous	[R].yAPSEAGLHEMDIR.[Y]	N-Term(TMTpro)	1	P21333	P21333	0	3	0.4644	0	1	1	631.655	1892.95	1892.95	0.71	0.00045	CID (Collision Induced Dissociation)	MS2	19.4903	11.5	6.115	66.0669	12988	201015L_YASAM07425_YAII63-12.raw	F4.8	4675.53	6897.24	5699.14	7726.07	5049	6650.66	5885.12	6400.23	3955.94	5584.82	7233.22	6942.34	8437.25	6101.35	8403.85	4513.31		3.23	1	FALSE	0.0001042	4.7e-06
High	Unambiguous	[K].hTGccGDNDPIDVcEIGSk.[V]	N-Term(TMTpro); C4(Carbamidomethyl); C5(Carbamidomethyl); C14(Carbamidomethyl); K19(TMTpro)	1	Q15181	Q15181	0	3	0.7772	0	1	1	914.763	2742.28	2742.28	-0.85	-0.00078	CID (Collision Induced Dissociation)	MS2	23.3464	33.5	31.971	66.0563	12983	201015L_YASAM07425_YAII63-12.raw	F4.8	8417.96	7186.66	8955.89	8151.49	5500.97	11357.5	11928	6167.3	3534.42	5630.46	10606.8	11203.6	8819.4	9919.8	8472.79	5023.31		6.24	1	FALSE	0.0001042	2.172e-06
High	Unambiguous	[K].gPPDFSSDEEREPTPVLGSGAAAAGR.[S]	N-Term(TMTpro)	2	P42167; P42166	P42167; P42166	1	3	0.631	0	1	1	958.811	2874.42	2874.42	-0.12	-0.00011	CID (Collision Induced Dissociation)	MS2	2.92189	28	12.914	66.0275	12969	201015L_YASAM07425_YAII63-12.raw	F4.8	7562.78	6806.43	7495.44	8443.28	8028.95	8767.36	8567.73	7214.69	4385.19	7799.79	8478.03	7213.71	7086.69	8481.46	8528.38	6996.68		4.96	2	FALSE	0.0001042	7.704e-05
High	Unambiguous	[K].lNQVcFDDDGTSSPQDR.[L]	N-Term(TMTpro); C5(Carbamidomethyl)	1	Q8N1F7	Q8N1F7	0	2	0.6982	0	1	1	1129.52	2258.03	2258.03	-0.29	-0.00032	CID (Collision Induced Dissociation)	MS2	34.2993	8.3	72.8	66.0147	12964	201015L_YASAM07425_YAII63-12.raw	F4.8	2461.51	2098.17	1964.35	2509.91	2161.87	2059.94	1399.09	2134.76	589.177	2537.29	3237.64	2497.43	2084.32	1750.36	2071	2043.38		4.34	1	FALSE	0.0001042	4.921e-08
High	Unambiguous	[K].eVDEGAWETk.[I]	N-Term(TMTpro); K10(TMTpro)	1	Q86UE4	Q86UE4	0	2	0.3975	0	1	1	886.471	1771.93	1771.94	-0.87	-0.00077	CID (Collision Induced Dissociation)	MS2	37.7636	39.5	21.158	65.9996	12956	201015L_YASAM07425_YAII63-12.raw	F4.8	9880.58	7573.1	16411.5	12168.2	8586.49	16656	17601.1	10422.4	3662.01	7047.07	13296.6	16632.9	11201.7	14638.1	7820.08	8995.99		3.95	1	FALSE	0.0001042	0.0002939
High	Unambiguous	[K].mDSTANEVEAVk.[V]	N-Term(TMTpro); K12(TMTpro)	1	P07237	P07237	0	2	0.553	0	1	1	951.51	1902.01	1902.01	-0.73	-0.00069	CID (Collision Induced Dissociation)	MS2	5.27622	39.3	39.445	65.8761	12902	201015L_YASAM07425_YAII63-12.raw	F4.8	8980.46	7468.34	10685.2	10167.4	7341.33	14278.3	12167.1	8364.57	2596.82	7185.71	10454.7	14416.7	9391.3	14539	10892.8	7811.08		4.43	1	FALSE	0.0001042	4.058e-05
High	Unambiguous	[K].gVGDGTVSWGLEDDEDmTLTR.[W]	N-Term(TMTpro); M17(Oxidation)	2	Q13404; Q15819	Q13404; Q15819	0	3	0.7623	0	1	1	858.404	2573.2	2573.2	-0.29	-0.00025	CID (Collision Induced Dissociation)	MS2	0	7.4	75.05	73.1036	15110	201015L_YASAM07425_YAII63-12.raw	F4.8	1897.7	1510.11	2863.44	1927.74	1402.94	1895.64	2340.89	2177.54	952.753	1471.81	1617.72	2376.18	2290.11	2244.51	1870	807.839		6.1	2	FALSE	0.0001042	8.093e-10
High	Unambiguous	[K].dTVATQLSEAVDATR.[G]	N-Term(TMTpro)	1	O60664	O60664	0	2	0.5243	0	1	1	940.999	1880.99	1880.99	1.3	0.00122	CID (Collision Induced Dissociation)	MS2	4.07923	29.5	78.856	73.1339	15118	201015L_YASAM07425_YAII63-12.raw	F4.8	7035.87	6819.56	8100.13	8177.13	6022.18	8284.44	8963.77	6219.73	2952.3	7085.81	8019.15	8241.96	8217.72	8606.63	7907	5936.88		4.12	1	FALSE	0.0001042	6.585e-06
High	Unambiguous	[R].wMDEAQALDTADR.[F]	N-Term(TMTpro)	1	Q9BXJ9	Q9BXJ9	0	2	0.5471	0	1	1	913.439	1825.87	1825.87	0.29	0.00026	CID (Collision Induced Dissociation)	MS2	0	20	61.944	73.1554	15123	201015L_YASAM07425_YAII63-12.raw	F4.8	5092.05	5303.36	4634.31	5119.44	4361.8	4991.71	7335.24	5406.74	2908.94	4569.52	5382.6	6606.89	5232.35	7174.63	2947.34	3749.8		3.93	1	FALSE	0.0001042	6.284e-05
High	Unambiguous	[R].yAAPEQNNDPQQSk.[V]	N-Term(TMTpro); K14(TMTpro)	1	Q8NI36	Q8NI36	0	2	0.5532	0	1	1	1099.57	2198.13	2198.13	-1.44	-0.00158	CID (Collision Induced Dissociation)	MS2	0	5	73.07	55.0109	9365	201015L_YASAM07425_YAII63-13.raw	F4.9	1185.06	2461.7	1281.19	1419.96	1811.6	2121.91	3079.75	1043.57		527.939	1134.97	821.114	838.98	838.239	1138.22			4.23	1	FALSE	0.0001042	1.269e-05
High	Unambiguous	[K].sNVSDAVAQSTR.[I]	N-Term(TMTpro)	1	P60174	P60174	0	2	0.5859	0	1	1	769.908	1538.81	1538.81	-1.02	-0.00079	CID (Collision Induced Dissociation)	MS2	0	17.7	1.481	54.9249	9335	201015L_YASAM07425_YAII63-13.raw	F4.9	76729.9	56942.2	78435.4	90865.6	45977.8	83163.2	110426	86611	35036	89099.7	91738.5	115864	98152.1	108094	83662	78962.6		4.25	1	FALSE	0.0001042	9.652e-05
High	Unambiguous	[K].eQYQQQQQWGSR.[G]	N-Term(TMTpro)	1	Q14103	Q14103	0	2	0.4681	0	1	1	935.46	1869.91	1869.92	-2.34	-0.00219	CID (Collision Induced Dissociation)	MS2	0	33.6	43.909	54.7384	9271	201015L_YASAM07425_YAII63-13.raw	F4.9	8396.57	6630.65	9944.93	10412.9	7461.53	10423.1	9902.54	8665.87	2775.63	5795.26	9668.1	10729.3	9476.05	10033.4	8480.46	6414.39		4.23	1	FALSE	0.0001042	8.502e-05
High	Unambiguous	[K].mDETDASSAVk.[V]	N-Term(TMTpro); M1(Oxidation); K11(TMTpro)	1	Q13148	Q13148	0	2	0.5323	0	1	1	889.46	1777.91	1777.91	-0.53	-0.00047	CID (Collision Induced Dissociation)	MS2	0	37.2	20.602	54.7076	9262	201015L_YASAM07425_YAII63-13.raw	F4.9	8572.03	7822.31	8831.16	9930.26	7583.93	13071	14722.8	8295.96	3993.74	8181.49	11895.1	10516.6	9517.35	12183.9	10201.9	5534.14		2.63	1	FALSE	0.0001042	6.576e-05
High	Unambiguous	[K].tGGADQSLQQGEGSk.[K]	N-Term(TMTpro); K15(TMTpro)	1	P09132	P09132	0	2	0.538	0	1	1	1036.05	2071.09	2071.09	-0.01	-1e-05	CID (Collision Induced Dissociation)	MS2	0	12.7	73.58	54.5576	9220	201015L_YASAM07425_YAII63-13.raw	F4.9	2532.06	2845.63	3583.38	2927.06	3045.81	2664.15	3393.51	3177.33	1269.73	2386.13	3715.59	3609.63	3146.08	4552.97	3356.46	2527.27		5.13	1	FALSE	0.0001042	4.282e-06
High	Unambiguous	[K].qGGGGGGGSVPGIER.[M]	N-Term(TMTpro)	1	P52272	P52272	0	2	0.5186	0	1	1	794.922	1588.84	1588.84	-0.01	-1e-05	CID (Collision Induced Dissociation)	MS2	0	26.9	9.397	54.4027	9165	201015L_YASAM07425_YAII63-13.raw	F4.9	8415.53	10839.9	11219.9	8468.48	7982.1	10984.9	10167.3	9844.22	3695.12	8323.52	13392.8	12227.2	13415.9	12400.2	12572.1	7924.37		3.76	1	FALSE	0.0001042	0.0001197
High	Unambiguous	[R].sSPSGPSNPSNPSVEEk.[L]	N-Term(TMTpro); K17(TMTpro)	1	Q8WY22	Q8WY22	0	2	0.462	0	1	1	1154.6	2308.2	2308.19	2.74	0.00316	CID (Collision Induced Dissociation)	MS2	0	4.4	119.5	55.1351	9412	201015L_YASAM07425_YAII63-13.raw	F4.9	1023.61		1018.79		941.204	1188.48	865.743		800.276	1159.75	2671.17	2540.55	1899.24	1555.86	1056.03	1080.86		3.29	1	FALSE	0.0001042	5.199e-05
High	Unambiguous	[K].sTESLQANVQR.[L]	N-Term(TMTpro)	1	P26373	P26373	0	2	0.5559	0	1	1	768.919	1536.83	1536.83	0.73	0.00056	CID (Collision Induced Dissociation)	MS2	0	47	9.07	54.3201	9129	201015L_YASAM07425_YAII63-13.raw	F4.9	12224.4	11033.5	15606.8	11461.6	10418.6	13324.3	11502.1	13106.7	5472.78	9528.61	14110.9	13682.6	11902.8	13767.7	12918.4	10056.9		3.4	1	FALSE	0.0001042	0.0001358
High	Unambiguous	[K].aGYSQGATQYTQAQQTR.[Q]	N-Term(TMTpro)	1	Q96KR1	Q96KR1	0	2	0.5749	0	1	1	1082.04	2163.07	2163.07	-0.1	-0.00011	CID (Collision Induced Dissociation)	MS2	0	4.8	81.997	54.2043	9078	201015L_YASAM07425_YAII63-13.raw	F4.9	1071.96	833.936	1109.53	1212.34	886.376	1060.99	991.894	650.959		3125.09	2758.11	1798.87	1075.24	1170.35	1066.53	861.013		5.34	1	FALSE	0.0001042	1.403e-07
High	Unambiguous	[K].aTEPAADTGAQPk.[G]	N-Term(TMTpro); K13(TMTpro)	1	Q9UPT8	Q9UPT8	0	2	0.4297	0	1	1	933.014	1865.02	1865.03	-2.6	-0.00242	CID (Collision Induced Dissociation)	MS2	0	23.2	74.45	54.0521	9014	201015L_YASAM07425_YAII63-13.raw	F4.9	4868.41	5645.84	5710.18	5341.35	5406.99	5538.55	8258.5	4442.67	2716.59	4516.7	6958.98	7561	5553.54	7476.81	6016.03	4518.57		3.84	1	FALSE	0.0001042	8.447e-06
High	Unambiguous	[R].sSGSPYGGGYGSGGGSGGYGSR.[R]	N-Term(TMTpro)	1	P51991	P51991	0	2	0.7928	0	1	1	1108	2215	2215	-0.22	-0.00024	CID (Collision Induced Dissociation)	MS2	0	3.9	119.5	54.0229	9002	201015L_YASAM07425_YAII63-13.raw	F4.9	1261.22	833.071	2165.67	595.705	928.697	1568.28	881.496			1095.99	1202.82	1254.62	900.867	1364.21	1066.41	665.174		6.95	1	FALSE	0.0001042	4.373e-10
High	Unambiguous	[K].hTGPNSPDTANDGFVR.[L]	N-Term(TMTpro)	2	P31943; P55795	P31943; P55795	0	2	0.5942	0	1	1	994.99	1988.97	1988.97	-1.35	-0.00134	CID (Collision Induced Dissociation)	MS2	0	20.5	39.582	53.9079	8951	201015L_YASAM07425_YAII63-13.raw	F4.9	5087.88	3183.56	4715.47	5423.58	5102.86	5052.4	5449.13	4327.21	3031.84	5137.06	7593.74	6991.88	6555.67	6117.98	6372.38	3863.76		4.46	2	FALSE	0.0001042	0.0001179
High	Unambiguous	[K].sPQSDPADTPTNTk.[Q]	N-Term(TMTpro); K14(TMTpro)	1	P46013	P46013	0	2	0.4815	0	1	1	1034.04	2067.08	2067.08	-2.11	-0.00218	CID (Collision Induced Dissociation)	MS2	0	11.5	73.61	53.8774	8941	201015L_YASAM07425_YAII63-13.raw	F4.9	2643.79	2578.11	2858.55	3010.12	2728.66	4193.64	3698.09	2173.43	790.473	2236.05	3269.08	3754.72	2794.33	3070.93	2761.21	1143.47		4.59	1	FALSE	0.0001042	0.0002965
High	Unambiguous	[K].aAATPESQEPQAk.[G]	N-Term(TMTpro); K13(TMTpro)	1	P49006	P49006	0	2	0.5772	0	1	1	968.536	1936.06	1936.06	0.52	0.0005	CID (Collision Induced Dissociation)	MS2	0	19.1	119.5	53.7085	8869	201015L_YASAM07425_YAII63-13.raw	F4.9	4176.16	3663.59	4305.91	5098.87	3899.53	6905.54	5353.99	4959.07	1225.98	4104.98	6370.16	8402.62	4360.35	6120.01	5487.95	3670.4		4.73	1	FALSE	0.0001042	5.73e-06
High	Unambiguous	[K].tTDTASVQNEAk.[L]	N-Term(TMTpro); K12(TMTpro)	1	Q9ULV4	Q9ULV4	0	2	0.5653	0	1	1	937.011	1873.01	1873.02	-0.61	-0.00057	CID (Collision Induced Dissociation)	MS2	0	26.7	119.5	54.2486	9096	201015L_YASAM07425_YAII63-13.raw	F4.9	5539.02	5486.31	7808.02	5985.62	5446.35	9814.04	10515.3	5583.53	2583.94	4499.94	6955.29	7983.77	5894.97	9603.01	8506.64	4791.18		4.21	1	FALSE	0.0001042	3.408e-05
High	Unambiguous	[R].gGSGGSHGGGSGFGGESGGSYGGGEEASGSGGGYGGGSGk.[S]	N-Term(TMTpro); K40(TMTpro)	3	P35527	547748; 1082558; P35527	0	3	0.8736	0	1	1	1277.9	3831.69	3831.7	-0.31	-0.0004	CID (Collision Induced Dissociation)	MS2	0	2	119.5	55.1828	9429	201015L_YASAM07425_YAII63-13.raw	F4.9			1436.15	1094.09	581.622		608.087			646.576	1123.75	1008.74		1004.41	635.949			11.31	1	TRUE	0.0001042	3.745e-13
High	Unambiguous	[R].gGSGGSHGGGSGFGGESGGSYGGGEEASGSGGGYGGGSGk.[S]	N-Term(TMTpro); K40(TMTpro)	3	P35527	547748; 1082558; P35527	0	4	0.8322	0	1	1	958.678	3831.69	3831.7	-1.38	-0.00132	CID (Collision Induced Dissociation)	MS2	0	19.6	30.766	55.3075	9479	201015L_YASAM07425_YAII63-13.raw	F4.9	3030.3	4226.61	5739.02	7834.59	4855.15	3533.89	3046.27	3420.86	1324.79	4126.19	7862.39	9988.68	3213.75	7564.1	4712.09	2483.47		7.57	1	TRUE	0.0001042	8.389e-06
High	Unambiguous	[K].eESAASGGAAYTk.[R]	N-Term(TMTpro); K13(TMTpro)	1	Q9Y2W1	Q9Y2W1	0	2	0.5607	0	1	1	925.492	1849.98	1849.98	-1.08	-0.001	CID (Collision Induced Dissociation)	MS2	0	32.8	119.5	55.3613	9503	201015L_YASAM07425_YAII63-13.raw	F4.9	6219.13	7362.79	7721.73	9084.11	6334.54	13709.6	11879.6	7348.89	2231.27	6968.34	10337.2	10157.4	8710.69	10770.3	8484.21	4904.31		4.94	1	FALSE	0.0001042	3.973e-07
High	Unambiguous	[R].gPAGDATVASEk.[E]	N-Term(TMTpro); K12(TMTpro)	1	Q15758	Q15758	0	2	0.4692	0	1	1	855.978	1710.95	1710.95	-1.76	-0.0015	CID (Collision Induced Dissociation)	MS2	32.1833	35.3	23.923	56.5467	9989	201015L_YASAM07425_YAII63-13.raw	F4.9	8275.22	6790.97	8806.55	8327.23	6436.65	11435.4	11629.5	9539	2668.87	8270.18	9613.93	12583.4	8895.86	12203.1	6625.65	5022.1		3.73	1	FALSE	0.0001042	0.0003382
High	Unambiguous	[K].tDNAGDQHGGGGGGGGGAGAAGGGGGGENYDDPHkTPASPVVHIR.[G]	N-Term(TMTpro); K35(TMTpro)	1	P14866	P14866	1	4	0.6758	0	1	1	1162.56	4647.21	4647.22	-1.31	-0.00152	CID (Collision Induced Dissociation)	MS2	0	1.1	119.5	56.4357	9942	201015L_YASAM07425_YAII63-13.raw	F4.9				816.931			790.936			581.246	525.705	577.897	574.34		678.366			5.46	1	FALSE	0.0001042	0.000197
High	Unambiguous	[K].eESGVSVSNSQPTNESHSIk.[A]	N-Term(TMTpro); K20(TMTpro)	1	Q99808	Q99808	0	3	0.6267	0	1	1	908.801	2724.39	2724.39	-1.24	-0.00113	CID (Collision Induced Dissociation)	MS2	0	33.3	12.881	56.3607	9908	201015L_YASAM07425_YAII63-13.raw	F4.9	5889.09	8820.6	9173.61	9314.22	5877.62	10132.5	9592.71	7192.24	2766.28	7014.13	10525.1	10414.7	9266.39	11650.6	10833.9	6886.72		6.43	1	FALSE	0.0001042	1.686e-07
High	Unambiguous	[K].hEQNIDcGGGYVk.[L]	N-Term(TMTpro); C7(Carbamidomethyl); K13(TMTpro)	1	P27797	P27797	0	3	0.5056	0	1	1	695.694	2085.07	2085.07	-0.17	-0.00012	CID (Collision Induced Dissociation)	MS2	0	19.4	5.314	56.1205	9812	201015L_YASAM07425_YAII63-13.raw	F4.9	18959.1	14765.8	22454.1	22390.6	13113.1	28023.4	22519.4	17144.9	4102.44	12581.2	27923.6	25392.4	21011.8	26244.7	21719.8	15850.5		4.45	1	FALSE	0.0001042	1.107e-06
High	Unambiguous	[K].hEQNIDcGGGYVk.[L]	N-Term(TMTpro); C7(Carbamidomethyl); K13(TMTpro)	1	P27797	P27797	0	2	0.4989	0	1	1	1043.04	2085.06	2085.07	-1.39	-0.00145	CID (Collision Induced Dissociation)	MS2	26.8117	9.4	73.52	56.1039	9806	201015L_YASAM07425_YAII63-13.raw	F4.9	2091.13	2281.78	2994.68	1378.69	2112.84	3977.07	4710.79	2043.05	769.767	1467.14	2132.16	3323.42	2404.63	2743.36	1502.14	1143.23		4.51	1	FALSE	0.0001042	0.0001057
High	Unambiguous	[K].gLAAEDSGGDSk.[D]	N-Term(TMTpro); K12(TMTpro)	1	P41227	P41227	0	2	0.4263	0	1	1	857.958	1714.91	1714.91	-1.42	-0.00121	CID (Collision Induced Dissociation)	MS2	32.6222	30	24.104	56.0969	9803	201015L_YASAM07425_YAII63-13.raw	F4.9	6500.32	6403.36	7963.95	9506.41	6049.43	10280.4	10449.1	7217.69	3213.39	7131.51	8807.05	11160.5	6901.59	8151.81	8165.16	5363.62		3.12	1	FALSE	0.0001042	0.0002544
High	Unambiguous	[K].sSAEVIAQAR.[K]	N-Term(TMTpro)	1	Q16555	Q16555	0	2	0.3473	0	1	1	668.38	1335.75	1335.76	-1.16	-0.00078	CID (Collision Induced Dissociation)	MS2	0	14.8	8.319	55.9526	9751	201015L_YASAM07425_YAII63-13.raw	F4.9	12187.3	13652.7	20904.2	18497.7	16382.3	20882.6	21726.5	14906	7022.84	16399.1	14229.8	16128.1	18199	24402.8	10760.6	13198		2.62	1	FALSE	0.0001042	0.0003648
High	Unambiguous	[K].sHEAEVLk.[Q]	N-Term(TMTpro); K8(TMTpro)	1	P16949	P16949	0	3	0.3801	0	1	1	507.635	1520.89	1520.89	-1.72	-0.00087	CID (Collision Induced Dissociation)	MS2	43.9983	64.6	3.961	55.7703	9681	201015L_YASAM07425_YAII63-13.raw	F4.9	44800.5	45580.9	52924.6	51595.5	41771	60815.3	67508.8	46734.9	15999.7	45113.5	54530.7	64108	64975.2	61145.7	56737.8	41288		3.42	1	FALSE	0.0001042	7.729e-05
High	Unambiguous	[K].dGDGTITTk.[E]	N-Term(TMTpro); K9(TMTpro)	1	P0DP25	P0DP25	0	2	0.5719	0	1	1	758.429	1515.85	1515.85	-0.25	-0.00019	CID (Collision Induced Dissociation)	MS2	3.86172	29.2	1.645	55.73	9662	201015L_YASAM07425_YAII63-13.raw	F4.9	112480	74937	150291	98523.9	109942	185546	189475	146934	29192.6	71272.1	152249	204360	111435	152443	113063	104210		3.27	1	FALSE	0.0001042	0.0003822
High	Unambiguous	[R].gGSGGSHGGGSGFGGESGGSYGGGEEASGSGGGYGGGSGk.[S]	N-Term(TMTpro); K40(TMTpro)	3	P35527	547748; 1082558; P35527	0	4	0.874	0	1	1	958.678	3831.69	3831.7	-1.76	-0.00169	CID (Collision Induced Dissociation)	MS2	56.8797	14.2	31.024	55.7076	9652	201015L_YASAM07425_YAII63-13.raw	F4.9	2929.03	2367.99	4967.15	6898.55	3015.82	2692.11	2507.77	3611.75		3486.31	6728.54	6317.74	2729.05	4562.21	2951.47	2403.54		7.3	1	TRUE	0.0001042	1.408e-05
High	Unambiguous	[K].nAESNAELk.[G]	N-Term(TMTpro); K9(TMTpro)	1	P18621	P18621	0	2	0.4442	0	1	1	792.448	1583.89	1583.89	0.48	0.00038	CID (Collision Induced Dissociation)	MS2	35.0101	32.7	5.983	55.6217	9614	201015L_YASAM07425_YAII63-13.raw	F4.9	36800.7	25614.8	47620.8	38574.1	25553.8	50157.6	44420.5	38742.4	17210	33241.5	49503.1	59785.6	52242.9	58247.4	40801.2	26922.9		3.85	1	FALSE	0.0001042	0.0003922
High	Unambiguous	[K].aEPSEVDmNSPk.[S]	N-Term(TMTpro); M8(Oxidation); K12(TMTpro)	1	Q9NR30	Q9NR30	0	2	0.5017	0	1	1	964.498	1927.99	1927.99	-1.74	-0.00168	CID (Collision Induced Dissociation)	MS2	28.9504	31.8	38.057	55.5146	9567	201015L_YASAM07425_YAII63-13.raw	F4.9	7037.81	6585.27	8587.38	9373.95	6042.83	9109.08	8915.69	8132.17	3702.41	7174.58	9395.68	9848.01	8096.73	10855.3	9052.61	5652.09		3.01	1	FALSE	0.0001042	0.0003209
High	Unambiguous	[K].sVAQQASLTEQR.[L]	N-Term(TMTpro)	1	P52306	P52306	0	2	0.5718	0	1	1	811.444	1621.88	1621.88	-1.36	-0.0011	CID (Collision Induced Dissociation)	MS2	0	18.8	15.565	55.507	9563	201015L_YASAM07425_YAII63-13.raw	F4.9	7987.26	8099.76	8876.82	8186.36	6534.63	10592.2	9137.47	9726.67	5325.43	7233.98	8521.67	11286.4	10057.5	9897.68	10204.6	7670.61		3.83	1	FALSE	0.0001042	4.852e-05
High	Unambiguous	[R].yFDGSGGNNHAVEHYR.[E]	N-Term(TMTpro)	1	P45974	P45974	0	2	0.5926	0	1	1	1064	2126.99	2127	-2.5	-0.00266	CID (Collision Induced Dissociation)	MS2	0	3.3	119.5	55.4884	9556	201015L_YASAM07425_YAII63-13.raw	F4.9		1111.33	1352.56	997.679	1078.15	1351.92	943.124	718.972		1295.44	1023.5	932.06	611.662	996.526	988.984			3.78	1	FALSE	0.0001042	6.239e-05
High	Unambiguous	[R].nmGGPYGGGNYGPGGSGGSGGYGGR.[S]	N-Term(TMTpro); M2(Oxidation)	1	P22626	P22626	0	2	0.8489	0	1	1	1255.56	2510.1	2510.11	-1.34	-0.00168	CID (Collision Induced Dissociation)	MS2	0	3.1	92.318	55.4212	9525	201015L_YASAM07425_YAII63-13.raw	F4.9	484.523	510.519	921.57	796.048	1048.98	1162.2	976.085	671.077		478.098	1404.09		712.59	1631.49	848.595	1021.33		6.75	1	FALSE	0.0001042	2.175e-08
High	Unambiguous	[K].aDGYNQPDSk.[R]	N-Term(TMTpro); K10(TMTpro)	2	O43390; O60506	O43390; O60506	0	2	0.5621	0	1	1	851.947	1702.89	1702.89	-0.99	-0.00084	CID (Collision Induced Dissociation)	MS2	0	55.2	8.418	53.6573	8851	201015L_YASAM07425_YAII63-13.raw	F4.9	10412.9	10262.5	14117.1	15636.8	10821.6	18788.8	20911.6	13036.1	5045.82	10392.8	16264.6	20404.8	15987.6	19166.4	16288.4	9993		3.54	2	FALSE	0.0001042	0.0001711
High	Unambiguous	[R].aFHNEAQVNPER.[K]	N-Term(TMTpro)	1	P17987	P17987	0	2	0.5799	0	1	1	858.443	1715.88	1715.88	-0.06	-5e-05	CID (Collision Induced Dissociation)	MS2	15.0032	34.2	12.33	53.5433	8806	201015L_YASAM07425_YAII63-13.raw	F4.9	11304.8	9572.2	13861	13416.3	11632.3	12040.9	15516.3	12179.5	4794.02	11433.1	13092.1	16990	14797	16001.1	8972.26	9612.71		4.57	1	FALSE	0.0001042	1.287e-06
High	Unambiguous	[K].ncSETQYESk.[V]	N-Term(TMTpro); C2(Carbamidomethyl); K10(TMTpro)	1	P61981	P61981	0	2	0.5172	0	1	1	927.462	1853.92	1853.92	-1.52	-0.00141	CID (Collision Induced Dissociation)	MS2	0	23.8	58.608	53.4495	8764	201015L_YASAM07425_YAII63-13.raw	F4.9	5340.71	5750.91	6015.61	6482.37	5633.42	7496.84	7681.23	5972.39	1802.66	4592.8	7669.26	7307.03	5580.31	7654.3	5970.01	4279.64		3.77	1	FALSE	0.0001042	0.0001827
High	Unambiguous	[K].tVAQSQQLETNSQR.[D]	N-Term(TMTpro)	1	P40938	P40938	0	2	0.5815	0	1	1	947.5	1893.99	1893.99	-0.78	-0.00074	CID (Collision Induced Dissociation)	MS2	0	16.9	88.802	53.1629	8632	201015L_YASAM07425_YAII63-13.raw	F4.9	3496.2	4088.73	4767.98	5418.6	4141.02	4161.94	4012.97	3312.14	2564.71	3976.45	4978.6	3749.3	5492.73	5212.62	4836.41	3285.9		5.09	1	FALSE	0.0001042	1.007e-06
High	Unambiguous	[R].tQHIGNQEENk.[S]	N-Term(TMTpro); K11(TMTpro)	1	P08575	P08575	0	3	0.4371	0	1	1	636.015	1906.03	1906.03	2.29	0.00145	CID (Collision Induced Dissociation)	MS2	27.9223	11.1	9.026	51.2081	7744	201015L_YASAM07425_YAII63-13.raw	F4.9	12700.1	9163.83	11253.7	14539	8601.69	16676.2	15524.1	11098.1	3611.08	7325.23	13129.4	15073.3	14702.3	20839.9	16214.8	8858.96		4.37	1	FALSE	0.0001042	4.424e-05
High	Unambiguous	[K].aTGDETGAk.[V]	N-Term(TMTpro); K9(TMTpro)	1	P61247	P61247	0	2	0.4611	0	1	1	729.408	1457.81	1457.81	0.16	0.00012	CID (Collision Induced Dissociation)	MS2	33.6722	24.8	11.154	50.91	7606	201015L_YASAM07425_YAII63-13.raw	F4.9	19804.8	14281.6	25430.4	18235.4	17335.5	28132.1	25587	20354.9	7163.04	16015.1	20423.9	26814.3	21669.2	30666.3	26282.5	13998.2		3.34	1	FALSE	0.0001042	0.0002172
High	Unambiguous	[K].yTQVGPDHNR.[S]	N-Term(TMTpro)	1	Q08211	Q08211	0	3	0.5674	0	1	1	497.594	1490.77	1490.77	-0.03	-1e-05	CID (Collision Induced Dissociation)	MS2	8.10026	45.1	8.546	50.4806	7423	201015L_YASAM07425_YAII63-13.raw	F4.9	18443.5	15673.7	24203.9	23013	19274.4	27504	27180.6	17209.7	10613.4	18807.6	23852.7	25261.1	21830.3	26154.2	18989.1	15384.9		4.23	1	FALSE	0.0001042	0.0003742
High	Unambiguous	[K].yHTINGHNAEVR.[K]	N-Term(TMTpro)	1	P22626	P22626	0	2	0.6145	0	1	1	857.95	1714.89	1714.89	-0.91	-0.00078	CID (Collision Induced Dissociation)	MS2	0	21.6	90.619	50.1237	7268	201015L_YASAM07425_YAII63-13.raw	F4.9	5591.88	5554.67	4824.33	6465.47	5030.38	6178.53	6151.07	5261.58	2597.33	5534.14	7256.96	4559.23	5089.27	6200.17	5237.47	4389.55		3.45	1	FALSE	0.0001042	6.219e-05
High	Unambiguous	[R].sQSSDTEQQSPTSGGGk.[V]	N-Term(TMTpro); K17(TMTpro)	1	P23588	P23588	0	3	0.5962	0	1	1	763.72	2289.15	2289.15	0.63	0.00048	CID (Collision Induced Dissociation)	MS2	0	22.1	21.764	50.1184	7265	201015L_YASAM07425_YAII63-13.raw	F4.9	7241.47	5423.9	8317.73	7761.52	6020.56	11176.7	9428.8	6706.46	1798.14	6517.06	8689.71	10759.2	8436.5	9663.83	7739.85	5694.87		5.82	1	FALSE	0.0001042	2.269e-08
High	Unambiguous	[R].gGSGGGGSISGGGYGSGGGSGGR.[Y]	N-Term(TMTpro)	3	254622	P35908; 254622; 547754	0	2	0.4953	0	1	1	1023.48	2045.95	2045.96	-0.7	-0.00072	CID (Collision Induced Dissociation)	MS2	31.9608	4.2	73.7	50.0502	7238	201015L_YASAM07425_YAII63-13.raw	F4.9	548.845	660.437	1111.29	1467.81	1440.04	736.661	709.746	498.757		854.681	2080.27	1375.68	1260.52	1887.72	863.216	1130.74		5.37	1	TRUE	0.0001042	6.406e-07
High	Unambiguous	[R].sQSSDTEQQSPTSGGGk.[V]	N-Term(TMTpro); K17(TMTpro)	1	P23588	P23588	0	2	0.7164	0	1	1	1145.08	2289.15	2289.15	1.94	0.00222	CID (Collision Induced Dissociation)	MS2	0		72.68	50.0128	7224	201015L_YASAM07425_YAII63-13.raw	F4.9																		6.91	1	FALSE	0.0001042	1.357e-08
High	Unambiguous	[K].hSAGSGAEESNSSSTVQk.[Q]	N-Term(TMTpro); K18(TMTpro)	1	Q8IYL3	Q8IYL3	0	3	0.4953	0	1	1	791.07	2371.2	2371.2	-1.04	-0.00082	CID (Collision Induced Dissociation)	MS2	0	20	36.828	49.7724	7120	201015L_YASAM07425_YAII63-13.raw	F4.9	5259.96	3893.48	5417.65	5892.9	3809.02	5106.68	5760.92	4617.58	2668.79	4886.37	5742.23	5946.57	4847.55	5363.35	5639.44	3785.53		4.26	1	FALSE	0.0001042	6.325e-07
High	Unambiguous	[R].sQSAAVTPSSTTSSTR.[A]	N-Term(TMTpro)	1	Q16186	Q16186	0	2	0.6236	0	1	1	936.483	1871.96	1871.96	-1.84	-0.00172	CID (Collision Induced Dissociation)	MS2	0	7.2	74.39	49.6771	7079	201015L_YASAM07425_YAII63-13.raw	F4.9	1268.82	2022.93	1157.97	2012.73	1239.35	2586.52	1286.23	2051.45	577.361	1614.28	2279.07	3064.71	1645.53	2133.54	1741.98	1193.8		4.33	1	FALSE	0.0001042	1.46e-05
High	Unambiguous	[R].eESTSSGNVSNRk.[D]	N-Term(TMTpro); K13(TMTpro)	1	P23193	P23193	1	3	0.4519	0	1	1	668.36	2003.06	2003.06	-0.03	-2e-05	CID (Collision Induced Dissociation)	MS2	15.7529	42.1	14.19	49.1266	6860	201015L_YASAM07425_YAII63-13.raw	F4.9	9970.92	13266.8	8170.28	15513.1	10391.8	14757.8	21277.7	11025.3	4313.07	10602.1	15619.4	11906.3	17151.5	19751	21943.5	9849.86		4.89	1	FALSE	0.0001042	1.363e-05
High	Unambiguous	[K].aQQNNVEHk.[V]	N-Term(TMTpro); K9(TMTpro)	1	P62081	P62081	0	3	0.3369	0	1	1	559.318	1675.94	1675.94	0.82	0.00046	CID (Collision Induced Dissociation)	MS2	0	20.2	13.664	48.6289	6660	201015L_YASAM07425_YAII63-13.raw	F4.9	19920.7	13895.1	25412.1	19692.6	17162.8	29884.2	26509.4	20451.8	6010.05	17494.3	23087.4	24074	22754.3	25113.7	23470.8	16114		3.74	1	FALSE	0.0001042	5.467e-05
High	Unambiguous	[K].aEGAQNQGQk.[G]	N-Term(TMTpro); K10(TMTpro)	1	Q9P2E9	Q9P2E9	0	2	0.4899	0	1	1	819.956	1638.91	1638.91	-0.26	-0.00021	CID (Collision Induced Dissociation)	MS2	0	17.1	97.303	48.2066	6495	201015L_YASAM07425_YAII63-13.raw	F4.9	3875.48	3389.48	4740.45	4099.28	3715.83	5381.13	5388.53	5332.62	836.865	4084.23	4418.98	5022.91	3825.08	5791.6	5174.62	3541.14		3.45	1	FALSE	0.0001042	3.598e-05
High	Unambiguous	[R].nQGGYGGSSSSSSYGSGR.[R]	N-Term(TMTpro)	1	P09651	P09651	0	2	0.8537	0	1	1	999.955	1998.9	1998.91	-1.88	-0.00187	CID (Collision Induced Dissociation)	MS2	31.593	8.2	74.58	48.1175	6461	201015L_YASAM07425_YAII63-13.raw	F4.9	2149.76	2007.95	2004.13	1954.29	1661.69	2703.62	2284.3	2614.91	1509.83	1843.33	1551.85	2061.85	2326.62	2164.42	2660.7	1474.73		5.88	1	FALSE	0.0001042	8.126e-09
High	Unambiguous	[R].aSTSSSSSSSSNQQTEk.[E]	N-Term(TMTpro); K17(TMTpro)	1	P51965	P51965	0	2	0.6372	0	1	1	1156.08	2311.14	2311.15	-2.67	-0.00308	CID (Collision Induced Dissociation)	MS2	64.0415	0.2	72.59	48.0189	6424	201015L_YASAM07425_YAII63-13.raw	F4.9										656.672								5.21	1	FALSE	0.0001042	1.444e-07
High	Unambiguous	[K].nNHHEENISSk.[M]	N-Term(TMTpro); K11(TMTpro)	1	Q13813	Q13813	0	3	0.4586	0	1	1	639.674	1917.01	1917.01	-0.04	-3e-05	CID (Collision Induced Dissociation)	MS2	31.0854	18	50.35	47.9364	6395	201015L_YASAM07425_YAII63-13.raw	F4.9	3729.7	3586.88	6335.87	4255.79	4821.65	4985.82	6294.58	4123.63	1174.38	4021.74	5163.35	5946.73	4602.23	5897.7	4777.86	3718.33		3.14	1	FALSE	0.0001042	6.09e-05
High	Unambiguous	[K].aEGGGGGGRPGAPAAGDGk.[T]	N-Term(TMTpro); K19(TMTpro)	1	Q00839	Q00839	0	3	0.3771	0	1	1	716.387	2147.15	2147.14	0.16	0.00011	CID (Collision Induced Dissociation)	MS2	7.62199	15.4	5.617	51.3755	7806	201015L_YASAM07425_YAII63-13.raw	F4.9	17745.2	16964.8	23075.2	22844.4	17750	32013.2	30739.7	22079.2	3295.06	17817.5	21924.6	29962.4	18119.9	21560.5	17571	12345.3		3.5	1	FALSE	0.0001042	7.425e-05
High	Unambiguous	[R].gcVVTSVESNSNGR.[K]	N-Term(TMTpro); C2(Carbamidomethyl)	1	P08567	P08567	0	2	0.3429	0	1	1	885.441	1769.88	1769.88	-1.17	-0.00104	CID (Collision Induced Dissociation)	MS2	38.9351	26.5	17.16	56.5895	10008	201015L_YASAM07425_YAII63-13.raw	F4.9	7828.02	6476.8	6858.29	5654.26	4412.25	7367.84	7566.44	6182.51	3250.52	5863.21	8974.45	9407.12	6919.9	6981.12	6345.87	5275		3.47	1	FALSE	0.0001042	6.207e-05
High	Unambiguous	[R].nTDQASmPDNTAAQk.[V]	N-Term(TMTpro); M7(Oxidation); K15(TMTpro)	2	P35579	P35749; P35579	0	2	0.6083	0	1	1	1108.56	2216.11	2216.11	0.22	0.00025	CID (Collision Induced Dissociation)	MS2	0	2.2	119.5	51.6125	7917	201015L_YASAM07425_YAII63-13.raw	F4.9	601.889		1019.33			1275	697.768	644.307		643.148	517.255	1487.63		988.229		494.274		5.08	1	FALSE	0.0001042	1.174e-08
High	Unambiguous	[K].tANDmIHAENMR.[L]	N-Term(TMTpro); M5(Oxidation)	1	P26038	P26038	0	2	0.4745	0	1	1	861.915	1722.82	1722.82	0.18	0.00015	CID (Collision Induced Dissociation)	MS2	0	27	47.71	52.0451	8122	201015L_YASAM07425_YAII63-13.raw	F4.9	6895.54	6437.07	7480.36	7939.17	7630.02	7938.71	8132.5	5963.89	3188.21	7709.14	7347.74	8290.69	5285.35	8045.1	8107.61	6608.46		3.14	1	FALSE	0.0001042	3.876e-05
High	Unambiguous	[K].sSQTSGTNEQSSAIVSAR.[D]	N-Term(TMTpro)	1	O60763	O60763	0	2	0.6388	0	1	1	1057.54	2114.07	2114.06	1.05	0.00111	CID (Collision Induced Dissociation)	MS2	0	4.7	45.653	53.1216	8611	201015L_YASAM07425_YAII63-13.raw	F4.9	1201.94	1504.59	1770.06	1748	636.725	2004.79	2078.73	1496.07			1110.75	819.789	745.315	1569.89	1411.53	756.729		6.34	1	FALSE	0.0001042	2.148e-08
High	Unambiguous	[K].qAEVANQETk.[E]	N-Term(TMTpro); K10(TMTpro)	1	P05114	P05114	0	2	0.5568	0	1	1	863.483	1725.96	1725.96	-2.61	-0.00225	CID (Collision Induced Dissociation)	MS2	0	44.7	20.437	53.1186	8609	201015L_YASAM07425_YAII63-13.raw	F4.9	12340.6	11089.3	11107.1	10205.9	9429.79	14999.9	13715.2	8957.98	3442.57	6194.88	18100.4	13726.2	12824.9	12997.2	17393.7	6078.77		4.4	1	FALSE	0.0001042	0.0002558
High	Unambiguous	[K].eSGEGQGGYAk.[E]	N-Term(TMTpro); K11(TMTpro)	1	Q13423	Q13423	0	2	0.4828	0	1	1	845.948	1690.89	1690.89	-0.27	-0.00023	CID (Collision Induced Dissociation)	MS2	24.5605	58.8	75.17	53.0516	8578	201015L_YASAM07425_YAII63-13.raw	F4.9	15456	11959.4	17336.5	16972	12005	19945.5	21228.8	13670.8	5097.88	13473.6	16145.5	20670.6	14114	18277.3	12689.3	10454.6		3.19	1	FALSE	0.0001042	0.0002065
High	Unambiguous	[R].eTPSQENGPTAk.[A]	N-Term(TMTpro); K12(TMTpro)	1	O15355	O15355	0	2	0.3805	0	1	1	934.006	1867	1867.01	-0.77	-0.00072	CID (Collision Induced Dissociation)	MS2	0	35.8	27.253	53.0445	8574	201015L_YASAM07425_YAII63-13.raw	F4.9	8367.27	7899.43	10457.9	9315.31	8475.23	11773	12139.2	8113.31	2482.96	7068.67	9752.32	10756.1	9466.69	13292.3	11103.8	5972.57		4.52	1	FALSE	0.0001042	2.113e-05
High	Unambiguous	[K].tATPQQAQEVHEk.[L]	N-Term(TMTpro); K13(TMTpro)	1	P60174	P60174	0	2	0.6106	0	1	1	1038.07	2075.14	2075.14	-0.91	-0.00095	CID (Collision Induced Dissociation)	MS2	0	27.3	30.21	52.929	8517	201015L_YASAM07425_YAII63-13.raw	F4.9	4992.79	4966.15	6796.5	6863.09	5522.99	11009.6	9460.66	5974.15	1193.28	4585.33	6775.16	10895.9	6766.71	9805.94	9639.54	3812.26		5.65	1	FALSE	0.0001042	1.186e-05
High	Unambiguous	[K].aTDLGGTSQAGTSQR.[F]	N-Term(TMTpro)	1	Q7Z2W4	Q7Z2W4	0	2	0.3668	0	1	1	877.451	1753.9	1753.9	-2.45	-0.00215	CID (Collision Induced Dissociation)	MS2	20.1287	40.2	12.097	52.8086	8462	201015L_YASAM07425_YAII63-13.raw	F4.9	10063.9	8997.8	10803.5	8719.46	8364.88	9244.11	10899.9	9895.45	5084.01	9282.08	12451.8	10968.2	10265.9	11511.8	12309.9	7910.67		3.49	1	FALSE	0.0001042	0.0002998
High	Unambiguous	[R].aSEDTTSGSPPk.[K]	N-Term(TMTpro); K12(TMTpro)	1	Q9BZZ5	Q9BZZ5	0	2	0.2226	0	1	1	892.978	1784.95	1784.95	-1.9	-0.0017	CID (Collision Induced Dissociation)	MS2	84.341	48.9	21.869	52.7361	8429	201015L_YASAM07425_YAII63-13.raw	F4.9	13325.6	11497.7	12345.1	12870.4	10983.2	15377.1	15506.5	10617.2	5733.64	12039.2	12931.6	16034	13452.6	14336	11219	8488.26		2.65	1	FALSE	0.0001042	0.0002128
High	Unambiguous	[K].eTDSSSASAATPSk.[K]	N-Term(TMTpro); K14(TMTpro)	1	P54578	P54578	0	2	0.5907	0	1	1	974.011	1947.02	1947.02	-0.48	-0.00046	CID (Collision Induced Dissociation)	MS2	23.4868	14.4	119.5	52.6555	8388	201015L_YASAM07425_YAII63-13.raw	F4.9	2763.28	2695.66	5465.75	5088.49	2997.31	5404.68	4750.07	3888.88		3104.67	4220.81	4401.19	2865.22	4593.81	2791.51	3070.14		4.08	1	FALSE	0.0001042	1.65e-07
High	Unambiguous	[K].tTHFVEGGDAGNR.[E]	N-Term(TMTpro)	1	P18124	P18124	0	2	0.4869	0	1	1	832.918	1664.83	1664.83	-1.14	-0.00095	CID (Collision Induced Dissociation)	MS2	0	22.2	48.122	52.549	8338	201015L_YASAM07425_YAII63-13.raw	F4.9	6585.92	5524.17	9176.37	5816.31	5770.91	7345.12	6129.54	4833.46	2524.85	4717.52	6302.97	8718.78	5270.45	5548.06	4114.92	3646.5		3.43	1	FALSE	0.0001042	2.638e-05
High	Unambiguous	[R].aQGEPVAGHESPk.[I]	N-Term(TMTpro); K13(TMTpro)	1	O94979	O94979	0	3	0.403	0	1	1	639.023	1915.05	1915.05	0.64	0.00041	CID (Collision Induced Dissociation)	MS2	0	36.1	8.134	52.4574	8297	201015L_YASAM07425_YAII63-13.raw	F4.9	13291.5	10316.6	16862.9	13774.8	10455.1	17991.7	18586	11457.2	4258.04	9588.96	13183.8	17610.2	14743	17541.2	13215.8	9532.44		3.35	1	FALSE	0.0001042	0.0002997
High	Unambiguous	[K].dAQHYGGWEHR.[D]	N-Term(TMTpro)	1	Q14697	Q14697	0	2	0.5118	0	1	1	830.401	1659.79	1659.79	-0.22	-0.00018	CID (Collision Induced Dissociation)	MS2	27.158	25.9	40.964	52.4319	8288	201015L_YASAM07425_YAII63-13.raw	F4.9	6734.07	6329.47	7822.81	7141.88	5146.6	7753.59	7053.5	7025.2	2565.56	5310.41	7899.4	8729.3	6153.74	7228.18	5569.78	5507.65		2.97	1	FALSE	0.0001042	3.768e-05
High	Unambiguous	[K].tTHFVEGGDAGNR.[E]	N-Term(TMTpro)	1	P18124	P18124	0	2	0.5313	0	1	1	832.919	1664.83	1664.83	0.33	0.00028	CID (Collision Induced Dissociation)	MS2	30.211	18.7	32.651	52.2896	8228	201015L_YASAM07425_YAII63-13.raw	F4.9	6460.95	3302	6236.7	5136.08	4103.47	6157.79	3223.6	4498.34	1933.34	4014.29	5413.13	5981.47	4248.21	4931.92	3315.56	4335.01		3.35	1	FALSE	0.0001042	7.595e-05
High	Unambiguous	[K].eGTGSTATSSSSTAGAAGk.[G]	N-Term(TMTpro); K19(TMTpro)	1	O15372	O15372	0	3	0.3522	0	1	1	746.056	2236.15	2236.15	-0.83	-0.00062	CID (Collision Induced Dissociation)	MS2	29.8501	14	74.321	52.2476	8210	201015L_YASAM07425_YAII63-13.raw	F4.9	2866.35	2294.19	4128.22	4421.68	3505.63	4160.76	3363.17	3337.56	1097.33	3298.14	5186.94	4616.98	3270.69	4658.96	4493.39	1798.18		3.18	1	FALSE	0.0001042	3.933e-05
High	Unambiguous	[K].eGTGSTATSSSSTAGAAGk.[G]	N-Term(TMTpro); K19(TMTpro)	1	O15372	O15372	0	2	0.6991	0	1	1	1118.58	2236.15	2236.15	-1.76	-0.00196	CID (Collision Induced Dissociation)	MS2	0	0.2	119.5	52.1624	8174	201015L_YASAM07425_YAII63-13.raw	F4.9														722.502				7.51	1	FALSE	0.0001042	7.639e-12
High	Unambiguous	[K].tANDmIHAENMR.[L]	N-Term(TMTpro); M5(Oxidation)	1	P26038	P26038	0	2	0.5619	0	1	1	861.915	1722.82	1722.82	-0.11	-9e-05	CID (Collision Induced Dissociation)	MS2	54.8168	34.5	21.838	52.1265	8159	201015L_YASAM07425_YAII63-13.raw	F4.9	9063.25	6563.91	7616.34	10028.8	8012.92	9499.94	10354.7	8604.82	4403.13	6770.56	10290.9	9716.04	9662.12	7871.44	10346.6	6256.09		2.99	1	FALSE	0.0001042	3.02e-05
High	Unambiguous	[R].sHYEEGPGk.[N]	N-Term(TMTpro); K9(TMTpro)	1	P15954	P15954	0	2	0.5243	0	1	1	806.434	1611.86	1611.86	-0.76	-0.00062	CID (Collision Induced Dissociation)	MS2	32.2824	38.8	30.315	51.6854	7952	201015L_YASAM07425_YAII63-13.raw	F4.9	8594.16	7938.92	13495	11330.5	10872	11088	15717	9839.96	3048.87	5358.98	13008.5	7353.66	6424.76	15540.7	10021	7830.16		2.88	1	FALSE	0.0001042	0.0003298
High	Unambiguous	[K].hVEQNGEk.[F]	N-Term(TMTpro); K8(TMTpro)	1	Q96L92	Q96L92	0	3	0.4767	0	1	1	516.959	1548.86	1548.86	-0.11	-6e-05	CID (Collision Induced Dissociation)	MS2	0	39.1	26.26	47.8426	6365	201015L_YASAM07425_YAII63-13.raw	F4.9	10790.5	11049.6	10089.9	10636	9613.19	11517.7	11665.9	10416.3	3958.79	10093.1	12281.8	10993.8	8660.06	12528.3	10538.7	7972.54		3.86	1	FALSE	0.0001042	0.0001185
High	Unambiguous	[K].eEPSVAPSSTGk.[T]	N-Term(TMTpro); K12(TMTpro)	1	Q8N183	Q8N183	0	2	0.4459	0	1	1	898.997	1796.99	1796.99	-1.49	-0.00134	CID (Collision Induced Dissociation)	MS2	0	30.5	54.41	56.6745	10046	201015L_YASAM07425_YAII63-13.raw	F4.9	8296.53	6799.21	9551.23	8154.52	6008.57	9454.16	6907.67	5901.22	3412.06	6510.44	8186.11	10232.2	7507.09	11186.9	7298.43	5211.88		3.88	1	FALSE	0.0001042	0.0001499
High	Unambiguous	[R].lQSIGTENTEENRR.[F]	N-Term(TMTpro)	1	P04075	P04075	1	2	0.3026	0	1	1	976.01	1951.01	1951.02	-2.06	-0.00201	CID (Collision Induced Dissociation)	MS2	0	17.6	119.5	56.7673	10073	201015L_YASAM07425_YAII63-13.raw	F4.9	4657.8	4364.01	4388.14	4635.96	3876.5	4944.91	5811.38	4249.1	2595.24	4669.34	5072.48	4734.81	4746.29	5251.67	3588.22	3631.55		4.23	1	FALSE	0.0001042	5.515e-05
High	Unambiguous	[K].tGVAGEDMQDNSGTYGk.[I]	N-Term(TMTpro); K17(TMTpro)	1	Q05655	Q05655	0	2	0.7318	0	1	1	1169.58	2338.14	2338.15	-1.32	-0.00154	CID (Collision Induced Dissociation)	MS2	0	3	72.47	59.2307	11097	201015L_YASAM07425_YAII63-13.raw	F4.9	850.898	666.236	846.146	911.62		976.056	1839.35	1430.3			696.913	875.359	796.697	883.588	1175.39			5.63	1	FALSE	0.0001042	1.271e-08
High	Unambiguous	[R].sPDELPSAGGDGGk.[S]	N-Term(TMTpro); K14(TMTpro)	1	O60610	O60610	0	2	0.6259	0	1	1	948.002	1895	1895	-1.49	-0.00141	CID (Collision Induced Dissociation)	MS2	0	25.1	25.016	59.2281	11096	201015L_YASAM07425_YAII63-13.raw	F4.9	5472.52	6389.15	7703.22	7552.6	4421.07	8447.99	9458.25	5697.62	2198.14	4975.84	7112.74	8142.75	6066.31	8875.45	9970.47	4489.93		4.25	1	FALSE	0.0001042	1.765e-05
High	Unambiguous	[K].gEENLmDAQVk.[A]	N-Term(TMTpro); M6(Oxidation); K11(TMTpro)	1	P50990	P50990	0	2	0.4389	0	1	1	929.498	1857.99	1857.99	1.27	0.00118	CID (Collision Induced Dissociation)	MS2	7.21171	45.9	22.052	59.2161	11090	201015L_YASAM07425_YAII63-13.raw	F4.9	8852.71	8888.27	12144.2	12615.2	9643.71	15500.8	15205.5	13662.3	3118.15	8614.56	11796.4	14576	12448.7	14368.7	13017.4	8244.78		3.6	1	FALSE	0.0001042	0.0001816
High	Unambiguous	[K].vGGTSDVEVNEk.[K]	N-Term(TMTpro); K12(TMTpro)	1	P10809	P10809	0	3	0.4879	0	1	1	614.674	1842.01	1842.01	-0.59	-0.00036	CID (Collision Induced Dissociation)	MS2	11.6985	16.9	2.581	59.2125	11088	201015L_YASAM07425_YAII63-13.raw	F4.9	52970.4	52869.8	69729	64457.5	39860.5	88052.6	99660	67086	9645.27	36875.5	62508.3	86806.7	57715.2	87372	63843.1	47331.4		4.14	1	FALSE	0.0001042	0.0002542
High	Unambiguous	[R].eSTGAQVQVAGDmLPNSTER.[A]	N-Term(TMTpro); M13(Oxidation)	3	Q15366; Q15365	P57721; Q15366; Q15365	0	2	0.6713	0	1	1	1205.59	2410.18	2410.18	-0.83	-0.001	CID (Collision Induced Dissociation)	MS2	0	1.8	119.5	59.1593	11065	201015L_YASAM07425_YAII63-13.raw	F4.9		711.471	670.301	631.08	680.358	1279.5	789.461	685.302						625.83	856.41			5.81	2	FALSE	0.0001042	6.308e-06
High	Unambiguous	[R].nmGGPYGGGNYGPGGSGGSGGYGGR.[S]	N-Term(TMTpro); M2(Oxidation)	1	P22626	P22626	0	2	0.7083	0	1	1	1255.56	2510.11	2510.11	0.8	0.001	CID (Collision Induced Dissociation)	MS2	26.361	1.8	71.78	59.1429	11058	201015L_YASAM07425_YAII63-13.raw	F4.9	737.907			644.631	550.014	795.798	811.909	939.125		635.093	724.828	1164.16		733.226				4.8	1	FALSE	0.0001042	0.0003671
[truncated: 38,192 more rows]

## Sheet: Table S8 Proteins (S vs DMSO)
symbol	FC [fold change abundances (S/DMSO)]	logFC	P.Value	adj.P.Val	logPval
[truncated: 1,585 more rows]

[truncated: 2 more sheets: Table S9 Proteins (R vs DMSO), TableS10 Proteins (rac vs DMSO)]
