# Supplementary material for: The contribution of cyclic imide stereoisomers on cereblon-dependent activity
Source: Chem Sci. 2025 May 28;16(25):11519–29. doi: 10.1039/d5sc01371b (PMC12117711; doi:10.1039/d5sc01371b)
Supplement: SC-016-D5SC01371B-s003 [file SC-016-D5SC01371B-s003.xlsx]

## Sheet: Table S3
Table S2 i-pLen pair1 PSMs
Confidence	PSM Ambiguity	Annotated Sequence	Modifications	# Proteins	Activation Type	Master Protein Accessions	# Missed Cleavages	Charge	DeltaScore	DeltaCn	Search Engine Rank	m/z [Da]	MH+ [Da]	Theo. MH+ [Da]	DeltaM [ppm]	Deltam/z [Da]	MS Order	Isolation Interference [%]	Ion Inject Time [ms]	RT [min]	First Scan	XCorr	# Protein Groups
Medium	Unambiguous	VNPhGY	H4(4-amide-pLEN-12C)	1	HCD (High Energy Collision Dissociation)	pet28a_-_CULT_translation	0	2	0.027	0	1	598.768	1196.53	1196.52	3.57	0.00214	MS2	5.81382	40.783	53.6366	5303	1.48	1
Low	Unambiguous	VNPhGY	H4(4-amide-pLEN-12C)	1	EThcD (ETD With Supplemental HCD)	pet28a_-_CULT_translation	0	2	0.0614	0	1	598.768	1196.53	1196.52	3.57	0.00214	MS2	5.81382	200	53.6463	5306	1.14	1
Low	Unambiguous	VNPhGY	H4(4-amide-pLEN-12C)	1	CID (Collision Induced Dissociation)	pet28a_-_CULT_translation	0	2	0.0148	0	1	598.768	1196.53	1196.52	3.57	0.00214	MS2	5.81382	35	53.7047	5309	1.35	1
Medium	Unambiguous	VNPhGY	H4(4-amide-pLEN-12C)	1	HCD (High Energy Collision Dissociation)	pet28a_-_CULT_translation	0	2	0.0203	0	1	598.767	1196.53	1196.52	2.24	0.00134	MS2	9.13065	100	53.8751	5334	1.48	1
Low	Unambiguous	VNPhGY	H4(4-amide-pLEN-12C)	1	EThcD (ETD With Supplemental HCD)	pet28a_-_CULT_translation	0	2	0.1194	0	1	598.767	1196.53	1196.52	2.24	0.00134	MS2	9.13065	115.096	53.8841	5336	1.34	1
Low	Unambiguous	VNPhGY	H4(4-amide-pLEN-12C)	1	CID (Collision Induced Dissociation)	pet28a_-_CULT_translation	0	2	0.1974	0	1	598.767	1196.53	1196.52	2.24	0.00134	MS2	9.13065	23.019	53.9183	5338	1.52	1
Medium	Unambiguous	VNPhGY	H4(4-amide-pLEN-12C)	1	HCD (High Energy Collision Dissociation)	pet28a_-_CULT_translation	0	2	0.0224	0	1	598.769	1196.53	1196.52	4.9	0.00293	MS2	48.9691	100	54.4762	5415	1.34	1
Low	Unambiguous	VNPhGY	H4(4-amide-pLEN-12C)	1	EThcD (ETD With Supplemental HCD)	pet28a_-_CULT_translation	0	2	0.0719	0	1	598.769	1196.53	1196.52	4.9	0.00293	MS2	48.9691	200	54.5011	5417	1.39	1
Low	Unambiguous	VNPhGY	H4(4-amide-pLEN-12C)	1	CID (Collision Induced Dissociation)	pet28a_-_CULT_translation	0	2	0.1224	0	1	598.769	1196.53	1196.52	4.9	0.00293	MS2	48.9691	35	54.5251	5420	0.98	1
Low	Unambiguous	VNPhGY	H4(4-amide-pLEN-12C)	1	HCD (High Energy Collision Dissociation)	pet28a_-_CULT_translation	0	2	0.0581	0	1	598.768	1196.53	1196.52	2.35	0.0014	MS2	54.884	100	54.7085	5446	0.86	1
Low	Unambiguous	VNPhGY	H4(4-amide-pLEN-12C)	1	EThcD (ETD With Supplemental HCD)	pet28a_-_CULT_translation	0	2	0.1504	0	1	598.768	1196.53	1196.52	2.35	0.0014	MS2	54.884	71.158	54.7293	5448	1.33	1
Low	Unambiguous	VNPhGY	H4(4-amide-pLEN no click)	1	HCD (High Energy Collision Dissociation)	pet28a_-_CULT_translation	0	2	0.0968	0	1	526.736	1052.47	1052.46	4.82	0.00254	MS2	9.53836	100	60.1969	6299	1.24	1
Low	Unambiguous	VNPhGY	H4(4-amide-pLEN no click)	1	EThcD (ETD With Supplemental HCD)	pet28a_-_CULT_translation	0	2	0.2138	0	1	526.736	1052.47	1052.46	4.82	0.00254	MS2	9.53836	200	60.2137	6301	1.45	1
Low	Unambiguous	VNPhGY	H4(4-amide-pLEN no click)	1	CID (Collision Induced Dissociation)	pet28a_-_CULT_translation	0	2	0.0292	0	1	526.736	1052.47	1052.46	4.82	0.00254	MS2	9.53836	35	60.2325	6304	1.37	1
Low	Unambiguous	VNPhGY	H4(4-amide-pLEN no click)	1	HCD (High Energy Collision Dissociation)	pet28a_-_CULT_translation	0	2	0.084	0	1	526.736	1052.47	1052.46	4.36	0.00229	MS2	0	100	60.3706	6327	1.19	1
Low	Unambiguous	VNPhGY	H4(4-amide-pLEN no click)	1	EThcD (ETD With Supplemental HCD)	pet28a_-_CULT_translation	0	2	0.1888	0	1	526.736	1052.47	1052.46	4.36	0.00229	MS2	0	200	60.3787	6329	1.43	1
Low	Unambiguous	VNPhGY	H4(4-amide-pLEN no click)	1	CID (Collision Induced Dissociation)	pet28a_-_CULT_translation	0	2	0.0692	0	1	526.736	1052.47	1052.46	4.36	0.00229	MS2	0	35	60.4097	6331	1.3	1
Low	Unambiguous	VNPhGY	H4(4-amide-pLEN no click)	1	HCD (High Energy Collision Dissociation)	pet28a_-_CULT_translation	0	2	0.0855	0	1	526.736	1052.46	1052.46	4.12	0.00217	MS2	59.9812	100	61.0373	6438	1.17	1
Low	Unambiguous	VNPhGY	H4(4-amide-pLEN no click)	1	EThcD (ETD With Supplemental HCD)	pet28a_-_CULT_translation	0	2	0.1597	0	1	526.736	1052.46	1052.46	4.12	0.00217	MS2	59.9812	200	61.0456	6440	1.44	1
Low	Unambiguous	VNPhGY	H4(4-amide-pLEN no click)	1	CID (Collision Induced Dissociation)	pet28a_-_CULT_translation	0	2	0.1818	0	1	526.736	1052.46	1052.46	4.12	0.00217	MS2	59.9812	35	61.0753	6442	1.54	1
Low	Unambiguous	VNPhGY	H4(4-amide-pLEN no click)	1	HCD (High Energy Collision Dissociation)	pet28a_-_CULT_translation	0	2	0.0678	0	1	526.735	1052.46	1052.46	2.62	0.00138	MS2	1.51585	100	61.1767	6460	1.18	1
Low	Unambiguous	VNPhGY	H4(4-amide-pLEN no click)	1	EThcD (ETD With Supplemental HCD)	pet28a_-_CULT_translation	0	2	0.1712	0	1	526.735	1052.46	1052.46	2.62	0.00138	MS2	1.51585	175.815	61.1851	6462	1.46	1
Low	Unambiguous	VNPhGY	H4(4-amide-pLEN no click)	1	CID (Collision Induced Dissociation)	pet28a_-_CULT_translation	0	2	0.16	0	1	526.735	1052.46	1052.46	2.62	0.00138	MS2	1.51585	35	61.2127	6464	1.5	1
Low	Unambiguous	VNPhGY	H4(4-amide-pLEN no click)	1	HCD (High Energy Collision Dissociation)	pet28a_-_CULT_translation	0	2	0.0826	0	1	526.736	1052.46	1052.46	3.89	0.00205	MS2	0	100	61.7123	6545	1.21	1
Low	Unambiguous	VNPhGY	H4(4-amide-pLEN no click)	1	EThcD (ETD With Supplemental HCD)	pet28a_-_CULT_translation	0	2	0.1538	0	1	526.736	1052.46	1052.46	3.89	0.00205	MS2	0	200	61.7205	6547	1.43	1
Low	Unambiguous	VNPhGY	H4(4-amide-pLEN no click)	1	CID (Collision Induced Dissociation)	pet28a_-_CULT_translation	0	2	0.0534	0	1	526.736	1052.46	1052.46	3.89	0.00205	MS2	0	35	61.7528	6549	1.31	1
Low	Unambiguous	VNPhGY	H4(4-amide-pLEN no click)	1	HCD (High Energy Collision Dissociation)	pet28a_-_CULT_translation	0	2	0.084	0	1	526.735	1052.46	1052.46	2.85	0.0015	MS2	0.283423	100	61.901	6576	1.19	1
Low	Unambiguous	VNPhGY	H4(4-amide-pLEN no click)	1	EThcD (ETD With Supplemental HCD)	pet28a_-_CULT_translation	0	2	0.2429	0	1	526.735	1052.46	1052.46	2.85	0.0015	MS2	0.283423	84.658	61.9092	6577	1.4	1
Low	Unambiguous	VNPhGY	H4(4-amide-pLEN no click)	1	CID (Collision Induced Dissociation)	pet28a_-_CULT_translation	0	2	0.0493	0	1	526.735	1052.46	1052.46	2.85	0.0015	MS2	0.283423	16.932	61.9222	6578	1.42	1
Low	Unambiguous	VNPhGY	H4(4-amide-pLEN no click)	1	HCD (High Energy Collision Dissociation)	pet28a_-_CULT_translation	0	2	0.069	0	1	526.737	1052.47	1052.46	5.4	0.00284	MS2	0	100	62.5572	6681	1.16	1
Low	Unambiguous	VNPhGY	H4(4-amide-pLEN no click)	1	EThcD (ETD With Supplemental HCD)	pet28a_-_CULT_translation	0	2	0.2536	0	1	526.737	1052.47	1052.46	5.4	0.00284	MS2	0	200	62.5617	6684	1.38	1
Low	Rejected	VNPhGY	H4(4-amide-pLEN no click)	1	CID (Collision Induced Dissociation)	pet28a_-_CULT_translation	0	2	0.013	0	1	526.737	1052.47	1052.46	5.4	0.00284	MS2	0	35	62.5893	6686	0.77	1
Low	Unambiguous	VNPhGY	H4(4-amide-pLEN no click)	1	HCD (High Energy Collision Dissociation)	pet28a_-_CULT_translation	0	2	0.0721	0	1	526.736	1052.46	1052.46	3.66	0.00193	MS2	0	100	62.6323	6695	1.11	1
Low	Unambiguous	VNPhGY	H4(4-amide-pLEN no click)	1	EThcD (ETD With Supplemental HCD)	pet28a_-_CULT_translation	0	2	0.2628	0	1	526.736	1052.46	1052.46	3.66	0.00193	MS2	0	200	62.6398	6697	1.37	1
Low	Unambiguous	VNPhGY	H4(4-amide-pLEN no click)	1	CID (Collision Induced Dissociation)	pet28a_-_CULT_translation	0	2	0.013	0	1	526.736	1052.46	1052.46	3.66	0.00193	MS2	0	35	62.6712	6699	0.77	1
High	Unambiguous	VNPHGyVHETL	Y6(4-amide-pLEN-12C)	1	HCD (High Energy Collision Dissociation)	pet28a_-_CULT_translation	1	3	0.0199	0	1	592.617	1775.84	1775.83	4.93	0.00292	MS2	0	100	66.4758	7326	2.51	1
High	Unambiguous	VNPHGyVHETL	Y6(4-amide-pLEN-12C)	1	EThcD (ETD With Supplemental HCD)	pet28a_-_CULT_translation	1	3	0.1406	0	1	592.617	1775.84	1775.83	4.93	0.00292	MS2	0	200	66.4816	7329	5.12	1
Low	Selected	VNPHGyVHETL	Y6(4-amide-pLEN-12C)	1	HCD (High Energy Collision Dissociation)	pet28a_-_CULT_translation	1	2	0.025	0	1	888.42	1775.83	1775.83	3.7	0.00328	MS2	15.448	100	66.7223	7366	0.8	1
Medium	Unambiguous	VNPHGyVHETL	Y6(4-amide-pLEN-12C)	1	EThcD (ETD With Supplemental HCD)	pet28a_-_CULT_translation	1	2	0.1455	0	1	888.42	1775.83	1775.83	3.7	0.00328	MS2	15.448	200	66.739	7368	2.13	1
Medium	Unambiguous	VNPHGyVHETL	Y6(4-amide-pLEN no click)	1	EThcD (ETD With Supplemental HCD)	pet28a_-_CULT_translation	1	3	0.0335	0	1	544.594	1631.77	1631.76	3.42	0.00186	MS2	70.8814	200	76.3939	8947	3.28	1
Low	Unambiguous	VNPHGyVHETL	Y6(4-amide-pLEN no click)	1	HCD (High Energy Collision Dissociation)	pet28a_-_CULT_translation	1	3	0.0576	0	1	544.593	1631.77	1631.76	1.96	0.00107	MS2	0	100	77.6069	9136	1.91	1
High	Unambiguous	VNPHGyVHETL	Y6(4-amide-pLEN no click)	1	EThcD (ETD With Supplemental HCD)	pet28a_-_CULT_translation	1	3	0.0794	0	1	544.593	1631.77	1631.76	1.96	0.00107	MS2	0	200	77.6237	9138	4.28	1

## Sheet: Table S4
Table S3 i-pLen pair1 quantification
Confidence	PSM Ambiguity	Annotated Sequence	Modifications	Charge	15N_fraction_mean	15N_fraction_sd	RT [min]	First Scan	# Proteins	Master Protein Accessions	# Missed Cleavages	DeltaScore	DeltaCn	Rank	Search Engine Rank	m/z [Da]	MH+ [Da]	Theo. MH+ [Da]	DeltaM [ppm]	Deltam/z [Da]	Activation Type	MS Order	Isolation Interference [%]	Ion Inject Time [ms]	XCorr	# Protein Groups	activation	idx_duty_cycle	MS2_others	target_mz	MS2_etd
Medium	Unambiguous	VNPhGY	H4(4-amide-pLEN-12C)	2	-0.0314794	0.00623107	53.6366	5303	1	pet28a_-_CULT_translation	0	0.027	0	1	1	598.768	1196.53	1196.52	3.57	0.00214	HCD	MS2	5.81382	40.783	1.48	1	hcd	3064	5303	598.768	5306
Medium	Unambiguous	VNPhGY	H4(4-amide-pLEN-12C)	2	-0.0331905	0.00646891	53.8751	5334	1	pet28a_-_CULT_translation	0	0.0203	0	1	1	598.767	1196.53	1196.52	2.24	0.00134	HCD	MS2	9.13065	100	1.48	1	hcd	3065	5334	598.767	5336
Medium	Unambiguous	VNPhGY	H4(4-amide-pLEN-12C)	2	-0.0426476	0.00631462	54.4762	5415	1	pet28a_-_CULT_translation	0	0.0224	0	1	1	598.769	1196.53	1196.52	4.9	0.00293	HCD	MS2	48.9691	100	1.34	1	hcd	3070	5415	598.769	5417
Low	Unambiguous	VNPHgY	G5(4-amide-pLEN-12C)	2	-0.0119304	0.00633015	54.7085	5446	1	pet28a_-_CULT_translation	0	0.0581	0	1	1	598.768	1196.53	1196.52	2.35	0.0014	HCD	MS2	54.884	100	0.86	1	hcd	3071	5446	598.768	5448
Medium	Unambiguous	VNPhGY	H4(4-amide-pLEN no click)	2	0.0824027	0.00596402	60.1969	6299	1	pet28a_-_CULT_translation	0	0.0968	0	1	1	526.736	1052.47	1052.46	4.82	0.00254	HCD	MS2	9.53836	100	1.24	1	hcd	3129	6299	526.736	6301
Low	Unambiguous	VNPhGY	H4(4-amide-pLEN no click)	2	0.0887215	0.0057882	60.3706	6327	1	pet28a_-_CULT_translation	0	0.084	0	1	1	526.736	1052.47	1052.46	4.36	0.00229	HCD	MS2	0	100	1.19	1	hcd	3131	6327	526.736	6329
Low	Unambiguous	VNPhGY	H4(4-amide-pLEN no click)	2	0.0734232	0.0055422	61.1767	6460	1	pet28a_-_CULT_translation	0	0.0678	0	1	1	526.735	1052.46	1052.46	2.62	0.00138	HCD	MS2	1.51585	100	1.18	1	hcd	3138	6460	526.735	6462
Low	Unambiguous	VNPhGY	H4(4-amide-pLEN no click)	2	0.0692858	0.00548556	61.7123	6545	1	pet28a_-_CULT_translation	0	0.0826	0	1	1	526.736	1052.46	1052.46	3.89	0.00205	HCD	MS2	0	100	1.21	1	hcd	3148	6545	526.736	6547
Low	Unambiguous	VNPhGY	H4(4-amide-pLEN no click)	2	0.0593799	0.0059778	61.901	6576	1	pet28a_-_CULT_translation	0	0.084	0	1	1	526.735	1052.46	1052.46	2.85	0.0015	HCD	MS2	0.283423	100	1.19	1	hcd	3149	6576	526.735	6577
Low	Unambiguous	VNPhGY	H4(4-amide-pLEN no click)	2	0.0656992	0.006105	62.5572	6681	1	pet28a_-_CULT_translation	0	0.069	0	1	1	526.737	1052.47	1052.46	5.4	0.00284	HCD	MS2	0	100	1.16	1	hcd	3156	6681	526.737	6684
Low	Unambiguous	VNPhGY	H4(4-amide-pLEN no click)	2	0.0617176	0.00637961	62.6323	6695	1	pet28a_-_CULT_translation	0	0.0721	0	1	1	526.736	1052.46	1052.46	3.66	0.00193	HCD	MS2	0	100	1.11	1	hcd	3157	6695	526.736	6697
High	Unambiguous	VNPHGyVHETL	Y6(4-amide-pLEN-12C)	3	0.927478	0.000832694	66.4758	7326	1	pet28a_-_CULT_translation	1	0.0199	0	1	1	592.617	1775.84	1775.83	4.93	0.00292	HCD	MS2	0	100	2.51	1	hcd	3207	7326	592.615	7329
Low	Unambiguous	VNPHGyVHETL	Y6(4-amide-pLEN-12C)	2	0.92988	0.00103692	66.7223	7366	1	pet28a_-_CULT_translation	1	0.0375	0	1	1	888.42	1775.83	1775.83	3.7	0.00328	HCD	MS2	15.448	100	0.8	1	hcd	3209	7366	888.42	7368
Medium	Unambiguous	VNPHGyVHETL	Y6(4-amide-pLEN no click)	3	0.901512	0.00107094	77.6069	9136	1	pet28a_-_CULT_translation	1	0.0785	0	1	1	544.593	1631.77	1631.76	1.96	0.00107	HCD	MS2	0	100	1.91	1	hcd	3317	9136	544.593	9138

## Sheet: Table S5
Table S4 i-pLen pair2 PSMs
Confidence	PSM Ambiguity	Annotated Sequence	Modifications	# Proteins	Activation Type	Master Protein Accessions	# Missed Cleavages	Charge	DeltaScore	DeltaCn	Search Engine Rank	m/z [Da]	MH+ [Da]	Theo. MH+ [Da]	DeltaM [ppm]	Deltam/z [Da]	MS Order	Isolation Interference [%]	Ion Inject Time [ms]	RT [min]	First Scan	XCorr	# Protein Groups
Medium	Unambiguous	VNPhGY	H4(4-amide-pLEN-12C)	1	HCD (High Energy Collision Dissociation)	pet28a_-_CULT_translation	0	2	0.047	0	1	598.768	1196.53	1196.52	2.55	0.00153	MS2	10.3884	100	53.8785	5319	1.49	1
Low	Unambiguous	VNPhGY	H4(4-amide-pLEN-12C)	1	EThcD (ETD With Supplemental HCD)	pet28a_-_CULT_translation	0	2	0.1037	0	1	598.768	1196.53	1196.52	2.55	0.00153	MS2	10.3884	200	53.8861	5320	1.35	1
Low	Rejected	VNPhGY	H4(4-amide-pLEN-12C)	1	CID (Collision Induced Dissociation)	pet28a_-_CULT_translation	0	2	0.0123	0	1	598.768	1196.53	1196.52	2.55	0.00153	MS2	10.3884	35	53.9079	5321	0.81	1
Medium	Unambiguous	VNPhGY	H4(4-amide-pLEN-12C)	1	HCD (High Energy Collision Dissociation)	pet28a_-_CULT_translation	0	2	0.0634	0	1	598.768	1196.53	1196.52	3.67	0.0022	MS2	0	100	53.9154	5324	1.42	1
Low	Unambiguous	VNPhGY	H4(4-amide-pLEN-12C)	1	EThcD (ETD With Supplemental HCD)	pet28a_-_CULT_translation	0	2	0.1111	0	1	598.768	1196.53	1196.52	3.67	0.0022	MS2	0	200	53.9392	5326	1.35	1
Low	Unambiguous	VNPhGY	H4(4-amide-pLEN-12C)	1	CID (Collision Induced Dissociation)	pet28a_-_CULT_translation	0	2	0.0556	0	1	598.768	1196.53	1196.52	3.67	0.0022	MS2	0	35	53.9629	5329	0.9	1
Medium	Unambiguous	VNPhGY	H4(4-amide-pLEN-12C)	1	HCD (High Energy Collision Dissociation)	pet28a_-_CULT_translation	0	2	0.0197	0	1	598.768	1196.53	1196.52	3.47	0.00208	MS2	10.0288	100	54.4654	5397	1.52	1
Low	Unambiguous	VNPhGY	H4(4-amide-pLEN-12C)	1	EThcD (ETD With Supplemental HCD)	pet28a_-_CULT_translation	0	2	0.0866	0	1	598.768	1196.53	1196.52	3.47	0.00208	MS2	10.0288	200	54.4732	5399	1.27	1
Medium	Unambiguous	VNPhGY	H4(4-amide-pLEN-12C)	1	HCD (High Energy Collision Dissociation)	pet28a_-_CULT_translation	0	2	0.0329	0	1	598.767	1196.53	1196.52	1.63	0.00098	MS2	10.3491	100	54.542	5407	1.52	1
Low	Unambiguous	VNPhGY	H4(4-amide-pLEN-12C)	1	EThcD (ETD With Supplemental HCD)	pet28a_-_CULT_translation	0	2	0.0956	0	1	598.767	1196.53	1196.52	1.63	0.00098	MS2	10.3491	104.673	54.5506	5410	1.36	1
Medium	Unambiguous	VNPhGY	H4(4-amide-pLEN-12C)	1	HCD (High Energy Collision Dissociation)	pet28a_-_CULT_translation	0	2	0.0441	0	1	598.768	1196.53	1196.52	2.86	0.00171	MS2	6.82834	100	55.1011	5483	1.36	1
Low	Unambiguous	VNPhGY	H4(4-amide-pLEN-12C)	1	EThcD (ETD With Supplemental HCD)	pet28a_-_CULT_translation	0	2	0.1119	0	1	598.768	1196.53	1196.52	2.86	0.00171	MS2	6.82834	200	55.1251	5485	1.43	1
Medium	Unambiguous	VNPhGY	H4(4-amide-pLEN-12C)	1	HCD (High Energy Collision Dissociation)	pet28a_-_CULT_translation	0	2	0.0544	0	1	598.767	1196.53	1196.52	2.04	0.00122	MS2	8.46778	100	55.1979	5496	1.47	1
Low	Unambiguous	VNPhGY	H4(4-amide-pLEN-12C)	1	EThcD (ETD With Supplemental HCD)	pet28a_-_CULT_translation	0	2	0.1079	0	1	598.767	1196.53	1196.52	2.04	0.00122	MS2	8.46778	200	55.2216	5498	1.39	1
Low	Unambiguous	VNPhGY	H4(4-amide-pLEN-12C)	1	CID (Collision Induced Dissociation)	pet28a_-_CULT_translation	0	2	0.0154	0	1	598.767	1196.53	1196.52	2.04	0.00122	MS2	8.46778	35	55.2452	5501	0.65	1
Low	Unambiguous	VNPhGY	H4(4-amide-pLEN no click)	1	HCD (High Energy Collision Dissociation)	pet28a_-_CULT_translation	0	2	0.0862	0	1	526.735	1052.46	1052.46	2.85	0.0015	MS2	11.5874	100	61.1884	6387	1.16	1
Low	Unambiguous	VNPhGY	H4(4-amide-pLEN no click)	1	EThcD (ETD With Supplemental HCD)	pet28a_-_CULT_translation	0	2	0.219	0	1	526.735	1052.46	1052.46	2.85	0.0015	MS2	11.5874	200	61.1959	6389	1.37	1
Low	Unambiguous	VNPhGY	H4(4-amide-pLEN no click)	1	CID (Collision Induced Dissociation)	pet28a_-_CULT_translation	0	2	0.0686	0	1	526.735	1052.46	1052.46	2.85	0.0015	MS2	11.5874	35	61.226	6391	1.02	1
Low	Unambiguous	VNPhGY	H4(4-amide-pLEN no click)	1	HCD (High Energy Collision Dissociation)	pet28a_-_CULT_translation	0	2	0.0847	0	1	526.734	1052.46	1052.46	0.88	0.00046	MS2	10.1937	100	61.293	6404	1.18	1
Low	Unambiguous	VNPhGY	H4(4-amide-pLEN no click)	1	EThcD (ETD With Supplemental HCD)	pet28a_-_CULT_translation	0	2	0.1931	0	1	526.734	1052.46	1052.46	0.88	0.00046	MS2	10.1937	200	61.3081	6406	1.45	1
Low	Unambiguous	VNPhGY	H4(4-amide-pLEN no click)	1	CID (Collision Induced Dissociation)	pet28a_-_CULT_translation	0	2	0.0111	0	1	526.734	1052.46	1052.46	0.88	0.00046	MS2	10.1937	35	61.3269	6408	0.9	1
Medium	Unambiguous	VNPhGY	H4(4-amide-pLEN no click)	1	HCD (High Energy Collision Dissociation)	pet28a_-_CULT_translation	0	2	0.0781	0	1	526.736	1052.46	1052.46	3.54	0.00187	MS2	1.43258	100	61.8704	6499	1.28	1
Low	Unambiguous	VNPhGY	H4(4-amide-pLEN no click)	1	EThcD (ETD With Supplemental HCD)	pet28a_-_CULT_translation	0	2	0.1944	0	1	526.736	1052.46	1052.46	3.54	0.00187	MS2	1.43258	200	61.8782	6501	1.44	1
Low	Unambiguous	VNPhGY	H4(4-amide-pLEN no click)	1	CID (Collision Induced Dissociation)	pet28a_-_CULT_translation	0	2	0.0781	0	1	526.736	1052.46	1052.46	3.54	0.00187	MS2	1.43258	35	61.9085	6503	1.28	1
Low	Unambiguous	VNPhGY	H4(4-amide-pLEN no click)	1	HCD (High Energy Collision Dissociation)	pet28a_-_CULT_translation	0	2	0.0413	0	1	526.735	1052.46	1052.46	1.22	0.00064	MS2	2.33279	100	61.9131	6506	1.21	1
Low	Unambiguous	VNPhGY	H4(4-amide-pLEN no click)	1	EThcD (ETD With Supplemental HCD)	pet28a_-_CULT_translation	0	2	0.2123	0	1	526.735	1052.46	1052.46	1.22	0.00064	MS2	2.33279	125.56	61.9212	6507	1.46	1
Low	Unambiguous	VNPhGY	H4(4-amide-pLEN no click)	1	CID (Collision Induced Dissociation)	pet28a_-_CULT_translation	0	2	0.0923	0	1	526.735	1052.46	1052.46	1.22	0.00064	MS2	2.33279	25.112	61.9364	6508	1.3	1
Low	Unambiguous	VNPhGY	H4(4-amide-pLEN no click)	1	HCD (High Energy Collision Dissociation)	pet28a_-_CULT_translation	0	2	0.064	0	1	526.735	1052.46	1052.46	2.96	0.00156	MS2	0	100	62.4719	6596	1.25	1
Low	Unambiguous	VNPhGY	H4(4-amide-pLEN no click)	1	EThcD (ETD With Supplemental HCD)	pet28a_-_CULT_translation	0	2	0.1633	0	1	526.735	1052.46	1052.46	2.96	0.00156	MS2	0	200	62.4796	6598	1.47	1
Medium	Unambiguous	VNPhGY	H4(4-amide-pLEN no click)	1	HCD (High Energy Collision Dissociation)	pet28a_-_CULT_translation	0	2	0.0602	0	1	526.734	1052.46	1052.46	0.41	0.00022	MS2	2.027	100	62.5163	6603	1.33	1
Low	Unambiguous	VNPhGY	H4(4-amide-pLEN no click)	1	EThcD (ETD With Supplemental HCD)	pet28a_-_CULT_translation	0	2	0.2081	0	1	526.734	1052.46	1052.46	0.41	0.00022	MS2	2.027	153.605	62.5243	6604	1.49	1
Low	Unambiguous	VNPhGY	H4(4-amide-pLEN no click)	1	CID (Collision Induced Dissociation)	pet28a_-_CULT_translation	0	2	0.0097	0	1	526.734	1052.46	1052.46	0.41	0.00022	MS2	2.027	30.721	62.5403	6605	1.03	1
Medium	Unambiguous	VNPhGY	H4(4-amide-pLEN no click)	1	HCD (High Energy Collision Dissociation)	pet28a_-_CULT_translation	0	2	0.0764	0	1	526.734	1052.46	1052.46	0.53	0.00028	MS2	1.63753	100	63.0605	6685	1.57	1
Low	Unambiguous	VNPhGY	H4(4-amide-pLEN no click)	1	EThcD (ETD With Supplemental HCD)	pet28a_-_CULT_translation	0	2	0.2267	0	1	526.734	1052.46	1052.46	0.53	0.00028	MS2	1.63753	200	63.0683	6687	1.5	1
Low	Selected	VNPhGY	H4(4-amide-pLEN no click)	1	CID (Collision Induced Dissociation)	pet28a_-_CULT_translation	0	2	0.04	0	1	526.734	1052.46	1052.46	0.53	0.00028	MS2	1.63753	35	63.1012	6689	1.25	1
Low	Unambiguous	VNPhGY	H4(4-amide-pLEN no click)	1	HCD (High Energy Collision Dissociation)	pet28a_-_CULT_translation	0	2	0.0684	0	1	526.735	1052.46	1052.46	1.92	0.00101	MS2	2.6785	100	63.127	6695	1.17	1
Low	Unambiguous	VNPhGY	H4(4-amide-pLEN no click)	1	EThcD (ETD With Supplemental HCD)	pet28a_-_CULT_translation	0	2	0.2434	0	1	526.735	1052.46	1052.46	1.92	0.00101	MS2	2.6785	200	63.1346	6697	1.52	1
Low	Selected	VNPhGY	H4(4-amide-pLEN no click)	1	CID (Collision Induced Dissociation)	pet28a_-_CULT_translation	0	2	0.025	0	1	526.735	1052.46	1052.46	1.92	0.00101	MS2	2.6785	35	63.1676	6699	0.8	1
Low	Unambiguous	VNPHGyVHETL	Y6(4-amide-pLEN-12C)	1	HCD (High Energy Collision Dissociation)	pet28a_-_CULT_translation	1	3	0.0229	0	1	592.615	1775.83	1775.83	1.52	0.0009	MS2	4.45156	100	67.4919	7338	1.75	1
Low	Unambiguous	VNPHGyVHETL	Y6(4-amide-pLEN-12C)	1	EThcD (ETD With Supplemental HCD)	pet28a_-_CULT_translation	1	3	0.0444	0	1	592.615	1775.83	1775.83	1.52	0.0009	MS2	4.45156	200	67.4995	7339	2.7	1
Low	Unambiguous	VNPHGyVHETL	Y6(4-amide-pLEN-12C)	1	HCD (High Energy Collision Dissociation)	pet28a_-_CULT_translation	1	3	0.0238	0	1	592.614	1775.83	1775.83	1.01	0.0006	MS2	9.13432	100	67.5829	7351	1.68	1
Low	Unambiguous	VNPHGyVHETL	Y6(4-amide-pLEN-12C)	1	EThcD (ETD With Supplemental HCD)	pet28a_-_CULT_translation	1	3	0.0918	0	1	592.614	1775.83	1775.83	1.01	0.0006	MS2	9.13432	200	67.5906	7352	3.05	1
Low	Unambiguous	VNPHGyVHETL	Y6(4-amide-pLEN no click)	1	HCD (High Energy Collision Dissociation)	pet28a_-_CULT_translation	1	3	0.1164	0	1	544.596	1631.77	1631.76	6.12	0.00333	MS2	0	100	77.8397	8975	1.46	1
Low	Unambiguous	VNPHGyVHETL	Y6(4-amide-pLEN no click)	1	EThcD (ETD With Supplemental HCD)	pet28a_-_CULT_translation	1	3	0.0394	0	1	544.596	1631.77	1631.76	6.12	0.00333	MS2	0	200	77.8428	8977	2.03	1

## Sheet: Table S6
Table S5 i-pLen pair2 quantification
Confidence	PSM Ambiguity	Annotated Sequence	Modifications	15N_fraction_mean	15N_fraction_sd	# Proteins	Master Protein Accessions	# Missed Cleavages	Charge	DeltaScore	DeltaCn	Search Engine Rank	m/z [Da]	MH+ [Da]	Theo. MH+ [Da]	DeltaM [ppm]	Deltam/z [Da]	Activation Type	MS Order	Isolation Interference [%]	Ion Inject Time [ms]	RT [min]	First Scan	XCorr	# Protein Groups	activation	idx_duty_cycle	MS2_others	target_mz	MS2_etd
Medium	Unambiguous	VNPhGY	H4(4-amide-pLEN-12C)	0.933965	0.000656152	1	pet28a_-_CULT_translation	0	2	0.047	0	1	598.768	1196.53	1196.52	2.55	0.00153	HCD	MS2	10.3884	100	53.8785	5319	1.49	1	hcd	4223	5319	598.768	5320
Medium	Unambiguous	VNPhGY	H4(4-amide-pLEN-12C)	0.942332	0.000607633	1	pet28a_-_CULT_translation	0	2	0.0634	0	1	598.768	1196.53	1196.52	3.67	0.0022	HCD	MS2	0	100	53.9154	5324	1.42	1	hcd	4224	5324	598.768	5326
Medium	Unambiguous	VNPhGY	H4(4-amide-pLEN-12C)	0.947073	0.000528483	1	pet28a_-_CULT_translation	0	2	0.0197	0	1	598.768	1196.53	1196.52	3.47	0.00208	HCD	MS2	10.0288	100	54.4654	5397	1.52	1	hcd	4232	5397	598.768	5399
Medium	Unambiguous	VNPhGY	H4(4-amide-pLEN-12C)	0.944816	0.000635449	1	pet28a_-_CULT_translation	0	2	0.0329	0	1	598.767	1196.53	1196.52	1.63	0.00098	HCD	MS2	10.3491	100	54.542	5407	1.52	1	hcd	4233	5407	598.767	5410
Medium	Unambiguous	VNPhGY	H4(4-amide-pLEN-12C)	0.942977	0.000572093	1	pet28a_-_CULT_translation	0	2	0.0441	0	1	598.768	1196.53	1196.52	2.86	0.00171	HCD	MS2	6.82834	100	55.1011	5483	1.36	1	hcd	4245	5483	598.768	5485
Medium	Unambiguous	VNPhGY	H4(4-amide-pLEN-12C)	0.939866	0.000600328	1	pet28a_-_CULT_translation	0	2	0.0544	0	1	598.767	1196.53	1196.52	2.04	0.00122	HCD	MS2	8.46778	100	55.1979	5496	1.47	1	hcd	4246	5496	598.767	5498
Medium	Unambiguous	VNPhGY	H4(4-amide-pLEN no click)	0.941488	0.000631107	1	pet28a_-_CULT_translation	0	2	0.0862	0	1	526.735	1052.46	1052.46	2.85	0.0015	HCD	MS2	11.5874	100	61.1884	6387	1.16	1	hcd	4505	6387	526.735	6389
Medium	Unambiguous	VNPhGY	H4(4-amide-pLEN no click)	0.949109	0.000488377	1	pet28a_-_CULT_translation	0	2	0.0847	0	1	526.734	1052.46	1052.46	0.88	0.00046	HCD	MS2	10.1937	100	61.293	6404	1.18	1	hcd	4506	6404	526.734	6406
Medium	Unambiguous	VNPhGY	H4(4-amide-pLEN no click)	0.950334	0.000472089	1	pet28a_-_CULT_translation	0	2	0.0781	0	1	526.736	1052.46	1052.46	3.54	0.00187	HCD	MS2	1.43258	100	61.8704	6499	1.28	1	hcd	4515	6499	526.736	6501
Medium	Unambiguous	VNPhGY	H4(4-amide-pLEN no click)	0.950873	0.000508355	1	pet28a_-_CULT_translation	0	2	0.0413	0	1	526.735	1052.46	1052.46	1.22	0.00064	HCD	MS2	2.33279	100	61.9131	6506	1.21	1	hcd	4516	6506	526.735	6507
Medium	Unambiguous	VNPhGY	H4(4-amide-pLEN no click)	0.949999	0.000492705	1	pet28a_-_CULT_translation	0	2	0.064	0	1	526.735	1052.46	1052.46	2.96	0.00156	HCD	MS2	0	100	62.4719	6596	1.25	1	hcd	4528	6596	526.735	6598
Medium	Unambiguous	VNPhGY	H4(4-amide-pLEN no click)	0.951153	0.000452958	1	pet28a_-_CULT_translation	0	2	0.0602	0	1	526.734	1052.46	1052.46	0.41	0.00022	HCD	MS2	2.027	100	62.5163	6603	1.33	1	hcd	4529	6603	526.734	6604
High	Unambiguous	VNPhGY	H4(4-amide-pLEN no click)	0.95181	0.000500433	1	pet28a_-_CULT_translation	0	2	0.0764	0	1	526.734	1052.46	1052.46	0.53	0.00028	HCD	MS2	1.63753	100	63.0605	6685	1.57	1	hcd	4548	6685	526.734	6687
Medium	Unambiguous	VNPhGY	H4(4-amide-pLEN no click)	0.948707	0.000517417	1	pet28a_-_CULT_translation	0	2	0.0684	0	1	526.735	1052.46	1052.46	1.92	0.00101	HCD	MS2	2.6785	100	63.127	6695	1.17	1	hcd	4549	6695	526.735	6697
Medium	Unambiguous	VNPHGyVHETL	Y6(4-amide-pLEN-12C)	-0.111611	0.0124645	1	pet28a_-_CULT_translation	1	3	0.0229	0	1	592.615	1775.83	1775.83	1.52	0.0009	HCD	MS2	4.45156	100	67.4919	7338	1.75	1	hcd	4796	7338	592.615	7339
Medium	Unambiguous	VNPHGyVHETL	Y6(4-amide-pLEN-12C)	0.0559621	0.0105779	1	pet28a_-_CULT_translation	1	3	0.0238	0	1	592.614	1775.83	1775.83	1.01	0.0006	HCD	MS2	9.13432	100	67.5829	7351	1.68	1	hcd	4800	7351	592.615	7352
Low	Unambiguous	VNPHGyVHETL	Y6(4-amide-pLEN no click)	-0.163488	0.0115601	1	pet28a_-_CULT_translation	1	3	0.1164	0	1	544.596	1631.77	1631.76	6.12	0.00333	HCD	MS2	0	100	77.8397	8975	1.46	1	hcd	5129	8975	544.596	8977
