# Supplementary material for: The contribution of cyclic imide stereoisomers on cereblon-dependent activity
Source: Chem Sci. 2025 May 28;16(25):11519–29. doi: 10.1039/d5sc01371b (PMC12117711; doi:10.1039/d5sc01371b)
Supplement: SC-016-D5SC01371B-s004 [file SC-016-D5SC01371B-s004.xlsx]

## Sheet: Table S1
Thalidomide-FITC KD saturation binding (nM)	48.6	Reference	Protein	Name	IC50 (M)	+Error	-Error	IC50 (nM)	+Error	-Error	pIC50 (M)	+Error	-Error		KD (M)	+Error	-Error	KD (nM)	+Error	-Error	pKD (M)	+Error	-Error	KD / LOQ
Thalidomide-FITC KD 2-site (nM)	117.331	NCP-12-187	CRBN	S-LEN-d3	2.463e-08	1.87e-09	1.74e-09	24.63	1.87	1.74	7.60854	0.0329509	0.0306602		1.72703e-08	1.31123e-09	1.22007e-09	17.2703	1.31123	1.22007	7.7627	0.0329509	0.0306602	6.90813
Reference	NCP-12-161-v2	NCP-12-187	CRBN	R-LEN-d3	1.352e-06	1.42e-09	1.27e-09	1352	1.42	1.27	5.86902	0.000455828	0.000407678		9.4801e-07	9.95691e-10	8.90512e-10	948.01	0.995691	0.890512	6.02319	0.000455828	0.000407678	379.204
Concentration used in CRBN assay (nM)	50	NCP-12-187	CRBN	rac-LEN-d3	5.215e-08	4.17e-09	3.87e-09	52.15	4.17	3.87	7.28275	0.0347034	0.0322067		3.65671e-08	2.92397e-09	2.71361e-09	36.5671	2.92397	2.71361	7.43691	0.0347034	0.0322067	14.6268
Correction Factor	1.42615	NCP-12-187	CRBN	rac-LEN	4.786e-08	6e-09	5.36e-09	47.86	6	5.36	7.32003	0.0544087	0.0486051		3.3559e-08	4.20714e-09	3.75838e-09	33.559	4.20714	3.75838	7.47419	0.0544087	0.0486051	13.4236
Protein conc. used (LOQ) (nM)	2.5	NCP-13-69	CRBN	Me-LEN	1.531e-05	2.9568e-06	1.98217e-06	15310	2956.8	1982.17	4.81502	0.0838179	0.0561896		1.07352e-05	2.07328e-06	1.38988e-06	10735.2	2073.28	1389.88	4.96919	0.0838179	0.0561896	4294.09
		SI-II-141	CRBN	S-pLEN-d3	1.02206e-08	1.4308e-09	1.24784e-09	10.2206	1.4308	1.24784	7.99052	0.0607564	0.052987		7.16661e-09	1.00327e-09	8.7497e-10	7.16661	1.00327	0.87497	8.14469	0.0607564	0.052987	2.86664
		SI-II-141	CRBN	R-pLEN-d3	1.40612e-06	4.80304e-07	3.53702e-07	1406.12	480.304	353.702	5.85198	0.148246	0.10917		9.8596e-07	3.36784e-07	2.48012e-07	985.96	336.784	248.012	6.00614	0.148246	0.10917	394.384
		SI-II-141	CRBN	rac-pLEN-d3	2.52857e-08	5.80459e-09	4.6826e-09	25.2857	5.80459	4.6826	7.59712	0.0996291	0.0803714		1.77301e-08	4.07013e-09	3.28339e-09	17.7301	4.07013	3.28339	7.75129	0.0996291	0.0803714	7.09204
		SI-II-141	CRBN	rac-pLEN	2.68992e-08	6.67428e-09	5.29985e-09	26.8992	6.67428	5.29985	7.57026	0.107685	0.0855092		1.88615e-08	4.67994e-09	3.7162e-09	18.8615	4.67994	3.7162	7.72442	0.107685	0.0855092	7.5446
		NCP-13-69	CRBN	S-CC-885-d3	4.411e-09	2.17e-10	2.07e-10	4.411	0.217	0.207	8.35546	0.0213507	0.0203668		3.09295e-09	1.52158e-10	1.45146e-10	3.09295	0.152158	0.145146	8.50963	0.0213507	0.0203668	1.23718
		NCP-13-69	CRBN	R-CC-885-d3	5.717e-07	4.61e-08	4.25e-08	571.7	46.1	42.5	6.24283	0.0349963	0.0322634		4.00871e-07	3.23249e-08	2.98006e-08	400.871	32.3249	29.8006	6.397	0.0349963	0.0322634	160.348
		NCP-13-69	CRBN	rac-CC-885-d3	6.188e-09	3.08e-10	2.93e-10	6.188	0.308	0.293	8.20845	0.0216018	0.0205498		4.33897e-09	2.15967e-10	2.05449e-10	4.33897	0.215967	0.205449	8.36261	0.0216018	0.0205498	1.73559
		NCP-13-69	CRBN	rac-CC-885	5.169e-09	4.15e-10	3.81e-10	5.169	0.415	0.381	8.28659	0.0348443	0.0319896		3.62445e-09	2.90994e-10	2.67154e-10	3.62445	0.290994	0.267154	8.44076	0.0348443	0.0319896	1.44978
		NCP-2-45	CRBN	rac-JQ1-LEN-d3	3.52503e-09	6.70505e-10	5.85618e-10	3.52503	0.670505	0.585618	8.45284	0.0825522	0.072101		2.47172e-09	4.70152e-10	4.1063e-10	2.47172	0.470152	0.41063	8.607	0.0825522	0.072101	0.988688
		NCP-2-45	CRBN	S-JQ1-LEN-d3	1.65442e-09	2.64635e-10	2.60846e-10	1.65442	0.264635	0.260846	8.78135	0.0694209	0.0684271		1.16007e-09	1.8556e-10	1.82903e-10	1.16007	0.18556	0.182903	8.93552	0.0694209	0.0684271	0.464027
		NCP-2-45	CRBN	R-JQ1-LEN-d3	1.12492e-07	1.90867e-08	1.64439e-08	112.492	19.0867	16.4439	6.94888	0.0736377	0.0634416		7.88783e-08	1.33834e-08	1.15303e-08	78.8783	13.3834	11.5303	7.10304	0.0736377	0.0634416	31.5513
		NCP-2-45	CRBN + BD2	rac-JQ1-LEN-d3	8.42541e-08	1.93299e-08	1.59568e-08	84.2541	19.3299	15.9568	7.07441	0.0995701	0.0821948		5.90782e-08	1.3554e-08	1.11888e-08	59.0782	13.554	11.1888	7.22857	0.0995701	0.0821948	23.6313
		NCP-2-45	CRBN + BD2	S-JQ1-LEN-d3	4.26504e-08	1.24598e-08	9.75601e-09	42.6504	12.4598	9.75601	7.37008	0.126788	0.0992748		2.99061e-08	8.7367e-09	6.84082e-09	29.9061	8.7367	6.84082	7.52424	0.126788	0.0992748	11.9624
		NCP-2-45	CRBN + BD2	R-JQ1-LEN-d3	5.55504e-07	7.64769e-08	6.66196e-08	555.504	76.4769	66.6196	6.25531	0.0597493	0.052048		3.89514e-07	5.36249e-08	4.6713e-08	389.514	53.6249	46.713	6.40948	0.0597493	0.052048	155.806
		NCP-12-187	CRBN	JQ1-FcQ	1.37662e-07	1.30296e-08	1.18894e-08	137.662	13.0296	11.8894	6.86119	0.0410779	0.0374833		9.6527e-08	9.13624e-09	8.33675e-09	96.527	9.13624	8.33675	7.01535	0.0410779	0.0374833	38.6108
		NCP-12-187	CRBN	JQ1-FepicQ	8.40492e-07	8.79028e-08	7.92967e-08	840.492	87.9028	79.2967	6.07547	0.0453899	0.040946		5.89345e-07	6.16366e-08	5.56021e-08	589.345	61.6366	55.6021	6.22963	0.0453899	0.040946	235.738
		NCP-12-187	CRBN	JQ1-FcN	3.79909e-08	2.53203e-09	2.37571e-09	37.9909	2.53203	2.37571	7.42032	0.0289254	0.0271396		2.66389e-08	1.77544e-09	1.66583e-09	26.6389	1.77544	1.66583	7.57448	0.0289254	0.0271396	10.6556
		NCP-13-69	CRBN	JQ1-FepicN	1.81124e-06	1.21608e-07	1.13227e-07	1811.24	121.608	113.227	5.74202	0.0291391	0.0271307		1.27003e-06	8.52706e-08	7.93934e-08	1270.03	85.2706	79.3934	5.89619	0.0291391	0.0271307	508.011
		NCP-13-69	CRBN	Fmoc-GGGFcQ	1.27564e-07	1.03796e-08	9.56131e-09	127.564	10.3796	9.56131	6.89427	0.0353136	0.0325297		8.94464e-08	7.27805e-09	6.7043e-09	89.4464	7.27805	6.7043	7.04844	0.0353136	0.0325297	35.7785
		NCP-13-69	CRBN	Fmoc-GGGFepicQ	7.68689e-07	1.40236e-07	1.17329e-07	768.689	140.236	117.329	6.11425	0.0791766	0.0662434		5.38998e-07	9.83319e-08	8.22697e-08	538.998	98.3319	82.2697	6.26841	0.0791766	0.0662434	215.599
		NCP-13-69	CRBN	Fmoc-GGGFcN	5.2359e-08	4.76688e-09	4.3599e-09	52.359	4.76688	4.3599	7.28101	0.0395123	0.0361389		3.67137e-08	3.34249e-09	3.05712e-09	36.7137	3.34249	3.05712	7.43517	0.0395123	0.0361389	14.6855
		NCP-13-69	CRBN	Fmoc-GGGFepicN	4.08546e-06	7.38173e-07	5.93308e-07	4085.46	738.173	593.308	5.38876	0.0784163	0.0630273		2.86469e-06	5.176e-07	4.16022e-07	2864.69	517.6	416.022	5.54292	0.0784163	0.0630273	1145.88
		HCL 717	CRBN	lenalidomide	7.18494e-08	8.27072e-09	7.2713e-09	71.8494	8.27072	7.2713	7.14358	0.0499585	0.0439217		5.03802e-08	5.79935e-09	5.09857e-09	50.3802	5.79935	5.09857	7.29774	0.0499585	0.0439217	20.1521
		HCL 717	CRBN	GGGAcN	3.44489e-07	6.25425e-08	5.22676e-08	344.489	62.5425	52.2676	6.46283	0.0787935	0.0658487		2.41552e-07	4.38542e-08	3.66495e-08	241.552	43.8542	36.6495	6.61699	0.0787935	0.0658487	96.6209
		HCL 717	CRBN	GGGAepicN	1.12e-05	5.08e-06	2.67e-06	11200	5080	2670	4.95078	0.19685	0.103462		7.85334e-06	3.56205e-06	1.87218e-06	7853.34	3562.05	1872.18	5.10495	0.19685	0.103462	3141.33
Thal-FITC KD saturation binding (nM)	756	Reference	Protein	Name	IC50 (M)	+Error	-Error	IC50 (nM)	+Error	-Error	pIC50 (M)	+Error	-Error		KD (M)	+Error	-Error	KD (nM)	+Error	-Error	pKD (M)	+Error	-Error	KD / LOQ
Thal-FITC KD 2-site (nM)	-	NCP-1-37-20220928	CULT	rac-pLen	2.54355e-06	1.81192e-07	1.69038e-07	2543.55	181.192	169.038	5.59456	0.0309164	0.0288426		1.25599e-06	8.94718e-08	8.347e-08	1255.99	89.4718	83.47	5.90101	0.0309164	0.0288426	502.396
Reference	NCP-1-29-20220926	NCP-1-37-20220928	CULT	rac-pLen-d3	2.63451e-06	1.94998e-07	1.81681e-07	2634.51	194.998	181.681	5.5793	0.0321233	0.0299294		1.30091e-06	9.62892e-08	8.97132e-08	1300.91	96.2892	89.7132	5.88575	0.0321233	0.0299294	520.364
Concentration used in assay (nM)	775	NCP-1-37-20220928	CULT	(S)-pLen-d3	1.48466e-06	1.0448e-07	9.76288e-08	1484.66	104.48	97.6288	5.82837	0.0305418	0.0285392		7.33116e-07	5.15915e-08	4.82086e-08	733.116	51.5915	48.2086	6.13483	0.0305418	0.0285392	293.246
Correction Factor	2.02513	NCP-1-37-20220928	CULT	(R)-pLen-d3	2.29233e-05	1.6795e-06	1.54975e-06	22923.3	1679.5	1549.75	4.63972	0.0317974	0.029341		1.13194e-05	8.29327e-07	7.65259e-07	11319.4	829.327	765.259	4.94618	0.0317974	0.029341	4527.76
Protein conc. used (LOQ) (nM)	50
